# Supplementary material for: Plasmids as Persistent Genetic Reservoirs of Bacterial Defense Systems in Wastewater Treatment
Source: Research Square preprint supplement (doi:10.21203/rs.3.rs-7482919/v1), 2025-09-10

3 Countries

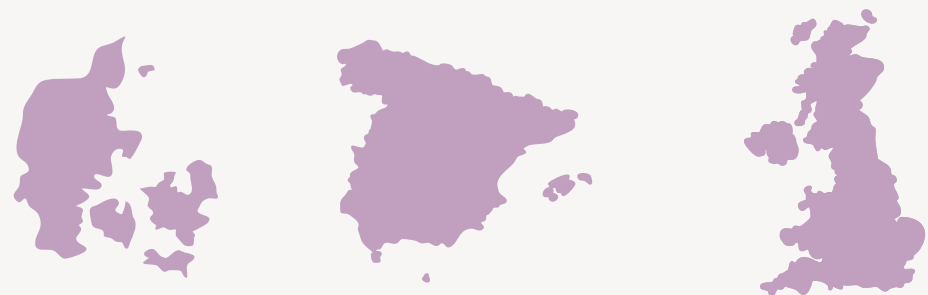

Denmark Spain United Kingdom

2 Seasons

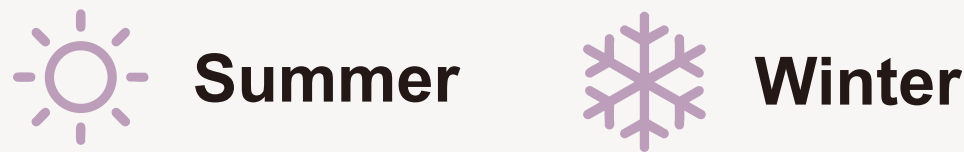

4 Compartments

Hospital  
Sewage

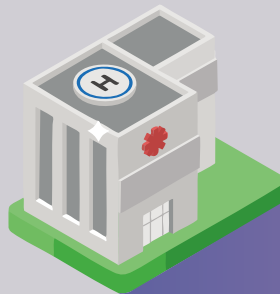

Mixed  
Sewage

Residential  
Sewage

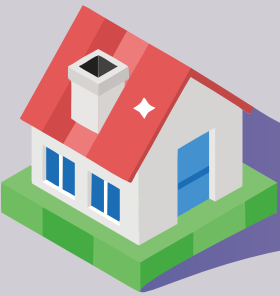

Biological  
Treatment  
Process

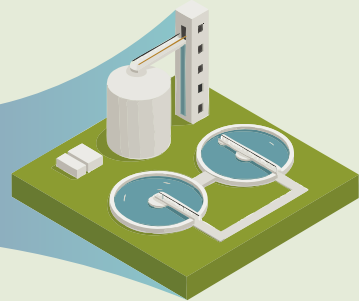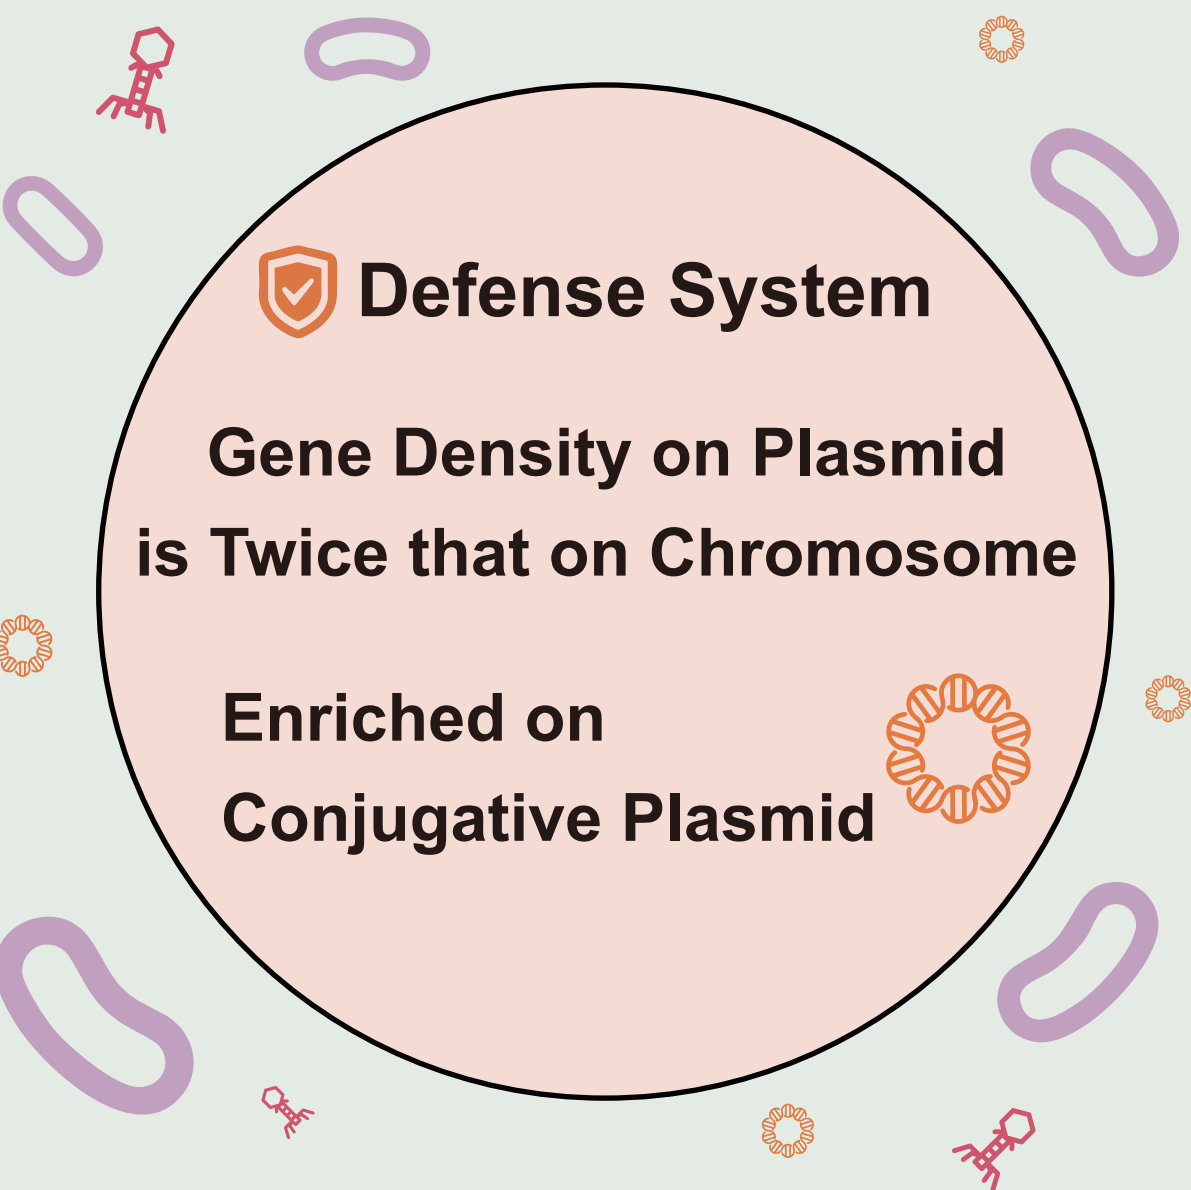

Trends of Defense from Sewage BTP

Richness Eveness Density Abundance Mobility

chromosome

plasmid

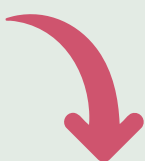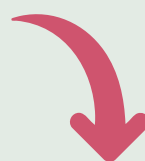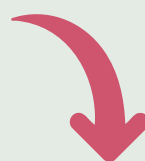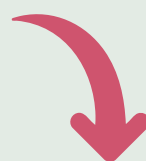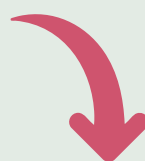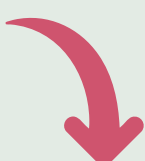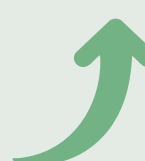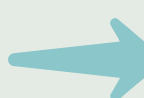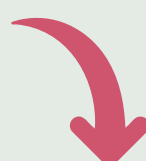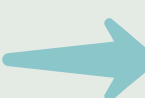

Defense-MGE Associate Gene Co-Mobilization

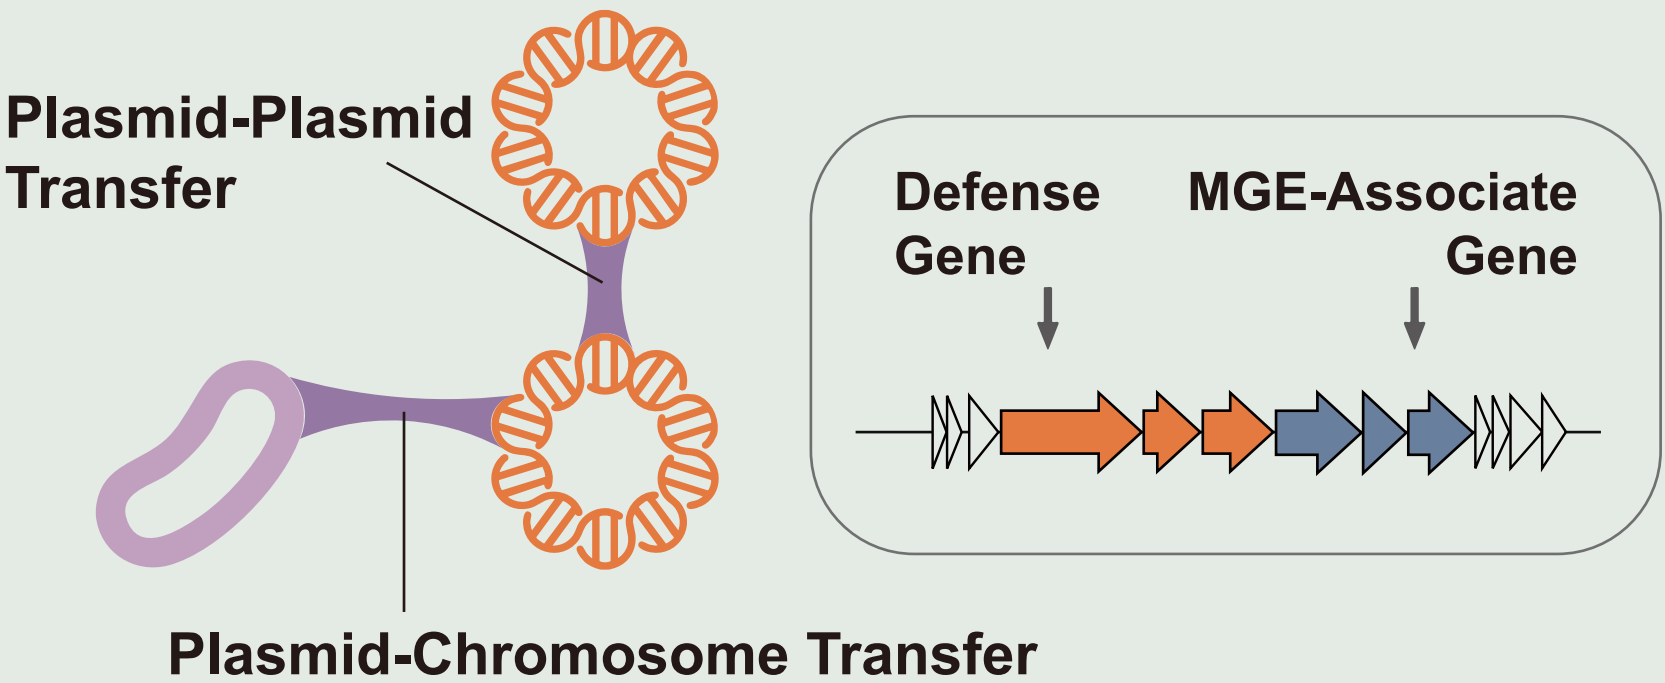

Defense-AntiDefense Arms Race

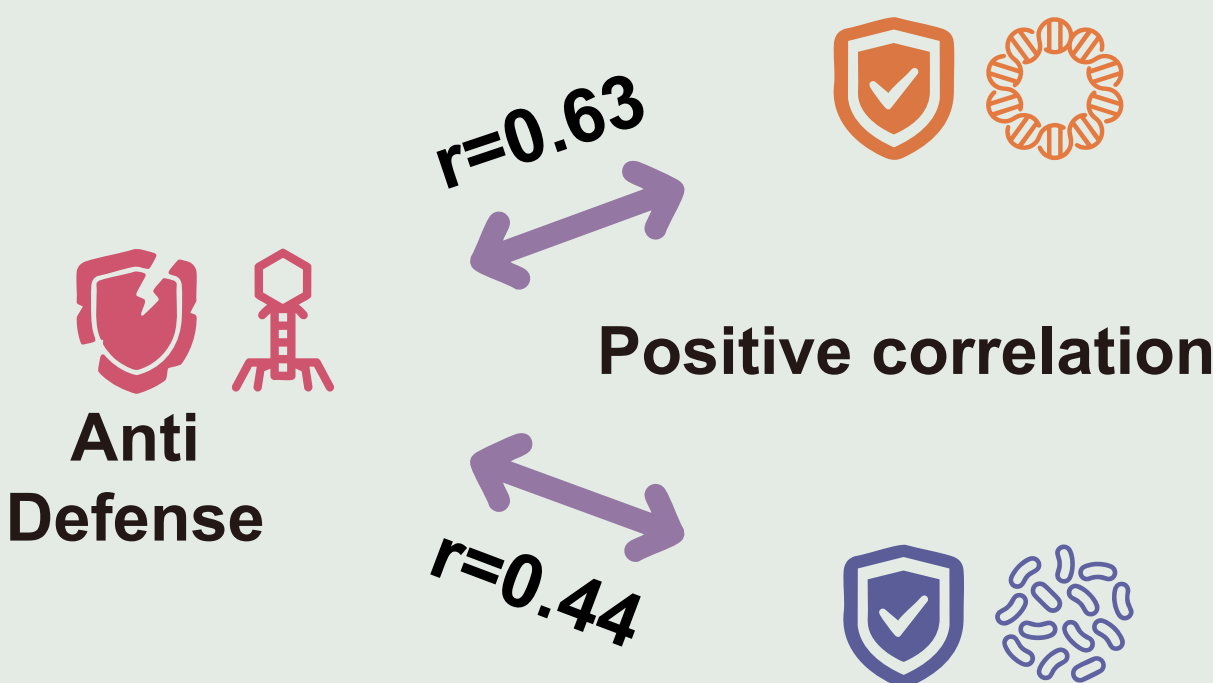

Supplement: Supplementary file 1 [file 293264783842d303536210a1.pdf]
