# Supplementary material for: Plasmids as Persistent Genetic Reservoirs of Bacterial Defense Systems in Wastewater Treatment
Source: Research Square preprint supplement (doi:10.21203/rs.3.rs-7482919/v1), 2025-09-10
Supplement: Supplementary file 1 [file f9db7932d76be354078160df.xlsx]

## Sheet: Table_Overview
SUPPLEMENTAL TABLES OVERVIEW
This Excel file contains 14 supplemental tables supporting the metagenomic analysis of bacterial defense systems in urban wastewater systems across three European countries.
Table S1 (Sheet 1)	Comprehensive sample metadata and sampling details.	Complete metadata for all 78 wastewater samples including sample IDs, collection dates, countries (Denmark, Spain, United Kingdom), compartments (Hospital Sewer, Residential Sewer, Mixed Sewer, Biological Treatment Process), seasons (Winter, Summer), sampling methods, and technical information for metagenomic and plasmidome sequencing.
Table S2 (Sheet 2)	Statistical analysis results.	Comprehensive statistical test results including correlation analyses, PERMANOVA results, ANOSIM statistics, significance values, and effect sizes for all comparative analyses presented in the manuscript.
Table S3 (Sheet 3)	Sample grouping information and contig annotation summary.	Statistical summary of contig classification and annotation results for each sample, including total contig counts, chromosomal contigs, plasmid contigs, phage contigs, and annotation success rates for defense systems, MGE elements, and anti defense classification.
Table S4 (Sheet 4)	Standardized defense system nomenclature mapping.	Comprehensive mapping table showing the standardization of defense system names across different annotation tools (PADLOC, DefenseFinder, CRISPRCasTyper). Includes original tool-specific nomenclature, standardized types and subtypes, functional categories, and verification status (verified vs. candidate systems).
Table S5 (Sheet 5)	Defense systems abundance data across all samples.	Matrix showing normalized abundance (TPM) values for all identified defense system subtypes across 78 samples (columns) and different genomic locations (rows). Data is organized from top to bottom showing defense system abundance on chromosomes, plasmids, and phages respectively. Each row represents a specific defense system subtype, and each column represents one of the 78 wastewater samples fro…
Table S6 (Sheet 6)	Group-specific defense system subtypes.	Summary of defense system subtypes that are unique to specific countries, compartments, or genome locations, showing only those defense systems that appear exclusively within particular geographic locations or treatment processes.
Table S7 (Sheet 7)	Defense system enrichment in the top 400 most abundant bacterial species.	Species-level analysis showing defense system abundance, diversity, and enrichment patterns across the most abundant bacterial species, including ecological classification (human-associated vs. non-human-associated).
Table S8 (Sheet 8)	Standardized MGE nomenclature mapping.	Comprehensive mapping of mobile genetic element annotations from proMGE and MGEfams databases, including standardized nomenclature, functional classifications (conjugative, transposase, recombinase, integrase, resolvase, mobilization), and corresponding protein families.
Table S9 (Sheet 9)	MGE abundance data across all samples.	Matrix showing normalized abundance (TPM) values for all identified MGE subtypes across 78 samples (columns) and different genomic locations (rows). Data is organized showing MGE abundance on chromosomes, plasmids, and phages respectively. Each row represents a specific MGE subtype, and each column represents one of the 78 wastewater samples from different compartments, countries, and seasons.
Table S10 (Sheet 10)	Statistically significant MGE-defense co-localization events.	Results from CooccurrenceAffinity analysis showing significant co-localization pairs between defense systems and MGE elements, including co-occurrence frequencies, statistical significance values, and genomic context (chromosome vs. plasmid).
Table S11 (Sheet 11)	Anti-defense system nomenclature standardization.	Standardized nomenclature for anti-defense systems identified from dbAPIS database, literature references, and DefenseFinder, including target defense systems, protein families.
Table S12 (Sheet 12)	Anti-defense system abundance across samples.	Matrix showing normalized abundance (TPM) values for all identified anti-defense system subtypes across 78 samples (columns) and different genomic locations (rows). Data is organized showing anti-defense system abundance on chromosomes, plasmids, and phages respectively. Each row represents a specific anti-defense system subtype, and each column represents one of the 78 wastewater samples from di…
Table S13 (Sheet 13)	Plasmid and phage host prediction results.	Host prediction results for plasmids and phages using sequence similarity and computational approaches, including predicted host taxa at species level.
Table S14 (Sheet 14)	CRISPR spacer-based linkage between defense and anti-defense systems.	Specific pairing relationships between bacterial defense systems and phage anti-defense systems identified through CRISPR spacer matching, including spacer sequences, target matches, and genomic organization.

## Sheet: Sheet1
Sample	Compartment	Country	Season
Sample_01	HS	DK	WINTER
Sample_02	HS	DK	WINTER
Sample_06	HS	DK	WINTER
Sample_07	HS	DK	WINTER
Sample_11	HS	DK	WINTER
Sample_12	HS	DK	WINTER
Sample_40	HS	DK	SUMMER
Sample_41	HS	DK	SUMMER
Sample_45	HS	DK	SUMMER
Sample_46	HS	DK	SUMMER
Sample_50	HS	DK	SUMMER
Sample_51	HS	DK	SUMMER
Sample_28	HS	SP	WINTER
Sample_32	HS	SP	WINTER
Sample_36	HS	SP	WINTER
Sample_67	HS	SP	SUMMER
Sample_71	HS	SP	SUMMER
Sample_75	HS	SP	SUMMER
Sample_16	HS	UK	WINTER
Sample_20	HS	UK	WINTER
Sample_24	HS	UK	WINTER
Sample_55	HS	UK	SUMMER
Sample_59	HS	UK	SUMMER
Sample_63	HS	UK	SUMMER
Sample_03	RS	DK	WINTER
Sample_08	RS	DK	WINTER
Sample_13	RS	DK	WINTER
Sample_42	RS	DK	SUMMER
Sample_47	RS	DK	SUMMER
Sample_52	RS	DK	SUMMER
Sample_29	RS	SP	WINTER
Sample_33	RS	SP	WINTER
Sample_37	RS	SP	WINTER
Sample_68	RS	SP	SUMMER
Sample_72	RS	SP	SUMMER
Sample_76	RS	SP	SUMMER
Sample_17	RS	UK	WINTER
Sample_21	RS	UK	WINTER
Sample_25	RS	UK	WINTER
Sample_56	RS	UK	SUMMER
Sample_60	RS	UK	SUMMER
Sample_64	RS	UK	SUMMER
Sample_04	MS	DK	WINTER
Sample_09	MS	DK	WINTER
Sample_14	MS	DK	WINTER
Sample_43	MS	DK	SUMMER
Sample_48	MS	DK	SUMMER
Sample_53	MS	DK	SUMMER
Sample_30	MS	SP	WINTER
Sample_34	MS	SP	WINTER
Sample_38	MS	SP	WINTER
Sample_69	MS	SP	SUMMER
Sample_73	MS	SP	SUMMER
Sample_77	MS	SP	SUMMER
Sample_18	MS	UK	WINTER
Sample_22	MS	UK	WINTER
Sample_26	MS	UK	WINTER
Sample_57	MS	UK	SUMMER
Sample_61	MS	UK	SUMMER
Sample_65	MS	UK	SUMMER
Sample_05	BTP	DK	WINTER
Sample_10	BTP	DK	WINTER
Sample_15	BTP	DK	WINTER
Sample_44	BTP	DK	SUMMER
Sample_49	BTP	DK	SUMMER
Sample_54	BTP	DK	SUMMER
Sample_31	BTP	SP	WINTER
Sample_35	BTP	SP	WINTER
Sample_39	BTP	SP	WINTER
Sample_70	BTP	SP	SUMMER
Sample_74	BTP	SP	SUMMER
Sample_78	BTP	SP	SUMMER
Sample_19	BTP	UK	WINTER
Sample_23	BTP	UK	WINTER
Sample_27	BTP	UK	WINTER
Sample_58	BTP	UK	SUMMER
Sample_62	BTP	UK	SUMMER
Sample_66	BTP	UK	SUMMER

## Sheet: Sheet2
Figure 1d
Country	Index	group1	group2	n1	n2	statistic	p	p.adj	p.adj.signif	Contig Classification
DK	Richness	HS	RS	12	6	9	0.013	0.0212727	*	Chromosome
DK	Richness	HS	MS	12	6	9	0.013	0.0212727	*	Chromosome
DK	Richness	HS	BTP	12	6	72	0.000874	0.006	**	Chromosome
DK	Richness	RS	MS	6	6	20	0.818	0.818	ns	Chromosome
DK	Richness	RS	BTP	6	6	36	0.002	0.006	**	Chromosome
DK	Richness	MS	BTP	6	6	36	0.002	0.006	**	Chromosome
SP	Richness	HS	RS	6	6	22.5	0.52	0.585	ns	Chromosome
SP	Richness	HS	MS	6	6	25	0.31	0.398571	ns	Chromosome
SP	Richness	HS	BTP	6	6	36	0.005	0.01	**	Chromosome
SP	Richness	RS	MS	6	6	23	0.468	0.5616	ns	Chromosome
SP	Richness	RS	BTP	6	6	36	0.005	0.01	**	Chromosome
SP	Richness	MS	BTP	6	6	36	0.005	0.01	**	Chromosome
UK	Richness	HS	RS	6	6	5.5	0.054	0.081	ns	Chromosome
UK	Richness	HS	MS	6	6	14	0.574	0.607765	ns	Chromosome
UK	Richness	HS	BTP	6	6	36	0.002	0.006	**	Chromosome
UK	Richness	RS	MS	6	6	30	0.065	0.09	ns	Chromosome
UK	Richness	RS	BTP	6	6	36	0.002	0.006	**	Chromosome
UK	Richness	MS	BTP	6	6	36	0.002	0.006	**	Chromosome
DK	Evenness	HS	RS	12	6	9	0.01	0.0163636	*	Chromosome
DK	Evenness	HS	MS	12	6	10	0.014	0.0207692	*	Chromosome
DK	Evenness	HS	BTP	12	6	72	0.000108	0.001944	**	Chromosome
DK	Evenness	RS	MS	6	6	24	0.394	0.417176	ns	Chromosome
DK	Evenness	RS	BTP	6	6	36	0.002	0.004	**	Chromosome
DK	Evenness	MS	BTP	6	6	36	0.002	0.004	**	Chromosome
SP	Evenness	HS	RS	6	6	30	0.065	0.073125	ns	Chromosome
SP	Evenness	HS	MS	6	6	36	0.002	0.004	**	Chromosome
SP	Evenness	HS	BTP	6	6	36	0.002	0.004	**	Chromosome
SP	Evenness	RS	MS	6	6	34	0.009	0.0162	*	Chromosome
SP	Evenness	RS	BTP	6	6	36	0.002	0.004	**	Chromosome
SP	Evenness	MS	BTP	6	6	36	0.002	0.004	**	Chromosome
DK	Abundance	HS	RS	12	6	3	0.000754	0.0045	**	Chromosome
DK	Abundance	HS	MS	12	6	0	0.000108	0.000972	***	Chromosome
DK	Abundance	HS	BTP	12	6	72	0.000108	0.000972	***	Chromosome
DK	Abundance	RS	MS	6	6	10	0.24	0.332308	ns	Chromosome
DK	Abundance	RS	BTP	6	6	36	0.002	0.0045	**	Chromosome
DK	Abundance	MS	BTP	6	6	36	0.002	0.0045	**	Chromosome
SP	Abundance	HS	RS	6	6	10	0.24	0.332308	ns	Chromosome
SP	Abundance	HS	MS	6	6	15	0.699	0.786375	ns	Chromosome
SP	Abundance	HS	BTP	6	6	36	0.002	0.0045	**	Chromosome
SP	Abundance	RS	MS	6	6	22	0.589	0.757286	ns	Chromosome
SP	Abundance	RS	BTP	6	6	36	0.002	0.0045	**	Chromosome
SP	Abundance	MS	BTP	6	6	36	0.002	0.0045	**	Chromosome
UK	Abundance	HS	RS	6	6	4	0.026	0.052	ns	Chromosome
UK	Abundance	HS	MS	6	6	6	0.065	0.117	ns	Chromosome
UK	Abundance	HS	BTP	6	6	16	0.818	0.818	ns	Chromosome
UK	Abundance	RS	MS	6	6	15	0.699	0.786375	ns	Chromosome
UK	Abundance	RS	BTP	6	6	20	0.818	0.818	ns	Chromosome
UK	Abundance	MS	BTP	6	6	27	0.18	0.294545	ns	Chromosome
UK	Evenness	HS	RS	6	6	33	0.015	0.0207692	*	Plasmid
UK	Evenness	HS	MS	6	6	36	0.002	0.004	**	Plasmid
UK	Evenness	HS	BTP	6	6	36	0.002	0.004	**	Plasmid
UK	Evenness	RS	MS	6	6	32	0.026	0.0334286	*	Plasmid
UK	Evenness	RS	BTP	6	6	31	0.041	0.0492	*	Plasmid
UK	Evenness	MS	BTP	6	6	19	0.937	0.937	ns	Plasmid
DK	Richness	HS	RS	12	6	18	0.1	0.138462	ns	Plasmid
DK	Richness	HS	MS	12	6	19	0.121	0.155571	ns	Plasmid
DK	Richness	HS	BTP	12	6	72	0.000863	0.009	**	Plasmid
DK	Richness	RS	MS	6	6	21	0.687	0.687	ns	Plasmid
DK	Richness	RS	BTP	6	6	36	0.005	0.01	**	Plasmid
DK	Richness	MS	BTP	6	6	36	0.005	0.01	**	Plasmid
SP	Richness	HS	RS	6	6	33	0.015	0.027	*	Plasmid
SP	Richness	HS	MS	6	6	31	0.041	0.0615	ns	Plasmid
SP	Richness	HS	BTP	6	6	36	0.002	0.009	**	Plasmid
SP	Richness	RS	MS	6	6	25.5	0.261	0.293625	ns	Plasmid
SP	Richness	RS	BTP	6	6	36	0.002	0.009	**	Plasmid
SP	Richness	MS	BTP	6	6	36	0.002	0.009	**	Plasmid
UK	Richness	HS	RS	6	6	12	0.378	0.400235	ns	Plasmid
UK	Richness	HS	MS	6	6	26	0.229	0.2748	ns	Plasmid
UK	Richness	HS	BTP	6	6	36	0.005	0.01	**	Plasmid
UK	Richness	RS	MS	6	6	32.5	0.025	0.0409091	*	Plasmid
UK	Richness	RS	BTP	6	6	36	0.005	0.01	**	Plasmid
UK	Richness	MS	BTP	6	6	36	0.005	0.01	**	Plasmid
DK	Evenness	HS	RS	12	6	22	0.213	0.47925	ns	Plasmid
DK	Evenness	HS	MS	12	6	17	0.083	0.213429	ns	Plasmid
DK	Evenness	HS	BTP	12	6	0	0.000108	0.001944	**	Plasmid
DK	Evenness	RS	MS	6	6	15	0.699	0.8388	ns	Plasmid
DK	Evenness	RS	BTP	6	6	0	0.002	0.006	**	Plasmid
DK	Evenness	MS	BTP	6	6	0	0.002	0.006	**	Plasmid
SP	Evenness	HS	RS	6	6	12	0.394	0.644727	ns	Plasmid
SP	Evenness	HS	MS	6	6	10	0.24	0.48	ns	Plasmid
SP	Evenness	HS	BTP	6	6	0	0.002	0.006	**	Plasmid
SP	Evenness	RS	MS	6	6	14	0.589	0.757286	ns	Plasmid
SP	Evenness	RS	BTP	6	6	0	0.002	0.006	**	Plasmid
SP	Evenness	MS	BTP	6	6	0	0.002	0.006	**	Plasmid
UK	Evenness	HS	RS	6	6	13	0.485	0.7275	ns	Plasmid
UK	Evenness	HS	MS	6	6	22	0.589	0.757286	ns	Plasmid
UK	Evenness	HS	BTP	6	6	18	1	1	ns	Plasmid
UK	Evenness	RS	MS	6	6	24	0.394	0.644727	ns	Plasmid
UK	Evenness	RS	BTP	6	6	20	0.818	0.92025	ns	Plasmid
UK	Evenness	MS	BTP	6	6	18	1	1	ns	Plasmid
DK	Abundance	HS	RS	12	6	23	0.25	0.375	ns	Plasmid
DK	Abundance	HS	MS	12	6	12	0.024	0.0585	ns	Plasmid
DK	Abundance	HS	BTP	12	6	72	0.000108	0.001944	**	Plasmid
DK	Abundance	RS	MS	6	6	17	0.937	0.937	ns	Plasmid
DK	Abundance	RS	BTP	6	6	36	0.002	0.0072	**	Plasmid
DK	Abundance	MS	BTP	6	6	36	0.002	0.0072	**	Plasmid
SP	Abundance	HS	RS	6	6	31	0.041	0.082	ns	Plasmid
SP	Abundance	HS	MS	6	6	32	0.026	0.0585	ns	Plasmid
SP	Abundance	HS	BTP	6	6	36	0.002	0.0072	**	Plasmid
SP	Abundance	RS	MS	6	6	23	0.485	0.582	ns	Plasmid
SP	Abundance	RS	BTP	6	6	36	0.002	0.0072	**	Plasmid
SP	Abundance	MS	BTP	6	6	33	0.015	0.045	*	Plasmid
UK	Abundance	HS	RS	6	6	23	0.485	0.582	ns	Plasmid
UK	Abundance	HS	MS	6	6	22	0.589	0.623647	ns	Plasmid
UK	Abundance	HS	BTP	6	6	27	0.18	0.294545	ns	Plasmid
UK	Abundance	RS	MS	6	6	14	0.589	0.623647	ns	Plasmid
UK	Abundance	RS	BTP	6	6	24	0.394	0.545538	ns	Plasmid
UK	Abundance	MS	BTP	6	6	29	0.093	0.1674	ns	Plasmid
Figure 1f
Comparison	F_value	R2	p_value	adjusted_p
BTP vs HS	28.1174	0.412779	0.001	0.0012
BTP vs MS	25.5101	0.428669	0.001	0.0012
BTP vs RS	30.4769	0.472679	0.001	0.0012
HS vs MS	6.44085	0.138689	0.001	0.0012
HS vs RS	4.07742	0.0925059	0.001	0.0012
MS vs RS	2.83685	0.0770112	0.016	0.016
Figure 2a
Comparison	F_value	R2	p_value	adjusted_p
hollow_whole_col vs hollow_whole_col_df	0.856083	25.5099	0.001	0.001
hollow_whole_col vs solid_whole_col	0.36595	1.34898	0.001	0.001
hollow_whole_col vs solid_whole_col_df	0.774814	11.6318	0.001	0.001
hollow_whole_col_df vs solid_whole_col	0.800388	11.9164	0.001	0.001
hollow_whole_col_df vs solid_whole_col_df	0.413296	2.82846	0.001	0.001
solid_whole_col vs solid_whole_col_df	0.78396	7.48966	0.001	0.001
Figure 2e
GTDB_Phylum	Diversity_Index	Correlation	P_value
p__Acidobacteriota	Richness	0.796786	9.08692e-06
p__Actinomycetota	Richness	0.736531	6.57206e-11
p__Bacillota	Richness	0.769335	6.70132e-11
p__Bacillota_A	Richness	0.710278	2.40448e-11
p__Bacteroidota	Richness	0.681367	1.25133e-11
p__Campylobacterota	Richness	0.788817	4.38134e-14
p__Chloroflexota	Richness	0.629622	0.00510941
p__Myxococcota	Richness	0.582259	0.00561576
p__Pseudomonadota	Richness	0.518935	1.13035e-06
p__Verrucomicrobiota	Richness	0.630123	0.000560541
Figure 2f
GTDB_Phylum	Index	correlation	p_value
p__Acidobacteriota	Abundance	-0.229313	0.0434316
p__Actinomycetota	Abundance	-0.274989	0.0148261
p__Bacillota	Abundance	0.253268	0.0252664
p__Bacillota_A	Abundance	-0.0177939	0.877116
p__Bacteroidota	Abundance	0.0764007	0.506158
p__Campylobacterota	Abundance	0.383865	0.000521641
p__Chloroflexota	Abundance	-0.240057	0.0342633
p__Myxococcota	Abundance	-0.133045	0.245554
p__Pseudomonadota	Abundance	0.0836406	0.466586
p__Verrucomicrobiota	Abundance	-0.135082	0.238331
Figure 3g
Level	p_value	Median_Taxa	Median_Defense	Median_Diff	Cliff_Estimate	Cliff_Magnitude	adjusted_p	significant
Phylum	6.86394338435463e-270	0.00143391251092314	0.000815389653252022	0.000618522857671117	0.52301444808937	large	4.11836603061278e-269	TRUE
Class	1.75346061318698e-130	0.000597594719240416	0.000815389653252022	-0.000217795	-0.362161	medium	1.05207636791219e-129	TRUE
Order	0	0.000299772634038563	0.000815389653252022	-0.000515617	-0.882848	large	0	TRUE
Family	0	0.000135458988966251	0.000815389653252022	-0.000679931	-0.992569	large	0	TRUE
Genus	0	3.68361521003607e-05	0.000815389653252022	-0.000778554	-1	large	0	TRUE
Species	0	1.07927879866912e-05	0.000815389653252022	-0.000804597	-1	large	0	TRUE
Figure 3a
Statistic	Value
Pearson Correlation Coefficient (r)	0.8296
P-value	1.5e-26
95% Confidence Interval Lower	0.7565
95% Confidence Interval Upper	0.8823
Significance Level	p < 0.001
Figure 3e
Taxonomic_Level	statistic	df	p	method	p.adj	Group
GTDB_Phylum	17.8209020767894	2	0.000135	Kruskal-Wallis	0.000162	With Defense
GTDB_Class	17.8209020767894	2	0.000135	Kruskal-Wallis	0.000162	With Defense
GTDB_Order	20.3116154873164	2	3.88e-05	Kruskal-Wallis	8.58e-05	With Defense
GTDB_Family	20.3961718228355	2	3.72e-05	Kruskal-Wallis	8.58e-05	With Defense
GTDB_Genus	20.1124401913876	2	4.29e-05	Kruskal-Wallis	8.58e-05	With Defense
GTDB_Species	6.59135960892147	2	0.037	Kruskal-Wallis	0.037	With Defense
GTDB_Phylum	13.5822781475741	2	0.00112	Kruskal-Wallis	0.00112	No Defense
GTDB_Class	19.5037601824698	2	5.82e-05	Kruskal-Wallis	8.73e-05	No Defense
GTDB_Order	17.5018328445748	2	0.000158	Kruskal-Wallis	0.0001896	No Defense
GTDB_Family	22.0644628099174	2	1.62e-05	Kruskal-Wallis	3.24e-05	No Defense
GTDB_Genus	22.350439882698	2	1.4e-05	Kruskal-Wallis	3.24e-05	No Defense
GTDB_Species	26.2087809917356	2	2.04e-06	Kruskal-Wallis	1.224e-05	No Defense

## Sheet: Sheet3
Non Redundant Contig (3,202,363)
Contig Classification	Total Contigs	With Defense	With Mobility Gene	With Anti Defense
Plasmid	83919	4435	33862	9156
Phage	52485	427	3997	6517
Chromosome	3065959	28080	145010	149563
Compartment	Total Contigs	With Defense	With Mobility Gene	With Anti Defense
HS	985489	10589	64932	55500
RS	627639	7911	44447	36167
MS	433248	5883	31182	25172
BTP	1155987	8559	42308	48397
Country	Total Contigs	With Defense	With Mobility Gene	With Anti Defense
DK	1303493	13113	73200	63935
SP	1059756	11051	56951	54897
UK	839114	8778	52718	46404
Redundant Contig (8,871,613)
Contig Classification	Total Contigs	With Defense	With Mobility Gene	With Anti Defense
Plasmid	287444	10576	106445	25677
Phage	109283	862	10091	12000
Chromosome	8474886	70361	357864	403444
Compartment	Total Contigs	With Defense	With Mobility Gene	With Anti Defense
HS	2976059	27516	173795	155308
RS	2229821	22537	129827	116383
MS	1669303	17387	96243	86991
BTP	1996430	14359	74535	82439
Country	Total Contigs	With Defense	With Mobility Gene	With Anti Defense
DK	3703023	33744	192277	179486
SP	2839036	26138	146396	140304
UK	2329554	21917	135727	121331

## Sheet: Sheet4
deffinder_type	deffinder_subtype	padloc_subtype	cctyper_subtype	unified type	unified subtype	keep	comment	Defense_Mechanisms	Defense_Candidate
Rst_2TM_1TM_TIR	Rst_2TM_1TM_TIR	2TM-1TM-TIR		2TM-1TM-TIR	2TM-1TM-TIR	TRUE		Unknown	Verified_Defense
Rst_3HP	Rst_3HP	3HP		3HP	3HP	TRUE		Unknown	Verified_Defense
Abi2	Abi2			Abi2	Abi2	TRUE		Population_level_protection	Verified_Defense
AbiB	AbiB	AbiB		AbiB	AbiB	TRUE		Population_level_protection	Verified_Defense
AbiC	AbiC	AbiC		AbiC	AbiC	TRUE		Population_level_protection	Verified_Defense
AbiD	AbiD	AbiD		AbiD	AbiD	TRUE		Population_level_protection	Verified_Defense
AbiE	AbiE	AbiE		AbiE	AbiE	TRUE		Population_level_protection	Verified_Defense
SanaTA	SanaTA			AbiE	AbiE	TRUE	SanaTA == AbiE	Population_level_protection	Verified_Defense
AbiG	AbiG	AbiG		AbiG	AbiG	TRUE		Population_level_protection	Verified_Defense
AbiH	AbiH	AbiH		AbiH	AbiH	TRUE		Population_level_protection	Verified_Defense
AbiI	AbiI	AbiI		AbiI	AbiI	TRUE		Population_level_protection	Verified_Defense
AbiJ	AbiJ	AbiJ		AbiJ	AbiJ	TRUE		Population_level_protection	Verified_Defense
AbiL	AbiL	AbiL		AbiL	AbiL	TRUE		Population_level_protection	Verified_Defense
AbiN	AbiN	AbiN		AbiN	AbiN	TRUE		Population_level_protection	Verified_Defense
AbiO	AbiO	AbiO-Nhi_family		AbiO/Nhi	AbiO/Nhi	TRUE		Degradation_of_foreign_nucleic_acids	Verified_Defense
Nhi	Nhi	AbiO-Nhi_family		AbiO/Nhi	AbiO/Nhi	TRUE		Degradation_of_foreign_nucleic_acids	Verified_Defense
		AbiP		AbiP	AbiP	TRUE		Population_level_protection	Verified_Defense
AbiQ	AbiQ	AbiQ		AbiQ	AbiQ	TRUE		Population_level_protection	Verified_Defense
AbiR	AbiR			AbiR	AbiR	TRUE		Population_level_protection	Verified_Defense
AbiT	AbiT	AbiT		AbiT	AbiT	TRUE		Population_level_protection	Verified_Defense
AbiU	AbiU	AbiU		AbiU	AbiU	TRUE		Population_level_protection	Verified_Defense
AbiV	AbiV	AbiV		AbiV	AbiV	TRUE		Population_level_protection	Verified_Defense
AbiZ	AbiZ	AbiZ		AbiZ	AbiZ	TRUE		Population_level_protection	Verified_Defense
Aditi	Aditi	Aditi		Aditi	Aditi	TRUE		Unknown	Verified_Defense
Gao_Ape	Gao_Ape	ApeA		ApeA	ApeA	TRUE		Unknown	Verified_Defense
Avs	Avs_I	AVAST_type_I		AVAST	AVAST type I	TRUE		Population_level_protection	Verified_Defense
Avs	Avs_II	AVAST_type_II		AVAST	AVAST type II	TRUE		Population_level_protection	Verified_Defense
Avs	Avs_III	AVAST_type_III		AVAST	AVAST type III	TRUE		Population_level_protection	Verified_Defense
Avs	Avs_IV	AVAST_type_IV		AVAST	AVAST type IV	TRUE		Population_level_protection	Verified_Defense
Avs	Avs_V	AVAST_type_V		AVAST	AVAST type V	TRUE		Population_level_protection	Verified_Defense
		AVAST_type_I_other		AVAST	AVAST type I other	FALSE		Population_level_protection	Loose_Model_Candidate
Azaca	Azaca	Azaca		Azaca	Azaca	TRUE		Unknown	Verified_Defense
Borvo	Borvo	Borvo		Borvo	Borvo	TRUE		Unknown	Verified_Defense
BREX	BREX			BREX	BREX other	FALSE		Degradation_of_foreign_nucleic_acids	Loose_Model_Candidate
BREX	BREX_I	brex_type_I		BREX	BREX type I	TRUE		Degradation_of_foreign_nucleic_acids	Verified_Defense
BREX	BREX_II	brex_type_II		BREX	BREX type II	TRUE		Degradation_of_foreign_nucleic_acids	Verified_Defense
BREX	BREX_III	brex_type_III		BREX	BREX type III	TRUE		Degradation_of_foreign_nucleic_acids	Verified_Defense
BREX	BREX_IV	brex_type_IV		BREX	BREX type IV	TRUE		Degradation_of_foreign_nucleic_acids	Verified_Defense
BREX	BREX_V	brex_type_V		BREX	BREX type V	TRUE		Degradation_of_foreign_nucleic_acids	Verified_Defense
BREX	BREX_VI	brex_type_VI		BREX	BREX type VI	TRUE		Degradation_of_foreign_nucleic_acids	Verified_Defense
BstA	BstA	BstA		BstA	BstA	TRUE		Unknown	Verified_Defense
Bunzi	Bunzi	Bunzi		Bunzi	Bunzi	TRUE		Unknown	Verified_Defense
Butters_gp30_gp31	Butters_gp30_gp31			Butters gp30-gp31	Butters gp30-gp31	TRUE		Unknown	Verified_Defense
Butters_gp57r	Butters_gp57r			Butters gp57r	Butters gp57r	TRUE		Unknown	Verified_Defense
CapRel	CapRel			CapRel	CapRel	TRUE		Unknown	Verified_Defense
CARD_NLR	CARD_NLR			CARD-NLR	CARD-NLR	TRUE		Unknown	Verified_Defense
CARD_NLR	CARD_NLR_Endonuclease			CARD-NLR	CARD-NLR-Endonuclease	TRUE		Unknown	Verified_Defense
CARD_NLR	CARD_NLR_like			CARD-NLR	CARD-NLR-like	TRUE		Unknown	Verified_Defense
CARD_NLR	CARD_NLR_Phospho			CARD-NLR	CARD-NLR-Phospho	TRUE		Unknown	Verified_Defense
CARD_NLR	CARD_NLR_Subtilase			CARD-NLR	CARD-NLR-Subtilase	TRUE		Unknown	Verified_Defense
CBASS	CBASS_I	cbass_type_I		CBASS	CBASS type I	TRUE		Population_level_protection	Verified_Defense
		cbass_type_IIs		CBASS	CBASS type II	TRUE		Population_level_protection	Verified_Defense
CBASS	CBASS_II	cbass_type_II		CBASS	CBASS type II	TRUE		Population_level_protection	Verified_Defense
CBASS	CBASS_III	cbass_type_III		CBASS	CBASS type III	TRUE		Population_level_protection	Verified_Defense
CBASS	CBASS_IV	cbass_type_IV		CBASS	CBASS type IV	TRUE		Population_level_protection	Verified_Defense
CBASS	CBASS			CBASS	CBASS	TRUE		Population_level_protection	Verified_Defense
		cbass_other		CBASS	CBASS other	FALSE		Population_level_protection	Loose_Model_Candidate
Charlie_gp32	Charlie_gp32			Charlie gp32	Charlie gp32	TRUE		Unknown	Verified_Defense
Cas	CAS_Class1-Type-I			CRISPR-Cas	CRISPR-Cas type I	TRUE		Unknown	Verified_Defense
Cas	CAS_Class1-Subtype-I-A	cas_type_I-A	I-A	CRISPR-Cas	CRISPR-Cas type I	TRUE		Unknown	Verified_Defense
Cas	CAS_Class1-Subtype-I-B	cas_type_I-B1	I-B	CRISPR-Cas	CRISPR-Cas type I	TRUE		Unknown	Verified_Defense
	CAS_Class1-Subtype-I-B	cas_type_I-B2	I-B	CRISPR-Cas	CRISPR-Cas type I	TRUE		Unknown	Verified_Defense
Cas	CAS_Class1-Subtype-I-C	cas_type_I-C	I-C	CRISPR-Cas	CRISPR-Cas type I	TRUE		Unknown	Verified_Defense
Cas	CAS_Class1-Subtype-I-D	cas_type_I-D	I-D	CRISPR-Cas	CRISPR-Cas type I	TRUE		Unknown	Verified_Defense
Cas	CAS_Class1-Subtype-I-E	cas_type_I-E	I-E	CRISPR-Cas	CRISPR-Cas type I	TRUE		Unknown	Verified_Defense
Cas	CAS_Class1-Subtype-I-F	cas_type_I-F1	I-F	CRISPR-Cas	CRISPR-Cas type I	TRUE		Unknown	Verified_Defense
	CAS_Class1-Subtype-I-F	cas_type_I-F2	I-F_T	CRISPR-Cas	CRISPR-Cas type I	TRUE		Unknown	Verified_Defense
	CAS_Class1-Subtype-I-F	cas_type_I-F3	I-F	CRISPR-Cas	CRISPR-Cas type I	TRUE		Unknown	Verified_Defense
Cas	CAS_Class1-Subtype-I-G	cas_type_I-G	I-G	CRISPR-Cas	CRISPR-Cas type I	TRUE		Unknown	Verified_Defense
			Hybrid(I-A,I-B)	CRISPR-Cas	CRISPR-Cas type I	TRUE		Unknown	Verified_Defense
			Hybrid(I-B,I-G)	CRISPR-Cas	CRISPR-Cas type I	TRUE		Unknown	Verified_Defense
			Hybrid(I-F,III-B)	CRISPR-Cas	CRISPR-Cas type I-III	TRUE		Unknown	Verified_Defense
			Hybrid(I-A,III-B)	CRISPR-Cas	CRISPR-Cas type I-III	TRUE		Unknown	Verified_Defense
			Hybrid(I-A,III-D)	CRISPR-Cas	CRISPR-Cas type I-III	TRUE		Unknown	Verified_Defense
			Hybrid(I-B,III-A,III-B)	CRISPR-Cas	CRISPR-Cas type I-III	TRUE		Unknown	Verified_Defense
			Hybrid(I-B,III-D)	CRISPR-Cas	CRISPR-Cas type I-III	TRUE		Unknown	Verified_Defense
			Hybrid(I-B,III-B)	CRISPR-Cas	CRISPR-Cas type I-III	TRUE		Unknown	Verified_Defense
			Hybrid(I-C,III-D)	CRISPR-Cas	CRISPR-Cas type I-III	TRUE		Unknown	Verified_Defense
			Hybrid(I-C,III-B)	CRISPR-Cas	CRISPR-Cas type I-III	TRUE		Unknown	Verified_Defense
			Hybrid(I-A,III-A)	CRISPR-Cas	CRISPR-Cas type I-III	TRUE		Unknown	Verified_Defense
			Hybrid(I-B,III-A)	CRISPR-Cas	CRISPR-Cas type I-III	TRUE		Unknown	Verified_Defense
			Hybrid(I-D,III-B)	CRISPR-Cas	CRISPR-Cas type I-III	TRUE		Unknown	Verified_Defense
			Hybrid(I-F,III-B)	CRISPR-Cas	CRISPR-Cas type I-III	TRUE		Unknown	Verified_Defense
			Hybrid(I-F,III-B)	CRISPR-Cas	CRISPR-Cas type I-III	TRUE		Unknown	Verified_Defense
			Hybrid(I-E,III-D)	CRISPR-Cas	CRISPR-Cas type I-III	TRUE		Unknown	Verified_Defense
			Hybrid(I-B,III-A,III-D)	CRISPR-Cas	CRISPR-Cas type I-III	TRUE		Unknown	Verified_Defense
			Hybrid(I-B,III-C)	CRISPR-Cas	CRISPR-Cas type I-III	TRUE		Unknown	Verified_Defense
Cas	CAS_Class2-Subtype-II-A	cas_type_II-A	II-A	CRISPR-Cas	CRISPR-Cas type II	TRUE		Unknown	Verified_Defense
Cas	CAS_Class2-Subtype-II-B	cas_type_II-B	II-B	CRISPR-Cas	CRISPR-Cas type II	TRUE		Unknown	Verified_Defense
Cas	CAS_Class2-Subtype-II-C	cas_type_II-C	II-C	CRISPR-Cas	CRISPR-Cas type II	TRUE		Unknown	Verified_Defense
			II-C2	CRISPR-Cas	CRISPR-Cas type II	TRUE		Unknown	Verified_Defense
			II-D	CRISPR-Cas	CRISPR-Cas type II	TRUE		Unknown	Verified_Defense
Cas	CAS_Class2-Type-II			CRISPR-Cas	CRISPR-Cas type II	TRUE		Unknown	Verified_Defense
			Hybrid(III-A,III-B)	CRISPR-Cas	CRISPR-Cas type III	TRUE		Unknown	Verified_Defense
Cas	CAS_Class1-Type-III		III-A	CRISPR-Cas	CRISPR-Cas type III	TRUE		Unknown	Verified_Defense
Cas	CAS_Class1-Subtype-III-A	cas_type_III-A	III-A	CRISPR-Cas	CRISPR-Cas type III	TRUE		Unknown	Verified_Defense
Cas	CAS_Class1-Subtype-III-B	cas_type_III-B	III-B	CRISPR-Cas	CRISPR-Cas type III	TRUE		Unknown	Verified_Defense
Cas	CAS_Class1-Subtype-III-C	cas_type_III-C	III-C	CRISPR-Cas	CRISPR-Cas type III	TRUE		Unknown	Verified_Defense
Cas	CAS_Class1-Subtype-III-D	cas_type_III-D	III-D	CRISPR-Cas	CRISPR-Cas type III	TRUE		Unknown	Verified_Defense
Cas	CAS_Class1-Subtype-III-E	cas_type_III-E	III-E	CRISPR-Cas	CRISPR-Cas type III	TRUE		Unknown	Verified_Defense
Cas	CAS_Class1-Subtype-III-F	cas_type_III-F	III-F	CRISPR-Cas	CRISPR-Cas type III	TRUE		Unknown	Verified_Defense
Cas		cas_type_III-G	III-G	CRISPR-Cas	CRISPR-Cas type III	TRUE		Unknown	Verified_Defense
Cas		cas_type_III-H	III-H	CRISPR-Cas	CRISPR-Cas type III	TRUE		Unknown	Verified_Defense
Cas	CAS_Class1-Subtype-IV-A	cas_type_IV-A	IV-A1	CRISPR-Cas	CRISPR-Cas type IV	TRUE		Unknown	Verified_Defense
			IV-A2	CRISPR-Cas	CRISPR-Cas type IV	TRUE		Unknown	Verified_Defense
			IV-A3	CRISPR-Cas	CRISPR-Cas type IV	TRUE		Unknown	Verified_Defense
Cas	CAS_Class1-Subtype-IV-B	cas_type_IV-B	IV-B	CRISPR-Cas	CRISPR-Cas type IV	TRUE		Unknown	Verified_Defense
Cas	CAS_Class1-Subtype-IV-C	cas_type_IV-C	IV-C	CRISPR-Cas	CRISPR-Cas type IV	TRUE		Unknown	Verified_Defense
Cas	CAS_Class1-Subtype-IV-D	cas_type_IV-D	IV-D	CRISPR-Cas	CRISPR-Cas type IV	TRUE		Unknown	Verified_Defense
Cas	CAS_Class1-Subtype-IV-E	cas_type_IV-E	IV-E	CRISPR-Cas	CRISPR-Cas type IV	TRUE		Unknown	Verified_Defense
			Hybrid(I-E,IV-A1)	CRISPR-Cas	CRISPR-Cas type IV	TRUE		Unknown	Verified_Defense
Cas	CAS_Class2-Subtype-V-A	cas_type_V	V-A	CRISPR-Cas	CRISPR-Cas type V	TRUE		Unknown	Verified_Defense
Cas	CAS_Class2-Subtype-V-B	cas_type_V	V-B	CRISPR-Cas	CRISPR-Cas type V	TRUE		Unknown	Verified_Defense
			V-B1	CRISPR-Cas	CRISPR-Cas type V	TRUE		Unknown	Verified_Defense
			V-B2	CRISPR-Cas	CRISPR-Cas type V	TRUE		Unknown	Verified_Defense
Cas	CAS_Class2-Subtype-V-C	cas_type_V	V-C	CRISPR-Cas	CRISPR-Cas type V	TRUE		Unknown	Verified_Defense
Cas	CAS_Class2-Subtype-V-D	cas_type_V	V-D	CRISPR-Cas	CRISPR-Cas type V	TRUE		Unknown	Verified_Defense
Cas	CAS_Class2-Subtype-V-E	cas_type_V	V-E	CRISPR-Cas	CRISPR-Cas type V	TRUE		Unknown	Verified_Defense
			V-F1	CRISPR-Cas	CRISPR-Cas type V	TRUE		Unknown	Verified_Defense
			V-F2	CRISPR-Cas	CRISPR-Cas type V	TRUE		Unknown	Verified_Defense
			V-F3	CRISPR-Cas	CRISPR-Cas type V	TRUE		Unknown	Verified_Defense
Cas	CAS_Class2-Subtype-V-F	cas_type_V	V-F	CRISPR-Cas	CRISPR-Cas type V	TRUE		Unknown	Verified_Defense
Cas	CAS_Class2-Subtype-V-G	cas_type_V	V-G	CRISPR-Cas	CRISPR-Cas type V	TRUE		Unknown	Verified_Defense
Cas	CAS_Class2-Subtype-V-H	cas_type_V	V-H	CRISPR-Cas	CRISPR-Cas type V	TRUE		Unknown	Verified_Defense
Cas	CAS_Class2-Subtype-V-I	cas_type_V	V-I	CRISPR-Cas	CRISPR-Cas type V	TRUE		Unknown	Verified_Defense
Cas	CAS_Class2-Subtype-V-J	cas_type_V	V-J	CRISPR-Cas	CRISPR-Cas type V	TRUE		Unknown	Verified_Defense
Cas	CAS_Class2-Subtype-V-K	cas_type_V-K	V-K	CRISPR-Cas	CRISPR-Cas type V	TRUE		Unknown	Verified_Defense
Cas	CAS_Class2-Subtype-V-L	cas_type_V-L	V-L	CRISPR-Cas	CRISPR-Cas type V	TRUE		Unknown	Verified_Defense
Cas	CAS_Class2-Subtype-V-M	cas_type_V-M	V-M	CRISPR-Cas	CRISPR-Cas type V	TRUE		Unknown	Verified_Defense
Cas	CAS_Class2-Type-V			CRISPR-Cas	CRISPR-Cas type V	TRUE		Unknown	Verified_Defense
Cas	CAS_Class2-Subtype-VI-A		VI-A	CRISPR-Cas	CRISPR-Cas type VI	TRUE		Unknown	Verified_Defense
Cas	CAS_Class2-Subtype-VI-B			CRISPR-Cas	CRISPR-Cas type VI	TRUE		Unknown	Verified_Defense
			VI-B1	CRISPR-Cas	CRISPR-Cas type VI	TRUE		Unknown	Verified_Defense
			VI-B2	CRISPR-Cas	CRISPR-Cas type VI	TRUE		Unknown	Verified_Defense
Cas	CAS_Class2-Subtype-VI-C		VI-C	CRISPR-Cas	CRISPR-Cas type VI	TRUE		Unknown	Verified_Defense
Cas	CAS_Class2-Subtype-VI-D		VI-D	CRISPR-Cas	CRISPR-Cas type VI	TRUE		Unknown	Verified_Defense
Cas	CAS_Class2-Subtype-VI-X		VI-X	CRISPR-Cas	CRISPR-Cas type VI	TRUE		Unknown	Verified_Defense
Cas	CAS_Class2-Subtype-VI-Y		VI-Y	CRISPR-Cas	CRISPR-Cas type VI	TRUE		Unknown	Verified_Defense
Cas	CAS_Class2-Type-VI	cas_type_VI		CRISPR-Cas	CRISPR-Cas type VI	TRUE		Unknown	Verified_Defense
	CAS_Cluster	cas_adaptation		CRISPR-Cas	CRISPR-Cas adaptation	TRUE		Unknown	Verified_Defense
		cas_type_other		CRISPR-Cas	CRISPR-Cas other	FALSE		Unknown	Loose_Model_Candidate
DarTG	DarTG	darTG		DarTG	DarTG	TRUE		Unknown	Verified_Defense
Dazbog	Dazbog	Dazbog		Dazbog	Dazbog	TRUE		Unknown	Verified_Defense
dCTPdeaminase	dCTPdeaminase			dCTPdeaminase	dCTPdeaminase	TRUE		Unknown	Verified_Defense
DmdDE	DdmDE	DdmDE		DdmDE	DdmDE	TRUE		Unknown	Verified_Defense
DdmDE	DdmDE			DdmDE	DdmDE	TRUE		Unknown	Verified_Defense
Detocs	Detocs			Detocs	Detocs	TRUE		Unknown	Verified_Defense
Detocs	Detocs_hydrolase			Detocs	Detocs	TRUE		Unknown	Verified_Defense
Detocs	Detocs_REase			Detocs	Detocs	TRUE		Unknown	Verified_Defense
Detocs	Detocs_TOPRIM			Detocs	Detocs	TRUE		Unknown	Verified_Defense
dGTPase	dGTPase			dGTPase	dGTPase	TRUE		Unknown	Verified_Defense
DISARM	DISARM_1	disarm_type_I		DISARM	DISARM type I	TRUE		Degradation_of_foreign_nucleic_acids	Verified_Defense
DISARM	DISARM_2	disarm_type_II		DISARM	DISARM type II	TRUE		Degradation_of_foreign_nucleic_acids	Verified_Defense
		DMS_other		DMS	DMS other	FALSE		Unknown	Loose_Model_Candidate
Dodola	Dodola	Dodola		Dodola	Dodola	TRUE		Unknown	Verified_Defense
Dpd	Dpd	Dpd		Dpd	Dpd	TRUE		Unknown	Verified_Defense
		DprA-PRTase		DprA-PRTase	DprA-PRTase	TRUE		Unknown	Verified_Defense
AbiA	AbiA_large			DRT	AbiA	TRUE		Unknown	Verified_Defense
AbiA	AbiA_small			DRT	AbiA	TRUE		Unknown	Verified_Defense
AbiK	AbiK			DRT	AbiK	TRUE		Unknown	Verified_Defense
	AbiP2			DRT	AbiP2	TRUE		Unknown	Verified_Defense
		DRT_class_I		DRT	DRT class I	TRUE		Unknown	Verified_Defense
		DRT_class_II		DRT	DRT class II	TRUE		Unknown	Verified_Defense
		DRT_class_III		DRT	DRT class III	TRUE		Unknown	Verified_Defense
DRT	DRT_1	DRT_type_I		DRT	DRT type 1	TRUE		Unknown	Verified_Defense
DRT	DRT_2	DRT_type_II		DRT	DRT type 2	TRUE		Unknown	Verified_Defense
DRT	DRT_3	DRT_type_III		DRT	DRT type 3	TRUE		Unknown	Verified_Defense
DRT	DRT_4	DRT_type_IV		DRT	DRT type 4	TRUE		Unknown	Verified_Defense
DRT	DRT_5	DRT_type_V		DRT	DRT type 5	TRUE		Unknown	Verified_Defense
DRT	DRT6			DRT	DRT type 6	TRUE		Unknown	Verified_Defense
DRT	DRT7			DRT	DRT type 7	TRUE		Unknown	Verified_Defense
DRT	DRT8			DRT	DRT type 8	TRUE		Unknown	Verified_Defense
DRT	DRT9			DRT	DRT type 9	TRUE		Unknown	Verified_Defense
Rst_RT-nitrilase-Tm	Rst_RT-Tm			DRT	UG5	TRUE		Unknown	Verified_Defense
		DRT_other		DRT	DRT other	FALSE		Unknown	Loose_Model_Candidate
Druantia	Druantia_I	druantia_type_I		Druantia	Druantia type I	TRUE		Unknown	Verified_Defense
Druantia	Druantia_II	druantia_type_II		Druantia	Druantia type II	TRUE		Unknown	Verified_Defense
Druantia	Druantia_III	druantia_type_III		Druantia	Druantia type III	TRUE		Unknown	Verified_Defense
Druantia	Druantia_IV	druantia_type_IV		Druantia	Druantia type IV	TRUE		Unknown	Verified_Defense
		druantia_other		Druantia	Druantia other	FALSE		Unknown	Loose_Model_Candidate
Dsr	Dsr_I	dsr1		Dsr	Dsr1	TRUE		Population_level_protection	Verified_Defense
Dsr	Dsr_II	dsr2		Dsr	Dsr2	TRUE		Population_level_protection	Verified_Defense
Rst_DUF4238	Rst_DUF4238	DUF4238		DUF4238	DUF4238	TRUE		Unknown	Verified_Defense
		dXTPase		dXTPase	dXTPase	FALSE		Inhibition_of_DNA_and_RNA_synthesis	Loose_Model_Candidate
Dynamins	Dynamins	Dynamins		Dynamins	Dynamins	TRUE		Unknown	Verified_Defense
Eleos	Eleos			Eleos	Eleos	TRUE		Unknown	Verified_Defense
Gabija	Gabija	gabija		Gabija	Gabija	TRUE		Degradation_of_foreign_nucleic_acids	Verified_Defense
GAPS1	GAPS1			GAPS1	GAPS1	TRUE		Unknown	Verified_Defense
GAPS2	GAPS2			GAPS2	GAPS2	TRUE		Unknown	Verified_Defense
GAPS4	GAPS4			GAPS4	GAPS4	TRUE		Unknown	Verified_Defense
GAPS6	GAPS6			GAPS6	GAPS6	TRUE		Unknown	Verified_Defense
GasderMIN	GasderMIN	gasdermin		Gasdermin	Gasdermin	TRUE		Population_level_protection	Verified_Defense
FS_GIY_YIG	FS_GIY_YIG			GIY-YIG	GIY-YIG	TRUE		Unknown	Verified_Defense
Rst_gop_beta_cll	Rst_gop_beta_cll	gop_beta_cll		gop-beta-cll	gop-beta-cll	TRUE		Unknown	Verified_Defense
		hachiman_type_I		Hachiman	Hachiman type I	TRUE		Unknown	Verified_Defense
Hachiman	Hachiman_II	hachiman_type_II		Hachiman	Hachiman type II	TRUE		Unknown	Verified_Defense
Hachiman	Hachiman			Hachiman	Hachiman	TRUE		Unknown	Verified_Defense
		hachiman_other		Hachiman	Hachiman other	FALSE		Unknown	Loose_Model_Candidate
HEC-01	HEC-01	HEC-01		HEC-01	HEC-01	FALSE		Unknown	Hma_Embedded_Candidate
HEC-02	HEC-02	HEC-02		HEC-02	HEC-02	TRUE		Unknown	Verified_Defense
HEC-03	HEC-03	HEC-03		HEC-03	HEC-03	TRUE		Unknown	Verified_Defense
HEC-04	HEC-04	HEC-04		HEC-04	HEC-04	TRUE		Unknown	Verified_Defense
HEC-05	HEC-05	HEC-05		HEC-05	HEC-05	TRUE		Unknown	Verified_Defense
HEC-06	HEC-06	HEC-06		HEC-06	HEC-06	TRUE		Unknown	Verified_Defense
HEC-07	HEC-07	HEC-07		HEC-07	HEC-07	TRUE		Unknown	Verified_Defense
HEC-08	HEC-08	HEC-08		HEC-08	HEC-08	TRUE		Unknown	Verified_Defense
HEC-09	HEC-09	HEC-09		HEC-09	HEC-09	FALSE		Unknown	Hma_Embedded_Candidate
Rst_HelicaseDUF2290	Rst_HelicaseDUF2290	Helicase-DUF2290		Helicase-DUF2290	Helicase-DUF2291	TRUE		Unknown	Verified_Defense
Gao_Her	Gao_Her_DUF	GAO_20		Her-DUF	Her-DUF	TRUE		Unknown	Verified_Defense
Gao_Her	Gao_Her_SIR	GAO_19		Her-SIR	Her-SIR	TRUE		Unknown	Verified_Defense
Gao_Hhe	Gao_Hhe	hhe		Hhe	Hhe	TRUE		Unknown	Verified_Defense
Hma	Hma	hma		Hma	Hma	TRUE		Unknown	Verified_Defense
Hna	Hna			Hna	Hna	TRUE		Unknown	Verified_Defense
FS_HP	FS_HP			HP	HP	TRUE		Unknown	Verified_Defense
FS_HP_SDH_sah	FS_HP_SDH_sah			HP-SDH	HP-SDH	TRUE		Unknown	Verified_Defense
FS_HsdR_like	FS_HsdR_like			HsdR-like	HsdR-like	TRUE		Unknown	Verified_Defense
Rst_Hydrolase-3Tm	Rst_Hydrolase-Tm	Hydrolase-TM		Hydrolase-TM	Hydrolase-TM	TRUE		Unknown	Verified_Defense
Gao_Iet	Gao_Iet	ietAS		IetAS	IetAS	TRUE		Unknown	Verified_Defense
ISG15-like	ISG15-like	ISG15-like		ISG15-like	ISG15-like	TRUE		Unknown	Verified_Defense
		ISG15-like_other		ISG15-like	ISG15-like other	FALSE		Unknown	Loose_Model_Candidate
JukAB	JukAB	Juk		JukAB	JukAB	TRUE		Unknown	Verified_Defense
Kiwa	Kiwa	kiwa		Kiwa	Kiwa	TRUE		Degradation_of_foreign_nucleic_acids	Verified_Defense
Lamassu-Fam	Lamassu-Fam	Lamassu_Family		Lamassu	Lamassu family	TRUE		Population_level_protection	Verified_Defense
		lamassu_other		Lamassu	Lamassu other	FALSE		Population_level_protection	Loose_Model_Candidate
Lamassu-Fam	Lamassu-Amidase	Lamassu-Amidase		Lamassu	Lamassu Amidase	TRUE		Population_level_protection	Verified_Defense
Lamassu-Fam	Lamassu-Cap4_nuclease	Lamassu-Cap4_nuclease		Lamassu	Lamassu Cap4-nuclease	TRUE		Population_level_protection	Verified_Defense
Lamassu-Fam	Lamassu-FMO	Lamassu-FMO		Lamassu	Lamassu FMO	TRUE		Population_level_protection	Verified_Defense
Lamassu-Fam	Lamassu-Hydrolase	Lamassu-Hydrolase		Lamassu	Lamassu Hydrolase	TRUE		Population_level_protection	Verified_Defense
Lamassu-Fam	Lamassu-Hydrolase_Protease	Lamassu-Hydrolase_Protease		Lamassu	Lamassu Hydrolase-Protease	TRUE		Population_level_protection	Verified_Defense
Lamassu-Fam	Lamassu-Hypothetical	Lamassu-Hypothetical		Lamassu	Lamassu Hypothetical	TRUE		Population_level_protection	Verified_Defense
Lamassu-Fam	Lamassu-Lipase	Lamassu-Lipase		Lamassu	Lamassu Lipase	TRUE		Population_level_protection	Verified_Defense
Lamassu-Fam	Lamassu-Mrr	Lamassu-Mrr		Lamassu	Lamassu Mrr	TRUE		Population_level_protection	Verified_Defense
Lamassu-Fam	Lamassu-PDDEXK	Lamassu-PDDEXK		Lamassu	Lamassu PDDEXK	TRUE		Population_level_protection	Verified_Defense
Lamassu-Fam	Lamassu-Protease	Lamassu-Protease		Lamassu	Lamassu Protease	TRUE		Population_level_protection	Verified_Defense
Lamassu-Fam	Lamassu-Sir2	Lamassu-Sir2		Lamassu	Lamassu Sir2	TRUE		Population_level_protection	Verified_Defense
		lamassu_type_I		Lamassu	Lamassu type I	TRUE		Population_level_protection	Verified_Defense
		lamassu_type_II		Lamassu	Lamassu type II	TRUE		Population_level_protection	Verified_Defense
Lit	Lit	Lit		Lit	Lit	TRUE		Unknown	Verified_Defense
MADS	MADS	mads		MADS	MADS	TRUE		Unknown	Verified_Defense
MazEF	MazEF			MazEF	MazEF	TRUE		Unknown	Verified_Defense
Menshen	Menshen	Menshen		Menshen	Menshen	TRUE		Unknown	Verified_Defense
		Menshen_other		Menshen	Menshen other	FALSE		Unknown	Loose_Model_Candidate
MMB_gp29_gp30	MMB_gp29_gp30			MMB gp29-gp30	MMB gp29-gp30	TRUE		Unknown	Verified_Defense
Mok_Hok_Sok	Mok_Hok_Sok			Hok/Sok	Hok/Sok	TRUE		Unknown	Verified_Defense
Mokosh	Mokosh_TypeI	Mokosh_TypeI		Mokosh	Mokosh type I	TRUE		Unknown	Verified_Defense
Mokosh	Mokosh_Type_I			Mokosh	Mokosh type I	TRUE		Unknown	Verified_Defense
Mokosh	Mokosh_Type_I_A			Mokosh	Mokosh type I	TRUE		Unknown	Verified_Defense
Mokosh	Mokosh_Type_I_B			Mokosh	Mokosh type I	TRUE		Unknown	Verified_Defense
Mokosh	Mokosh_Type_I_C			Mokosh	Mokosh type I	TRUE		Unknown	Verified_Defense
Mokosh	Mokosh_Type_I_D			Mokosh	Mokosh type I	TRUE		Unknown	Verified_Defense
Mokosh	Mokosh_Type_I_E			Mokosh	Mokosh type I	TRUE		Unknown	Verified_Defense
Mokosh	Mokosh_TypeII	Mokosh_TypeII		Mokosh	Mokosh type II	TRUE		Unknown	Verified_Defense
MqsRAC	MqsRAC			MqsRAC	MqsRAC	TRUE		Unknown	Verified_Defense
Gao_Mza	Gao_Mza	mza		Mza	Mza	TRUE		Unknown	Verified_Defense
		mza_other		Mza	Mza other	FALSE		Unknown	Loose_Model_Candidate
NixI	NixI			NixI	NixI	TRUE		Unknown	Verified_Defense
NLR	NLR_like_bNACHT01			NLR	NLR_like	TRUE		Unknown	Verified_Defense
NLR	NLR_like_bNACHT09			NLR	NLR_like	TRUE		Unknown	Verified_Defense
Old_exonuclease	Old_exonuclease	Old		Old	Old	TRUE		Unknown	Verified_Defense
Olokun	Olokun	Olokun		Olokun	Olokun	TRUE		Unknown	Verified_Defense
pAgo	pAgo			pAgo	pAgo	TRUE		Degradation_of_foreign_nucleic_acids	Verified_Defense
		argonaute_other		pAgo	pAgo other	FALSE		Degradation_of_foreign_nucleic_acids	Loose_Model_Candidate
		argonaute_solo		pAgo	pAgo	TRUE		Degradation_of_foreign_nucleic_acids	Verified_Defense
		argonaute_type_I		pAgo	pAgo type I	TRUE		Degradation_of_foreign_nucleic_acids	Verified_Defense
		argonaute_type_II		pAgo	pAgo type II	TRUE		Degradation_of_foreign_nucleic_acids	Verified_Defense
		argonaute_type_III		pAgo	pAgo type III	TRUE		Degradation_of_foreign_nucleic_acids	Verified_Defense
		argonaute_type_SiAgo		pAgo	pAgo type IV	TRUE		Degradation_of_foreign_nucleic_acids	Verified_Defense
pAgo	pAgo_LongA			pAgo	pAgo LongA	TRUE		Degradation_of_foreign_nucleic_acids	Verified_Defense
pAgo	pAgo_LongB			pAgo	pAgo LongB	TRUE		Degradation_of_foreign_nucleic_acids	Verified_Defense
pAgo	pAgo_S1A			pAgo	pAgo S1A	TRUE		Degradation_of_foreign_nucleic_acids	Verified_Defense
pAgo	pAgo_S1B			pAgo	pAgo S1B	TRUE		Degradation_of_foreign_nucleic_acids	Verified_Defense
pAgo	pAgo_S2B			pAgo	pAgo S2B	TRUE		Degradation_of_foreign_nucleic_acids	Verified_Defense
pAgo	pAgo_SPARTA			pAgo	pAgo SPARTA	TRUE		Degradation_of_foreign_nucleic_acids	Verified_Defense
Panchino_gp28	Panchino_gp28			Panchino gp28	Panchino gp28	TRUE		Unknown	Verified_Defense
Paris	PARIS_I	Paris		PARIS	PARIS type I	TRUE		Unknown	Verified_Defense
Paris	PARIS_I_merge			PARIS	PARIS type I	TRUE		Unknown	Verified_Defense
Paris	PARIS_II	Paris_fused		PARIS	PARIS type II	TRUE		Unknown	Verified_Defense
Paris	PARIS_II_merge			PARIS	PARIS type II	TRUE		Unknown	Verified_Defense
PD-Lambda-1	PD-Lambda-1	PD-Lambda-1		PD-Lambda-1	PD-Lambda-1	TRUE		Unknown	Verified_Defense
PD-Lambda-2	PD-Lambda-2	PD-Lambda-2		PD-Lambda-2	PD-Lambda-2	TRUE		Unknown	Verified_Defense
PD-Lambda-3	PD-Lambda-3	PD-Lambda-3		PD-Lambda-3	PD-Lambda-3	TRUE		Unknown	Verified_Defense
PD-Lambda-4	PD-Lambda-4	PD-Lambda-4		PD-Lambda-4	PD-Lambda-4	TRUE		Unknown	Verified_Defense
PD-Lambda-5	PD-Lambda-5	PD-Lambda-5		PD-Lambda-5	PD-Lambda-5	TRUE		Unknown	Verified_Defense
PD-Lambda-6	PD-Lambda-6	PD-Lambda-6		PD-Lambda-6	PD-Lambda-6	TRUE		Unknown	Verified_Defense
PD-T4-1	PD-T4-1	PD-T4-1		PD-T4-1	PD-T4-1	TRUE		Unknown	Verified_Defense
		PD-T7-1or5		PD-T7-1/5	PD-T7-1/5	FALSE		Unknown	Loose_Model_Candidate
PD-T4-10	PD-T4-10	PD-T4-10		PD-T4-10	PD-T4-10	TRUE		Unknown	Verified_Defense
PD-T4-2	PD-T4-2	PD-T4-2		PD-T4-2	PD-T4-2	TRUE		Unknown	Verified_Defense
PD-T4-3	PD-T4-3	PD-T4-3		PD-T4-3	PD-T4-3	TRUE		Unknown	Verified_Defense
PD-T4-4	PD-T4-4	PD-T4-4		PD-T4-4	PD-T4-4	TRUE		Unknown	Verified_Defense
PD-T4-5	PD-T4-5	PD-T4-5		PD-T4-5	PD-T4-5	TRUE		Unknown	Verified_Defense
PD-T4-6	PD-T4-6	PD-T4-6		PD-T4-6	PD-T4-6	TRUE		Unknown	Verified_Defense
PD-T4-7	PD-T4-7	PD-T4-7		PD-T4-7	PD-T4-7	TRUE		Unknown	Verified_Defense
PD-T4-8	PD-T4-8			PD-T4-8	PD-T4-8	TRUE		Unknown	Verified_Defense
PD-T4-9	PD-T4-9	PD-T4-9		PD-T4-9	PD-T4-9	TRUE		Unknown	Verified_Defense
PD-T7-1	PD-T7-1			PD-T7-1	PD-T7-1	TRUE		Unknown	Verified_Defense
PD-T7-2	PD-T7-2			Her-SIR	Her-SIR	TRUE	PD-T7-2 == Her-SIR	Unknown	Verified_Defense
PD-T7-3	PD-T7-3	PD-T7-3		PD-T7-3	PD-T7-3	TRUE		Unknown	Verified_Defense
PD-T7-4	PD-T7-4	PD-T7-4		PD-T7-4	PD-T7-4	TRUE		Unknown	Verified_Defense
PD-T7-5	PD-T7-5			PD-T7-5	PD-T7-5	TRUE		Unknown	Verified_Defense
		PDC-M01		PDC-M01	PDC-M01	FALSE		Unknown	Phage_Defense_Candidate
		PDC-M02		PDC-M02	PDC-M02	FALSE		Unknown	Phage_Defense_Candidate
		PDC-M03		PDC-M03	PDC-M03	FALSE		Unknown	Phage_Defense_Candidate
		PDC-M04		PDC-M04	PDC-M04	FALSE		Unknown	Phage_Defense_Candidate
		PDC-M05		PDC-M05	PDC-M05	FALSE		Unknown	Phage_Defense_Candidate
		PDC-M06		PDC-M06	PDC-M06	FALSE		Unknown	Phage_Defense_Candidate
		PDC-M07		PDC-M07	PDC-M07	FALSE		Unknown	Phage_Defense_Candidate
		PDC-M08		PDC-M08	PDC-M08	FALSE		Unknown	Phage_Defense_Candidate
		PDC-M09		PDC-M09	PDC-M09	FALSE		Unknown	Phage_Defense_Candidate
		PDC-M10		PDC-M10	PDC-M10	FALSE		Unknown	Phage_Defense_Candidate
		PDC-M11		PDC-M11	PDC-M11	FALSE		Unknown	Phage_Defense_Candidate
		PDC-M12		PDC-M12	PDC-M12	FALSE		Unknown	Phage_Defense_Candidate
		PDC-M13		PDC-M13	PDC-M13	FALSE		Unknown	Phage_Defense_Candidate
		PDC-M14		PDC-M14	PDC-M14	FALSE		Unknown	Phage_Defense_Candidate
		PDC-M15		PDC-M15	PDC-M15	FALSE		Unknown	Phage_Defense_Candidate
		PDC-M16		PDC-M16	PDC-M16	FALSE		Unknown	Phage_Defense_Candidate
		PDC-M17		PDC-M17	PDC-M17	FALSE		Unknown	Phage_Defense_Candidate
		PDC-M18		PDC-M18	PDC-M18	FALSE		Unknown	Phage_Defense_Candidate
		PDC-M19		PDC-M19	PDC-M19	FALSE		Unknown	Phage_Defense_Candidate
		PDC-M20		PDC-M20	PDC-M20	FALSE		Unknown	Phage_Defense_Candidate
		PDC-M21		PDC-M21	PDC-M21	FALSE		Unknown	Phage_Defense_Candidate
		PDC-M22		PDC-M22	PDC-M22	FALSE		Unknown	Phage_Defense_Candidate
		PDC-M23		PDC-M23	PDC-M23	FALSE		Unknown	Phage_Defense_Candidate
		PDC-M24		PDC-M24	PDC-M24	FALSE		Unknown	Phage_Defense_Candidate
		PDC-M25		PDC-M25	PDC-M25	FALSE		Unknown	Phage_Defense_Candidate
		PDC-M26		PDC-M26	PDC-M26	FALSE		Unknown	Phage_Defense_Candidate
		PDC-M27		PDC-M27	PDC-M27	FALSE		Unknown	Phage_Defense_Candidate
		PDC-M28		PDC-M28	PDC-M28	FALSE		Unknown	Phage_Defense_Candidate
		PDC-M29		PDC-M29	PDC-M29	FALSE		Unknown	Phage_Defense_Candidate
		PDC-M30		PDC-M30	PDC-M30	FALSE		Unknown	Phage_Defense_Candidate
		PDC-M31		PDC-M31	PDC-M31	FALSE		Unknown	Phage_Defense_Candidate
		PDC-M32		PDC-M32	PDC-M32	FALSE		Unknown	Phage_Defense_Candidate
		PDC-M33		PDC-M33	PDC-M33	FALSE		Unknown	Phage_Defense_Candidate
		PDC-M34		PDC-M34	PDC-M34	FALSE		Unknown	Phage_Defense_Candidate
		PDC-M35		PDC-M35	PDC-M35	FALSE		Unknown	Phage_Defense_Candidate
		PDC-M36		PDC-M36	PDC-M36	FALSE		Unknown	Phage_Defense_Candidate
		PDC-M37		PDC-M37	PDC-M37	FALSE		Unknown	Phage_Defense_Candidate
		PDC-M38		PDC-M38	PDC-M38	FALSE		Unknown	Phage_Defense_Candidate
		PDC-M39		PDC-M39	PDC-M39	FALSE		Unknown	Phage_Defense_Candidate
		PDC-M40		PDC-M40	PDC-M40	FALSE		Unknown	Phage_Defense_Candidate
		PDC-M41		PDC-M41	PDC-M41	FALSE		Unknown	Phage_Defense_Candidate
		PDC-M42		PDC-M42	PDC-M42	FALSE		Unknown	Phage_Defense_Candidate
		PDC-M43		PDC-M43	PDC-M43	FALSE		Unknown	Phage_Defense_Candidate
		PDC-M44		PDC-M44	PDC-M44	FALSE		Unknown	Phage_Defense_Candidate
		PDC-M45		PDC-M45	PDC-M45	FALSE		Unknown	Phage_Defense_Candidate
		PDC-M46		PDC-M46	PDC-M46	FALSE		Unknown	Phage_Defense_Candidate
		PDC-M47		PDC-M47	PDC-M47	FALSE		Unknown	Phage_Defense_Candidate
		PDC-M48		PDC-M48	PDC-M48	FALSE		Unknown	Phage_Defense_Candidate
		PDC-M49		PDC-M49	PDC-M49	FALSE		Unknown	Phage_Defense_Candidate
		PDC-M50		PDC-M50	PDC-M50	FALSE		Unknown	Phage_Defense_Candidate
		PDC-M51		PDC-M51	PDC-M51	FALSE		Unknown	Phage_Defense_Candidate
		PDC-M52		PDC-M52	PDC-M52	FALSE		Unknown	Phage_Defense_Candidate
		PDC-M53		PDC-M53	PDC-M53	FALSE		Unknown	Phage_Defense_Candidate
		PDC-M54		PDC-M54	PDC-M54	FALSE		Unknown	Phage_Defense_Candidate
		PDC-M55		PDC-M55	PDC-M55	FALSE		Unknown	Phage_Defense_Candidate
		PDC-M56		PDC-M56	PDC-M56	FALSE		Unknown	Phage_Defense_Candidate
		PDC-M57		PDC-M57	PDC-M57	FALSE		Unknown	Phage_Defense_Candidate
		PDC-M58		PDC-M58	PDC-M58	FALSE		Unknown	Phage_Defense_Candidate
		PDC-M59		PDC-M59	PDC-M59	FALSE		Unknown	Phage_Defense_Candidate
		PDC-M60		PDC-M60	PDC-M60	FALSE		Unknown	Phage_Defense_Candidate
		PDC-M61		PDC-M61	PDC-M61	FALSE		Unknown	Phage_Defense_Candidate
		PDC-M62		PDC-M62	PDC-M62	FALSE		Unknown	Phage_Defense_Candidate
		PDC-M63		PDC-M63	PDC-M63	FALSE		Unknown	Phage_Defense_Candidate
		PDC-M64		PDC-M64	PDC-M64	FALSE		Unknown	Phage_Defense_Candidate
		PDC-M65		PDC-M65	PDC-M65	FALSE		Unknown	Phage_Defense_Candidate
		PDC-M66		PDC-M66	PDC-M66	FALSE		Unknown	Phage_Defense_Candidate
		PDC-M67		PDC-M67	PDC-M67	FALSE		Unknown	Phage_Defense_Candidate
		PDC-M68		PDC-M68	PDC-M68	FALSE		Unknown	Phage_Defense_Candidate
		PDC-M69		PDC-M69	PDC-M69	FALSE		Unknown	Phage_Defense_Candidate
		PDC-M70		PDC-M70	PDC-M70	FALSE		Unknown	Phage_Defense_Candidate
		PDC-M71		PDC-M71	PDC-M71	FALSE		Unknown	Phage_Defense_Candidate
		PDC-M72		PDC-M72	PDC-M72	FALSE		Unknown	Phage_Defense_Candidate
		PDC-S01		PDC-S01	PDC-S01	FALSE		Unknown	Phage_Defense_Candidate
		PDC-S02		PDC-S02	PDC-S02	FALSE		Unknown	Phage_Defense_Candidate
		PDC-S03		PDC-S03	PDC-S03	FALSE		Unknown	Phage_Defense_Candidate
		PDC-S04		PDC-S04	PDC-S04	FALSE		Unknown	Phage_Defense_Candidate
		PDC-S05		PDC-S05	PDC-S05	FALSE		Unknown	Phage_Defense_Candidate
		PDC-S06		PDC-S06	PDC-S06	FALSE		Unknown	Phage_Defense_Candidate
		PDC-S07		PDC-S07	PDC-S07	FALSE		Unknown	Phage_Defense_Candidate
		PDC-S08		PDC-S08	PDC-S08	FALSE		Unknown	Phage_Defense_Candidate
		PDC-S09		PDC-S09	PDC-S09	FALSE		Unknown	Phage_Defense_Candidate
		PDC-S10		PDC-S10	PDC-S10	FALSE		Unknown	Phage_Defense_Candidate
		PDC-S11		PDC-S11	PDC-S11	FALSE		Unknown	Phage_Defense_Candidate
		PDC-S12		PDC-S12	PDC-S12	FALSE		Unknown	Phage_Defense_Candidate
		PDC-S13		PDC-S13	PDC-S13	FALSE		Unknown	Phage_Defense_Candidate
		PDC-S14		PDC-S14	PDC-S14	FALSE		Unknown	Phage_Defense_Candidate
		PDC-S15		PDC-S15	PDC-S15	FALSE		Unknown	Phage_Defense_Candidate
		PDC-S16		PDC-S16	PDC-S16	FALSE		Unknown	Phage_Defense_Candidate
		PDC-S17		PDC-S17	PDC-S17	FALSE		Unknown	Phage_Defense_Candidate
		PDC-S18		PDC-S18	PDC-S18	FALSE		Unknown	Phage_Defense_Candidate
		PDC-S19		PDC-S19	PDC-S19	FALSE		Unknown	Phage_Defense_Candidate
		PDC-S20		PDC-S20	PDC-S20	FALSE		Unknown	Phage_Defense_Candidate
		PDC-S21		PDC-S21	PDC-S21	FALSE		Unknown	Phage_Defense_Candidate
		PDC-S22		PDC-S22	PDC-S22	FALSE		Unknown	Phage_Defense_Candidate
		PDC-S23		PDC-S23	PDC-S23	FALSE		Unknown	Phage_Defense_Candidate
		PDC-S24		PDC-S24	PDC-S24	FALSE		Unknown	Phage_Defense_Candidate
		PDC-S25		PDC-S25	PDC-S25	FALSE		Unknown	Phage_Defense_Candidate
		PDC-S26		PDC-S26	PDC-S26	FALSE		Unknown	Phage_Defense_Candidate
		PDC-S27		PDC-S27	PDC-S27	FALSE		Unknown	Phage_Defense_Candidate
		PDC-S28		PDC-S28	PDC-S28	FALSE		Unknown	Phage_Defense_Candidate
		PDC-S29		PDC-S29	PDC-S29	FALSE		Unknown	Phage_Defense_Candidate
		PDC-S30		PDC-S30	PDC-S30	FALSE		Unknown	Phage_Defense_Candidate
		PDC-S31		PDC-S31	PDC-S31	FALSE		Unknown	Phage_Defense_Candidate
		PDC-S32		PDC-S32	PDC-S32	FALSE		Unknown	Phage_Defense_Candidate
		PDC-S33		PDC-S33	PDC-S33	FALSE		Unknown	Phage_Defense_Candidate
		PDC-S34		PDC-S34	PDC-S34	FALSE		Unknown	Phage_Defense_Candidate
		PDC-S35		PDC-S35	PDC-S35	FALSE		Unknown	Phage_Defense_Candidate
		PDC-S36		PDC-S36	PDC-S36	FALSE		Unknown	Phage_Defense_Candidate
		PDC-S37		PDC-S37	PDC-S37	FALSE		Unknown	Phage_Defense_Candidate
		PDC-S38		PDC-S38	PDC-S38	FALSE		Unknown	Phage_Defense_Candidate
		PDC-S39		PDC-S39	PDC-S39	FALSE		Unknown	Phage_Defense_Candidate
		PDC-S40		PDC-S40	PDC-S40	FALSE		Unknown	Phage_Defense_Candidate
		PDC-S41		PDC-S41	PDC-S41	FALSE		Unknown	Phage_Defense_Candidate
		PDC-S42		PDC-S42	PDC-S42	FALSE		Unknown	Phage_Defense_Candidate
		PDC-S43		PDC-S43	PDC-S43	FALSE		Unknown	Phage_Defense_Candidate
		PDC-S44		PDC-S44	PDC-S44	FALSE		Unknown	Phage_Defense_Candidate
		PDC-S45		PDC-S45	PDC-S45	FALSE		Unknown	Phage_Defense_Candidate
		PDC-S46		PDC-S46	PDC-S46	FALSE		Unknown	Phage_Defense_Candidate
		PDC-S47		PDC-S47	PDC-S47	FALSE		Unknown	Phage_Defense_Candidate
		PDC-S48		PDC-S48	PDC-S48	FALSE		Unknown	Phage_Defense_Candidate
		PDC-S49		PDC-S49	PDC-S49	FALSE		Unknown	Phage_Defense_Candidate
		PDC-S50		PDC-S50	PDC-S50	FALSE		Unknown	Phage_Defense_Candidate
		PDC-S51		PDC-S51	PDC-S51	FALSE		Unknown	Phage_Defense_Candidate
		PDC-S52		PDC-S52	PDC-S52	FALSE		Unknown	Phage_Defense_Candidate
		PDC-S53		PDC-S53	PDC-S53	FALSE		Unknown	Phage_Defense_Candidate
		PDC-S54		PDC-S54	PDC-S54	FALSE		Unknown	Phage_Defense_Candidate
		PDC-S55		PDC-S55	PDC-S55	FALSE		Unknown	Phage_Defense_Candidate
		PDC-S56		PDC-S56	PDC-S56	FALSE		Unknown	Phage_Defense_Candidate
		PDC-S57		PDC-S57	PDC-S57	FALSE		Unknown	Phage_Defense_Candidate
		PDC-S58		PDC-S58	PDC-S58	FALSE		Unknown	Phage_Defense_Candidate
		PDC-S59		PDC-S59	PDC-S59	FALSE		Unknown	Phage_Defense_Candidate
		PDC-S60		PDC-S60	PDC-S60	FALSE		Unknown	Phage_Defense_Candidate
		PDC-S61		PDC-S61	PDC-S61	FALSE		Unknown	Phage_Defense_Candidate
		PDC-S62		PDC-S62	PDC-S62	FALSE		Unknown	Phage_Defense_Candidate
		PDC-S63		PDC-S63	PDC-S63	FALSE		Unknown	Phage_Defense_Candidate
		PDC-S64		PDC-S64	PDC-S64	FALSE		Unknown	Phage_Defense_Candidate
		PDC-S65		PDC-S65	PDC-S65	FALSE		Unknown	Phage_Defense_Candidate
		PDC-S66		PDC-S66	PDC-S66	FALSE		Unknown	Phage_Defense_Candidate
		PDC-S67		PDC-S67	PDC-S67	FALSE		Unknown	Phage_Defense_Candidate
		PDC-S68		PDC-S68	PDC-S68	FALSE		Unknown	Phage_Defense_Candidate
		PDC-S69		PDC-S69	PDC-S69	FALSE		Unknown	Phage_Defense_Candidate
		PDC-S70		PDC-S70	PDC-S70	FALSE		Unknown	Phage_Defense_Candidate
		PDC-S71		PDC-S71	PDC-S71	FALSE		Unknown	Phage_Defense_Candidate
		PDC-S72		PDC-S72	PDC-S72	FALSE		Unknown	Phage_Defense_Candidate
		PDC-S73		PDC-S73	PDC-S73	FALSE		Unknown	Phage_Defense_Candidate
PfiAT	PfiAT			PfiAT	PfiAT	TRUE		Unknown	Verified_Defense
Phrann_gp29_gp30	Phrann_gp29_gp30			Phrann gp29-gp30	Phrann gp29-gp30	TRUE		Unknown	Verified_Defense
		PifA		PifA	PifA	FALSE		Unknown	Loose_Model_Candidate
Pif	Pif			PifAC	PifAC	TRUE		Unknown	Verified_Defense
Gao_Ppl	Gao_Ppl	ppl		Ppl	Ppl	TRUE		Unknown	Verified_Defense
PrrC	PrrC	PrrC		PrrC	PrrC	TRUE		Unknown	Verified_Defense
PsyrTA	PsyrTA	PsyrTA		PsyrTA	PsyrTA	TRUE		Unknown	Verified_Defense
Dnd	Dnd_ABCDE	PT_DndABCDE		PT	DndABCDE	TRUE		Degradation_of_foreign_nucleic_acids	Verified_Defense
Dnd	Dnd_ABCDEFGH	PT_DndFGH		PT	DndFGH	TRUE		Degradation_of_foreign_nucleic_acids	Verified_Defense
		PT_PbeABCD		PT	PbeABCD	TRUE		Degradation_of_foreign_nucleic_acids	Verified_Defense
SspBCDE	SspBCDE	PT_SspABCD		PT	SspABCD	TRUE		Degradation_of_foreign_nucleic_acids	Verified_Defense
SspBCDE	SspBCDE	PT_SspE		PT	SspE	TRUE		Degradation_of_foreign_nucleic_acids	Verified_Defense
		PT_SspFGH		PT	SspFGH	TRUE		Degradation_of_foreign_nucleic_acids	Verified_Defense
		pycsar_effector		Pycsar	Pycsar	TRUE		Population_level_protection	Verified_Defense
		pycsar_unknown		Pycsar	Pycsar	TRUE		Population_level_protection	Verified_Defense
Pycsar	Pycsar			Pycsar	Pycsar	TRUE		Population_level_protection	Verified_Defense
		pycsar_other		Pycsar	Pycsar other	FALSE		Population_level_protection	Loose_Model_Candidate
Gao_Qat	Gao_Qat	qatABCD		QatABCD	QatABCD	TRUE		Unknown	Verified_Defense
		qatABCD_other		QatABCD	QatABCD other	FALSE		Unknown	Loose_Model_Candidate
RADAR	radar_I			RADAR	RADAR	TRUE		Inhibition_of_DNA_and_RNA_synthesis	Verified_Defense
RADAR	radar_II	RADAR		RADAR	RADAR	TRUE		Inhibition_of_DNA_and_RNA_synthesis	Verified_Defense
		retron_Ec107-like		Retron	Retron Ec107-like	TRUE		Population_level_protection	Verified_Defense
		retron_outgroup		Retron	Retron outgroup	TRUE		Population_level_protection	Verified_Defense
Retron	Retron_I_A	retron_I-A		Retron	Retron type I	TRUE		Population_level_protection	Verified_Defense
Retron	Retron_I_B	retron_I-B		Retron	Retron type I	TRUE		Population_level_protection	Verified_Defense
Retron	Retron_I_C	retron_I-C		Retron	Retron type I	TRUE		Population_level_protection	Verified_Defense
Retron	Retron_II	retron_II-A		Retron	Retron type II	TRUE		Population_level_protection	Verified_Defense
Retron	Retron_III	retron_III-A		Retron	Retron type III	TRUE		Population_level_protection	Verified_Defense
Retron	Retron_IV	retron_IV		Retron	Retron type IV	TRUE		Population_level_protection	Verified_Defense
Retron	Retron_IX	retron_IX		Retron	Retron type IX	TRUE		Population_level_protection	Verified_Defense
Retron	Retron_V	retron_V		Retron	Retron type V	TRUE		Population_level_protection	Verified_Defense
Retron	Retron_VI	retron_VI		Retron	Retron type VI	TRUE		Population_level_protection	Verified_Defense
Retron	Retron_VII_1	retron_VII-A1		Retron	Retron type VII	TRUE		Population_level_protection	Verified_Defense
Retron	Retron_VII_2	retron_VII-A2		Retron	Retron type VII	TRUE		Population_level_protection	Verified_Defense
Retron	Retron_VIII	retron_VIII		Retron	Retron type VIII	TRUE		Population_level_protection	Verified_Defense
Retron	Retron_X	retron_X		Retron	Retron type X	TRUE		Population_level_protection	Verified_Defense
Retron	Retron_XI	retron_XI		Retron	Retron type XI	TRUE		Population_level_protection	Verified_Defense
Retron	Retron_XII	retron_XII		Retron	Retron type XII	TRUE		Population_level_protection	Verified_Defense
Retron	Retron_XIII	retron_XIII		Retron	Retron type XIII	TRUE		Population_level_protection	Verified_Defense
RexAB	RexAB	RexAB		RexAB	RexAB	TRUE		Unknown	Verified_Defense
Gao_RL	Gao_RL	GAO_29		RL	RL	TRUE		Unknown	Verified_Defense
RloC	RloC			RloC	RloC	TRUE		Unknown	Verified_Defense
		RM_type_HNH		RM	HNH	TRUE		Unknown	Verified_Defense
RM	RM_Type_I	RM_type_I		RM	RM type I	TRUE		Degradation_of_foreign_nucleic_acids	Verified_Defense
RM	RM_Type_II	RM_type_II		RM	RM type II	TRUE		Degradation_of_foreign_nucleic_acids	Verified_Defense
RM	RM_Type_IIG	RM_type_IIG		RM	RM type II	TRUE		Degradation_of_foreign_nucleic_acids	Verified_Defense
RM	RM_Type_III	RM_type_III		RM	RM type III	TRUE		Degradation_of_foreign_nucleic_acids	Verified_Defense
RM	RM_Type_IV	RM_type_IV		RM	RM type IV	TRUE		Degradation_of_foreign_nucleic_acids	Verified_Defense
RnlAB	RnlAB			RnlAB	RnlAB	TRUE		Unknown	Verified_Defense
RosmerTA	RosmerTA	RosmerTA		RosmerTA	RosmerTA	TRUE		Unknown	Verified_Defense
SEFIR	SEFIR	SEFIR		SEFIR	SEFIR	TRUE		Population_level_protection	Verified_Defense
Septu	Septu			Septu	Septu	TRUE		Unknown	Verified_Defense
		septu_type_I		Septu	Septu	TRUE		Unknown	Verified_Defense
		septu_other		Septu	Septu other	FALSE		Unknown	Loose_Model_Candidate
Shango	Shango	Shango		Shango	Shango	TRUE		Unknown	Verified_Defense
Shedu	Shedu	shedu		Shedu	Shedu	TRUE		Unknown	Verified_Defense
ShosTA	ShosTA	ShosTA		ShosTA	ShosTA	TRUE		Unknown	Verified_Defense
FS_Sma	FS_Sma			Sma	Sma	TRUE		Unknown	Verified_Defense
SoFIC	SoFic	SoFic		SoFic	SoFic	TRUE		Unknown	Verified_Defense
SpbK	SpbK	spbK		SpbK	SpbK	TRUE		Unknown	Verified_Defense
Stk2	Stk2	Stk2		Stk2	Stk2	TRUE		Unknown	Verified_Defense
Gao_TerY	Gao_TerY	TerY-P		TerY-P	TerY-P	TRUE		Unknown	Verified_Defense
		TerY-P_other		TerY-P other	TerY-P other	FALSE		Unknown	Loose_Model_Candidate
Thoeris	Thoeris_I	thoeris_type_I		Thoeris	Thoeris type I	TRUE		Population_level_protection	Verified_Defense
Thoeris	Thoeris_II			Thoeris	Thoeris type II	TRUE		Population_level_protection	Verified_Defense
		thoeris_type_II		Thoeris	Thoeris + ThsC	TRUE		Population_level_protection	Verified_Defense
		thoeris_other		Thoeris other	Thoeris other	FALSE		Population_level_protection	Loose_Model_Candidate
Tiamat	Tiamat	Tiamat		Tiamat	Tiamat	TRUE		Unknown	Verified_Defense
		Tin		Tin	Tin	TRUE		Unknown	Verified_Defense
Rst_TIR-NLR	Rst_TIR-NLR	TIR-NLR		TIR-NLR	TIR-NLR	TRUE		Unknown	Verified_Defense
Gao_Tmn	Gao_Tmn	tmn		Tmn	Tmn	TRUE		Unknown	Verified_Defense
Gao_Upx	Gao_Upx	upx		Upx	Upx	TRUE		Unknown	Verified_Defense
Uzume	Uzume	Uzume		Uzume	Uzume	TRUE		Unknown	Verified_Defense
Viperin	Viperin	viperin_kinase_fusion		Viperin	Viperin-kinase	TRUE		Inhibition_of_DNA_and_RNA_synthesis	Verified_Defense
Viperin	Viperin	viperin_nerd		Viperin	Viperin-NERD	TRUE		Inhibition_of_DNA_and_RNA_synthesis	Verified_Defense
Viperin	Viperin	viperin_solo		Viperin	Viperin solo	TRUE		Inhibition_of_DNA_and_RNA_synthesis	Verified_Defense
Viperin	Viperin	viperin_toxin		Viperin	Viperin-Toxin	TRUE		Inhibition_of_DNA_and_RNA_synthesis	Verified_Defense
Viperin	Viperin	viperin_tpr		Viperin	Viperin-TPR	TRUE		Inhibition_of_DNA_and_RNA_synthesis	Verified_Defense
		viperin_other		Viperin	Viperin other	FALSE		Inhibition_of_DNA_and_RNA_synthesis	Loose_Model_Candidate
		VSPR		VSPR	VSPR	FALSE		Unknown	Loose_Model_Candidate
Wadjet	Wadjet_I	wadjet_type_I		Wadjet	Wadjet type I	TRUE		Degradation_of_foreign_nucleic_acids	Verified_Defense
Wadjet	Wadjet_II	wadjet_type_II		Wadjet	Wadjet type II	TRUE		Degradation_of_foreign_nucleic_acids	Verified_Defense
Wadjet	Wadjet_III	wadjet_type_III		Wadjet	Wadjet type III	TRUE		Degradation_of_foreign_nucleic_acids	Verified_Defense
Wadjet	Wadjet			Wadjet	Wadjet	TRUE		Degradation_of_foreign_nucleic_acids	Verified_Defense
		wadjet_other		Wadjet	Wadjet other	FALSE		Degradation_of_foreign_nucleic_acids	Loose_Model_Candidate
Zorya	Zorya_TypeI	zorya_type_I		Zorya	Zorya type I	TRUE		Unknown	Verified_Defense
Zorya	Zorya_TypeII	zorya_type_II		Zorya	Zorya type II	TRUE		Unknown	Verified_Defense
Zorya	Zorya_TypeIII	zorya_type_III		Zorya	Zorya type III	TRUE		Unknown	Verified_Defense
		zorya_other		Zorya	Zorya other	FALSE		Unknown	Loose_Model_Candidate
6A_MBL	6A_MBL			6A_MBL	6A_MBL	TRUE		Unknown	Verified_Defense
AbiAlpha	AbiAlpha			AbiAlpha	AbiAlpha	TRUE		Unknown	Verified_Defense
All_UG	UG17			All_UG	UG17	TRUE		Unknown	Verified_Defense
All_UG	UG29			All_UG	UG29	TRUE		Unknown	Verified_Defense
All_UG	UG14			All_UG	UG14	TRUE		Unknown	Verified_Defense
All_UG	UG38			All_UG	UG38	TRUE		Unknown	Verified_Defense
All_UG	UG5_small			All_UG	UG5_small	TRUE		Unknown	Verified_Defense
All_UG	UG39			All_UG	UG39	TRUE		Unknown	Verified_Defense
All_UG	UG19_large			All_UG	UG19_large	TRUE		Unknown	Verified_Defense
All_UG	UG9_large			All_UG	UG9_large	TRUE		Unknown	Verified_Defense
All_UG	UG3			All_UG	UG3	TRUE		Unknown	Verified_Defense
All_UG	UG1			All_UG	UG1	TRUE		Unknown	Verified_Defense
All_UG	UG4			All_UG	UG4	TRUE		Unknown	Verified_Defense
All_UG	UG9_small			All_UG	UG9_small	TRUE		Unknown	Verified_Defense
All_UG	UG7			All_UG	UG7	TRUE		Unknown	Verified_Defense
All_UG	UG19_small			All_UG	UG19_small	TRUE		Unknown	Verified_Defense
All_UG	UG6			All_UG	UG6	TRUE		Unknown	Verified_Defense
All_UG	UG8			All_UG	UG8	TRUE		Unknown	Verified_Defense
All_UG	UG37			All_UG	UG37	TRUE		Unknown	Verified_Defense
All_UG	UG23			All_UG	UG23	TRUE		Unknown	Verified_Defense
All_UG	UG13b			All_UG	UG13b	TRUE		Unknown	Verified_Defense
All_UG	UG10_small			All_UG	UG10_small	TRUE		Unknown	Verified_Defense
All_UG	UG22			All_UG	UG22	TRUE		Unknown	Verified_Defense
All_UG	UG36			All_UG	UG36	TRUE		Unknown	Verified_Defense
All_UG	UG20			All_UG	UG20	TRUE		Unknown	Verified_Defense
All_UG	UG34			All_UG	UG34	TRUE		Unknown	Verified_Defense
All_UG	UG13a			All_UG	UG13a	TRUE		Unknown	Verified_Defense
All_UG	UG35			All_UG	UG35	TRUE		Unknown	Verified_Defense
All_UG	UG21			All_UG	UG21	TRUE		Unknown	Verified_Defense
All_UG	UG25			All_UG	UG25	TRUE		Unknown	Verified_Defense
All_UG	UG31			All_UG	UG31	TRUE		Unknown	Verified_Defense
All_UG	UG30			All_UG	UG30	TRUE		Unknown	Verified_Defense
All_UG	UG24			All_UG	UG24	TRUE		Unknown	Verified_Defense
All_UG	UG18			All_UG	UG18	TRUE		Unknown	Verified_Defense
All_UG	UG32			All_UG	UG32	TRUE		Unknown	Verified_Defense
All_UG	UG26			All_UG	UG26	TRUE		Unknown	Verified_Defense
All_UG	UG27			All_UG	UG27	TRUE		Unknown	Verified_Defense
All_UG	UG33			All_UG	UG33	TRUE		Unknown	Verified_Defense
AspAB	AspAB			AspAB	AspAB	TRUE		Unknown	Verified_Defense
Belenos	Belenos			Belenos	Belenos	TRUE		Unknown	Verified_Defense
Belisama	Belisama			Belisama	Belisama	TRUE		Unknown	Verified_Defense
Brig1	Brig1			Brig1	Brig1	TRUE		Unknown	Verified_Defense
Brigantia	Brigantia			Brigantia	Brigantia	TRUE		Unknown	Verified_Defense
CARD_NLR	CARD_NLR_GasderMIN			CARD-NLR	CARD-NLR-GasderMIN	TRUE		Unknown	Verified_Defense
Ceres	Ceres			Ceres	Ceres	TRUE		Unknown	Verified_Defense
Cernunnos	Cernunnos			Cernunnos	Cernunnos	TRUE		Unknown	Verified_Defense
CoCoNut	Pseudo-CoCoNut			CoCoNut	Pseudo-CoCoNut	TRUE		Unknown	Verified_Defense
CoCoNut	CoCoNut_III-B			CoCoNut	CoCoNut III-B	TRUE		Unknown	Verified_Defense
CoCoNut	CoCoNut_III-C			CoCoNut	CoCoNut III-C	TRUE		Unknown	Verified_Defense
CoCoNut	CoCoNut_III-A			CoCoNut	CoCoNut III-A	TRUE		Unknown	Verified_Defense
CoCoNut	CoCoNut_I-B			CoCoNut	CoCoNut I-B	TRUE		Unknown	Verified_Defense
CoCoNut	CoCoNut_I-C			CoCoNut	CoCoNut I-C	TRUE		Unknown	Verified_Defense
CoCoNut	CoCoNut_I-A			CoCoNut	CoCoNut I-A	TRUE		Unknown	Verified_Defense
CoCoNut	CoCoNut_II			CoCoNut	CoCoNut II	TRUE		Unknown	Verified_Defense
Damona	Damona			Damona	Damona	TRUE		Unknown	Verified_Defense
Divona	Divona			Divona	Divona	TRUE		Unknown	Verified_Defense
DS-1	DS-1			DS-1	DS-1	TRUE		Unknown	Verified_Defense
DS-10	DS-10			DS-10	DS-10	TRUE		Unknown	Verified_Defense
DS-11	DS-11			DS-11	DS-11	TRUE		Unknown	Verified_Defense
DS-12B	DS-12B			DS-12B	DS-12B	TRUE		Unknown	Verified_Defense
DS-13	DS-13			DS-13	DS-13	TRUE		Unknown	Verified_Defense
DS-14	DS-14			DS-14	DS-14	TRUE		Unknown	Verified_Defense
DS-15	DS-15			DS-15	DS-15	TRUE		Unknown	Verified_Defense
DS-16	DS-16			DS-16	DS-16	TRUE		Unknown	Verified_Defense
DS-17	DS-17			DS-17	DS-17	TRUE		Unknown	Verified_Defense
DS-18	DS-18			DS-18	DS-18	TRUE		Unknown	Verified_Defense
DS-19	DS-19			DS-19	DS-19	TRUE		Unknown	Verified_Defense
DS-2	DS-2			DS-2	DS-2	TRUE		Unknown	Verified_Defense
DS-20	DS-20			DS-20	DS-20	TRUE		Unknown	Verified_Defense
DS-21	DS-21			DS-21	DS-21	TRUE		Unknown	Verified_Defense
DS-22	DS-22			DS-22	DS-22	TRUE		Unknown	Verified_Defense
DS-23	DS-23			DS-23	DS-23	TRUE		Unknown	Verified_Defense
DS-24	DS-24			DS-24	DS-24	TRUE		Unknown	Verified_Defense
DS-25	DS-25			DS-25	DS-25	TRUE		Unknown	Verified_Defense
DS-27	DS-27			DS-27	DS-27	TRUE		Unknown	Verified_Defense
DS-28	DS-28			DS-28	DS-28	TRUE		Unknown	Verified_Defense
DS-29	DS-29			DS-29	DS-29	TRUE		Unknown	Verified_Defense
DS-3	DS-3			DS-3	DS-3	TRUE		Unknown	Verified_Defense
DS-31	DS-31			DS-31	DS-31	TRUE		Unknown	Verified_Defense
DS-32	DS-32			DS-32	DS-32	TRUE		Unknown	Verified_Defense
DS-33	DS-33			DS-33	DS-33	TRUE		Unknown	Verified_Defense
DS-34	DS-34			DS-34	DS-34	TRUE		Unknown	Verified_Defense
DS-35	DS-35			DS-35	DS-35	TRUE		Unknown	Verified_Defense
DS-36	DS-36			DS-36	DS-36	TRUE		Unknown	Verified_Defense
DS-37	DS-37			DS-37	DS-37	TRUE		Unknown	Verified_Defense
DS-38	DS-38			DS-38	DS-38	TRUE		Unknown	Verified_Defense
DS-39	DS-39			DS-39	DS-39	TRUE		Unknown	Verified_Defense
DS-4	DS-4			DS-4	DS-4	TRUE		Unknown	Verified_Defense
DS-40	DS-40			DS-40	DS-40	TRUE		Unknown	Verified_Defense
DS-41	DS-41			DS-41	DS-41	TRUE		Unknown	Verified_Defense
DS-42	DS-42			DS-42	DS-42	TRUE		Unknown	Verified_Defense
DS-43	DS-43			DS-43	DS-43	TRUE		Unknown	Verified_Defense
DS-44	DS-44			DS-44	DS-44	TRUE		Unknown	Verified_Defense
DS-45	DS-45			DS-45	DS-45	TRUE		Unknown	Verified_Defense
DS-5	DS-5			DS-5	DS-5	TRUE		Unknown	Verified_Defense
DS-6	DS-6			DS-6	DS-6	TRUE		Unknown	Verified_Defense
DS-7	DS-7			DS-7	DS-7	TRUE		Unknown	Verified_Defense
DS-8	DS-8			DS-8	DS-8	TRUE		Unknown	Verified_Defense
DS-9	DS-9			DS-9	DS-9	TRUE		Unknown	Verified_Defense
Epona	Epona			Epona	Epona	TRUE		Unknown	Verified_Defense
Erebus	Erebus			Erebus	Erebus	TRUE		Unknown	Verified_Defense
Esos	Esos			Esos	Esos	TRUE		Unknown	Verified_Defense
FS_HEPN_TM	FS_HEPN_TM			HEPN-TM	HEPN-TM	TRUE		Unknown	Verified_Defense
gcu142	gcu142			gcu142	gcu142	TRUE		Unknown	Verified_Defense
gcu167	gcu167			gcu167	gcu167	TRUE		Unknown	Verified_Defense
gcu233	gcu233			gcu233	gcu233	TRUE		Unknown	Verified_Defense
gcu24	gcu24			gcu24	gcu24	TRUE		Unknown	Verified_Defense
gcu76	gcu76			gcu76	gcu76	TRUE		Unknown	Verified_Defense
gcuWGS21	gcuWGS21			gcuWGS21	gcuWGS21	TRUE		Unknown	Verified_Defense
Geb	Geb			Geb	Geb	TRUE		Unknown	Verified_Defense
Hypnos	Hypnos			Hypnos	Hypnos	TRUE		Unknown	Verified_Defense
Lamassu-Fam	Lamassu-DS-30			Lamassu	Lamassu DS-30	TRUE		Unknown	Verified_Defense
Lanthiphage	Lanthiphage			Lanthiphage	Lanthiphage	TRUE		Unknown	Verified_Defense
Lugos	Lugos			Lugos	Lugos	TRUE		Unknown	Verified_Defense
MADS3-4	MADS3-4			MADS3-4	MADS3-4	TRUE		Unknown	Verified_Defense
Nantosuelta	Nantosuelta			Nantosuelta	Nantosuelta	TRUE		Unknown	Verified_Defense
Nemetona	Nemetona			Nemetona	Nemetona	TRUE		Unknown	Verified_Defense
Ogmios	Ogmios			Ogmios	Ogmios	TRUE		Unknown	Verified_Defense
Oshun	Oshun			Oshun	Oshun	TRUE		Unknown	Verified_Defense
Prithvi	Prithvi			Prithvi	Prithvi	TRUE		Unknown	Verified_Defense
Prometheus	Prometheus			Prometheus	Prometheus	TRUE		Unknown	Verified_Defense
RM	RM_Type_IV_1			RM	RM type IV-1	TRUE		Unknown	Verified_Defense
RM	RM_Type_IIG_2			RM	RM type II-2	TRUE		Unknown	Verified_Defense
SDIC1	SDIC1			SDIC1	SDIC1	TRUE		Unknown	Verified_Defense
SDIC3	SDIC3			SDIC3	SDIC3	TRUE		Unknown	Verified_Defense
SDIC4	SDIC4			SDIC4	SDIC4	TRUE		Unknown	Verified_Defense
Sirona	Sirona			Sirona	Sirona	TRUE		Unknown	Verified_Defense
Sucellos	Sucellos			Sucellos	Sucellos	TRUE		Unknown	Verified_Defense
Taranis	Taranis			Taranis	Taranis	TRUE		Unknown	Verified_Defense
TgvAB	TgvAB			TgvAB	TgvAB	TRUE		Unknown	Verified_Defense
Tha	Tha			Tha	Tha	TRUE		Unknown	Verified_Defense
Thoeris	Thoeris_III			Thoeris	Thoeris type III	TRUE		Unknown	Verified_Defense
Thoeris	Thoeris_IV			Thoeris	Thoeris type IV	TRUE		Unknown	Verified_Defense
TIR-I	TIR-I			TIR-I	TIR-I	TRUE		Unknown	Verified_Defense
TIR-III	TIR-III			TIR-III	TIR-III	TRUE		Unknown	Verified_Defense
TIR-IV	TIR-IV			TIR-IV	TIR-IV	TRUE		Unknown	Verified_Defense
TIR-VII	TIR-VII			TIR-VII	TIR-VII	TRUE		Unknown	Verified_Defense
TIR-VIII	TIR-VIII			TIR-VIII	TIR-VIII	TRUE		Unknown	Verified_Defense
Toutatis	Toutatis			Toutatis	Toutatis	TRUE		Unknown	Verified_Defense
Ukko	Ukko			Ukko	Ukko	TRUE		Unknown	Verified_Defense
Veles	Veles			Veles	Veles	TRUE		Unknown	Verified_Defense
VP1796	VP1796			VP1796	VP1796	TRUE		Unknown	Verified_Defense
VP1817	VP1817			VP1817	VP1817	TRUE		Unknown	Verified_Defense
VP1823	VP1823			VP1823	VP1823	TRUE		Unknown	Verified_Defense
VP1826	VP1826			VP1826	VP1826	TRUE		Unknown	Verified_Defense
VP1839	VP1839			VP1839	VP1839	TRUE		Unknown	Verified_Defense
VP1840	VP1840			VP1840	VP1840	TRUE		Unknown	Verified_Defense
VP1848	VP1848			VP1848	VP1848	TRUE		Unknown	Verified_Defense
VP1851	VP1851			VP1851	VP1851	TRUE		Unknown	Verified_Defense
VP1853	VP1853			VP1853	VP1853	TRUE		Unknown	Verified_Defense

## Sheet: Sheet5
Chromosome
Defense_Subtype	Sample_01	Sample_02	Sample_06	Sample_07	Sample_11	Sample_12	Sample_40	Sample_41	Sample_45	Sample_46	Sample_50	Sample_51	Sample_28	Sample_32	Sample_36	Sample_67	Sample_71	Sample_75	Sample_16	Sample_20	Sample_24	Sample_55	Sample_59	Sample_63	Sample_03	Sample_08	Sample_13	Sample_42	Sample_47	Sample_52	Sample_29	Sample_33	Sample_37	Sample_68	Sample_72	Sample_76	Sample_17	Sample_21	Sample_25	Sample_56	Sample_60	Sample_64	Sample_04	Sample_09	Sample_14	Sample_43	Sample_48	Sample_53	Sample_30
3HP	0	0	0	3.12967	0	0	0	0	0.690384	0	0	0	0.554954	1.68308	0.463456	1.24195	0.671022	0.866373	42.4783	0.857355	0.634202	1.54764	0	0	4.3779578599999995	4.0665222199999995	3.01521	1.36912	1.23821	1.64404	0	0	0	0	0	0	0	0.750494	0	0	0	0	5.2275	5.08439	5.39275	2.52781	3.54514	2.29054	0
6A_MBL	6.69251	10.947745959999999	5.56952	5.48856	5.12295	7.217291400000001	7.85031	6.75516	4.7617394399999995	7.57165	7.7413817300000005	7.04774	6.137116359999999	9.48013	9.16545	12.0418	8.89503	6.84126	3.3264	7.257003549999999	9.88638	37.0024	11.5271	19.781975539999998	5.09995	5.0954	2.61697	5.67837	5.23244	4.29981	2.58665	7.36716	6.72024	5.5322995299999995	2.92332	1.05179	2.85368	3.33821	5.36066	6.856728260000001	5.76492	7.46771	7.9619240300000005	5.02014	6.443811029999999	4.71511	9.37612	6.2651870899999995	5.41446
AVAST type I	0	0	0	0	0	0	0.352342	0	0	0	0.641407	0	0.579479	2.44176	1.15803	2.42763	3.76279	2.26802	7.96335	4.53996	0.722274	2.91491	8.91337	2.0107	0	0	0	0	0.378303	0	3.07191	1.16781	0.9039090000000001	1.73029	2.19176	1.47923	0	0	0	1.00329	0	1.13349	0	0	0	0	0.494562	0	0.7086641300000001
AVAST type II	1.72952	6.0828448999999996	0	26.799787100000003	0	15.1725	3.08355	3.88067	4.23243	8.17355	0	8.63422	8.27688	9.22479	19.0426	4.43019	4.5293	7.4473	12.1028	10.0283	11.6247	25.3702	11.0541	23.1183	28.9482	29.5394	23.0283	8.39336	7.86596	4.09397	14.2135	8.96829	18.8333	5.96336	5.39947	6.19252	13.0262	16.8063	16.2742	12.146	10.9584	16.1221	33.4519	35.5155	36.450000440000004	8.146366239999999	15.4362	7.24212	8.264977720000001
AVAST type IV	4.67171	3.39105	3.40704	3.64968	4.01055	4.27989	5.10041	4.50967	6.87835	2.8651040400000003	5.77421	1.52831	0	0.462064	0	0.882696	1.83378	0	0.999321	1.63792	0	0.64276	0.551276	0	10.131	7.82776	5.09854	9.031925730000001	9.63076	7.92009	0	0.802502	0	1.17724	0.467683	0	0	3.18924	6.02986	3.1306	3.62124	4.59219	6.8410528500000005	6.42891	7.7625	7.67465	10.742050970000001	9.03065	0.227781
AVAST type V	0.246535	2.47221	0.502083	0.868067	2.75367	2.14039	1.99855	2.5562553699999997	2.12854	2.09387	0	1.42074	1.7151839999999998	2.77987	2.95071	3.41548	3.80581	2.2810479299999997	0.993742	1.20459	1.4929142199999998	2.20496	6.66188	1.06015	3.43092	3.9071064399999997	2.88353	1.73641	2.17578	2.46094	2.64296	4.06807	6.28036	2.37017	4.43458	0.569284	0.924643	3.20482	4.65151	4.61722	4.3231	5.39605	5.064	5.5573	5.22089	2.4712756999999996	5.10906	2.2028993999999997	0.7201510900000001
Abi2	27.5327	29.749	18.5334	28.9955	28.8761	39.422	38.5951	38.6065	49.240704029999996	42.1378	12.473	22.3739	32.0235	30.0508	13.5306	43.7457	32.1089	35.807	4.43584	25.7589	10.8964	13.1716	48.7904	28.687462879999998	42.0699	54.5908	45.6757	58.781	58.7553	66.3038	47.8161	26.0144	20.8503	50.4451	72.9529	40.028	30.0881	24.8967	38.636872860000004	47.3449	41.2645	46.41	32.9057	63.478	58.07	61.965	96.7604	76.61340225000001	32.1355
AbiA	0	0	0	0	0	0	0	0	0	0	0	0	0	0	0	0	0	0	0	0	1.24564	0	0	0	0	0	0	0	0	0	0	0	0	0	0	0	0	0	0	0	0	0	0	0	0	0	0	0	0
AbiAlpha	0.348195	19.6574	2.1635445300000002	10.8677	4.40352	19.9099	5.99879	14.0208	11.2506	15.302182140000001	0	12.2432	4.64696	17.0505	10.6855	12.640328349999999	8.73809	9.5955	1.82926	2.21125	5.49923	41.9603	7.50478	8.80498	14.2199	11.685	8.6715	16.5968	21.2824	30.5352	8.627407259999998	33.1032	14.9363	36.3448	25.566	28.596	8.18176	9.30395	11.6984	15.2112	14.5076	18.750993870000002	5.94272	8.790278409999999	12.4072	15.739950499999999	31.3146	23.8353	7.15847
AbiC	3.56667	2.39687	3.41371	0.931607	5.44232	2.4364	4.26725	2.7379	2.47105	1.57519	5.82223	3.07504	4.93248	3.93419	2.02382	2.94121	1.5317913600000002	0.697126	0.539331	0.359108	0.738256	0	0.387366	1.14448	4.94718	4.93783	2.21025	2.7698370900000002	1.72698	0.826052	1.71916	0.75967	0.58103	2.39147	2.29752	2.35338	1.01165	1.3310655599999999	2.39842	2.8212789099999998	1.06565	2.23687	5.66206	3.95195	6.16704	1.82319	4.28818	2.34891	3.4462593200000002
AbiD	232.635	178.819	165.922	159.973	190.21468093000001	180.177	281.098	212.70493045999999	214.812	238.164	192.02	203.522	258.586	224.896	174.65	264.46	235.316	216.257	97.0364	134.884	124.623	80.9178	292.259	231.881	240.041	276.175	218.042	202.247	215.828	195.23	272.572	163.66589138999998	209.427	245.028	360.638	263.286	173.821	170.318	200.869	253.22	209.514	216.826	175.027	194.247	226.889	177.622	275.086	182.54	298.778
AbiE	391.485	424.382	356.437	436.51380240000003	410.204	590.133	503.344	468.9	365.517	408.748	441.708	476.828	302.58	318.303	189.57	320.046	261.416	259.465	74.0729	195.962	196.636	74.966	368.98	256.64	419.66	442.414	394.871	390.739	396.987	501.817	314.755	301.048	184.886	443.209	472.688	394.952	271.555	297.934	394.49322884000003	389.565	320.798	385.487	362.981	389.774	411.469	319.99	499.582	478.551	267.166
AbiG	0	0	0	0	0	0	0	0	0	0	0	0	0.82824	0	0	0	0	0	0	0	0	0	0.503763	0	0	0	0	0	0	0	0	0	0	0.493105	0.29669	0	0	0	0	0.342307	0	0	0	0	0	0	0	0	0.43049
AbiH	37.2452	28.0284	35.3539	38.158	41.491	58.608151809999995	68.6411	48.0876	55.1255	55.5013	46.4107	55.3714	98.8374	87.3734	104.347	103.22	83.3949	97.7356	30.0784	57.4122	58.996	189.63	106.931	124.6	89.335	124.077	80.7901	67.8413	64.6647	53.4865	96.9072	71.1405	135.975	54.8818	87.0348	45.8382	45.1112	59.4486	65.9598	100.188	78.6955	82.188	74.7611	116.894	120.367	70.2962	83.2888	73.336	125.426
AbiI	0	0	0	0	0	0	0	0	0	0	0	0	0	0	0	0	0	0	0	0	0	0	0	0	0	1.69379	0.572795	0.25531	0.403209	0	0	0	0	0	0	0	0	0	0	0	0	0	1.9735824599999998	3.8862569000000002	1.6921325600000001	2.47035	7.185791999999999	5.82839	0
AbiJ	17.043	7.33442	11.2529	8.82333	14.6597	13.0048	10.8464	20.8719	24.315382200000002	27.0481	11.6258	13.968	24.5324	23.1705	25.812079490000002	22.8887	19.4815	18.1157	53.103546869999995	7.72896	16.46	80.1983	26.0877	40.8978	18.5427	36.8557	16.4975	27.8589	24.8402	12.6546	19.3957	13.6772	18.4809	17.009000800000003	15.828563149999999	37.067855200000004	14.1284	22.3793	22.3068	42.0542	45.962931160000004	32.2344	11.2162	16.3542	20.7086	16.6454	28.396	14.4798	29.8422
AbiL	87.5108	74.6541	53.0339	91.2778	70.3234	138.687	122.976	113.281	91.9362	116.248	90.2248	122.299	83.8218	95.3793	54.5739	98.3669	78.79	74.1634	55.2465	60.1447	70.6917	51.7325	124.555	84.3587	188.383	181.589	172.495	102.172	105.586	127.069	86.6674	78.551	68.0867	120.079	125.003	102.545	109.183	154.932	165.413	133.701	103.914	117.803	206.238	184.399	222.301	93.7974	138.078	127.468	186.631
AbiN	1.36427	0.881232	0.874498	0	3.5226214999999996	0.569144	1.26134	1.14661	0	0.899755	1.8449	0.470055	0	0	0	0	0	0	0	0	0	0	0	0	2.14544	1.87977	0.991778	1.61121	0	0	0	0	0	0	0	0	0	0	0	0	0.924517	0.475611	0.571856	0	1.99729	0.792588	2.06117	1.79755	0
AbiO/Nhi	5.59806	6.30579	3.5476257899999997	6.63301	6.02949	8.62136	10.059104080000001	3.8951058100000004	6.62225	7.41348	1.78661	8.19155	11.393352870000001	11.4556	6.52881	13.8417	9.355889040000001	13.8009	4.47685	6.8473004600000005	9.58711	3.91581	19.1105	4.90729	16.040275049999998	16.102	21.9795	9.3178	7.471104599999999	5.17769	16.5532	8.145983489999999	7.57931	13.654251389999999	22.1121	15.2489	13.849	11.8876	14.7156	12.8874	8.44818	10.0402	10.7982	8.9922	12.3853	2.97758	6.90664	6.45564	7.93547
AbiP2	7.775610309999999	5.04958	3.99376	7.1801476399999995	3.82437	10.9575	10.7378	13.9091	7.74631	8.79126	8.129378749999999	12.2302	16.8165	13.9699	30.398282350000002	10.150314100000001	5.06434	11.865	1.75512	3.0584153499999998	1.74648	4.8451	4.33571	8.49063	2.25577	4.3986	1.1467	11.4043	11.7973	15.856282290000001	12.2215	8.81113	26.4509	7.897077039999999	4.33872	4.75472	4.28325	7.44161	6.11298	19.3992	16.8315	20.7669	3.58046	4.81695	5.67513	8.63999	12.115295399999999	14.4048	6.48336
AbiQ	21.0859	21.6021	19.0876	26.9538	21.6428	26.7007	28.1862	23.3927	23.5226	24.974391269999998	18.3913	26.6692	19.401	24.5282	10.1129	27.527	16.6833	20.498	14.703345989999999	18.0391	14.9842	2.15202	38.1324	15.9715	23.437	35.1214	40.6142	20.667516720000002	18.939	22.4071	17.1771	18.7437	11.566	16.4982	44.7459	25.6782	33.4282	27.6415	44.9541	46.925626199999996	40.6677	61.207	6.27346	20.8349	23.5157	13.4272	37.2278	22.8638	19.2409
AbiT	0	0	0	0	0	0	0.298423	0	0	0	0	1.20582	0	0	0	0	0	0	0	0	0	0	1.24684	0	0	0	0	0	0	0	0	0	0	0	0	0	0	0	0	0.24852	0	0	0	0	0	0	0	0	0
AbiU	22.3971	23.3514	18.9613	10.8383	21.6342	12.944210550000001	30.4775	13.1797	18.6081	16.3278	25.2566	10.4845	19.7402	33.6736	22.5229	21.6158	14.735226260000001	21.713	8.820288510000001	8.23387	12.621460319999999	23.2568	18.3425	16.8627	15.9184	17.9397	13.4521	19.1702	17.6246	14.1719	45.0397	41.734	25.6719	26.6774	29.7931	16.5322	10.3505	13.750790330000001	23.5685	20.6647	16.109	22.2286	25.2512	28.014882659999998	28.418720829999998	18.636	32.9153	15.908370380000001	27.8494
AbiV	1.29314	1.41616	1.08793	0.564289	1.17633	0.718635	0.954764	0	1.08309	1.06034	2.60444	2.26003	0	0	0	0	0	0	0.679931	0.713043	0.849783	0	0	0	6.11092	5.48849	5.27408	4.13634	1.2286	0	2.08153	1.98929	1.20212	0	0	0	0.950301	1.6878995099999998	3.4101850000000002	0.832615	0	0	10.514734189999999	11.2118	10.5738	7.9536767799999994	8.36549	2.28522	1.4980349899999998
AbiZ	3.85391	5.3693	3.1143	16.2102	3.27827	5.01608	4.36772	7.03685	6.964050739999999	0	1.20471	1.82861	2.21376	4.99763	5.39623	6.13236	4.9224	5.02361	5.08879	1.41539	16.2443	3.67764	0.6779759000000001	0	16.3314	13.21	12.2927	13.914798359999999	10.1757	8.86086	4.92379	5.31416	10.0177	13.974381710000001	8.08743	17.5599	9.35764	7.92474	12.4192	10.087	7.03671	9.55508	11.0776	13.896	15.4279	11.1249	17.3603	10.9708	3.33595
ApeA	0.62681	0	0.567908	1.16476	0.63897	1.39412	1.61569	1.74135	0	0.411405	0.719331	0.75225	0	0	0	0	0	0	0	0	0	0	0	0	0	0	0	0.416688	0	0	0	0	0	0	0	0	0	0	0	0	0	0	0	0	0	0	0	0	4.25004
Azaca	0	0	0	0	0	0	0	0	0	0	0	0	0	0.510625	0	0	0	0	0	0	0	0	0	0	1.06141	2.23015	1.87151	0	0	0	0.828384	1.54758	0.600408	0	0	0	0	0	0	0	0	0	0.982518	1.91247	2.57756	0.752972	0.512692	0	2.29524
BREX type I	47.0591	81.7786	55.0518	61.1306	58.1072	93.6214	55.0258	78.8119	71.2486	55.7008	54.4326	51.7806	34.6275	55.649	39.2276	36.7866	30.5932	33.869401599999996	89.3015	18.1925	77.01575964999999	30.4238	15.1552	13.2935	36.931326209999995	44.9732	25.8029	73.6899	88.9414	106.13427028000001	38.2098	60.6189	49.39	73.3214	61.3252	54.0454	39.3856	38.7997	58.0413	56.0167	68.8601	69.4428	25.5106	36.1112	46.5809	80.9452	117.85767062000001	108.056	33.4586
BREX type II	0	0	0	0	0	0	0.363391	0	0	0	0	0	0	0.829791	0	0	0	0	0	0	0	0	0	0	1.97702	3.36346	3.9060922000000002	0	0	0	2.00771	2.83905	1.0687647500000002	0	0	0	0	0	0	0.250315	0	0	1.60498	2.80739	3.99399	0.804432	0.82263	0	4.10811
BREX type III	2.64704	4.66561	2.7214	1.61312	2.65402	5.25482	2.77779	2.86526	0.768817	2.61284	2.59699	1.95677	0	2.1741	0	1.4757636299999999	0.837792	0	0	0	0.460756	0	0.824884	0	2.68722	2.247	1.39667	3.26534	1.92975	0.9373	0	0.768064	0.529746	9.87061	4.90728	20.5248	1.4369	1.4265	1.43369	5.65113	8.43265	8.95054	1.73219	2.18251	2.48461	2.12392	3.81149	2.43441	1.29793
Belenos	0	0	0	0	0	0	0.277522	0	1.02397	0	0	0	2.17467	2.31414	8.51786	4.23689	3.45591	6.54227	0	0	0	0	0.661352	0	0	0	0	3.96215	1.8517	1.95819	2.72008	5.12769	16.8716	9.127955199999999	15.4516	57.7437	0	0	0	1.2496782499999999	1.4875	1.1941466200000002	0	0	0.469853	1.47885	1.43254	1.67404	0.730357
Belisama	7.22444	20.1359	12.1025	15.3024	6.89278	16.9438	31.6407	12.2703	58.971327009999996	10.9727	15.4467	6.80638	98.04922368999999	87.0145	286.111	104.28	76.9733	130.578	18.0066	26.948	15.5128	36.4714	33.8931	34.272	17.2275	66.5895	21.5376	115.95888099999999	86.0963	56.7868	70.4496	94.3339	299.585	52.7896	59.906	101.237	41.1849	65.1942	56.8739	59.2288	66.7127	79.5361	39.2111	66.6298	44.163	131.372	103.39	88.60951865999999	38.968
Borvo	2.63558	5.43025	1.28512	4.93958	1.5329926600000001	3.28066	3.76378	3.51667	5.38094	2.45328	4.6524	0	3.80439	5.0088	3.92407	3.75434	3.69408	3.41454	4.27373	2.96131	3.91383	23.929	6.995751439999999	6.1198399000000006	9.276075669999999	10.4451	4.22573	10.1441	8.66425	8.27369	4.71045	5.32389	5.4768229999999996	4.52716	1.46567	2.91313	4.91632	6.19274	11.1259	11.833745239999999	11.6484	14.4861	10.5928	8.18056	11.7091	6.49225	12.1166	8.65705	4.47911
BstA	1.51345	0	0.938211	0	0.362301	0.885336	0.409144	0	1.15507	0	0	0	3.1621538399999998	3.22238	11.1695	6.160133419999999	5.77403	8.85254	0	0.546713	0	0.802048	1.30624	0	0	0.805005	0	8.72314	1.99178	2.99072	4.41526	6.20318	27.7925	4.19645	13.8403	60.745754000000005	0	0	0	1.6552177700000001	1.91167	1.16332	0	1.23326	0.729801	1.71365	2.27979	2.4714911600000002	0.782838
Bunzi	0.831926	3.31036	1.10236	7.95991	1.4032	4.128603259999999	1.0091	1.84619	2.24875	1.35214	0.977398	1.11368	0.567266	2.9005	0.924331	2.11035	1.9396769600000001	1.70156	0	0	0	0	0	0	6.93115	7.27225	6.60843	5.44223	5.05946	6.35802	1.98059	9.73393	1.88075	6.8297018000000005	5.21027	2.66366	1.25722	3.18994	5.76524	2.77076	3.12381	2.70364	10.910475380000001	11.9409	11.664	6.606815409999999	10.6425	8.58343	8.655880380000001
Butters gp57r	1.52116	1.37779	1.29324	0.64283	1.26237	0	2.31812	0	1.30846	0	3.0018165999999997	0	0	0	0	0	0	0	0	0	0	0	0	0	0	0	0	0	0	0	0	0	0	0	0	0	0	0	0	0	0	0	0	0	0	0	0	0	0
CAS_Class1-Type-IV	0	0	0	0.936134	0	1.14633	0	0	0	0	0	0	0	1.1583	0.468854	0.749839	0.703081	0.792644	0	0	0	0	0	0	2.99839	2.65433	2.3638	0.511077	0	0.68644	0	1.26684	0	0	0.789977	0	1.06354	0	0.668783	0	0	0.305955	3.1263	2.86971	3.58531	0	1.41351	1.72815	0
CBASS type I	20.8188	25.682	20.5775	18.028	21.2514	31.8347	32.8601	21.6967	17.8819	24.447378490000002	29.2755	16.2325	20.4822	37.0964	34.96	28.7368	18.182	15.5265	71.7553	25.995649219999997	39.704	20.8384	21.1259	107.21221385999999	53.9921	57.3821	34.6247	29.944	29.640519140000002	28.0227	21.5914	34.677	50.7606	25.8258	17.4228	14.4974	43.9448	41.6903	37.1108	31.4595	24.578	37.9897	54.9611	62.277	67.0806	32.6182	45.3888	33.6674	33.3791
CBASS type II	14.1815	14.0279	11.5319	9.67613	17.5919	18.040245249999998	14.817963989999999	13.6232	12.5064	18.1061	12.6753	9.97044	14.509	21.3852	32.2601	15.1732	11.3079	13.709663540000001	37.1735	11.1336	17.339978459999998	42.2128	23.6417	37.8355	19.1991	22.0992	12.5034	19.6784	16.3928	9.60924	13.5523	12.5338	22.3763	15.1393	7.624733819999999	14.618	12.3844	15.928811080000001	16.506	18.7456	12.286	18.191	14.6272	29.2659	23.8202	15.3088	29.2315	19.7009	15.178308320000001
CBASS type III	0	0	0	0	0	0	0	0	0	0	0	0	0	0	0	0	0	0	3.78592	2.60174	0	0	0	0	0	0	0	0	0	0	0	0	0	0	0	0	0	0	0	0	0	0	0	0	0	0	0	0	0
CRISPR-Cas adaptation	220.035	204.756	204.249	169.429	223.106	294.643	311.754	232.789	188.272	264.224	285.599	224.405	118.016	190.642	105.851	164.992	122.54	134.388	59.517513969999996	91.6198	102.511	173.072	187.151	136.813	217.542	218.649	184.006	186.849	178.196	186.087	145.518	143.261	100.192	223.054	203.671	129.158	143.18	159.891	178.295	208.773	167.635	227.354	149.205	182.687	198.212	150.519	253.635	217.355	206.991
CRISPR-Cas type I	454.01	300.971	318.201	272.073	386.415	275.701	471.449	328.792	328.669	415.982	435.515	298.819	290.534	461.484	268.382	421.182	371.031	307.273	81.9127	172.485	235.182	113.906	315.013	263.686	237.208	269.265	216.661	309.102	269.236	225.209	351.483	275.81	207.41437163999998	396.92	345.289	406.094	225.433	280.057	301.338	374.58791309000003	266.152	419.319	172.222	136.839	221.256	232.624	320.51	217.66112341000002	481.065
CRISPR-Cas type II	54.3451	64.5823	48.8428	45.5293	58.8446	59.5723	74.7762	63.9652	63.5823	67.68490996999999	62.2202	61.1638	31.9904	53.1594	31.0646	53.0186	41.983	42.124744570000004	11.7423	24.8269	33.1737	31.2852	68.6223	46.3041	48.3107	49.7053	46.382197590000004	51.7013	54.6371	56.2907	35.667	38.8826	20.4184	81.4934	66.7483	57.7608	27.664383700000002	37.5954	51.457858449999996	62.7405	60.3149	75.1307	40.5335	28.6747	45.8201	46.4982	75.143	63.523560929999995	44.6499
CRISPR-Cas type III	135.755	122.006	119.801	90.9251	129.261	115.719	154.659	143.927	125.422	139.85954802999998	151.187	94.9668	61.1076	97.1928	50.6065	73.2224	55.1418	53.2558	20.5946	37.8931	44.8323	204.65	95.4905	61.974481159999996	71.6321	99.7375	64.1811	113.949	127.838	99.9031	70.0519	84.6568	45.987	122.308	99.1146	65.6749	58.979874530000004	50.6405	84.7294	123.668	98.5547	138.574	41.846	49.385479260000004	71.0627	91.2663	159.891	127.684	73.3711
CRISPR-Cas type IV	0.62644	3.2183851199999998	0.462753	8.27541	0.680184	9.05874	2.22978	4.22462	7.177	3.63179	1.29403	2.27345	0	7.431381640000001	2.34799	4.2541	1.27806	1.5117	2.4312503100000002	1.38463	0.579367	7.2228859000000005	4.19219	4.40215	7.48318	9.26196	5.97342	8.25624	9.792782429999999	10.7425	3.45758	8.40636	7.717818869999999	3.3105404500000004	2.91724	1.08238	1.19481	4.2848	3.27221	4.19817	5.60352	6.71588	6.8387927699999995	9.46683	9.117617189999999	8.41224	9.812666700000001	8.7352	4.0414
CRISPR-Cas type V	0.789235	2.14885	1.325	4.87705	1.89497	7.17507	7.02449	8.919653010000001	2.5978499399999997	8.28859	0.613256	6.44847	8.02813	5.46852	2.68798	9.051546850000001	8.2117	8.7553	0	4.19959	2.07791	0.558092	11.144	4.35391	1.4509543200000001	3.63879	2.06657	5.96687	8.34576	7.3859243999999995	7.3575466800000004	2.71161	4.01809	10.2477	16.6563	8.89941	4.48708	4.54893	3.9455	4.30039	2.13509	2.91783	0.384611	1.2456	0.423019	2.55599	8.661961660000001	3.76461	3.59443
CRISPR-Cas type VI	3.2991765699999998	1.01112	2.24426	8.1703	0.514137	6.19909	7.78137	7.205630510000001	1.6933190200000001	7.55658	6.39968	7.1029284299999995	0.530677	1.69877	0	2.67242	0.602381	0.864417	0	0.290937	0.393895	0	1.93961	0	1.1848895499999998	2.94223	5.5435	2.4260632600000003	3.75221	5.59842	0.937125	0	0	1.9329322800000002	0	2.03542	3.61996	2.31203	5.57962	6.175552590000001	5.6163416999999995	9.36466	0.50307	1.53594	1.3919	1.29264	5.71784	6.00381	3.60787
CapRel	24.4029	35.5711	33.0063	32.0692	35.9867	37.2487	32.5661	46.6609	49.4726	33.4541	25.3437	21.7169	17.0433	26.3497	29.628	22.906612889999998	24.549	25.264	0.768768	2.42431	1.14101	1.82719	4.061	1.91015	45.1147	43.1685	29.6926	54.4856	59.5425	62.9905	19.4674	36.4876	38.5206	53.032359729999996	37.2931	24.2914	18.2169	25.5921	49.5318	55.2535	65.4948	80.234	37.8077	42.8687	50.6522	48.3634	86.47676974000001	65.8258	47.9023
Ceres	19.9978	19.4486	23.0012	70.7809	22.7097	39.4941	19.7441	16.4653	17.5034	7.91948	19.4013	18.5692	5.23331	9.14596	11.2704	5.69251	5.41808	10.235025539999999	2.6589936300000003	2.69602	4.86075	1.2904975300000001	1.80379	1.60464	135.617	125.674	115.792	47.6655	27.4123	39.8978	23.5528	24.0983	22.0749	4.06849	2.7902658700000003	0.850667	24.8866	35.5194	39.5862	4.23572	2.69631	2.76724	197.835	192.454	192.551	72.1919	63.6075	53.0001	10.8045
Cernunnos	0.418573	1.59432	0.6284	2.53242	0	1.72024	0.954957	0.693901	0.53681	2.016	1.57864	1.23797	0.780897	2.89477	2.83643	1.71084	0.939968	2.52563	4.78202	1.3245461399999998	2.06271	0	2.89691	2.7736305999999997	1.73549	1.48885	0	0.39595	0	0	0.981904	2.05693	2.71921	0.736465	3.7175	5.16721	1.65891	0	0	2.6446986299999997	0.810858	0.964771	0	5.01596	0	0	2.12154	0	0.689623
CoCoNut I-A	0	0	0	0	0	0	0	0	0	0	0	0	0	0	0	0	0	0	0	0	0	0	0	0	1.76794	0.879787	0	0	0	0	0	0	0	0	0	0	0	0	0.588043	0	0	0	0.694451	0.660854	1.46827	0	0	0	0
CoCoNut I-C	1.6236	1.37445	3.22425	0	4.05499	0.690392	4.07872	4.4371	4.67249	4.49843	1.94795	1.80297	3.3745407800000002	5.23649	10.7423	8.8507	5.66027	2.86909	3.81023	3.82456	21.6043	23.385317639999997	7.38492	8.74205	8.16221	15.0224	6.75285	5.69153	4.932911900000001	1.54001	1.74291	0.601739	5.83641	0.483149	1.51542	1.21671	7.3723323999999995	9.1054	8.897949500000001	11.4872	12.845017630000001	7.82936	3.82418	13.7281	15.351	5.33284	5.8582088599999995	3.67035	16.7653
CoCoNut II	0	0	0	0	0	0	0	0	0	0	0	0	0	0	0	0	0	0	0	5.27588	0	0	0	0	0	0	0	0.665776	0	0.883181	0	0	1.02282	0	0	1.27493	0	0	0	0.64471	0	0	0	0	0	0.762158	0	0	0
CoCoNut III-A	0	0.639441	0	1.23704	0	1.06575	0	0	0	0	0	0	0	0	0	0	0	0	2.80851	0.335327	0	0	0	0	4.07413	3.8243691999999996	3.42143	1.2520932999999999	0.75914	0.939491	2.71089	1.59474	2.97321	0	0	0	0	0	0	0	0	0	6.35186	6.887972700000001	6.96322	1.9092	1.8414422899999998	1.80807	0
DISARM type I	1.28008	2.02589	0.879551	1.18717	0.995146	1.41003	1.33034	4.31326	1.06289	4.1088	1.38689	2.89901	0	0.62851	0	0.718891	0.921615	0.714667	0	0	0	0	0	0	0.7517	0.530251	0	1.03544	0.948911	0.915104	0	0.747633	0.487109	2.79727	1.21876	1.94648	0	0	0	2.14271	1.62817	2.73492	0.777078	0	0.583406	1.09393	1.08805	1.01041	0.959277
DRT class I	5.66917	5.17294	5.81152	10.682103569999999	8.71502	10.3075	8.28807	3.57867	3.6457262999999998	6.7672374600000005	11.9206	7.64926	5.320109629999999	4.07001	3.41296	3.92687	4.20359	1.5886310300000002	2.85947	2.82515	4.078740850000001	6.41715	5.01208	112.372	3.85328	2.8976144600000002	1.4346284900000001	3.06901	3.15685	1.56115	4.274616399999999	3.0218390399999997	1.81968	1.2510623399999998	1.66498	0.719406	1.79281	3.27651	3.01167	5.73238	5.69218	6.89391	1.59004	2.22315	2.25391	5.64712	4.76521	3.18694	4.91483
DRT class II	4.74337	4.64772	2.35413	3.88164	4.61017	3.8894133500000003	6.7714981100000005	5.15992	5.96793	13.8203	2.53235	6.20153	5.91818	4.98494	2.46707	7.580134150000001	5.7609	4.85886	2.0772	4.10091	4.10265	1.32017	4.43097	2.83551	28.2182	22.4062	12.0256	4.2242	4.51698	4.6316934100000005	4.66361	3.61225	2.67954	5.63052	7.35059	4.03382	4.88475	8.05482	8.75587	4.72661	3.62353	3.25653	6.66862	3.48492	7.75975	3.45751	7.87505	3.5564996000000004	7.13791
DRT class III	8.40817	25.534081710000002	4.60487	12.205308200000001	7.61049	11.0656	6.17841	7.96144	12.787	5.4098589399999994	8.84607	4.12165	13.3074	18.4638	20.1986	9.85102	11.9358	10.1801	8.413494140000001	3.77781	3.78953	3.49865	8.66655	3.30416	10.7951	13.1265	10.944058100000001	16.7527	20.3427	17.2807	22.1627	18.8724	24.7592	15.1615	13.7026	18.8706	10.0121	9.42993	14.9729	19.06	18.089417689999998	22.009854269999998	11.9666	13.2612	16.142413180000002	23.1242	28.3423	22.9146	21.0501
DRT type 2	5.71243	8.95777	17.4561	11.0975	14.1445	15.4344	21.0458	19.8703	17.6337	16.5531	15.2374	12.4571	18.8174	27.6211	34.742	29.4657	13.811	16.8094	4.75212	20.803398520000002	10.1624	69.0816	13.964	17.9942	61.4849	54.7443	27.3026	19.4521	15.929	12.3015	8.23618	7.39585	29.166076880000002	17.8296	13.9804	9.16945	25.8355	28.5203	31.296	23.33	25.7883	23.7374	27.325507729999998	31.2807	40.0699	18.5477	27.2461	13.6756	86.2546
DRT type 3	5.29802	1.30918	5.38311	0.984167	5.77799	4.24292	8.210156210000001	3.80366	5.19589	5.609157830000001	13.2783	7.45261	0	0.708601	0	0.531145	0	1.17749	0	0	1.01061	0	4.07631	0	3.84388	2.1425204399999997	1.81731	1.5354638399999998	1.81216	4.09683	4.9849397600000005	1.59593	3.77746	0.500348	0	0	1.40535	2.4137453300000002	2.16463	1.49251	0.468055	2.84373	3.735	2.43939	3.36	2.57168	4.50975	2.7065102999999997	2.42482
DRT type 4	0	0	0	0	0	0	0	0	0.613249	0	0	0	0	2.05516	2.95966	1.6612	0.888612	1.4189660000000002	2.4443	0.672786	0.55708	0.596703	0.575356	0	11.7849	6.52192	4.48608	2.2083741000000003	1.7904	1.51428	0	1.60517	4.21964	0	0	0	5.44347	8.13311	6.31216	4.30343	1.28712	6.12672	8.16863	9.449889240000001	14.469442840000001	2.81422	4.84585	0.32329	7.21313
DRT type 5	1.21405	0	1.54455	0	2.37477	0	1.57818	0.962053	2.50288	1.4208578200000002	1.14858	0	2.39412	2.32644	3.36809	2.83406	2.5926	1.63548	0	0	0	4.50106	0.516322	0.954519	0.911844	1.34206	0	2.3669	2.51341	0.5289	1.0006	1.28007	0.932437	0	0	0	0	0.461064	0.7749723100000001	2.34973	1.67405	1.65129	0	0	0.469859	3.20895	2.5477	1.5668	1.35903
DRT type 6	0	2.19876	0	19.3087	0	6.33468	0	0	3.00065	0	0	0	0	0	0	0	0	0	3.36825	0.583349	0	0	0	0	20.6976	14.0899	14.634553499999999	9.53344	5.29619	6.289206500000001	0	0	0.687342	0	0	0	2.23003	2.8519598399999997	4.58443	0	0	0	14.487003399999999	15.8069	17.494109610000002	9.737587730000001	9.68029	5.93947	3.13949
DRT type 7	0	0	0	0	0	0	0	0	0	0	0	0	0	0	0	0	0	0	1.4169	0.902891	0	0	0	0	11.402	3.46617	4.73709	1.10752	0.802104	1.9046	0	0	0	0	0	0	1.22464	2.25099	1.53364	0.49673	1.13056	0.583917	9.23026	7.31035	8.853271470000001	3.8607	3.5563675000000003	2.16359	3.52812
DRT type 8	0.469057	0	0	0	0	0	0.310426	1.32391	0	1.5859	0	1.47745	0.643159	0.312276	0	1.82889	1.92145	0.935336	1.01629	0.432703	2.63966	0.560568	1.46532	110.23	0	0.60728	0	0.503627	0.433037	0.657107	0	0	0.749892	0.936822	0.367607	0.487408	0	0	0	4.73782	4.3493	4.31038	0	0	0	1.8696720900000001	1.84303	1.68458	0.714885
DRT type 9	0	0	0.589686	0	2.09143	0	0	0.904245	0	0.662264	0	0	0	0	0	0.476646	0	0.806169	0	0	1.53091	0	0	0	1.63489	2.15113	0	0	0	0	0.952831	1.35682	2.7131	1.9474	0	1.22066	1.12527	0	1.38941	0.343331	0.618627	1.33361	1.07837	0.580424	2.27529	0.553996	0	0	0.543153
DS-1	2.33772	0.981851	1.83645	0	1.10315	0	2.22519	0	1.6225	0	2.7684	0	5.3175941700000005	4.81842	9.66884	5.26328	4.32979	7.30266	72.3945	11.2985	12.832	7.16571	1.9287941800000001	0.893042	4.533645440000001	2.16053	1.36068	3.68445	1.9371444999999998	0.872875	6.67149	4.65019	16.6625	1.8783805700000002	1.53974	1.89569	5.10271	3.48558	3.85717	2.82409	0	0.869063	2.7898777299999997	2.10118	1.14563	1.09556	3.34813	2.56426	4.18659
DS-10	3.47712	6.12521	1.30477	1.32487	1.70457	1.06191	5.74884	4.006251560000001	5.89385	5.71016	5.05136	2.9969	0.820071	1.1537	0.558007	6.45011	3.9123824700000003	1.8748	4.56801	7.338720780000001	3.18866	0	7.24799	0	0.640356	2.0353820099999997	0	1.8	1.30791	0	0.861993	0.67373	3.76852	3.66434	1.32675	2.39601	1.25816	1.15815	2.04693	1.14093	0	1.90787	0	0.760243	1.29787	2.67551	3.30222	0.669458	4.51226
DS-11	0.788104	0.493187	2.25434	0.55025	0	0	0.665007	0	0	0	0.94061	1.08516	0	0	0	0	0.519575	0	0.854357	0	0	0	0	0	0	0	0	0	0	0	0	0	0	0	0	0	0	0	0	0	0	0.7863007799999999	0	0	0	0	0	0	0
DS-12B	7.65242	28.5066	15.5697	45.4922	14.8356	26.0465	11.2815	17.934991240000002	16.5958	12.0221	5.54065	7.79417	2.61866	11.3065	6.86962	9.37783	6.85886	6.968174729999999	3.33699	2.53321	1.55136	1.67798	5.6985	1.9553318800000001	42.1494	39.7758	32.8169	38.2689	32.7628	34.8385	3.17937	10.9511	13.1037	28.4266	19.8422	13.9908	12.7735	20.6977	32.1105	12.8551	13.39	17.1283	44.7672	43.8089	54.0462	33.8144	45.967	33.9013	6.12344
DS-14	2.51046	0.675185	2.85119	0.555068	2.90124	1.47981	4.40182	2.6911747999999998	3.8358337000000002	1.71147	5.6023323000000005	1.23072	1.47392	1.14877	0.864666	3.09179	1.3778	1.6554220000000002	1.95634	1.2256	1.01773	0	0	0	3.74336	18.524195409999997	9.983806600000001	2.44665	2.06216	0.540954	0.664576	1.9623	6.44029	3.18623	1.8441584500000001	3.3960267799999997	13.7122	14.5096	18.263910109999998	3.23343	3.2977652099999997	2.25103	3.59108	9.450078000000001	12.2289	2.11508	3.84101	0	19.465992800000002
DS-15	0	0	0	0	0	0	0	0	0	0	0	0	0	0	0	0	0	0	0	0	0	0	0	0	1.33744	0.66705	0	0	0	0	0	0	0	0	0	0	1.31087	1.55808	1.117	0.377793	0.838477	0.677833	1.66361	2.14572	1.56744	0	0.58577	0	3.02299
DS-16	0	0	0	0	0	0	0	0	1.67675	0	0	0	0	0	0	0	0	0	0	0	0	0	0	0	0	0	0	5.23667	2.9815	0	0	0	0	0	0	0	0	0	0	0	0	0	0	0	0	0.772209	0.603096	0	0
DS-17	1.9248363099999999	0	0	0.809911	0	1.68618	1.27015	5.5376	8.80378	8.4775	0.720785	1.7341868800000002	13.8579	10.8066	19.8705	13.160432069999999	10.359099800000001	10.809	8.78827	10.7397	18.766214599999998	86.29826646000001	16.021831300000002	31.2367	6.7912253499999995	12.0392	3.68031	15.4895	13.822	5.021697469999999	19.4985	16.0946	33.8357	2.1731	0.64369	0.988223	5.5176088199999995	9.9348	7.38343	16.868368189999998	14.8811	14.6121	3.97287	6.043309730000001	8.10627	13.701770269999999	12.2581	8.49318	7.09787
DS-18	0	0	0	0	0	0	0	0	0	0	0	0	0	0	0	0	0	0	0	0	0	0	0	0	0	0	0	1.1724	0.891494	0	0	0	0	0	0	0	0	0	0	0	0	0	0	0	0	0	0.428216	0	0
DS-19	0	2.17681	0	0	0	0	0	0	0	0	0	0	0	0	0	0	0	0	42.4783	0.857355	0.634202	1.54764	0	0	0	0	0	0	0	0	0	0	0	0	0	0	0	0	0	0	0	0	0	0	0	0	0	0	0
DS-20	4.37364	7.12874	2.6898874200000003	4.59649	3.42092	5.70272	6.56873	6.73355	8.93759	5.1612	2.6837661500000003	1.6309112899999998	0.725963	4.44622	0.845531	2.45041	3.44974	0	0	5.09965	1.74767	0	0.995552	0.455634	12.4485	12.6917	8.93149	12.193556449999999	9.774246589999999	9.73422	4.57972	8.25804	1.98243	4.09532	6.24528	1.3267986999999999	3.91095	6.52582	10.4215	7.200921119999999	5.580315929999999	8.38335	15.0768	13.0607	14.7436	4.21031	12.0475	8.44313	4.35327
DS-22	1.26826	0	1.7072	0	1.53826	0	0.428065	0	0	0	0.832521	0	0	0	0	0	0	0	0	0	0	0.717451	0.26282	0	1.33975	6.820861659999999	3.0140011700000002	0	0	0	1.32061	0	2.14779	0	0	0	5.22014	5.575797700000001	5.47768	0.742127	1.9963482899999998	1.28812	1.70574	6.79665	7.45037	0.600194	1.61461	1.37444	8.29237
DS-23	4.53695	6.61851	8.532281750000001	5.57121	10.2243	6.84318	8.46389	6.16455	7.10756	5.81546	7.5131963200000005	4.50905	3.96902	9.22812	9.87979	19.1638	29.1495	22.997310680000002	0	0.595886	0	0	0	0.697812	17.3464	18.0329	10.815876750000001	14.0601	14.9769	14.5843	2.78875	8.60594	7.58679	9.493100010000001	6.94939	1.79976	2.13766	3.0567663499999997	4.175060820000001	4.0499139600000005	2.54475	7.3693	18.3572	18.7304	22.4279	18.204777710000002	23.8595	18.4702	10.1858
DS-24	1.45116	2.00594	0	0.512217	0	2.25088	1.20323	2.5868637999999997	1.5641	2.66671	0.437797	1.62318	0.848892	1.54346	2.48219	0.612324	0.963593	0.823809	0	0.549006	1.4223	1.61661	1.95285	4.28509	0.376374	0.826832	0	3.92957	4.19893	1.3043188799999998	0	1.7283	3.30282	0.541501	0.977425	0.388789	0	0	1.2615168300000001	1.31884	1.4426817600000001	2.1258241499999997	0	0	0.587685	2.11313	3.76384	1.01128	4.42015
DS-29	0.731514	1.1511	0.608473	0	0.75913	1.83891	0	3.16704	3.04069	0.823044	0	0.429488	0	0.471124	0	0	0	0	0	0	0	0	0	0	4.591594000000001	6.86028	2.9857	3.43073	4.716433690000001	5.30393	0.729409	2.07674	1.50927	2.7254	0	0.846747	2.7031549000000004	2.85742	3.43521	1.32889	0	1.87774	11.7639	12.4104	13.4717	7.22542	8.05073	3.44891	3.3764
DS-3	0.7155936199999999	2.21696	0	1.90912	1.56655	0	2.29953	1.46636	1.24858	2.6372858900000002	0	1.54794	3.2267	2.6799842700000003	1.9856320799999998	6.38027	2.58362	3.40491	0	5.38248	2.7840837499999997	0	3.04457	10.8129	1.32619	1.59781	2.74419	0.67708	0.831683	1.0601	3.30642	0.79642	1.46177	1.38999	4.8273	1.66749	2.48874	1.9078880100000002	4.777936889999999	2.84085	0.730605	2.30521	0	0	0.460263	0.750569	1.5469	0.799655	2.41481
DS-31	0	0	0	0	0	0	0	0	0	0	0	0	0	0.49526	0	0	0	0	0	0	0	0	0	0	0	0	0	0	0	0	1.06848	1.6577	8.17476	0	0	0	0	0	0	0	0	0	0	0	0	0	0	0	0
DS-32	2.90599	3.87011	6.43846	2.76827	10.934777799999999	3.9170119899999998	4.47627	12.787	4.97322	11.496234649999998	2.63485	5.80413	13.6386	12.0836	11.9706	15.8504	18.7421	9.304570029999999	2.60339	3.6623868600000002	8.26304	2.94622	6.93918	30.9106	26.3527	15.1333	12.7476	3.74576	5.97243	3.43509	5.44819	7.13671	3.42341	6.82416	4.76209	8.40398	15.6081	18.0628	18.2421	6.45041	9.0476	7.933422050000001	21.405	25.7778	22.867158579999998	9.90094	11.6647	7.82116	24.2528
DS-33	1.12695	2.46832	1.21359	1.57366	1.43522	1.71779	4.476	3.31651	6.52034	2.27058	0	1.72414	9.92914	11.8602	29.6539	13.921	9.97657	13.953404500000001	0.796565	0	0.77432	1.17539	1.18662	0	0.578159	1.97402	0	14.2374	9.971201690000001	6.7768	11.6809	11.1897	15.1126	12.8432	7.56731	7.24639	1.44259	2.33965	3.64469	6.6346	7.69468	9.09973	1.72598	3.13563	3.21989	10.4162	10.5503	8.04739	3.11032
DS-35	1.8177	0.499551	0	1.3947492700000002	0	0.573377	1.41803	0	0.575836	1.54216	0	0.603055	0	1.03318	1.9607	0.656811	0	0	0.338218	2.3593318500000002	2.43494	0	1.3385642500000001	19.8454	0	0.644111	0	0.850651	0.390568	0.492084	0.496858	0	3.1061023100000003	0.529332	1.44156	0	2.36028	2.10742	2.44779	2.14102	1.70096	2.6366579999999997	0	0	0	0	0.765636	0	2.3614
DS-36	0	0	0	0	0	0	0	0	0	0	0	0	2.33479	1.94893	1.53385	2.9527880399999997	4.93849	4.24959	0.98248	0.447729	3.6378681200000003	4.4343941000000004	3.58398	145.195	0	0	0	1.3969266999999999	0.909156	0	0	0	0	1.6036	0.663036	0.813996	0	0.669656	0	2.69295	2.13841	3.33528	0	0	0	1.53129	2.46581	1.87725	0
DS-37	0	0.744086	0	0	0	0.881042	0	0	1.16166	0	0	0	1.04142	2.03434	5.2669	0.770167	0	0	0	0	0	0	0	0	0	0.8516813999999999	0	1.56521	2.00108	0.781458	2.13044	1.59079	2.6340836199999997	0.981705	0	0.618289	0	0	0.642512	1.4917	1.45479	0.9595586899999999	0.781741	1.73903	0.58335	1.1619	1.87841	1.65051	0.374741
DS-38	0	0	0	0	0	0	0	0	0	0	0	0	0	0	0	0	0	0	0	0	0	0	0	0	0	0	0	2.0263	0.859291	0	0	0	0	0	0	0	0	0	0	0	0	0	0	0	0	0	0	0	2.56762
DS-39	0.377489	0.710875	0	19.6345	0	2.42495	0.404821	1.61721	2.2649528300000004	0.618182	0	0	2.61085	2.269	2.96831	2.8750225599999997	2.64669	2.24284	0	0.308699	0.9996463499999999	0	8.41598	0	7.85522	7.283848219999999	4.8196407599999995	2.95838	2.1299924199999998	4.2995	0	0.577067	0	1.69244	2.5933194299999998	11.8473	1.8141123000000001	1.5670519500000002	4.10078	2.5716034800000003	4.06119	3.76323	5.88855	8.9868	9.19836	4.33931	6.77135	5.84898	6.2291
DS-4	4.25743	6.55348	2.93019	2.89139	4.71215	4.19535	6.01652	3.37104	5.03966	4.46186	3.27033	3.51486	4.385488710000001	8.60576	7.3780491800000005	8.06814	8.42041	7.57094	2.03694	1.4031972700000002	5.49738	2.97967	4.02593	2.62299	4.15353	5.8113	7.72361	4.28162	5.28553	6.75802	0.69096	4.94172	3.70522	5.928773870000001	6.43845	1.8650399100000001	0.706373	0	6.28848	6.93176	7.45826	9.26598	2.89264	2.52906	4.52273	5.2979208700000004	9.78373	6.06916	1.73632
DS-40	0	0	0	0	0	0	0	0	0.535915	0	0	0	0	0	0	1.41937	1.93716	0	0	0	0	0	0	0	0	0	0	0.406819	0	0	0	0	0	0	0	0	0	0	0	0	0	0	0	0	0	3.26364	0.766409	0	2.70727
DS-41	1.3991	1.90366	0.616659	1.62755	0	1.85132	2.97057	1.52541	5.20368	1.66354	0.751789	0.770954	2.6392660699999997	4.56849	3.07363	3.41205	1.6244960600000002	0.76356	0	1.74382	0.674492	0.450066	1.35665	0	7.93415	5.95188	4.59317	4.72539	6.5368116999999994	6.76772	1.6828649999999998	1.4799247599999998	1.7052457699999999	7.735	6.43868	2.1332504500000002	0.991744	2.136	6.32398	4.61459	5.2633002399999995	5.92786	7.41814	6.28155	9.39662	3.24124	8.20742	5.77513	1.7345805300000001
DS-44	3.08212	1.56849	0.72461	0	6.91288	1.69787	3.3585422100000004	1.67434	3.42548	2.3180957099999997	0.64247	1.75734	0	1.957	0	1.28019	0	1.16026	0	0	0	0	0	0	0	0.276464	0	4.0815383899999995	5.0188	5.22457	0	0	0	3.9503878300000004	4.6778100600000005	0	0	0	0.801488	1.18068	0.852063	1.99035	0	0	0.886372	0.305129	5.84451	4.59382	0
DS-6	19.8422	14.7935	23.4045	4.93325	21.7329	5.34252	19.222822230000002	4.40575	6.49372	9.519996560000001	20.1404	6.7186	13.0444	28.4279	9.64515	9.80691	6.92848	6.023	16.99	5.946355179999999	7.11115	11.9006	6.9543	10.7326	21.3349	11.5457	10.8957	3.19855	4.39549	1.57582	3.6436	7.34362	6.3896	7.13096	0	0	14.5654	19.3246	16.493	7.91708	12.2142	12.9862	21.3174	21.3255	21.5054	12.0925	9.313840769999999	4.04782	29.9552
DS-7	0	0	0	0	0	0	0	0	0	0	0	0	0	0	0	0	0	0	0	0	0	0	0	0	0	0	0	0	0	0	0	0	0	0	0	0	0	0	0	0	0	0	0	0	0	0	0	0	4.5267
DS-8	11.8275	26.2639	12.5361	17.2231	18.003210420000002	20.0837	14.321233370000002	14.3053	18.7897	9.97068	11.1921	8.61369	10.6244	21.2859	15.4985	17.890178679999998	20.0019	21.0751	6.649388500000001	9.43537	53.379173230000006	47.8816	15.688	21.4594	28.2143	26.7801	16.8711	19.6548	22.072	20.032125399999998	15.4971	27.3934	12.2802	24.7724	16.5931	12.0095	6.74283	6.24799	16.7348	21.5141	25.7057	28.640594959999998	21.4591	20.2199	22.4982	20.857	29.1345	17.7241	16.6069
DS-9	0	0	0	0.525687	0	0.608613	0.770086	0	0.500331	0.38486	0	0	1.35774	0.857703	0	1.0595	0.764176	0.65881	0.671959	0.39932	0	0	1.32882	0	0.397977	0.479585	1.23731	0.424784	0	0	2.04744	0.717917	1.07379	0.970021	1.86035	1.01567	0.876187	1.3263	1.03562	0.673377	0.539252	0.526757	0	0	0	0	0.298134	0	0.472279
DUF4238	0	0	0	1.92852	0	0.95689	0	0	0.833071	0	0	0	0	0	0	0	0	0	0.500109	0	0	0	0	0	1.20236	1.84962	1.40498	1.02452	1.64813	1.46736	0	0	1.29736	0	0	0	0.952403	0	0.678441	0.295872	0	0.193124	2.02973	2.55073	2.19221	1.54036	1.65767	0.825345	0.416908
Damona	0	0.54408	0	0	0.434761	1.34597	0	2.2519	2.10319	2.19047	0	2.40166	0	2.1707152599999997	0.963917	1.18589	0	0.644016	0.893802	2.20548	0	0	0	0	0.520384	1.28198	0.771793	2.46862	3.1815450800000002	3.02647	2.75818	5.69458	4.6582	3.3745230999999998	3.45063	0	0	0.639277	0.704713	1.43153	0	1.06512	0	1.15196	0.750409	3.54433	5.10087	4.997992699999999	1.38728
DarTG	29.6106	49.8433	35.2128	44.1778	58.352	38.2411	53.9888	57.9122	60.2731	45.94	36.3053	32.7082	60.3859	88.365	128.952	101.767	94.17894229000001	91.0999	26.2416	24.5286	25.7836	16.4067	35.3287	18.1068	47.9027	51.0338	39.6319	76.81	71.6731	58.8091	74.6954	80.0106	113.28118636999999	97.4409	78.1424	122.24326337000001	39.137266600000004	43.7328	59.728209039999996	60.2905	57.6886	71.5054	41.1988	49.2638	54.5911	71.7944	93.5368	72.1089	50.646
Dazbog	0	0	0	0	0	0	0.511198	1.47184	0.868861	0.754574	0	2.05549	0	2.6704529200000002	0.45339	0.38753	0.52125	0	0	0	0	0	0	0	1.41581	0.682986	0.845379	0.67608	0.866561	1.0958	1.6093316800000002	7.60817	5.92079	1.17508	1.04827	0.723396	0.720948	1.28619	1.20973	0.8576475699999999	0.721028	2.32368	1.5095	1.67899	1.40802	0.641018	1.62453	0.74392	0.693455
DdmDE	3.72637	11.2093	6.0736021000000004	7.41186	7.097887200000001	7.70413	5.259410600000001	11.091849199999999	13.0807	5.47903	3.0946154999999997	5.46265	1.07092	2.23128	1.75331	3.25602	2.91329	2.9917933999999997	0	0	0	0	0	0	5.1096582999999995	3.2907273999999997	3.22148	13.3517	16.6477	18.195831400000003	1.69752	3.9912419999999997	1.87337	6.93776	4.8005493999999995	4.57604	2.69407	3.201	7.78081	5.9724129999999995	8.58038	9.503392609999999	3.46031	2.68637	6.31019	12.771004999999999	20.5299	16.9757	1.56332
Detocs	1.66106	3.66227	2.36716	1.44055	0.534427	2.45026	1.77799	2.02423	2.4877	2.3208	0.635034	0.586767	0.95958	1.83749	1.4519547899999998	1.82164	0.408464	0	1.1058	0	0	0.407366	2.28204	0	6.93914	7.75672	5.21377	7.4081236399999995	5.87553	4.45915	0.729425	3.5034373700000003	7.92997	9.14704	5.64913	22.273176999999997	0	0	0.67244	2.0665	1.61054	3.23543	6.16265	6.95898	9.64499	7.70363	11.848935070000001	7.57274	0
DndABCDE	0	0	0.536182	0	0	0	0.408601	0	3.20627	0	0	0	0	1.5330210800000001	3.1036	2.16232	0	0	0	0.52807	0	0	1.21815	0	0.544937	0.981174	0.726091	10.7408	5.97264	2.3572	1.38761	0	0	0.706715	1.2149	0	0	1.14377	0	0.349007	1.49248	0.35925	0	1.55678	1.00956	3.0183294700000003	5.3437752199999995	2.3746	0.474596
DndFGH	0	0	0	0	0	0	0	0	0.883467	0	0	0	0	0.614822	1.77962	0.805038	0	0	0	0	0	0	0	0	0	0	0	2.81425	1.49992	0	0	0	0	0	0	0	0	0	0	0	0	0	0	0	0	0	0.776439	0	0
Dodola	1.0786545699999999	0	0	0	0.421452	1.02784	0.952053	0.622446	0	0	0	0	1.28662	1.15624	0	0.548403	0	0	1.16091	0.488482	0.545711	1.9025	1.60283	0	0.904265	1.82837	0.636205	0.558705	0	0	0	0	0	0	1.25922	0	0	0	2.5049300199999998	1.78896	0	1.9468394199999999	0	1.26773	2.2410932199999998	0	2.18802	0.594988	0.5219818300000001
Dpd	0.82672	1.98705	1.9562608799999999	1.19846	1.75878	1.5967864600000001	1.39688	3.94508	3.3211	2.39778	1.1570178700000002	0.682895	0	1.02021	0	1.31252	0.786117	1.3122944200000002	8.5308	1.23227	0.851775	0	0	0	7.41432	5.36295	3.49954	3.8628	5.4587	5.44109	1.35972	1.25689	0.881955	3.08679	1.5567891600000001	0	2.10835	3.29277	3.58725	2.17052	2.70978	2.85945	4.23073	3.6917777899999997	4.8284898599999995	4.143453689999999	6.67993	5.10262	0.325165
Druantia type I	3.10717	1.52354	2.46033	0	1.70224	0.715116	2.98814	0	2.1300443600000003	0.611718	3.37927	0.74901	0	1.40573	1.92843	1.03148	0.86088	0	0	0	0	0	0	0	0	1.11948	0	1.3214973099999998	1.25193	1.38098	4.4356	2.5269	2.11004	0.5447	0.552047	0.640376	0	0	0.53299	0.596848	1.3765439499999998	1.11244	0	0.775758	0.568346	2.3082760999999996	3.2499857000000003	1.71425	1.84053
Druantia type II	0	0	0	0	0	0	0	0	0	0	0	0	0	0	0	0	0	0	0	0	0	1.44499	1.1901	3.14718	0	0	0	0	0	0	0	0	0	0	0	0	0	0	0	0	0	0	0	0	0	0	0	0	0
Druantia type III	6.791154199999999	0.727936	3.4959361999999996	0	2.4254955999999996	1.08599	4.32145	2.157	7.58487	2.76007	5.8401	1.4818266100000002	8.16225	9.76529	16.1425	7.80153	5.2854252200000005	7.4738465199999995	35.4806	13.721533130000001	3.25304	10.8127	2.59667	3.6310770299999997	5.21986	7.62997	0.665704	13.5104	11.5421	6.65097	8.311666129999999	12.0919	24.412	5.19049	1.8659	5.19644	10.0684	16.0062	11.2382	17.3058	16.4505	14.8385	3.2397	2.94809	6.11059	19.7404	9.110457499999999	6.86996	9.04998
Dsr1	0	1.32613	1.10795	2.63712	1.1144489499999999	1.26384	1.37389	3.37252	3.77065	2.20758	0	1.4492622499999999	0	1.62234	0.848268	0	0	0	0	0	0	0	0	0	4.40364	7.14204	3.92366	6.3387875000000005	6.81033	5.86207	1.6775943400000002	2.85217	8.75647	3.93921	1.24161	0.811526	0	0.62595	1.38251	2.3397	3.27835	3.01682	3.5182	3.80165	7.14609	8.16541	8.78464	9.04975	2.02686
Dsr2	2.15455	0.623701	0.814548	0.57728	1.6294754500000002	0.634786	3.83531	0.672972	1.25987	0.559596	0.438585	0.682222	4.99757	2.64644	0.736184	3.58385	3.4928	2.8217158600000003	1.6711138499999998	2.7413046999999997	3.87202	1.74027	9.659722030000001	12.8908	1.25859	1.49528	4.07605	1.3039797499999999	0	0	0	1.65789	1.29094	2.29841	5.7952753999999995	3.21198	5.66757	4.4224	3.45711	5.28	2.79672	2.67227	0	0	0	0	1.2982	0	3.8346526599999997
Dynamins	0.403445	0.550167	0	0.704208	0	0.599222	0	0	0.443066	0	0	0	1.98619	3.168	4.00042	2.16942	1.3147447799999998	1.40826	2.1855675900000002	1.73616	2.73872	1.07579	0.613501	1.1925	4.20713	3.99178	0.460246	2.2201117100000003	1.91768	1.7068	6.15776	6.021652380000001	5.4118355099999995	1.7752	0	0.629888	0.811171	2.1501	1.59603	2.2595	0.525286	2.28974	2.5541	3.6329490399999997	4.04541	1.66886	2.3042221300000003	1.68045	4.17041
Eleos	11.0389	29.3929	16.1001	31.031997330000003	15.8417	25.0304	12.7743	19.1187	21.525	13.891	13.4345	8.30606	7.3658	13.9212	19.075	12.4487	8.0436	12.0455	3.5648171900000003	25.036408230000003	4.18466	7.46222	7.19108	5.50556	30.3796	31.1685	19.8408	27.4021	31.1819	29.8413	14.1058	14.9534	18.8792	21.0738	19.5621	10.5829	13.8703	21.6683	30.3029	21.3078	20.998236740000003	29.703784980000002	26.7123	29.049438350000003	35.4094	33.7492	45.4078	36.0824	17.973
Erebus	0	0	0	0	0	0	0	0	0.656025	0	0.569387	0	0	0.764981	0	0.8781335299999999	0	0	2.26803	1.2737708699999999	2.35569	8.51321	2.81249	3.11291	0	3.49063	0	4.53191	2.86664	0.762976	0	1.15391	13.4404	0	0	0	0	0.665118	0	2.64966	1.67994	2.79665	0.755298	2.08537	0.98633	5.4963	3.81974	1.16569	5.94042
Esos	3.44706	9.49564	1.93945	3.85823	3.47391	4.35776	3.49714	5.6351	4.42703	4.08148	3.61201	1.58004	7.64136	6.6237	21.5915	6.89488	2.84142	7.2647	7.71896	6.65073	30.1914	1.40883	1.7146	1.79766	1.41105	7.0223	1.03812	7.56326	5.05087	1.4654577899999999	3.93594	4.8525	18.756	3.5422	5.57754	3.82046	3.49582	4.3916	4.77492	4.60681	3.12976	4.40292	1.1544	9.67144	4.5291	11.5578	7.50524	5.64196	12.1377
GAPS1	5.42132	0	2.88145	0	2.85885	1.09537	3.4877903000000003	0	0	0	1.30366	1.54798	0	0	0	0	0	0	0	0	0	0.583233	0.96856	0	0.268622	0	0	0	0	0	0	0	0	0.596275	0	0	0	0	0	0.628409	0	0	0	0	0	0	0	0	1.0931
GAPS2	0	0	0	0	0	0	0	0	0	0	0	0	0	0	0	0	0	0	0	0	0	0	0	0	0	2.14968	0.517585	0	0	0	0	0	0	0	0	0	0	0	0	0	0	0	0	1.25894	1.79231	0	0	0	2.31779
GAPS4	1.64493	1.41044	3.79525	0	2.3191109599999997	0	4.11813	0.598303	1.27582	2.33289	2.71301	0.641862	2.31751	4.09034	1.8365145200000002	3.30956	0.988199	2.0157103999999997	2.89482	7.42197	7.67698	6.62603	6.46875	9.01863	10.3017	4.47258	4.9476591800000005	2.6025	3.52018	2.04006	6.00884	4.00186	4.94466	0.653495	1.60899	0.665386	6.64684	8.5569	7.6066	4.38944	4.92669	5.26427	7.41087	7.30122	7.01925	4.92973	6.38019	1.3129	8.2914
GAPS6	0	0	0	0	0	0	0	0	0	0	0	0	0	0	0	0	0	0	0	0	0	0	0	0	0	0	0	0	0	0	0	0	0	1.91594	0.855851	3.798	0	0	0	0	0	0	0	0	0	0.849673	0.764754	0.883161	0
GIY-YIG	0	0	0	0	1.21034	0.552191	0.95579	0.846612	3.4780957299999997	0.606405	2.03271	0	0	0.762266	0.94938	2.46731	1.86856	1.04326	0	0	0	0	0	0	0	0.726092	0	2.0869	3.19838	4.5659573899999994	0	0	0.537945	0	0.794255	1.34031	1.30843	1.2892	3.31336	4.5821	4.82964	3.63654	0	1.70641	4.5235	1.96055	3.01751	2.43131	6.3353
Gabija	68.0461	58.4899	48.4668	91.616	52.0533	73.727	67.4302	49.979802140000004	61.0959	52.6335	52.2504	45.6865	72.2144	92.3639	136.987	77.0336	66.5784	63.1448	123.217	53.2291	82.7917	180.663	75.849	263.93	95.4886	114.912	69.3631	91.9779	92.1125	58.5804	74.5929	81.5814	118.662	54.6636	47.638996320000004	28.5563	62.3453	88.0091	96.2916	104.452	93.9991	116.119	96.4874	109.009	121.341	84.0271	122.799	92.8166	76.4666
Gasdermin	0	0	0	0	0	0	0	0	0	0	0	0	0	0	0	0	0	0	0	0	0	0	0	0	0	0	0	0	0	0	0	0	0	0	0	0	0	0	0	0	0	0	0	0	0	0	0	0	0
HEC-02	65.8427	62.037553790000004	52.651	39.601	55.6007	39.3503	70.2016	52.8842	54.4081	49.1935	62.6065	35.4724	38.6824	57.4393	52.0441	55.6998	44.7649	40.2988	9.996900969999999	19.4205	24.6961	29.395561569999998	22.1508	23.7033	44.2629	36.8486	28.3141	35.493006539999996	33.4786	22.3424	61.1684	42.5889	31.5608	50.688208780000004	34.0747	35.1846	29.308	37.9932	41.7576	63.5914	60.1646	76.8047	41.6157	26.329152710000002	39.3941	36.8113	40.4894	22.5605	48.8086
HEC-03	34.1578	32.0277	20.2715	13.624	20.5031	22.2391	18.3029	15.814991019999999	20.985	14.2866	12.61	12.4112	23.0568	28.6539	31.2822	35.0214	26.9118	27.0649	7.45828	16.6608	19.9921	16.62	16.6844	9.698591019999999	64.6844	41.9588	42.6669	31.6842	29.6676	15.2536	21.269804989999997	25.4301	28.4093	37.3205	17.2393	18.7089	33.4415	49.2639	53.243574960000004	39.1598	44.9058	60.6432	63.3052	27.7824	42.0128	26.5392	29.0969	20.0479	33.6279
HEC-04	2.08029	3.36896	2.68252	0.534779	3.07087	0	2.47539	2.1689	4.1608	3.72447	0.704235	1.359	6.79334	8.51506	20.8769	11.0871	10.5524	12.816	1.3351633399999998	4.00315	3.7569900400000003	2.70151	13.5128	0.881802	2.90687	6.34781	2.31442	9.58956	6.97072	6.73837	7.27509	9.978185980000001	20.6841	7.58875	6.5885	5.21478	3.15648	4.39387	5.40756	6.8081340699999995	6.60943	9.57361	2.6231	6.702814099999999	5.22443	21.5813	18.5991	13.8398	1.71311
HEC-05	17.9168	21.2076	15.700115610000001	17.688314379999998	17.155203619999998	22.8034	22.9626	20.1537	27.5307	13.4112	14.834269110000001	15.3024	12.8031	17.2151	32.093	17.1121	16.67	16.6346	69.2133	13.4018	10.262	12.291	6.7819	17.4479	42.479671689999996	51.0943	32.2506	39.2025	34.3732	33.9988	21.0133	21.1087	45.4368	23.659	30.1649	66.4897	20.7566	26.837722369999998	39.3184	33.3349	31.4344	33.2701	41.8103	45.1732	59.865	45.0589	58.3111	38.4425	30.8237
HEC-06	152.363	183.705	144.066	123.472	178.275	138.884	166.479	157.636	171.196	149.562	157.119	120.691	127.073	146.717	124.911	132.817	109.418	99.5822	50.0767	52.3983	122.457	248.047	129.73	125.14269929999999	167.308	165.842	117.814	169.197	178.506	158.133	120.49911168999999	146.344	140.796	203.552	156.452	140.938	112.655	139.872	174.47	214.643	204.748	215.633	126.347	122.212	169.486	140.637	220.929	169.41546062999998	179.443
HEC-07	5.59725	2.39677	4.69547	1.83738	2.24771	1.64914	3.63377	1.83476	1.05544	1.99826	2.92283	2.53513	0	2.48641	0.99701	2.77143	1.03326	0.55347	1.49531	1.5668	1.28206	0.562267	0.949252	0	0	0.338484	0	0.545281	0.437595	0	0	0.527735	0.557297	0.9781247200000001	0.758626	1.1242	0	0	0.723967	0.983281	0	1.40906	0	0	0	0	0.415142	0	2.2646
HEC-08	0.788991	2.2973	2.73131	1.50796	0.56936	2.1321245099999997	3.05897	1.8449	5.03941	3.07594	1.8966669400000002	0.405829	4.06783	4.86144	3.04478	8.52118	7.15085	7.16531	0.370742	3.35978	5.74518	0	1.88632	0	0	1.7603	0	6.88723	6.08014	4.65381	2.67527	2.19885	2.74967	7.01065	4.48036	5.06377	0	0	0	2.8193	1.97284	3.89211	0	0	1.57355	5.33979	5.42391	4.1316559999999996	7.42037
HNH	26.9953	14.15	33.5271	16.2978	40.7364	25.2436	32.0645	26.8628	16.7587	19.7372	41.316190569999996	25.1567	8.95074	15.9684	5.70217	14.3818	8.93692	8.56594	4.51623	10.77	16.091773410000002	9.28517	16.5697	5.64284	97.3538	66.9779	55.9152	19.5033	19.2396	27.5951	8.55849	11.7753	14.6728	13.748882140000001	14.7904	10.7168	33.5988	59.091	52.1746	28.0078	22.299463030000002	31.4488	69.8888	54.1428	67.7373	16.8565	35.8709	22.0789	44.1821
HP	0	0.954883	0	0.532682	0	0	1.37821	0	1.30127	0.395051	0	0	0	0	0	0.509432	0	0	1.17844	0	0	0	0	0	8.60226	5.7055653799999995	4.71094	1.51065	2.18252	0.749645	0	0	0	0	0	0	0.727313	1.49414	2.49932	0.335845	0.596837	0.361866	10.2836	9.50551	9.77135	1.12054	2.8053	0.771096	3.20367
Hachiman	8.70803	8.2443	9.02196	4.83386	11.0877	10.3765	11.9293	9.4846	8.0048	11.2154	6.30361	7.7752	20.2552	8.60433	8.300239640000001	10.9752	10.030072279999999	11.21	16.7443	7.9627371799999995	9.271311299999999	1.78881	9.12246	8.66286	8.880567580000001	11.438152239999999	8.68047	10.6233	10.456	8.88112	9.469509460000001	6.72826	12.3099	13.5665	19.9012	12.9389	7.10808	7.51899	11.7092	14.3379	12.9737	13.8523	8.23376	10.3725	10.9171	8.27903	13.8963	11.478579100000001	6.83287
Hachiman type I	7.741499070000001	8.23932	3.9396186600000003	9.51279	6.43678	8.31119	10.156	4.99241	7.07706	5.88815	6.17389	3.8863	6.19606	12.9284	8.43938	5.61642	6.28522	5.79778	1.86723	4.08689	6.42302	5.2246	8.90751	5.10829	5.791946719999999	7.12155	6.50402	7.95977	7.43994	7.99081	5.60403	17.0106	9.46804	7.78372	6.01776	1.85252	1.7317563900000001	3.48276	7.3933725699999995	13.9379	7.6625057299999995	15.8248	4.68351	5.33597	6.97439	8.639496730000001	12.8899	10.2962	4.75402
Helicase-DUF2291	0.549976	0	0	0	1.61207	0	1.51561	0.550451	2.0889742399999998	0	2.3173809899999998	0	6.29711	2.49894	3.22481	2.19587	2.2134756600000003	2.3738	0	0	0	0	0	0	0.812904	2.62088	1.48168	1.4867009500000001	0.583927	0.709471	1.8439420899999999	2.07549	1.8106	0.424313	0.519665	0.648491	3.90176	6.40561	5.2981487099999995	2.32776	2.16888	3.00672	0.389591	1.6690679099999999	2.62761	0	0.844059	0.630223	9.1381
Her-DUF	0.242631	3.50524	0	0.46249	0	1.1576158300000001	0.284353	1.72837	0	2.2552928000000003	0	2.1463889800000002	1.16924	1.7818046600000002	1.61097	1.84102	0.6766	0	1.58754	0	0	1.94824	0.463897	2.88982	4.38748	3.81624	6.928118700000001	1.61483	0.544986	0	0.528086	0.353452	0.545668	0.470709	3.32288	0.913397	4.49866	5.89052	5.90719	4.45351	3.1253	4.27879	4.53876	3.5883296400000004	4.39326	1.56867	1.46304	0	8.471165169999999
Her-SIR	38.1844	42.9201	46.5633	70.4684	49.895	46.1288	57.3782	27.7569	34.8045	28.2927	62.0611	31.307731790000002	45.5902	55.301908319999995	70.3134	56.6894	35.9504	39.8256	17.257807760000002	27.6997	28.8414	70.2839	37.5244	50.6326	50.332	64.0565	39.1848	48.461	44.7989	41.2006	26.5508	44.2937	75.8668	38.3442	30.5282	19.5474	28.1275	36.201272599999996	65.3322	55.704392320000004	48.5782	55.9479	56.7236	68.6365	75.7615	50.8472	66.8481	43.0137	47.6659
Hhe	1.6438	0	1.35435	0	1.47091	1.32566	1.4453380500000002	1.55586	4.84186	1.15794	1.49216	0	18.7265	12.082528499999999	16.5268	10.656	8.76518	8.49567	1.96605	1.70394	5.36153	22.599175000000002	6.4707571999999995	14.5708	1.82338	5.62475	1.94531	6.18008	6.09755	2.5754290600000003	9.45792	10.755	19.3334	2.30387	3.12743	1.07314	3.1182211000000004	5.42522	3.90124	9.49311	11.496	7.85898	0	1.1180948000000002	2.17881	5.46726	5.01315	3.32648	8.30459
Hma	1.8339673399999998	1.11584	0.64157	1.24495	0.782112	1.33191	3.3704703799999995	1.31295	1.32525	2.08564	0.602305	1.47552	4.14149	7.76412	1.94221	3.50952	2.0638418200000004	1.75004	5.02788	2.1865015000000003	5.4696012000000005	0	1.65684	0	0.625197	0.661844	1.03533	0.851535	0.990657	0.93477	1.2872	1.91972	1.64734	2.35432	2.67746	1.60068	1.62695	1.67632	2.2664	1.56602	1.48724	1.79569	0.601141	0	0.672875	0.638194	1.18972	0.642157	2.12601
Hna	5.66243	9.98997	4.72182	10.7691	3.8695381799999997	14.8698	7.67461	8.15061	6.5294915200000005	7.97861	12.0631	11.4563	2.38259	4.86807	5.27291	6.66942	3.12019	2.54561	4.3815	3.41599	0.842389	4.76969	1.01804	1.59863	18.502306230000002	17.5021	7.461340379999999	7.22045	6.60906	12.4318	5.20361	3.56794	3.16308	7.725677790000001	3.13941	48.4652	7.74291	12.1914	9.990136230000001	5.53254	5.889743600000001	5.24424	16.0927	13.6786	18.4601	11.5844	18.4198	13.3497	5.46984
Hok/Sok	0.250081	0	0	0	0	0	0	0	0	0.280745	0.447711	0	2.2410565399999998	1.74288	1.84792	0.227705	1.08519	0.997932	4.571624959999999	0	2.6388	0.818524	3.69632	0.806142	0	0	0	0.826466	0	0	0	0	0	0.44301	0	0	0	0	0	1.5703758099999998	0	1.7443308100000001	0	0	0	0.711583	0.700241	0	0.300646
Hydrolase-TM	0.427887	0	1.07996	0.821558	1.36233	1.3588	1.20351	0	0	1.20294	1.53206	0	0	0	0	0	0	0	0	0.330389	0	0	0	0	0	0	0	0	0	0	0	0	0	0	0	0	0	0	0	0	0	0	0	0	0	0	0	0	0
Hypnos	0	0.853611	0	0	0	0	1.05798	0.396216	2.9457	0.483644	0	0	6.34927	5.63625	14.9832	6.96615	4.67426	8.43124	0.803466	0.869344	0.47818	1.1122	1.84821	1.58534	0.333239	2.31825	0	8.2961	5.96541	2.79672	3.82139	4.01714	10.8374	5.964298240000001	3.5279304600000003	3.39901	1.15483	1.61823	1.35133	4.6123	2.8918	3.74764	0.58031	2.50677	1.34089	7.516492100000001	7.01446	4.9724653299999995	1.69055
IetAS	27.2786	38.1843	34.3259	26.6793	47.680147319999996	38.8226	51.5621	35.1291	43.4576	42.9933	38.0031	23.7856	32.8436	61.4789	33.980784910000004	54.0395	47.3013	35.2748	22.8096	34.3862	32.673113980000004	156.366	55.2385	76.857	62.5522	62.414601309999995	50.4712	45.0405	43.3714	37.5118	33.2199	40.518886970000004	30.1727	57.0515	43.1325	79.93846454999999	23.0357	30.4727	36.434178349999996	43.4365	33.9155	44.4431	70.3355	67.886	79.5487	40.0575	63.6251	47.6501	44.0631
JukAB	0.324127	0.783266	0.740165	0	0.596719	0	3.65712	0	2.85204	0	0.690802	0	6.68289	6.11248	27.8425	7.97489	6.50265	8.197528479999999	0.842575	2.14087	0.698776	1.70648	1.88421	0	2.5410619199999998	6.0874098000000005	1.11447	4.84139	2.88019	1.80551	5.45803	4.47948	21.705	1.47555	0.381162	0	7.75164	6.847239930000001	5.80973	5.09535	3.97698	4.6356170500000005	3.4226289899999998	2.50949	2.77173	3.0655	2.98923	0.803038	3.83244
Kiwa	8.18144	15.4086	6.5920735399999995	45.3992	13.9416	21.5644	13.6293	10.5817	15.8605	13.0522	10.1802	8.1565	24.0899	25.809829670000003	39.8585	28.3174	23.2684	26.5348	49.089	4.0330739399999995	7.51574	15.9708	20.4151	5.26435	20.587450399999998	23.7401	11.429	26.285411749999998	20.903	14.8836	23.0958	20.006	42.2022	15.2016	15.982	20.093950630000002	13.1447	18.957978580000002	16.8461	24.9965	18.5552	23.641717579999998	18.0521	23.2235	23.5709	22.0831	25.9148	16.7108	16.9548
Lamassu Cap4-nuclease	10.1617	21.1647	8.958024179999999	12.695	13.6266	13.4421	14.8915	14.8866	18.7992	13.6086	9.41277	9.42145	14.4121	19.4335	27.7156	15.132162749999999	13.120199640000001	19.1723	11.3945	11.7211	10.5789	8.33136	18.8727	114.319	26.2371	25.4534	15.2232	24.953214029999998	26.3656	24.0142	14.445402080000001	20.0359	25.155334840000002	23.6349	20.8814	13.7032	6.62853	10.9421	14.3484	23.8717	25.1656	29.819521950000002	23.6831	23.944338860000002	27.1351	23.104	32.5309	29.0485	14.3764
Lamassu DS-30	1.94727	6.32639	5.37819	10.5992	5.73885	9.68991	6.78149	6.70197	6.32988	4.5321	6.44105	5.59417	1.61509	2.22862	3.36673	3.5083	0.803913	1.211	52.755461999999994	2.6037448999999997	1.44165	0	3.76772	1.92463	11.3183	10.848491209999999	7.54466	5.71134	6.36361	7.98128	3.4853347599999998	0	2.55771	7.07134	4.91329	4.666470009999999	0.55398	2.07812	4.58257	4.61654	3.816	4.98226	8.89706	8.75867	8.69461	6.43964	8.93954	6.78448	2.2054019499999997
Lamassu Hydrolase-Protease	1.24861	0	2.60431	2.17506	1.54432	1.92589	3.06025	1.28427	2.56734	1.06697	2.2672	0.523632	3.63929	1.2843601100000002	3.88276	2.10526	2.23887	2.77339	0.357221	0	0.428599	0.416974	3.17815	0.912095	7.0996633000000005	4.9185	4.3457837999999995	3.47776	3.62591	2.39696	0.968779	0	1.41844	2.23662	3.8916	2.24661	0.597947	3.00828	2.73549	2.68948	2.91797	1.66647	9.83172	8.841745940000001	10.4643	2.9385872600000003	5.00458	2.89096	1.73127
Lamassu Hypothetical	0.481688	1.92138	0	1.09838	0	2.99735	0.338709	1.03162	0.489027	1.7881	0.419197	1.76109	0	0	0	0	0	0	0	0	0	0	0	0	0.430445	0.688913	0.761731	0.531227	0.387988	0	0	0	0	0	0	0	1.90192	1.46973	2.18897	3.32103	4.36371	5.81335	0.652544	0.677426	0.880239	0	0.734164	0.635876	0
Lamassu Lipase	0.296962	0	0.978531	1.96538	1.63208	2.4846345899999998	1.8308293399999997	1.44468	1.61031	1.75379	5.03951	1.19261	0	0.5869248899999999	0.930327	0.82256	0	0	3.2253608400000005	6.059780099999999	10.6459	0	0	0	0	0	0	1.09961	0.768853	0.46904	0	0	1.01337	0.629364	0	0	0	0	0	0.577621	0	0.418115	0	0	0.419278	0.908357	0.83621	0.530708	0
Lamassu Mrr	0.467873	1.71666	0	4.466237899999999	0	5.35227	1.7045171399999999	1.81858	6.03853	1.27344	1.21126	2.10532	9.68485	7.27615	12.7679	4.1969	2.5830434700000002	3.7416	0.839623	1.0232	17.1044	0	0.551593	0	3.69868	3.88523	1.30646	15.2823	9.01022	3.04956	2.40691	4.08621	5.6649	3.9126614799999997	3.60272	1.8864	0	1.86065	2.79623	4.60475	3.4591343599999997	4.10702	3.37374	3.61033	4.27069	6.15514	6.854353130000001	3.88054	11.055
Lamassu PDDEXK	0.562891	0	0	0.606217	0	3.0326605100000004	1.99395	0.49701	0	0	2.1469679299999997	0.615246	0	0.565512	0	1.56605	1.14421	0.68798	0.64426	0.528916	0.591978	0	0	0	0	0	0	0.874978	0.9251127100000001	2.0569444700000004	0	0.655991	1.3519	0	0.392829	0	0	0.695604	0	0.769116	0	0.569048	0	0	0	0	0.709673	2.91631	0.35076
Lamassu Protease	0	0.557987	0	0	0	0.647207	0	0	0	0	0	0	0	0	0	0	0	0	0	0	0	0	0	0	0	0.5149	0	0.511508	0.913897	1.06176	0	0	0	0	0.509126	0	0	0	1.06688	0.435117	1.12898	0.743661	0	0	0.667231	0	1.26816	1.15845	2.09111
Lamassu family	16.0713	10.3623	18.2417	9.07478	20.2698	9.87709	19.9704	8.93107	18.2977	8.76852	33.887	8.58228	4.84352	6.61545	8.31754	5.4632948599999995	2.81063	3.5418474399999997	11.9668	4.84404	9.89989	0	6.482	6.35446	8.33237	7.19898	3.2451	16.3266	15.588	12.9657	3.76107	7.5676	7.90251	10.9388	8.00731	8.01077	2.14164	3.07072	4.47739	7.31819	3.70691	6.15694	6.04283	5.18948	8.78417	9.01213	14.036312579999999	14.439	8.85788
Lit	0.42677	0	0	0	0	0	0.726186	0	0.883472	1.1243969200000001	1.68078	0	0.479061	0.416887	1.18988	0.679651	0	0	0.797533	0.557582	0	0	1.6138732599999999	0	4.56574	3.7857666400000003	1.07459	4.12674	1.91503	1.95533	0	0	0	1.01449	0.649415	2.23788	0	0	0	0.7286638999999999	0.933373	1.58668	1.9275	3.1720461799999997	1.5359162899999999	1.8708	2.0411219899999997	0.854153	1.14052
Lugos	0	0	0	0	0	0	0	0	0	0	0	0	0	0	0	0	0	0	0	0	0	0	0	0	0	0	0	0	0	0	0	0	0	0	0	0	0	0	0	0	0	0	0	0	1.55051	0	0	0	0
MADS	0	0	0	0.808466	0	0	0.26229	0	0.778315	0	0	0	0.765636	1.75975	1.32898	1.8380784000000001	1.12757	2.28028	0	0	0	0	0	0	0.913214	0.950511	0.849756	1.71424	1.03847	0.855832	2.24507	1.75844	6.46081	1.6814919499999998	1.56133	0.856602	0	0	0	0.699495	0	0.423839	0.935937	1.07128	0.931219	0.858417	1.18014	1.29114	0.632859
MADS3-4	3.17534	5.19127	4.93156	3.3798	3.39528	3.6098182199999997	3.77964	2.99101	2.16956	2.3243915599999996	4.66203	3.54323	3.2974874499999998	4.98626	7.5678592899999995	6.397551099999999	4.03019	4.98981	0.820227	2.08009	3.36192	1.72484	3.0182729000000004	1.50983	1.78817	2.2874264799999997	0	3.33674	2.16457	0.981858	4.93593	3.74837	9.79542	2.23118	2.39698	0.693672	0.731304	1.21401	1.23112	2.64607	2.09072	2.7751326499999998	0.747182	0	0.922974	1.62753	2.83638	0.609696	6.39347
MazEF	127.376	261.35	156.088	174.40823849999998	197.45903275999999	201.943	181.238	275.411	267.097	177.816	146.428	157.515	81.9852	155.762	171.61840347999998	174.692	164.734	158.177	51.536	41.6858	36.9408	44.73148320999999	69.29176174999999	56.5944	126.675	130.841	111.336	282.4	319.905	339.627	151.716	223.144	110.058	320.071	215.21304242000002	182.34	76.1656	108.954	173.33699312000002	178.261	202.563	227.338	124.241	100.78	155.514	250.01934052000001	388.72	332.171	114.771
Menshen	10.482	24.0061	8.62091	21.3425	14.332784709999999	32.4975	23.1214	21.7771	20.8598	18.8958	19.1314	14.322	19.0289	26.3874	22.5071	21.4616	15.1606	10.8824	2.71787	7.91976	12.8349	0.53872	12.8699	19.9252	53.2858	39.7367	28.1411	31.9884	32.3517	39.7259	19.227181690000002	21.6114	25.2388	19.5561	24.3068	15.1256	13.4782	17.6799	26.8712	25.5623	23.6429	25.1135	40.883117049999996	38.0356	54.7806	37.4212	55.2366	40.3922	28.3152
Mokosh type I	5.16239	7.25527	6.38412	5.492156629999999	10.997874959999999	8.16086	9.806426479999999	8.48478	12.7717	7.15165	8.214108620000001	4.80079	16.946933350000002	16.7166	29.1806	13.9351	12.9499	14.076251300000001	5.77136	9.2732	6.41477	17.0053	10.0864	9.41336	11.9935	13.794586449999999	11.3701	15.310445940000001	17.4525	10.7954	11.2372	14.3901	24.3103	13.2272	8.69547	5.26188	7.51283	12.474	16.0042	16.2512	14.1213	14.6588	8.10105	9.30286	12.8968	12.9985	19.0592	12.559285670000001	15.2344
Mokosh type II	66.2762	49.677	74.6128	32.5494	64.0798	33.6048	62.6483	37.8478	48.5541	60.4175	34.9308	47.4338	49.9736	52.627	43.244	56.4226	45.4325	57.6621	29.3667	71.4818	45.7592	26.4069	79.8871	50.4107	36.4338	47.1203	52.823	39.5272	44.4631	45.1012	53.102	35.3197	44.2547	61.0265	81.1244	83.8535	57.1521	47.6498	65.6957	66.2544	59.378	64.076	25.755	26.8249	35.5728	29.3029	49.5547	32.3183	46.4487
MqsRAC	0	0	0	0	0	0	1.17867	3.2908835400000003	2.6956	2.79916	0	3.13663	13.679	9.18821	8.44899	8.81499	7.65809	6.48091	0.399423	0.349062	1.3945922999999998	8.78051	1.0774459900000002	0	1.13505	3.1859132199999998	1.0684	4.52311	3.4385824400000002	0.843705	5.23171	7.66194	8.721271340000001	1.66848	0.542069	0.637196	9.172549499999999	11.334	7.769985699999999	3.82773	4.55553	3.37178	1.9372299699999997	1.8228419800000002	1.69331	2.4840080999999996	2.24423	1.04142	7.44173
Mza	9.83789	9.51187	12.3983	6.07193	9.39877	6.7904507899999995	11.1316	9.9007	9.56889	6.70951	9.65785	7.95812	7.72897	12.3036	17.9726	19.9561	19.5794	18.293156409999998	9.174	1.42332	2.1691928700000003	0	1.94994	0	7.16057	9.48294	5.34337	7.8714387299999995	11.3736	10.2208	7.04997	8.22496	13.5089	27.5523	19.2537	14.9052	2.98581	5.91328	8.47525	8.96807	8.92302	10.0773	5.87321	6.82844	11.6305	9.56501	13.2533	10.491	6.45099
NLR_like	7.27141	1.5016	4.85021	0.614125	8.80477	0.848137	8.93194	5.53514	6.92075	2.75849	13.4531	1.9729	11.7483	8.72237	11.8441	10.1787	4.83394	3.36197	5.97539	2.11834	4.88931	22.345956280000003	5.56902	3.42117	19.613654490000002	24.3024	12.5021	6.747812120000001	10.264	8.68017	2.055	6.71931	15.478626760000001	10.283217800000001	5.2676	53.0119	4.9855135299999995	9.17157	8.28743	11.2802	7.2403360800000005	8.32741	15.919	23.3805	15.3698	15.7587	18.8635	11.4219	8.6589
Nantosuelta	0.392664	1.54512	0	0	0	1.77586	0.9113928299999999	0	0	0.819475	0	1.25606	1.84299	1.73726	4.64912	4.37166	0.601706	3.9036280000000003	4.45275	1.1714735699999999	0	0.624581	0	0	3.37714	2.78032	0	0	0.268675	1.07021	0	0	1.9266	0	1.22504	4.3874	3.47311	3.18396	1.4817033099999999	3.49334	2.22677	4.05471	0.506539	1.53164	2.11804	0	1.36325	0.807277	1.3781971199999998
Nemetona	0	0	0	0	0	0	0	0	0	0	0	0	0	0	0	0	0	0	0	0	0	0	0	0	1.8313	1.3321	1.18196	0	0	0	0	0	0	0	0	0	0	0.886874	0	0	0	0	2.1195961800000003	0.803293	0.673651	0	0	0	0
Ogmios	0.415055	3.2826	0	2.09207	0	0.578492	0.7338263199999999	2.41441	3.96158	0.9657955199999999	0	0	0	1.05686	0.368542	0.681096	0	0.60748	0	0	0	0	0	0	4.16881	13.8144	7.7323850599999995	3.75491	5.3392116000000005	4.99921	0	1.9345	4.15572	4.23342	3.0881496200000003	2.22595	0	1.44816	1.75175	3.8614	3.47932	5.53577	6.116213070000001	6.12596	7.43487	7.61063	10.1598	8.1068	0.233592
Old	1.0411	5.21204	1.59253	6.93504	2.97807	5.60771	4.62792	5.48486	5.91901	2.52578	4.18596	2.47406	13.419345900000001	13.4765	16.351	9.8098	7.51327	8.0612	6.029907270000001	3.53398	12.8994	99.2068	8.5744	28.4725	12.7706	13.019422129999999	6.90832	11.8504	10.1768	11.8107	7.92895	14.7909	17.1465	6.02417	3.3038939999999997	3.3665	4.30678	4.92629	7.45322	20.5258	15.4538	15.2344	5.6002	8.89705	8.35533	11.2363	13.5244	9.5296	14.8137
Olokun	0.671067	0	0	0	0.654054	0	0.269643	0	0	0	0	0	0.570172	0.317	0.354045	0.507086	0	0	0.634913	1.76181	1.8842	3.29796	0.478817	1.8366	0	0.682784	0	0	0	0	0.500166	0	0	0	0	0	1.01091	1.50837	1.51808	0.8888677700000001	0	0.7694413899999999	0	0	0	0	0.186412	0	0.192346
PARIS type I	20.1001	23.1507	13.9161	17.335	19.5557	20.661	20.0907	24.5628	21.4412	22.2851	13.9897	17.5909	21.565	32.0208	21.905	19.8578	20.4186	20.4018	93.55690104000001	23.3794	37.3487	38.5249	38.8236	23.013783699999998	31.8568	33.9851	31.9517	24.6735	24.690733469999998	22.659	24.9366	41.5393	25.729660199999998	29.5078	25.8519	18.0459	19.0306	22.0615	24.7036	31.6194	33.9067	35.7248	41.7067	32.4945	40.8396	26.980692780000002	34.6974	28.223	30.1634
PARIS type II	87.3154	64.3673	35.5258	62.9714	56.8105	79.5581	105.299	86.762	82.108	108.065	51.5581	100.83	107.074	94.3949	68.6576	93.073	86.615	87.389	45.0874	79.8331	81.3692	17.3632	152.349	156.586	38.8533	59.6947	60.0175	73.3463	81.81561110999999	81.607	109.222	66.5717	72.2791	126.055	163.524	129.97	78.9744	70.3447	92.4363	108.497	86.6472	98.6189	34.4746	36.1036	49.9922	56.8439	84.2968	82.5845	75.8419
PD-Lambda-1	6.571680130000001	6.8912128599999996	4.7178	9.04864	5.27795	11.8402	7.67211	3.80966	10.5128	5.22432	3.42446	6.65087	21.0348	28.0249	24.3377	18.880773689999998	13.1638	15.9664	4.61605	1.92221	4.82677	3.39687	9.78386	4.20239	26.531	32.6722	21.0543	18.8638	16.1084	13.4452	11.459	15.3816	16.7913	10.6466	10.116	4.81543	24.3388	20.0101	26.2153	21.8736	20.4385	32.9346	19.2066	25.8545	24.1944	25.056	29.32	18.244094229999998	28.0445
PD-Lambda-2	6.4528	3.82842	4.54857	3.24933	4.98809	0.632747	4.48811	2.30613	2.82784	3.11394	5.62927	1.45215	2.57021	6.63763	4.06422	6.62863	6.93033	4.31838	6.88492	5.7605039399999995	5.84178	0	4.30169	1.7110227900000001	9.4315	13.8974	7.7255	4.1107	5.57236	3.4400460600000002	5.73151	3.5233141999999997	8.2781	5.34733	4.60554	3.5765950999999996	6.74965	7.668360509999999	11.234193920000001	5.73307	3.87172	7.86801	5.89378	8.47159	12.7229	5.7705432000000005	5.09719	2.96631	29.9796
PD-Lambda-3	0	0	0	0	0	0	0	0	0	0	0	0	0	0	0	0	0	0	0	0	0	0	0	0	0	0	0	0	0	0	0	0	0	0	0	0	0	0	0	0	0	0	0	0	0	0	0	0	0
PD-Lambda-5	17.1983	6.6878	7.81615	5.12658	8.95453	5.14557	12.1092	4.73651	5.33991	7.35369	6.86909	7.34394	18.3014	13.398929460000002	7.43807	12.494948749999999	10.880412139999999	10.7614	9.39038	10.1051	13.6844	1.46961	11.2182	5.624196100000001	8.52008	6.27572	6.72579	3.0771835100000002	3.17818	3.3546	11.871312849999999	10.9123	7.59427	12.8045	18.3981	14.0628	12.168	12.5894	17.528	11.4952	10.7384	11.9534	7.07101	5.37503	6.85643	2.72882	5.13092	2.17691	11.9063
PD-Lambda-6	0	0	0	0	0	0	0	0	0	0	0	0	0	0	0	0	0	0	0	0	0	0	0	0	0	0.356705	0	2.48624	1.10462	3.3647	0	0	0	0	0	0	0	0	0	0	0	0.526891	0	0	0	0	0.631155	1.26903	0
PD-T4-1	0	0	0	0	0	1.05073	0.465325	0.793808	0	0	0.49363	1.0968	0	0.994939	1.63168	1.0248402699999999	0.353805	1.46527	0	0	0	0	0.930665	0	2.2493949000000004	1.1470957400000001	0	0.251643	0.556386	1.72374	0	0	0	1.04328	0	0	0	0	0	0.715823	0	0.365682	0	0.757055	0.605695	0	0.937692	0.742999	1.09777
PD-T4-10	0.580438	0	0.654833	0.679297	0.70804	0.741514	1.0028	1.2632499400000001	0	0	1.62569	0.588177	1.86764	1.39556	1.46	1.59523	0.965735	0	1.68279	0.794898	1.30647	5.4366	5.579286440000001	6.41685	0.828073	0	0	0	0.603148	0.720752	1.71119	0.658366	0	0.612937	1.42364	0.760344	0	0	0	1.27081	0	0.68582	0	0	0.256207	0	0.418475	0	0.6859111600000001
PD-T4-2	0	0	0	0	0	0	0	0	0	0	0	0	0	0.245561	0	0.874316	0	0	0	0	1.20434	7.84649	6.55814	2.94794	2.12926	1.41349	2.24697	0.733703	0.615477	0.729648	0	0	0.619313	0	0	0	0	0	0	0.349875	0	0	5.25537	3.50728	6.25598	2.60367	2.02839	1.08977	0
PD-T4-3	11.7762	4.89679	7.4695	4.55025	9.582715539999999	3.9834330799999997	11.682889020000001	9.05276	8.026980870000001	10.550442539999999	9.77962	6.014203070000001	9.98728	13.9826	15.5097	16.7173	17.708140619999998	10.1656	1.15863	1.52107	5.65123	1.31888	12.915662699999999	20.9266	14.781015029999999	10.3553	6.24529	11.1858	7.05227	9.07515	11.3888	8.03066	6.40241	16.2642	16.4998	9.3069	2.73345	1.059	4.69505	10.5494	9.99237	11.2253	5.9366530399999995	3.39651	3.11385	6.41517	9.66227	6.10983	7.636886700000001
PD-T4-4	12.3924	16.013912480000002	12.1658	5.8986295900000005	12.566854320000001	14.8142	11.0298	12.6201	10.0306	9.18393	9.78142	5.30627	4.42861	15.3311	6.90841	8.120935150000001	6.9459692099999994	6.86244	0.7894392800000001	0.864534	8.49519	1.41429	1.14777	0	28.9971	18.7638	23.6354	12.1479	9.8086	4.50995	9.72609	19.2924	12.2901	16.549721159999997	10.3894	6.48602	10.7927	14.394630730000001	19.692159070000002	18.0119	16.8414	23.4047	26.7776	14.9438	21.3607	7.33249	13.201	7.58004	10.2558
PD-T4-5	1.06893	7.8185616300000005	0.937087	2.0748726800000004	3.00203	5.74783	1.1493	9.28898	3.2244762099999997	2.35276	0.652014	1.53116	11.305	17.0133	9.12482	14.1476	8.30334	7.8757	5.45252	7.0997455700000005	2.85857	4.0626584999999995	2.8248210700000005	92.6123	14.9834	23.6311	15.5637	14.1931	10.1536	10.6602	56.1602	26.0317	11.5932	7.97364	7.03533	7.17368	7.40807	21.447286990000002	20.6844	13.0314	14.0029	16.4558	17.0773	16.1658	17.592	19.8073	21.518949329999998	15.6019	38.8493
PD-T4-6	497.739	427.476	372.285	301.299	441.70637075999997	359.598	484.683	296.367	253.101	415.732	425.983	381.672	248.105	327.76	195.932	294.24591786999997	230.064	247.11005059000001	190.118	256.887	256.033	130.891	355.355	160.378	278.646	277.832	277.054	239.474	230.847	189.708	211.423	199.184	177.969	326.974	311.894	331.427	274.124	274.073	331.593	386.413	317.847	453.984	212.561	160.651	215.148	182.182	246.056	185.683	352.085
PD-T4-7	4.18849	9.32489	5.94197	4.19377	9.94875	8.471491930000001	5.32254	9.83703	13.6485	6.86069	1.98014	5.43501	9.798494439999999	13.9122	6.937157340000001	30.8065	29.2622	21.6311	7.4696368799999995	4.353965669999999	5.76079	2.21745	7.66614	6.060758460000001	10.0033	15.3642	9.81941	15.8997	18.4547	22.2644	4.95496	9.79097	7.19605	29.9699	27.7537	22.131660080000003	6.25092	8.27951	10.9112	14.3137	17.8874	11.2662	11.750756370000001	20.183	20.158693290000002	22.1704	29.7209	29.4101	6.69956
PD-T4-8	8.74518	2.29474	5.24597	2.68984	4.22292	2.92072	6.63597	1.81491	2.88847	2.78106	7.36515	0.579491	2.7605	8.02064	7.878916299999999	4.08598	1.46119	3.46744	1.58857	13.7424	4.15778	0	2.61247	0	7.697498749999999	7.20912	4.6727	3.57401	1.16883	3.35931	0	1.18463	1.2036	0.992974	3.46657	0	1.49449	6.35706	5.79284	6.9091283599999995	4.38206	7.87531	4.58086	3.64385	3.7589465300000002	2.0972863200000003	2.22124	1.97011	1.2264734800000001
PD-T4-9	2.62781	4.96305	4.53797	5.588814729999999	4.6876641800000005	15.0841	11.8686	17.1957	17.043700989999998	10.8221	10.645345110000001	12.3765	4.34266	10.3224	9.99375	11.0893	5.50631	4.2087	7.14544	9.54517	15.1586	31.8567	13.5042	25.0209	23.3853	21.697014890000002	12.4967	11.8184	11.7613	18.565568040000002	9.52992	8.30963	16.2087	12.4369	7.52646	53.3705	12.3806	15.4247	15.4848	17.4418	16.1012	16.3913	16.7389	26.4849	24.7966	17.3644	25.7401	20.4637	33.9079
PD-T7-1	0.934016	1.58962	0	0.407578	0.675821	0.729358	0.9144884200000001	0	0	1.21069	1.46098	0	0	1.63219	2.71713	3.2787661000000003	2.8095822999999998	2.48443	3.22228	5.66297	1.03452	0	0	3.03756	0.465868	0.629257	0	3.3123	0.837843	1.05564	0	0	1.1991	1.5113411700000001	1.2910430800000001	3.05101	0	0	0.8039380899999999	1.71863	1.04518	1.1205695599999999	0.620873	0	0	2.53823	1.53308	0.629358	0.89949
PD-T7-3	4.58743	7.63664	4.97704	4.70765	4.54711	6.72914	7.92869	11.1678	8.13134	10.6704	7.73638	7.24684	10.3331	12.6956	10.3685	9.44375	3.06563	1.51581	6.47811	6.2663	12.6539	60.7811	14.4171	26.9061	4.25217	8.4168	3.68284	6.780428479999999	7.97589	3.51886	9.543205369999999	8.14088	9.57051	3.33519	2.41114	2.4937244400000003	3.78051	9.86239	7.966700879999999	19.921269629999998	14.1266	13.9139	1.65754	6.03466	6.8072	3.27801	8.00966	5.39739	12.321
PD-T7-4	3.5360995500000003	3.66928	4.54009	2.3686	2.8204	5.02682	4.40243	2.84573	2.8535709799999998	2.53931	5.25793	1.60731	2.9241047499999997	3.5522757499999997	4.13666	2.5035803000000003	3.27595	3.08026	0	1.54349	0	0	3.58052	2.27035	16.4093	18.9095	18.0569	5.69932	5.95092	5.97237	8.04924	6.26408	10.6827	7.03444	4.98611	3.2144	7.19607	6.62985	8.91891	5.208	3.07227	5.46387	16.9275	20.4127	26.9528	9.8573	13.632932610000001	10.537	39.0092
PD-T7-5	2.8331	12.4151	2.05545	9.05595	4.56951	7.382582950000001	4.6727826100000005	9.53213	14.855880580000001	4.79754	1.0668	3.41755	8.6829	10.8329	29.3246	9.69593	9.65709	11.697	10.747252699999999	5.67798	2.1946277899999997	4.36673	2.57662	5.23679	27.0651	29.6969	22.7096	25.4186	25.228	23.0295	3.79868	11.1912	21.6366	14.625	11.4558	8.2872	4.49687	6.18997	12.7502	11.8716	12.8735	16.8087	58.264215549999996	48.889	57.3003	30.9749	40.205610289999996	30.0771	3.0234805000000002
PbeABCD	2.25654	2.32851	1.61809	0.902626	1.68557	2.02874	3.13555	3.33061	3.42749	3.3751594000000003	1.84221	2.47824	6.45348	2.56056	2.53892	3.19233	5.3433475999999995	3.1573371000000003	0.348455	5.32493	2.8814621000000002	0	8.75671	32.794	2.94971	2.70091	2.74329	2.39448	2.7387401000000002	2.5012	5.07141	1.94019	0.934596	4.22215	7.676	3.31635	4.72345	3.9697080000000002	4.46868	4.5867222199999995	3.52197	4.28469	1.6843022699999999	0.709487	1.96602	1.80941	2.15261	1.89547	2.67076
PfiAT	9.92723	11.8388	13.385698210000001	10.9991	14.6321	9.778034790000001	12.926530179999999	15.5919	16.0644	11.2577	18.4705	10.0028	2.7812159100000002	9.17874	10.5932	3.38818	1.76085	0.963435	7.181576209999999	12.9411	61.5206	1.24786	3.4207512700000002	0.8103	12.6312	15.158	7.19901	21.4314	18.0271	13.3283	8.96334	7.86992	9.34108	10.7356	6.57924	5.48658	20.1919	21.4891	12.524330769999999	7.754861930000001	2.13394	8.0546	12.1704	17.0464	10.241	26.0273	25.435993110000002	22.8592	28.4089
Phrann gp29-gp30	2.5552	4.56486	1.8928667999999997	4.26421	2.28332	5.95035	2.9643562799999996	0.750464	0.587916	2.5715305600000002	2.53034	3.30106	0	0	0	0	0	0	0	0	0.979322	0	0	0	0	0	0	0	0	0	0	0	0	0	0	0	0	0	0	0	0	0	0	0	0	0	0.508161	0	0
Ppl	5.9071061700000005	7.1218515700000005	4.919	7.58217	5.94588	6.58409	6.74763	5.16597	16.8787	4.382371770000001	3.77757	2.82805	14.4087	30.8423	37.1515	22.9595	13.993065620000001	14.8103	6.957173470000001	2.44012	1.73907	11.2663	6.02219	2.83587	7.9032	18.3798	7.38885	33.0224	27.8159	21.9336	57.2748	57.714	36.6914	22.427	11.9478	11.3938	3.83945	8.0244	4.75117	16.9172	7.77097	15.2141	15.5447	17.3747	19.4347	22.1554	28.6262	30.2152	23.8398
Prometheus	29.8438	26.4244	19.3395	20.8983	20.8538	23.8411	30.9634	22.5568	24.7502	30.5445	22.9214	28.7544	22.9991	27.6736	33.4014	32.5384	20.5851	21.1327	12.4744	21.6035	34.5111	13.352458720000001	43.8119	36.2272	43.3897	41.785	36.6707	27.8157	23.599002770000002	15.265693670000001	15.6283	14.722368509999999	30.246327870000002	19.8517	18.562208769999998	17.4585	25.8184	43.803277349999995	44.786	25.985	20.6444	26.015	47.8871	40.6749	45.2875	22.3079	28.6469	19.2579	35.9058
PrrC	30.5612	44.3585	26.8799	76.70496044000001	37.2686	58.1139	43.0192	43.9367	44.3523	36.8929	25.1933	27.6747	73.2669	86.6164	153.848	98.3259	77.3973	89.5483	16.2102	22.5926	29.032064130000002	43.4701	41.5957	33.7567	56.494	92.5087	49.2836	82.8503	65.1017	54.0129	78.184	72.7671	129.507	80.3223	43.4304	64.0909	29.9931	40.3519	52.1375	97.7601	77.2653	111.11013894999999	60.1621	74.5547	87.5159	81.9606	110.95332020000001	83.8513	65.2855
Pseudo-CoCoNut	0	0.514091	0	0	0	0	2.25478	0	0.688071	1.12608	0	0.733157	1.57973	1.82107	2.52926	2.47746	2.74742	3.1884	0	0	0.386382	0	3.41546	10.574663619999999	0.758176	0.830869	1.06073	1.10904	1.56046	2.41134	1.9849470999999999	0	1.18065	2.8114088600000002	3.1514162299999997	3.2015827000000003	3.80691	2.81729	3.83563	3.5436	3.2132336500000003	5.3242	0	0	0.7391840199999999	0	1.85333	0.668718	1.26635
PsyrTA	17.7826	17.78	12.6944	13.541292160000001	14.85	12.8023	20.3719	12.8364	15.0745	13.721	17.5429	10.8183	15.4162	20.950178649999998	20.0031	18.5102	12.913393070000001	17.7106	6.89409	7.002392390000001	7.01094	6.81247	7.13597	4.81562	7.58661	11.3027	5.3426825000000004	18.8484	17.7978	14.7403	21.2283	12.613663970000001	17.6645	12.0603	7.48227	3.5122576000000003	5.37119	8.68239	9.71897	14.636061100000001	9.30228	14.1317	6.52215	4.14103	10.1674	10.6232	17.6009	8.25383	19.7232
Pycsar	11.3326	8.54073	10.8601	6.489567429999999	10.1897	7.195562600000001	12.6303	10.5825	12.161440299999999	11.2648	14.3171	4.297244790000001	3.86347	7.69393	5.59367	8.95698	5.98653	4.04077	1.41535	2.00808	1.9017	1.3636	2.56851	0	16.318	19.2168	7.0995	15.2214	16.6878	15.7421	12.0045	8.53819	14.8232	10.1919	9.3376	9.29542	4.39519	7.2075	6.40834	9.64922	5.66308	12.2707	8.35527	9.76854	20.555659990000002	15.911901140000001	23.9554	14.4261	14.582
QatABCD	0	1.25246	0	0.891326	0	0.836957	0.493434	0	0.822792	0.436084	0	0	4.2816494899999995	3.92386	12.8183	2.47597	1.82218	3.97304	0.789155	0.935557	0.852901	2.91762	1.91062	3.29975	0.653314	0.9242253599999999	0	2.94479	2.18915	1.63338	3.35417	3.9206652999999996	7.90516	8.53249	3.89987	46.4939	1.38817	2.99806	2.26533	4.02883	4.56377	5.82041	0.819921	0.916661	0.878541	3.3674827499999997	3.33576	2.66435	1.2920887300000001
RADAR	1.14386	5.97085	2.88075	4.05587	2.75441	4.02677	4.16253	4.856306399999999	5.36326	2.88123	1.56152	2.0602503299999997	3.18845	4.0137778399999995	11.8971	3.86428	2.79862	3.27522	0.469729	0.503508	0.715492	1.22242	0.931735	1.61813	1.32727	2.20928	1.57015	5.56568	5.90607	4.54323	4.0501	5.42272	12.6837	6.43705	4.47545	3.71514	2.06025	3.88681	4.36783	4.3131400399999995	4.83082	6.687344749999999	1.43128	2.36904	2.69718	5.62348	7.94811	6.47734	1.20178
RL	0.491101	3.10116	0	0.561971	0	0.831955	0.647103	0.908715	0	1.54166	0	0.840261	0	0.319632	0	4.05063	0.602911	0.645864	2.21598	0.980625	0.732841	0	0.538651	0	0.42103	0.724474	0	0	0	0	0	0	0.506599	0	0.489252	0	2.5794	1.4325735700000002	0.962278	1.46403	1.50842	1.4990503199999998	0.571856	0	0.443409	0	0	0	0.669978
RM type I	525.051	530.855	493.841	429.955	564.754	499.586	624.526	485.201	612.876	477.56	600.213	420.413	658.714	732.062	1151.67	643.852	496.361	624.066	264.867	257.616	404.798	966.0557976599999	480.802	638.645	578.229	739.324	471.274	758.837	726.186	594.622	557.543	686.326	1043.62	661.75	544.657	721.9021093599999	447.34487280999997	585.198	602.547	876.566	797.989	890.688	571.262	655.74	714.855	809.317	935.185	776.707	619.479
RM type II	1248.7	1334.53	1144.58	1089.77	1357.84	1196.63	1391.9573674600001	1356.51	1274.11	1169.71	1334.09	1018.09	834.913	1206.3	858.381	1031.24	797.746	828.249	403.134	447.238	631.7804443800001	1376.77	748.264	833.469	1655.12	1495.29	1150.79	1192.26	1300.39	1282.66	791.719	1066.66	799.729	1315.75	1077.44	896.079	921.044	1260.33	1435.15	1380.14	1344.91	1514.62	1496.1	1305.8	1702.89	1118.29	1640.24	1299.42	1548.55
RM type II-2	160.528	229.502	177.302	201.778	207.91	222.402	200.184	229.902	216.226	173.086	191.63338038999999	167.088	68.8224	149.089	94.7134	115.058	81.3843	92.337	26.321910850000002	50.4235	72.3463	53.5813	74.9734	39.1683	225.213	182.107	149.25	209.763	242.42429147000001	266.632	88.0947	129.082	90.0754	225.054	167.541	138.885	95.377	145.763	192.732	163.227	174.521	200.864	216.353	182.437	240.042	202.797	313.986	270.642	152.23
RM type III	191.433	185.276	168.75	115.65	195.827	169.281	203.024	166.509	166.062	157.026	200.273	142.718	161.57540342000001	228.72	159.802	160.526	127.34317619000001	123.483	82.7556	77.4734	91.489	250.702	133.817	154.097	197.39	208.321	165.607	151.269	149.324	136.17	117.458	139.079	126.997	163.555	126.493	109.348	98.7962	123.484	148.518	180.896	170.432	214.593	236.298	206.415	245.934	155.413	206.511	170.919	162.918
RM type IV	342.72	516.927	316.386	454.83	431.691	493.45	455.028	515.662	522.041	390.573	364.794	348.015	327.097	431.206	509.927	376.654	319.838	355.837	138.954	136.59	163.634	420.78614412999997	273.033	199.546	691.378	766.2834990599999	563.394	704.227	736.068	710.918	345.189	485.504	548.811	558.839	471.538	410.854	311.45	428.773	543.943	530.2177206599999	482.451	573.686	684.184	742.895	840.272	698.547	956.281	773.981	433.508
RM type IV-1	28.9302	22.6369	17.5464	15.289891990000001	16.0493	16.3161	30.542875340000002	25.624	28.984	27.9512	17.5815	24.6409	34.5129	25.4426	21.1219	29.659	25.471	24.6614	21.675135939999997	26.6903	54.2647	3.40534	39.8933	82.9774	27.8931	26.2893	21.5613	23.5875	21.826	18.797721160000002	28.158	11.0404	16.3842	26.0101	39.5891	19.612	21.205	22.1253	29.9091	23.5424	19.4627	21.6316	17.031739390000002	9.1302	16.9878	10.2733	17.3322	5.62851	31.8762
Retron type I	2.34297	4.58935	2.02877	6.96358	0.500028	4.62239	4.96627	5.31795	9.95503	5.77617	2.13834	7.42806	8.186335530000001	10.0032	11.4106	8.70813	4.68397	5.905796759999999	19.957821590000002	3.55024	4.18139	43.1883	20.546951229999998	23.2847	14.5695	12.3626	11.9834	18.855122950000002	14.2842	9.46317	3.5455957299999996	2.35141	9.01343	4.172865359999999	5.28986	6.15748	7.90425	7.60252	10.4376	16.2015	10.2474	14.9554	17.0717	23.214438519999998	14.0055	15.0272	16.8081	4.51694	8.98562
Retron type II	0.360823	6.09845	1.05139	1.76764	1.30669	2.51198	0.926154	7.528380380000001	5.93292	3.50385	0.497873	3.33773	5.43519	7.1411228399999995	15.6752	3.84954	2.8409721400000003	3.12654	2.81835	2.72486	0.83754	3.97856	1.88099	2.49732	12.6697	16.994395580000003	11.6353	10.7493	8.8007	6.57677	6.753489500000001	6.79232	23.342490259999998	3.24224	2.24962	1.70036	3.72653	9.776679990000002	8.68079	13.210554909999999	17.4732	17.1267	13.7928	18.563104000000003	19.7396	15.0031	14.8354	14.2706	4.98353
Retron type III	4.56009	4.53652	2.84019	4.48876	3.16624	3.71064	6.141952610000001	3.4933476700000003	2.18071	3.89873	5.06607	3.5248392699999997	8.40288	9.17147	9.96404	8.35969	6.81411	7.603714399999999	1.30657	2.29401	2.6287786300000002	8.43705	12.2244	3.72618	3.6698464599999996	2.98398	1.5792711700000002	0	0.811122	0.615415	5.21754	3.064	3.6808233599999998	6.6626175199999995	7.98548	3.56414	0.574312	0.461466	2.26069	8.34581	5.51256	9.03304	2.67001	2.64167	3.2798313500000003	2.0121	4.28723	4.54626	3.56616
Retron type IV	0	0	0	0	0	0	0	0	1.53165	0	0	0	1.87389	1.64277	8.10888	4.32373	4.19391	7.24984	0	0	0	0	0	0	0	0.8774201300000001	0.874132	7.25227	5.11239	0	1.52461	0	9.48475	0	0	0	0	0	0.951137	0.9285056599999999	0.868294	1.88967	0	0	0.580285	1.85792	2.17431	2.03243	0.683286
Retron type IX	6.70845	7.16312	4.19189	2.35929	4.53359	2.29603	6.4380519000000005	8.45403	6.46462	7.0511418400000005	4.46796	5.1705299799999995	15.711433360000001	12.168321630000001	14.7336	14.8872	12.2367	10.3068	10.5983	9.39538	15.909290599999999	154.696	19.9763	36.568142699999996	4.53741	5.8472712300000005	5.11378	5.74179	5.289	2.49776	4.27218	6.82666	4.44431	8.6203	4.14383	6.5087	7.9156	9.9943	6.43154	27.8521	21.344893329999998	19.2133	5.13467	1.67472	2.51762	3.75669	5.36671	2.25692	7.51006
Retron type V	0.864294	0	2.4367	0	5.17179	0	6.31023	3.08089	5.26478	2.56339	3.58022	1.29417	3.15377	4.41759	2.3204	10.1649	10.2351	6.2244	0	1.60529	1.73169	0	2.51113	1.9583	0	0	0	0	0.420267	0	2.61327	2.5816287499999997	0	4.97462	3.46678	5.5955	0.399911	0	0.533279	1.33985	0.73838	1.95229	0	0.869251	0.446305	0.948197	1.45983	0.883931	0.965298
Retron type VI	6.5880262599999995	2.30717	8.64808	1.81759	9.88815	2.27171	8.60704	8.25202	6.5196	8.48113	11.7142	7.13805	2.17768	6.66339	1.4020628899999998	3.10362	8.554927679999999	4.08777	8.68925	3.72742	13.3513	2.77177	4.05725	20.0217	3.67392	7.33346	2.33524	7.95945	5.65569	0.546933	0.585256	3.3209968400000003	5.39151	6.30693	1.95746	4.58889	2.48098	8.08383	7.4249	5.7181	4.25112	6.83601	3.02295	3.8436098999999997	5.683127600000001	7.2212668099999995	6.7772196099999995	2.14468	29.0213
Retron type XI	0.777729	0	0	0	0	0	0.364585	0	0.493487	0	1.06359	0	2.38295	0.992535	2.5474016400000004	1.67776	0.728252	0.948735	0	0	0	0	0	0	1.36553	1.67754	0.52292	1.95944	0.682933	0.41851	0	0	1.89357	0	0	0.795673	0.720025	0	1.60891	0.53698	0	1.1649898699999999	1.07407	0.681031	0.390517	1.74911	1.57837	1.9386	0.725555
Retron type XII	1.50269	2.2566100000000002	2.21247	3.2755323699999996	1.9088499799999998	3.64744	2.54911	0	2.90003	0.566287	1.31655	0	2.44198	2.60407	3.5818987799999995	4.29008	2.47407	3.4629	0	0.752735	1.31573	0	3.6715797500000003	0	1.69727	2.5229590699999997	0	2.83859	3.92027	3.72924	0	0.704233	0	8.41539	6.25412	4.34403	0.866606	0.843299	1.55775	1.08417	1.84166	1.41441	1.68459	0	0.586897	2.35409	3.61858	2.37583	3.66905
Retron type XIII	2.97825	0	0.917725	0	2.85174	0	3.21897	0	2.86157	0	7.257403399999999	0	0	0	0	0	0	0	0	0	0	0	0	0	11.975150320000001	11.885	3.80492	6.1175	5.11073	1.50122	0	0	0	6.3185	3.79486	8.60272	4.03657	3.32945	2.69907	4.75616	7.76357	5.98877	1.43375	0.701914	0.782557	4.01843	4.85303	2.82211	12.7993
RloC	48.0044	42.7053	50.1112	46.7897	41.5208	41.9309	47.4405	41.0507	34.8113	44.5989	49.4119	34.7953	34.7299	62.4737	73.1298	59.8004	43.902875789999996	57.869016179999996	146.482	29.8614	33.0793	48.9747	26.8121	17.0435	78.6376	95.0478	39.3159	46.8581	36.471	29.1521	27.8041	38.6264	72.3695	54.043059310000004	35.6322	115.122	39.6882	48.9375	62.9545	58.6899	42.2346	58.9219	59.3105	65.2841	90.778	31.8937	60.832	37.1152	71.0341
RnlAB	4.72103	20.512	1.43894	10.6275	3.10121	16.0081	5.02636	7.03631	9.90027	8.12212	1.3583	7.4983	6.39063	8.79853	3.27699	6.7374597199999995	4.03361	6.7984	8.78033	5.964494640000001	6.413810079999999	1.8572837999999998	9.56434	0	8.12279	10.1409	7.13725	10.0048	12.0822	15.9237	5.13337	10.9547	5.10254	16.9688	15.6313	11.094523129999999	8.00945	6.91708	11.5182	11.6009	11.4817	14.4415	5.67736	5.8821214699999995	8.33068	8.48522	16.9967	13.5034	1.80839
RosmerTA	9.21494	12.6468	7.73071	3.4851	9.75438	10.7154	17.8113	12.189	15.3219	20.6456	16.191	9.9666	19.3724	26.2301	20.2124	24.633	21.462291139999998	12.9263	17.5092	12.5387	21.7927	101.164	29.0265	35.0419	18.725	33.2078	17.5026	15.206625859999999	15.293095639999999	6.03633	21.2109	18.8032	27.8524	13.5718	14.2409	15.2756	9.90035	18.616885410000002	18.253259449999998	28.395323480000002	21.9031	23.061135489999998	8.32152	9.20798	11.4593	10.4429	17.2791	7.04186	30.053
SDIC1	0	0	0	0	0	0	0	0	0	0	0	0	0.729626	0.325122	0	0.519605	1.46883	1.02329	0.98248	0.447729	2.80112	0	1.93488	142.548	0	0	0	0	0	0	0	0	0	0	0	0	0	0	0	0.903304	0.599667	1.26238	0	0	0	1.53129	1.29375	1.07016	0
SDIC3	0	0	0	0	0	0	0	0	0	0	0	0	0.643159	1.15736	0.723614	2.20623	4.96511	2.7429377400000003	1.76804	0.432703	3.45057	4.16451	3.67147	113.89692670000001	0	0	0	0.68229	0	0	0	0	0	1.08762	1.6741338300000002	1.49289	0	0	0	2.40781	0	2.60432	0	0	0	1.43351	2.6687109700000002	2.3479687499999997	0
SDIC4	0	0	0	0	0	0	0	0	0	0	0	0	0.729626	0.325122	0	0.519605	1.46883	1.02329	0.98248	0.447729	2.80112	0	1.93488	142.548	0	0	0	0	0	0	0	0	0	0	0	0	0	0	0	0.903304	0.599667	1.26238	0	0	0	1.53129	1.29375	1.07016	0
SEFIR	32.0278	27.6302	29.6422	53.3786	41.3622	38.7055	47.0832	33.0774	39.2034	41.9164	39.891	34.1964	33.0842	46.0604	26.325643720000002	40.1851	39.2367	32.6568	62.1497	26.4645	27.333	35.960611809999996	36.441533899999996	26.2194	48.707740709999996	58.7818	48.9242	39.6096	40.2607	32.5932	69.6433	43.8295	40.8767	39.9358	36.573452270000004	34.8657	30.7594	26.7245	46.4158	34.8183	27.343184309999998	31.5431	60.0885	68.0422	74.0812	44.8016	66.747	49.7105	47.4443
Septu	126.212	150.896	134.654	185.478	154.127	163.838	192.677	177.285	187.252	146.148	142.974	106.807	132.138	202.817	182.966	214.99	186.591	169.662	150.752	74.2102	84.0102	53.283	167.862	74.4694	367.676	387.439	304.992	235.15	233.599	243.526	284.507	245.569	230.132	221.835	219.515	191.89	98.2674	148.07	191.879	164.716	153.629	181.335	541.792	551.205	607.409	345.264	424.47	301.377	299.582
Shango	4.76964	5.8242746400000005	2.96153	8.89725	4.10937	14.665911269999999	11.9161	6.71036	7.43242	6.3657021799999995	10.060331439999999	7.47178	12.0249	14.7872	26.429449780000002	10.0702	4.07307	6.36087	31.6138	8.91369	5.80031	9.54579	13.0224	10.7818	14.7638	18.9388	11.305661650000001	9.90433	8.829062669999999	9.82539	10.0399	12.086808600000001	35.911257670000005	3.69452	3.66473	4.07572	8.30818	11.5448	11.5073	11.7127	11.5352	15.8703	14.3922	10.6367	11.3419	13.129923510000001	14.0256	11.526	5.16262
Shedu	13.8781	17.3348	23.6741	11.3963	16.2106	13.935	23.0426	16.8101	21.5027	19.7343	13.2079	16.8082	22.0509	23.6271	32.592106120000004	24.8585	16.4017	17.5413	21.7958	14.7305	17.0499	51.7855	24.8828	29.2869	21.5113	21.3	18.1859	24.5066	24.2845	15.3951	14.8046	10.9352	20.518	24.1927	23.7304	30.4736	27.8871	27.2995	28.5763	31.2515	22.9478	31.9916	16.6264	10.6655	14.731	19.995	23.4331	14.008908230000001	31.858817600000002
ShosTA	15.432271609999999	20.3215	14.421	15.0531	19.4633	22.4055	23.519	28.9517	25.9371	20.4911	18.2917	17.521	16.0831	25.5254	38.5939	21.979666860000002	18.809351539999998	18.6932	6.738231409999999	4.28167	3.68155	9.944273410000001	13.4529	6.94451	12.8613	19.0327	9.40686	24.2756	29.5264	26.408	14.311	26.1096	45.653	34.8452	30.0257	33.0163	10.8	13.6088	16.2533	25.4697	22.3251	26.533385420000002	8.992209500000001	7.97883	10.5374	23.6355	30.7904	25.059881309999998	12.8111
Sirona	0.966033	8.71689	1.59244	45.763550020000004	0	17.792742450000002	1.39605	0	2.5724	1.32499	1.44121	0	1.6646516599999999	4.44464	1.97562	0.935702	0.650309	0.861813	0.643953	0.754516	1.0132932700000001	0.625935	1.63003	0	49.2241	57.2833	46.9978	10.7928	6.74353	7.95491	3.02655	4.52015	4.7936540700000005	0.8427558900000001	1.15609	0.69176	14.2875	17.406039800000002	21.8102	9.324669140000001	6.52365	7.18913	63.7229	78.63891681999999	76.79747603999999	20.072	19.4211	19.8414	8.31569
SoFic	826.446	902.57	714.2	959.891	867.98	1100.17	999.01	1052.85	992.741	890.702	921.295	891.688	641.627	863.714	892.593	809.916	653.805	730.284	682.254	410.839	500.54	758.025	724.244	591.912	1270.18	1374.53	1099.93	1227.32	1203.6	1296.88	853.815	944.261	1112.01	1094.31	971.411	986.493	808.416	913.741	1066.88	1101.08	1020.82	1153.04	1330.93	1387.24	1488.94	1302.1	1603.62	1426.55	1018.89
SpbK	7.88149	5.413936769999999	3.0907849899999995	4.03708	5.5338	5.0269	14.3681	8.74666	11.7703	10.186112810000001	4.22662	8.67803	14.244692800000001	14.4596	10.133632500000001	15.375135479999999	14.466669920000001	20.1991	6.107723559999999	9.63239	10.3733	9.62305	23.0243	14.0053	17.1701	14.5575	21.4335	7.27086	7.51073	5.281943869999999	13.0135	9.193794839999999	10.2989	9.939666110000001	22.2959	11.8067	20.9154	23.2041	20.4998	17.0123	13.9638	15.385131920000001	8.90588	12.1083	15.528068959999999	7.09182	12.103	6.42305	24.0104
SspABCD	0	0	0	0	0	0	0.435948	0.583937	0.524517	0.508365	0	0	1.02483	1.01294	0.663702	2.57163	0.689902	1.37026	0	0.549627	0.439504	0.51241	1.08234	0	0	0.259892	0	0	0	0	1.36572	0.794767	0.450277	0.68133	1.47762	0.876152	0.759328	0	0	0.597685	0	0	0	0	0	0	0	0	0.67608
SspE	2.25654	2.32851	1.61809	0.902626	1.68557	2.0287398999999997	2.94003	3.33061	3.42749	3.37516	1.84221	2.47824	6.45348	2.09563	1.7661370499999998	2.59185	5.3433475999999995	3.15734	0.348455	5.32493	2.8814621000000002	0	8.75671	32.794	1.59657	2.25921	2.74329	2.39448	2.7387401000000002	2.5012	5.07141	1.9401852400000001	0.934596	3.6538	7.675998300000001	3.31635	4.72345	3.9697080000000002	4.46868	4.3237	3.52197	4.00089	1.6843	0.709487	1.9660158099999998	1.80941	2.1526089199999996	1.89547	2.6707563600000004
SspFGH	0	0	0	0	0	0	0	0	0	0	0	0	0	0	0	0	0	0	0	0	0	0	0	0	0	0	0	0	0	0	0	0	0	0	0	0	0	0	0	0	0	0	0	0	0	0	0	0	0
Stk2	0	0	0.482508	0.667379	0	1.16358	0.156832	0	0	0	0	0	0	0	0	0	0	0	0	0	0	0	0	0	5.817052360000001	8.44756	5.99102	0.643576	0.748922	0	0	0	0	0	0	0	0	0	0	0.293864	0	0.636649	10.3018	11.8315	12.272	1.99844	5.12706	5.1562266999999995	0
Sucellos	0	0.593312	2.62762	0.988146	0.934333	0	0.615208	0	1.71454	0.388711	0	0	1.81898	4.00944	3.09121	5.16555	7.41792	6.47683	1.37469	2.2801934399999997	3.22133	6.27877	0.958796	1.83886	0.624944	0.581935	0	1.65647	1.08977	0.905701	0	2.0351443700000003	2.4613	0	0	0	0	1.19622	1.70375	4.62274	4.86762	4.43196	0	0	1.40183	0	1.37379	0	4.93001
TIR-III	2.29294	1.39482	1.5875018500000002	0	2.3384	0	1.23324	0.792204	0.449305	0.986349	1.8079281099999998	0.53045	0	0.728332	0.976135	0.450994	0	0.397283	0.291752	0.509934	0	0	0.325961	0.684279	0	0.266958	0	0.406839	0.277631	0	0	0	0.529794	0.584952	0	0	0	0	0	0.879811	0.487778	1.08439	0	0	0	0	0.462301	0	0
TIR-IV	0	0.374221	0	0	0	0.633	0	0	0	0.373596	0.346711	0	0	0.203902	0	0	0	0	0	0	0	0	0	0	0.340879	0.859473	0	0.582143	0	0	0	0	0	0	0	0	0	0	0	0.738129	0	1.8136131100000001	0	0.792321	0.737778	0	0.372096	0.939985	0.783325
TIR-NLR	1.57386	4.8917927500000005	1.04946	3.18118	0.752979	8.12015	3.6893042599999997	3.21947	4.96955	9.61958	2.44585	5.23122	6.87092	5.12501	6.12168	3.68909	2.16187	2.84113	0.381693	0	0.517832	0	0.272786	0	4.16532	3.93672	3.57845	10.1017	8.5756	8.932	3.78374	3.49435	9.76705	3.48287	5.20149	2.42305	0	3.01984	3.14273	6.240095480000001	5.26481	6.48228	4.7363	3.37347	4.7757	3.74884	10.0495	7.65004	3.25934
Taranis	1.11192	0	0	0	0	0	0	0	0	0	0	0	0	0.406931	0	0.241479	0	0	4.07963	0.474884	0	0	0.942469	0	0.475375	0	0	0	0	0	0	0	0	0	0	0	0	0	0	1.08711	0	0	0	0	0	0	0	0	0
TerY-P	1.48257	1.70629	1.6166	5.163365199999999	1.19777	6.89524	3.2572	9.21298	3.06002	6.45145	6.7469	4.60967	3.3697676999999997	2.96073	2.23385	2.5677082999999996	3.51763	3.6971948999999995	1.21397	1.02371	2.95467	8.474389630000001	1.7980070700000002	3.9068901300000003	3.51878	4.30926	2.19317	2.64132	3.4700230999999997	1.69167	3.00371	1.63887	1.3075	1.72889	2.7989501299999997	3.3117748999999996	2.3312755000000003	3.0168062200000003	2.07603	1.6504	1.24402	0.889436	1.7228859399999998	2.77219	3.51657	2.15587	3.21224	1.74467	3.11202
TgvAB	35.7163	67.7349	32.2763	42.4088	37.7028	42.5083	44.3309	48.9314	53.007	37.0003	41.1753	28.741247989999998	32.3076	35.5891	35.0611	38.4479	38.5874	36.189	14.2674	20.7166	54.880347750000006	100.096	35.8138	44.6999	46.9134	40.8469	27.5771	50.3316	54.8372	51.0571	25.6148	37.076721739999996	30.1761	50.917	40.2621	39.4488	33.7812	48.144974160000004	51.292728509999996	54.1873	60.474377860000004	60.3128	39.4362	30.7332	46.416066279999995	45.7733	65.9806	52.7824	29.9635
Thoeris + ThsC	0.310039	0.679068	0	0	0	0	0	0	0	0	0	0	0	0	0	0	0	0	0.365244	0.478788	0	0	0	0	0	0.250653	0	0	0	0	0	0	0	0	0	0	0	0	0	0.465991	0	0.37024	0.494625	0	0.442919	0	0	0	0
Thoeris type I	16.151099770000002	11.2787	9.87846	15.8423	11.1242	11.3066	16.5908	9.23304	16.2424	14.0506	18.601728519999998	10.9618	9.43939	17.9236	17.6761	10.9455	8.81388	5.746061490000001	6.60404	12.673	13.8478	19.845638179999998	16.1671	10.705433509999999	14.191785150000001	20.5347	9.78781	21.0442	20.5967	18.8466	19.5405	17.8809	46.2984	19.2043	13.1687	6.47548	4.52415	5.300157759999999	14.5136	21.8541	13.2698	26.6271	13.4171	17.5759	21.254972600000002	32.0852	36.0972	28.531	9.34793
Thoeris type II	19.6817	19.9948	13.7521	16.5356	19.8358	19.4196	17.027746399999998	13.1027	14.6415	16.4189	12.198243360000001	11.5381	3.88656	11.843715809999999	6.0401	11.3715	7.52434	8.50827	8.675546440000002	11.6648	12.5131	31.7818	12.7277	28.3473	22.2929	25.1225	17.3258	18.7043	20.5523	23.1463	9.30933	18.143973600000002	9.50682	23.8817	15.4441	6.593598650000001	8.51515	12.6845	24.5667	24.2469	21.8166	30.8242	17.8808	21.5649	20.3245	21.5027	34.6867	26.7679	11.3
Thoeris type III	2.39145	1.2659158499999998	0.552269	1.53569	1.40992	1.43784	5.25702	0	2.38918	1.41435	4.33872	2.30392	1.28756	4.36537	3.95316	4.1092	0.679968	3.9012129399999997	0.9567266999999999	0.940252	4.41003	7.03931	3.6623	3.38974	1.2031823099999999	3.6733653299999998	1.6703896999999999	1.02636	1.78037	0.375744	6.99545	7.82853	1.91165	1.49352	1.9372	1.4751275700000002	4.12022	4.92404	5.56177	4.898225350000001	3.48996	2.72389	0.411628	1.0847	3.7273970399999996	0	2.49037	0.905531	6.07698
Thoeris type IV	6.6675	5.52327	6.4102657999999995	3.8889	9.51601	9.25438	9.13556	9.16652	14.2503	13.393805330000001	9.52047	11.9154	34.1915	30.2532	41.4508	22.3931	21.9139	18.7067	140.164	35.1977	26.6625	120.165	33.0277	48.189	9.49616	14.2201	6.09805	17.6392	18.014	8.01249	31.2959	28.050107280000002	31.4967	8.1298	5.840236239999999	8.18883	20.1663	21.7825	17.8995	39.5967	34.3689	26.6324	7.0012826100000005	7.82208	8.57601	14.298380419999999	13.407	5.72935	26.6186
Tiamat	21.5005	28.2385	24.8086	31.0544	26.6346	45.5543	41.9947	38.8978	23.5379	31.859	46.364846220000004	44.5895	16.3693	31.407446829999998	27.8814	12.336692410000001	4.08104	9.80316	1.93818	5.53598	2.5259	3.90966	22.6445	66.7313	47.5751	49.3465	33.3145	28.285550830000002	28.8443	37.0611	12.6195	15.992	14.1104	18.8994	14.6631	8.47882	5.40503	13.5697	19.750762220000002	14.2805	4.30756	14.1548	48.9277	48.659632450000004	53.618702240000005	28.669	46.9856	40.1428	11.8601
Tmn	9.56748	19.3762	12.5547	13.3733	15.6272	19.0502	16.1589	12.5917	11.382314880000001	11.577539049999999	20.9077	11.2495	1.60217	7.1211408800000005	5.5794735499999994	4.9976612000000005	4.88599	5.30394	3.56581	2.61323	0	0.849648	12.7374	2.89132	14.8537	10.4264	9.04456	13.6786	11.4425	9.8252	1.33077	7.43185	2.07981	8.69357	5.08583	3.71807	2.91538	2.49271	5.083993169999999	5.14778	5.2899	7.65504	14.3109	17.1372	17.4522	7.94823	14.138442390000002	9.127666340000001	6.73093
Toutatis	0.476886	2.61354	1.11091	0.728349	1.3665	1.25132	4.95972	0.509109	3.29704	0.60811	0	0	19.8234	15.234	81.1443	23.114783539999998	18.753	40.6074	0.32681	0.530817	0	0	0.245184	0.704781	3.49077	6.99327	0.718184	7.64545	6.04907	3.85851	1.72803	4.12421	31.1864	4.22253	3.37228	0.839141	2.06367	5.41187	4.37019	2.19328	4.01064	5.04236	4.56428	7.68965	1.23527	13.110947549999999	10.8252	7.21027	0.784741
UG1	0.32399	0	0	0	0	0	0.645491	0	0.57562	0	1.69175	0	0	0	0	0	0	0	0.551808	2.71761	5.74241	0	1.76902	0	0	0	0	1.40456	1.08964	0.803746	0.788884	0	0	6.45228	3.26921	15.2254	2.17153	1.8849088799999998	0.8086	0.206602	0	0	0.425857	1.25213	0.540025	1.37438	2.08752	1.33694	0
UG13b	0	0	0	0	0	0	0	5.33418	0	2.84753	0	10.2149	0.900634	1.43154	0.721024	1.15843	0	2.28582	0	0	0	0	0	0	1.4999249799999999	1.20603	0	0	0	0	0	0	0	0	0	0	0	0	0.525738	0	0	0	0	1.29896	0.5488	0	0	0	0.313374
UG14	0	0	0	0	0	0	0	0	0	0	0	0	0	0.902113	2.01552	0.538815	0	3.74388	0	0	0	0	0	0	0.376037	0	0	0	0	0	0	0	1.09514	0	0	0	0	0	0	0	0	0	0	0	0	0	0	0	1.52226
UG17	5.41982	1.81239	7.0483080099999995	2.7698619300000002	8.39419	4.61665	5.97272	6.4103910200000005	9.42446	2.40551	3.9574638699999998	2.51317	3.16424	5.00928	5.53978	9.08651	20.573858559999998	13.661805399999999	1.82115	4.7383	0	2.63714	8.25893	1.78875	15.3753	15.4617	9.9245	17.1574	10.947362420000001	11.9981	4.92017	4.56309	6.077248750000001	6.50263	3.18558	1.96317	4.5753772900000005	8.88047	9.60878	4.02916	3.82576	6.12295	10.5991	13.4125	14.2256	20.7284	22.7209	19.5455	2.20938
UG19_large	2.62644	2.18809	2.95744	0.749077	3.25002	1.3272024500000001	1.50735	0.779217	1.8331090700000001	0.713367	2.76197	0	1.00667	1.0303232100000002	0.77344	1.0742	0.679901	1.13323	0.263055	0.748496	0	1.05984	0.881698	0.841326	6.81407	3.06934	3.08407	3.05935	1.94251	0.652651	0.423638	0	0.6716011900000001	1.33053	0.486819	0.860628	0.800242	2.39759	2.76691	1.42281	1.59206	3.17367	5.69985	3.72357	4.3486	2.18469	1.26078	0	3.16965
UG22	0	1.01961	0	0	2.1759938500000002	0.689872	0.244413	0	0	0.305371	0	0	0	0	0	0	0	0	0	0	0	0	0	0	1.2292974600000002	4.69187	2.50992	0	0	0	0	0	0	0	0	0	0	0	0.704338	0	0	0	0	0	0	0	0	0	0
UG24	0	0	0	0	0	0	0.389223	0	0	0	0	0	0.511316	0.457967	0.499086	0.667058	0.534583	1.01853	0	0	0	0	1.28566	0	0	0	0	0	0	0	0.821073	0.455348	0.870677	0.648895	1.08451	0.949048	0	0	0	0	0	0	0	0	0	0	0	0	0.464818
UG26	0	0	0	0	0	0	0.358949	0	0	0	0	0	0	0	0	2.54583	0	0	0	0	0	0	0.388111	0	0	0	0	0	0	0	0	0	0	0	0	0	0	0	0	0	0	0	0	0	0	0	0	0	0
UG27	4.92985	3.68946	2.35413	3.2198	3.13602	2.42125	5.26738	3.99192	4.34054	8.29433	1.79261	7.040524019999999	4.13611	4.8065	1.74071	4.43494	5.1292	3.86664	2.0772	5.91982	5.08009	1.32017	5.303467749999999	5.786618799999999	1.69411	1.9640272200000002	3.78515	2.8610693900000004	3.33817	2.56454	4.66361	3.61225	4.03374	4.79683	5.8978854400000005	4.8142	4.54175	4.23349	4.8827	4.54559	4.23568	2.516	2.23533	1.2632	2.25128	1.5391	2.13749	2.06273	2.83369
UG29	0.613081	1.5533078599999999	0.58307	0	1.22074	0.634858	1.09796	1.50712	0.840691	2.69979	0.994182	0	0	0.590313	0	0	0	0	0	0	0	0	0	0	0	0	0	0.974062	1.44402	1.25995	0	0.836364	0	1.07302	0	0	0	0	0	0	0	0	0	0	0	1.469	1.25236	1.04596	0.322896
UG3	1.85492	1.1297486700000001	1.0979043099999999	0.547493	1.48893	1.08944	2.73906	4.33425	1.47421	3.92687	2.8854935399999997	2.58755	3.1042881199999997	4.40374	4.80861	5.68923	2.6818383800000003	4.99901	1.2887	1.16254	0.926733	0	2.78342	0	6.19794	5.80932	3.39437	2.1994206600000004	3.9375	2.40581	2.32976	1.78184	2.14061	2.11876	4.70885	4.24439	0	1.18157	0.653284	3.20349	1.5243	0.77189	5.12615	2.01624	6.10147	3.7916850900000005	6.68262	3.87869	5.86784
UG31	0.879638	0	0.672773	0.837489	0.484959	0	1.68399	1.0232	1.21778	0.374692	0.596509	0	0.396561	1.27546	0.875529	0.255309	0.65646	0	0.330323	0.352825	0	0	0.461318	0	0.863112	0.7619362000000001	1.84378	0.656834	2.15847	0.833198	0.973497	0.97853	0	0	1.59812	0	0	0.968446	0.756199	1.09264	1.05001	0.689682	0	0	0.476	0	0.93297	0	0.665921
UG36	5.85342	16.4426	6.9578562999999995	10.6375	9.640391339999999	11.8602	8.40045	16.5181	16.4108	8.37675	4.93132	7.66813	0.498276	3.64892	1.68765	4.06782	2.9550993500000002	1.42563	0	0	0	0	0	0	7.53773	6.546508579999999	5.74464	19.506496000000002	22.897820799999998	26.4218	1.32965	4.6169	0.900002	16.0188	12.4621	8.35998	0.769776	4.35229	8.0037	9.36037	12.6005	11.3984	6.61856	3.98787	9.33871	17.4536	26.6037	24.2757	2.18762
UG39	3.20906	4.58639	3.1874711700000002	6.40885	1.76107	5.49601	2.41392	6.754917870000001	2.97285	5.2002570299999995	2.90808	4.05081	0	0.995499	0.510455	1.17247	0.633923	0	0	0	0.474375	0	0	0	0.275119	0.216772	0.830907	2.1825325700000002	1.50871	0	1.01823	0.705857	0.887789	1.04497	1.69122	0	1.37292	0	0.434665	1.6433	0.950591	2.15442	0	0	0	0	2.05092	0	0.459328
UG4	0	0	0	0	0	0	0	0	0	0	0	0	0	0	0	0	0	0	0	0	0	0	0	0	3.07637	1.64779	1.49697	0	0	0	0	0	0	0	0	0	0	5.52005	4.12379	1.00417	0.896941	0.637584	2.05563	1.02608	1.80547	0	0	0	0
UG5_small	0	0	0	0	0	0	0.136287	0	0	0	0	0	0	0	0	0	0	0	0	0	0	0	0	0	0	0	0	0.26533	0.358584	0	0	0	0	0	0	0	0	0	0	0.154482	0	0	0	0	0	0	0.276375	0	0
UG6	0	0	0	0	0	0	0	0	0	0	0	0	0	0	0	0	0	0	0	0	0	0	0	0	0.730573	0	0	0	0	0	0	0	0	0	0	0	0	0	0	0	0	0	0	0	0	0	0	0	0.732788
UG7	0	0	1.16996	0	3.97345	0	0	0	0	0.501225	0	0	0	0	1.98363	0.771088	0.878144	0	0	0	0	0	0	0	1.84057	1.61289	0	0.412558	0	0	0	0	0	0	0.570079	0	0	0	0	0	0	0	3.71593	2.38012	2.5125619599999998	0	0.51275	0	0.254514
UG8	3.47399	2.5386792099999997	2.2316211299999997	1.9201	3.3839241799999997	2.21569	4.02944	1.90718	2.85879	4.01668	6.5761	3.11404	3.3202214800000003	5.84506	8.54194	6.58841	4.66085	5.22898	2.52053	0	0.561237	0	0.940711	0	4.65134	3.47574	0.483528	3.86582	5.69048	4.5419287100000005	1.45626	1.31741	3.55319	1.60697	0.83672	1.79602	0.728782	2.60729	1.7512105199999999	2.6144	2.22761	3.5742	1.7213482400000002	2.5058	2.3952267000000003	3.55862	7.77101	6.43661	2.97532
UG9_large	0	0	0	0	0	0	0	0	0	0	0	0	0	0	0	0	0	0	0	0	0	1.31664	0	1.52473	0	0	0	0	0	0	0	0	0	0	0	0	0	0	0	0	0	0	0	0	0	0	0	0	0
UG9_small	0	0	0	0	0	0	0	0	0	0	0	0	0	0	0	0	0	0	0	0	0	0	0	0	0.374581	0.596014	0	0	0	0	0	0	0	0	0	0	0	0	0	0	0	0	0.543587	0	1.3838612700000001	0	0	0	0
Upx	3.00093	1.00141	1.05228	2.50516	2.09705	0.619152	4.81106	1.6981294400000002	2.47962	2.83896	0.801282	2.13255	1.53213	2.7451	1.2798355799999999	1.59299	0.821414	0.731761	0.310584	2.1988599300000002	2.5464	0.888454	5.21935	2.9127836900000004	6.01162	3.66788	5.07854	3.14474	3.6894185000000004	5.67504	3.06259	0.69452	0.999899	3.1963	3.73979	2.66943	1.12494	2.41353	2.9054	2.3172210599999996	1.80589	3.14764	3.10716	2.52935	3.70128	0.718588	3.72125	1.5971820700000001	1.76203
Uzume	35.0043	17.1831	27.3784	19.5092	31.8744	22.0419	38.2117	20.8884	24.2025	37.9341	26.6125	30.1104	65.8087	45.7211	38.4972	50.817	34.1822	28.4058	61.2559	27.1234	36.1591	81.30878231000001	40.1381	78.1904	19.0788	32.9307	19.0736	25.5106	29.5168	18.226222789999998	33.5472	29.768	26.2341	46.6134	36.4256	31.8437	29.4662	42.9314	34.3111	47.0558	38.8573	47.6167	18.1482	23.4192	19.1724	17.7538	34.689	30.2392	66.2211
VP1796	0	0	0	0	0	0	0	0	0	0	0	0	0	0	0	0	0	0	0	0	0	0	0	0	0	0	0	0	0	0	0	0	0	0	0	0	0	0	0	0	0	0.208953	0	0	0	0	0	0	0
VP1826	4.42633	2.57663	9.92162	5.08985	8.25073	6.13873	6.06068	6.07582	7.55678	6.19367	8.67257	6.26678	20.0714	21.4069	19.5568	18.1825	15.0424	14.0671	3.0422292900000003	1.58134	4.74349	18.8275	14.0487	8.44168	27.0136	27.0474	11.0176	9.0372	7.92665	2.25046	15.1956	9.7806	14.03	5.10272	6.74462	4.0140983199999996	16.3084	27.0625	24.1608	13.946690330000001	12.4368	11.797	12.4924	14.2057	17.4466	3.707	6.75274	4.05012	30.6375
VP1839	5.8342946300000005	3.1451974799999998	4.37748	3.0186984900000002	4.8905461500000005	11.1866	12.5697	8.80395	10.8916	8.930578220000001	7.13242	9.38508	21.5558	22.1585	19.326434940000002	19.6754	19.1441	14.9513	12.4316	3.0362	6.3443470699999995	2.9962	9.16229	6.79691	14.3277	22.996234219999998	13.3781	12.7926	12.198	14.1366	14.1922	24.5609	19.7369	29.6295	31.7967	18.1691	5.03765	13.9685	15.2041	12.4119	12.8861	11.9954	8.00431	13.33	10.1632	10.0461	17.7378	11.0786	14.2178
VP1840	1.1848577599999999	1.32658	4.20964	8.25775	5.14638	11.8926	4.59154	5.19056	2.60206	5.15209	3.8802448800000002	8.68939	4.70706	4.59487	2.39902	4.24957	4.25464	4.59561	0	1.39295	0.641756	0	3.35309	0	11.9614	6.59513	6.01799	1.47567	1.8839441099999998	1.91788	2.03893	2.04074	1.87817	3.3042	5.37466	2.27528	1.78679	0.54724	3.8804	2.94822	2.78358	3.33232	4.36606	5.16423	5.13806	0.579913	3.19879	0.66751	3.74045
VP1848	0.960617	0.346814	0	0	0	0	1.71468	0.472744	0	0	0	0	0	0	0	0	0	0	0	0	0	0	0	0	0	0	0	0.269755	0	0.879906	0	0	0	0	0	0	0	0	0	0.656278	0	0.686324	0	0	0	0	0	0	0
VP1851	35.8826	23.5213	30.699457170000002	28.8894	37.0589	32.5458	34.1496	5.62455	16.5832	22.4748	48.345	27.3817	7.6672978999999994	10.9222	8.26084	5.48935	4.76624	4.9026	4.35487	13.2454	20.9752	35.295	9.66014	11.201777700000001	13.138445449999999	13.5981	12.121691669999999	5.8783664600000005	7.39734	3.35462	6.028748480000001	6.44858	5.2517660799999994	6.07005	3.31966	2.92087	6.68851	7.3579	7.77508	9.0523	6.32361	8.216473839999999	13.7768	11.5405	14.0357	6.67684	8.2645	4.49592	9.12901
VP1853	12.2529	8.28544	10.9127	6.15845	7.745182890000001	6.15014	17.6693	10.712847629999999	8.45294	6.83015	13.1124	10.0202	29.7538	35.0193	34.3499	29.143519050000002	25.4186	26.309635959999998	10.3442	16.7587	21.175103999999997	85.97260505999999	24.563064460000003	40.137	12.0084	16.2937	8.186599170000001	8.57786	9.48514	5.75594	16.2293	16.456	24.6048	10.4458	11.5994	7.16888	12.7967	16.9388	16.6476	37.2644	27.2386	25.4661	6.6427638799999995	7.5559	11.3104	10.002085130000001	10.0537	7.14503	20.9396
Veles	2.9825	2.69645	1.43744	0.863291	1.02252	1.15415	2.99827	2.54092	2.09978	2.70365	3.05208	2.27002	0	0.77134	0.48407	0.75624	0.602864	0.769357	0	0	0	0	0	0	0	0	0	1.20368	1.10889	0.814252	0	0	0.391864	5.48694	2.07667	2.81963	0	0	0	2.50859	2.47221	3.75849	0.573849	0	0	1.23198	1.62034	1.29993	0
Viperin solo	11.3339	19.2252	11.3797	65.4581	17.6488	31.3425	17.3916	24.2867	16.6821	21.4607	15.3235	17.9575	8.026058520000001	11.365870919999999	3.61585	17.2114	16.451	9.338321489999998	2.65161	3.62962	4.6595	0.394004	10.9387	4.984	26.025899199999998	31.798789629999998	32.479	31.8225	24.9528	38.5144	11.9691	13.4876	5.2040519100000004	17.5192	21.3803	13.8963	17.1342	16.824084290000002	24.41	13.4365	8.79856	12.1031	33.5708	39.908004559999995	41.941	32.2818	43.1427	30.3321	7.7630684599999995
Viperin-TPR	7.982765430000001	11.6351	10.5668	6.18314	17.425202589999998	9.15103	11.5807	24.6398	14.5566	16.8456	8.27726	9.89084	10.3891	12.038	16.0105	17.2299	13.4902	10.6504	2.28324	5.10418	6.8228487300000005	12.2104	7.22928	6.68928	16.5433	10.1896	6.1488187100000005	17.1783	17.4755	13.425	3.60531	6.2345	8.5654	19.2174	11.8363	10.8505	2.472	7.40269	7.01339	16.3864	13.8009	20.1898	7.79781	6.16592	10.8607	15.1152	24.113860510000002	14.7317	17.4382
Viperin-Toxin	0	0	0	0	0	0	0	0	1.05902	0	0	0	0	0	0	0	0	0	0	0	0	0	0	0	0	0.319129	0	3.20093	1.3671	0	0	0	0	0	0	0	0	0	0	0	0	0.193904	0	0	0	0.509821	0.297881	0	0
Wadjet type I	61.1317	42.7638	29.6635	24.9275	33.6262	27.3951	42.4182	31.8438	45.1969	39.4552	23.0683	35.2751	48.575511490000004	44.0284	41.0888	40.5627	36.3879	46.4735	23.0252	41.291	46.714238710000004	15.0598	62.7926	43.7765	99.4855	88.417	94.8219	54.6214	47.1772	37.1592	64.395	57.6152	43.7068	48.5056	65.4934	52.2587	103.282	113.091	113.40389336999999	73.325	74.6355	80.6094	82.7991	49.7647	70.6809	38.4156	40.4642	33.9401	57.7218
Wadjet type II	2.57835	4.48618	3.49639	4.423501620000001	5.3697	6.81859	6.96191	3.74886	7.04347	8.63773	3.3927252599999997	5.7109	6.10691	9.87477	6.15745	8.07073	6.07033	7.97353	3.1987376199999997	10.4229	5.80282	0.828599	9.98217	9.13046	3.2801280999999998	7.75657	6.02019	7.5166483500000005	6.95042	8.32431	7.9981	7.88334	1.74656	3.75356	13.2214	7.49549	4.125672570000001	2.48377	3.4474896299999997	6.83966	4.54281	4.15801	0.499636	2.94945	2.93977	5.4746600999999995	8.33433	7.3076313200000005	7.290255370000001
Wadjet type III	3.44767	2.31202	2.09546	1.52748	1.7465	0.576733	3.87067	4.04339	1.40657	4.27696	1.74955	1.07967	3.11582	3.94781	4.75596	4.24373	4.10586	3.70351	0	0.8693499100000001	1.9674	0.466093	9.7256	7.97932	0.583172	1.23049	1.58435	0.939261	0.779481	0	2.56545	2.26601	2.39042	5.57242	7.71578	2.82026	2.26234	2.39845	3.24797	3.33818	2.71932	4.03101	1.76346	0.662168	1.59165	1.16542	1.05696	0.541824	11.7886
Zorya type I	16.0897	13.6891	10.6578	9.139935000000001	16.1245	10.4043	18.2278	21.7082	23.9885	18.2859	11.7627	13.8228	22.2216	24.5641	35.1681	33.2912	30.8317	27.8454	68.7101	11.9782	46.7302	18.853	14.7564	19.853977699999998	10.9197	14.4543	6.10653	26.362748330000002	19.8652	17.951271639999998	20.8127	22.2284	21.0656	27.416	33.5014	72.8333	9.82419	12.7249	13.766985159999999	16.9298	16.8991	18.4812	10.539	14.1751	14.1436	31.431966290000002	29.1785	30.9444	24.149448369999998
Zorya type II	1.89484	0.873291	1.35612	3.2659057999999996	1.65963	2.3821	3.43879	3.3579	7.68182	3.2789	5.25824	1.36187	8.52334	6.709596299999999	17.3581	4.64918	0.508481	2.8634844900000003	3.82261	1.20339	0.807815	2.4839198199999997	6.21733	0	2.86514	10.0766	2.49666	16.4042	11.9786	7.63955	15.4231	9.88837	23.331	8.33397	8.11968	6.02281	10.9001	11.046843039999999	10.7347	10.9664	9.747263140000001	11.1537	3.17649	8.44913	7.6397669200000005	11.929189829999999	12.3907	9.285770600000001	6.0278955100000005
Zorya type III	15.4689	21.9364	13.307566529999999	15.535209009999999	12.217386939999999	19.5916	8.22967	13.2975	15.6077	15.411730599999999	6.30856	12.1373	0	6.03655	0.804081	0.849993	0	0	5.11443	10.4028	14.5674	1.33437	6.218619840000001	0.841759	63.195	38.1989	48.8654	30.7862	26.734	14.5012	8.24255	10.3407	7.83525	10.1003	4.24076	3.79053	35.1597	47.5029	55.5154	28.832638940000002	34.2794	43.216456019999995	61.3733	27.770670889999998	44.403	22.6703	20.3406	15.877	17.4152
dCTPdeaminase	5.72492	20.7629	6.43022	12.1207	8.07785	14.895	7.10377	13.946869020000001	14.8558	14.1012	7.7778513799999995	10.7546	17.4285	16.5778	46.2257	13.0684	11.865665700000001	10.686639079999999	32.7888	16.1481	14.4591	60.4206	9.32742	14.879	16.3603	20.588	10.5431	28.090625759999998	27.7145	17.043	11.2687	9.54408	27.3059	18.7024	13.8584	24.3354	11.2117	11.7194	16.8454	20.821989090000002	19.0279	26.5527	21.3618	23.521553570000002	28.51	20.478736480000002	30.4857	18.1596	25.9267
dGTPase	4.07308	4.79438	8.01816	3.20847	8.33172	2.77067	15.6001	7.67906	21.4072	5.27093	8.767	1.04384	13.143254169999999	23.0178	32.4545	19.055	15.3564	16.9801	4.304	13.1533	10.1609	11.8728	10.1277	8.88791	7.58859	34.3116	11.9377	39.9923	31.269	24.3664	34.5185	36.4389	36.0492	31.266	20.5918	17.5137	4.91972	7.42587	7.50889	20.9728	12.0158	23.4086	14.6303	28.2716	16.4287	30.132710369999998	31.8095	32.9134	31.6042
gcu142	0	0	0	0	0	0	0	0	0	0	0	0	0	0	0	0	0	0	0	0	0	0	0	0	0	0.971647	0.853512	0	0	0	0	0	0	0	0	0	0	1.58028	1.68855	0	0	0	0	0	0.629552	0	0	0	1.45837
gcu167	0	0	0	0	0	0	0	0	0	0	0	0	0	0	1.27014	0	0	0	0	0	0	0	0	0	0	0.336882	0	1.35082	1.07628	0.625205	0	0	0.499194	0	0	0	0	0	0	0.983862	0.755065	0.544054	0.606285	4.77022	1.11915	2.56107	3.01808	1.85273	0
gcu233	2.72255	1.2082644999999999	0.596518	0	1.30365	0.830467	2.7726553999999997	1.3367831200000002	1.5722	1.09886	3.76763	1.35605	1.61538	3.7575090099999997	1.78368	2.2615529899999998	0	0.754874	3.28042	3.6390597099999997	1.61999	5.272	3.56882	7.12912	11.7153	6.15335	4.78284	0.985333	1.5276489400000002	0	0.860346	2.5952650200000003	0.995971	0	0.376765	0	6.32318	6.64056	5.85075	2.08886	4.11829	3.2413003199999997	8.0328	7.74259	7.509850200000001	2.81301	2.6888012999999997	1.7423430199999999	9.11171
gcu24	5.49389	9.00252	1.93516	8.333958410000001	6.53565	8.037007710000001	6.59304	11.1398	8.89342	10.2723	1.14956	8.39094	8.16507	11.261625800000001	9.331098449999999	14.550769110000001	13.7643	11.479406070000001	2.54505	3.0020521799999997	2.62984	2.35379	9.02351	3.05783	7.45768	13.5969	6.12086	14.8668	16.6164	15.2185	8.84883	12.3807	20.4836	17.1596	12.4894	8.94322	9.31206	10.5278	13.0129	18.6764	15.6303	19.5187	6.52244	7.93738	12.6163	15.3676	22.5433	11.9651	8.18436
gcu76	50.5655	46.5088	41.6696	29.357	36.6336	33.6736	36.0212	27.3852	22.209	34.3571	30.6125	31.6271	1.88856	6.25562	5.71062	4.11541	2.00083	2.90685	1.50654	2.0223937100000002	4.52326	2.601	2.55177	2.54293	41.7539	23.0488	25.5464	14.9426	12.5473	7.4555965099999995	2.6647260200000003	4.19771	4.8212649800000005	14.1034	5.15747	5.61788	14.958343990000001	22.4634	24.4255	26.4833	25.3396	38.4977	31.6878	13.6252	24.214961900000002	13.9472	14.893	8.83751	7.37517
gcuWGS21	0	0	0	0	0	0	0	0	0	0	0	0	0	0	0	0	0	0	0.222044	0.452778	1.38756	0	0	0	1.41823	1.16825	0.851794	0	0	0.673323	0	0	0	0	0	0	1.34042	0.782619	1.83329	0	0.989956	1.00036	1.56364	0	0.987305	0	0	0	0.941749
pAgo	2.8401	0	3.30732	3.5584	2.92967	1.84797	7.4830159300000005	2.0323052600000002	0.523016	2.40196	5.81007	3.08424	0	0.326689	0	0	0	0	0.444498	1.33919	1.6865732000000002	2.34441	1.7415882799999998	0	1.68927	1.5170793200000001	2.9653379699999998	0.480316	0	1.05951	0	0	0	0	0	0	0	2.28999	0.916389	0.591732	0	0.619946	1.88416	1.85568	1.5553662499999998	0.586555	0.503583	0.835345	0.874398
pAgo LongA	0	0	0	0	0.375931	0	0.488196	0	1.1968	0	0	0	0.409876	0.699088	0.446566	0.6991285700000001	0.569941	0	0	0.629313	0.974994	0	0.571124	0	0.466433	0.501153	0.800403	3.61789	1.2472571399999999	1.09596	2.06248	0.977833	1.47097	7.654157980000001	4.03524	16.6584	0	0	0.937907	0.870362	0	0.570315	0	0	0	1.19256	3.34386	1.85416	1.59285
pAgo LongB	16.9617	6.05685	42.5738	33.1118	34.5292	47.8763	36.4614	29.0331	7.70376	17.9771	45.2494	43.0471	2.70884	3.40993	3.94212	4.37341	2.2099	2.8592477400000003	0	0	0.827347	0.757112	2.4951253300000005	1.30419	22.9641	21.7525	20.6034	7.91307	6.6203050900000004	20.6966	2.37016	0	2.3354451999999997	3.36738	2.28786	3.87198	4.05491	2.92507	5.64639	3.55955	1.58842	2.20538	10.1702	18.6375	13.1194	2.54844	6.00902	4.20429	8.83051
pAgo S1A	2.18866	0	1.8818979800000002	0	2.55218	1.01891	4.7868	2.34813	0.851614	5.0709	1.43604	1.77861	0.81187	3.7235	1.74652	3.8627629199999998	2.89184	2.09929	0	3.3857276499999998	3.5763117700000002	5.98407	1.70453	0	2.3976946800000003	2.07508	2.54401	1.11153	1.26265	0.532039	5.844	0.665867	1.38881	3.25773	4.793	1.00408	0	3.7185	3.47144	6.81103	2.9894	4.94187	1.36564	0.43272	1.25633	0	1.14199	0	4.69711
pAgo S1B	4.49468	6.48758	2.1413632600000003	2.84443	5.34709	1.68012	6.18059	3.46145	1.816	5.5034	6.4432037300000005	3.66732	4.48564	7.9067275299999995	3.5909	6.5048	2.60515	3.00701	0.845627	1.8459550999999998	3.58306	6.4838578899999995	2.64402	2.63139	1.8566773900000002	2.63928	0.366	1.69525	1.35776	1.97214	1.2384141899999999	1.4525569299999999	0.678947	5.00391	3.7221	2.11222	0.944389	2.1385	2.25632	6.11112	4.14302	5.15329	0.704774	1.46649	2.15014	0.798096	0.501684	0.744004	2.16074
pAgo S2B	2.05058	1.28253	0	0	2.09896	0.600764	6.40075	1.2703	0.439391	1.3625879300000001	2.4480842700000003	1.43975	1.93447	1.9278938399999999	1.27599	1.92408	2.3668864999999997	0	0	0.579189	1.98669	3.87492	4.83614	4.44525	1.04299	1.32925	0	0.441018	0.332432	0.965783	2.36197	0.668116	0.41449	2.31413	2.94995	3.0054260299999997	0	0	2.05173	2.9702	4.21398	3.36331	0	0.856026	0.713772	0	0.5187912100000001	0	4.18868
pAgo SPARTA	3.04172	3.84838	3.46541	3.27568	6.78684	4.14458	6.08429	1.9788281900000002	0	4.52222	8.0952	1.49147	0.886285	0	0	0.567279	0	0	0	1.33032	1.7498592199999998	0	0.7740620899999999	0	0.392953	0.9976066699999999	1.29115	0.335852	0	0.798059	0.666029	0	0	2.01813	0	0	1.22559	0.638962	1.96029	3.64659	4.0014	3.28428	1.83116	0	0.7416070100000001	0	0	0	1.1655
pAgo type I	0	0.655398	0	0	0.744022	0	0.269327	0	0	0	0	0	0	0	0	0	0	0	0	0	0	0	0.334769	0	0	0	0	0	0	0	0	0	0	0	0	0	0	0	0	1.14481	1.59128	1.01642	0	0	0	0	0	0	0
Plasmid
Defense_Subtype	Sample_01	Sample_02	Sample_06	Sample_07	Sample_11	Sample_12	Sample_40	Sample_41	Sample_45	Sample_46	Sample_50	Sample_51	Sample_28	Sample_32	Sample_36	Sample_67	Sample_71	Sample_75	Sample_16	Sample_20	Sample_24	Sample_55	Sample_59	Sample_63	Sample_03	Sample_08	Sample_13	Sample_42	Sample_47	Sample_52	Sample_29	Sample_33	Sample_37	Sample_68	Sample_72	Sample_76	Sample_17	Sample_21	Sample_25	Sample_56	Sample_60	Sample_64	Sample_04	Sample_09	Sample_14	Sample_43	Sample_48	Sample_53	Sample_30
3HP	0	0	0	0	0	0	0	0	0.724769	0	0	0	0	0	0	0	0	0	0	0	0	0	0	0	0	0	0	0.747087	0.981699	0.87842	0	0	0	1.01171	0.735539	1.41243	0	0	0	0	0	0	0	0	0	0	0.281332	0	0
6A_MBL	2.29331	9.58477	0.66713	6.9357579000000005	1.21575	7.3509056600000005	3.10317	6.820881399999999	5.12064	4.41809	2.9419595899999997	3.88365	8.76379	7.92315	12.3142	16.929	19.6528	17.5509	4.6325026099999995	2.83589	3.85726	10.6591	8.60155	31.1914	5.08239	7.61188	3.51945	5.3253	5.91358	4.75294	5.72192	7.8542204700000005	13.6755	3.68598	2.9659509699999997	2.05268	4.59618	6.5501539399999995	7.53531	7.4240281999999995	5.56219	6.22063	5.15	4.63317	7.40804	6.025700619999999	6.22636	5.068129669999999	13.1618
AVAST type II	0	0	0	0	0	0	0.879975	0.733709	1.21748	1.10924	0	0	7.87789	1.11077	3.1861	2.26636	0.505811	1.80506	0	0	0	0.601887	1.6969566299999999	0	0	1.27467	0.718234	3.9852886599999997	2.14592	0	1.58609	0	0.691697	0	4.110087419999999	0.695397	0	0	0	0.888126	0	1.1205258599999999	0	0.659525	0	0	0.359082	0	0.80178
AVAST type III	2.30105	3.8693446000000002	2.0880677299999997	2.97263	1.23369	2.76637	3.45839	3.41612	5.89502	2.28275	1.6277233299999998	1.86293	8.411062379999999	8.10658	18.8953	11.721921179999999	8.33353	8.66996	11.5544	2.30258	2.60965	9.95507	3.94002	5.5627191499999995	3.23343	4.18306	2.12742	9.88448	9.19946	6.28495	7.14488	7.77877	16.2615	10.3666	5.84935	8.411482789999999	2.94627	5.41706	5.25453	6.10908	6.22438	6.9181186299999995	3.0244372999999998	3.95871	4.70858	9.640767649999999	10.3843	8.41816	4.98384
AVAST type IV	1.26139	1.01124	2.42637	1.90178	2.28855	1.44507	2.55319	1.35537	2.29736	1.09396	2.33651	0.823533	0.787414	1.5206879300000002	2.58795	0.688243	0	0.755463	0	0	0	0.494551	2.45798	0	0	1.03804	0	1.4410300399999998	1.4150350999999999	0.475679	1.4709363500000001	1.5083924400000002	4.41063	1.4517213500000001	0.793308	0	0	1.74781	1.65318	2.02151	2.2908755999999997	2.7959769999999997	0	0	0	1.6561	2.15945	1.23981	0.232331
AVAST type V	0	0	0	0	0	0	0	0	0	0	0	0	1.35434	1.14427	3.66288	1.51347	0.872757	0.930976	0.387802	1.2301	1.04116	2.58043	1.30383	1.96509	0	0.364701	0	0.42728	0	0	0	0	1.09544	0	0	0	0.893066	1.1306	0.922348	1.2894	1.47282	1.93156	0	0.948417	0	1.44837	3.3454834300000003	1.28591	0.304588
Abi2	1.49934	1.87503	0.979741	1.38053	1.58499	0.8783	2.43518	0.970089	1.72909	1.60854	0.622554	1.50698	0.634462	1.52675	1.06491	1.70574	0.924118	1.38909	0	1.59628	1.9467246399999998	0	4.65839	0	0.979729	1.74744	2.7166	1.3815857299999998	1.33813	1.02558	0	0	0	1.79864	2.87936	1.02001	2.64964	1.66216	3.17659	2.89719	1.92731	3.10912	0	0	0.491007	0.498573	0.834065	0.604726	1.48194
AbiA	0	0	0	0	0	0	0	0	0	0	0	0	0	0	0	0	0	0	0	0	0	0	0	0	0	0	0	0	0	0	0	0	0	0	0	0	0	0	0	0	0	0	0	0	0	0	0	0	0
AbiAlpha	0	0.497505	0	0.546357	0	2.42898	0.903035	12.1813	0.754891	10.5671	1.7839	7.8942616999999995	4.49766	2.7022926800000002	2.14618	1.84233	0.864871	0	15.465205399999999	12.9979	21.7122	312.583	35.0289	57.35025350000001	0.339446	2.0554	0	1.63377	1.9328011100000002	1.29436	3.43392	2.8073867999999997	3.85267	1.03713	0.932999	0.879597	5.61998	6.990131570000001	4.93236	11.7615	10.3858	6.0802	0	0.948417	0	2.21719	3.79668	2.0187940500000003	9.06128
AbiC	0	0	0	0	0	0	0	0	0	0	0	0	0	0	0	0	0	0	0	0	0	0	0	0	0	0	0	0	0	0	0	0	0	0	0	0	0	0	0	0	0	0	0	0	0	0	0	0	0
AbiD	18.594	19.3935	10.6598	14.3042	15.680358120000001	21.2713	19.8703	20.6383	24.4143	24.2662	12.9126	13.7807	16.7011	24.5969	28.4088	23.8069	27.2126	19.1725	22.781796449999998	26.1954	29.8016	38.2244	32.9504	36.8008	19.1361	38.3695	22.975128729999998	23.1979	26.1206	15.6255	54.2975	33.342345800000004	57.948	36.9308	27.6745	121.723	33.3062	41.187	38.6278	38.9019	35.048234199999996	34.561	17.5075	24.712199469999998	35.1647	28.2577	33.9817	19.8292	63.1267
AbiE	141.475	148.223	130.68	108.79816450999999	131.935	133.545	190.676	140.08	168.528	164.083	145.969	152.221	216.38	200.147	258.639	160.426	174.513	138.906	68.5202	111.359	217.194	172.008	157.462	338.585	91.3928	119.674	93.3947	163.103	146.785	97.4423	142.825	130.486	147.865	134.333	139.582	117.857	128.197	157.1	148.946	229.807	213.047	218.514	77.618	77.4101	89.3457	110.69159862000001	135.903	96.1465	151.1
AbiH	9.72456	6.79284	3.78079	4.31899	6.55835	5.19879	10.9998	7.02801	11.9304	10.2127	8.7001	11.3631	18.9318	14.257768650000001	20.9646	13.0423	13.11	11.7299	9.15724	10.2371	15.3817	61.6449	25.8106	56.7156	3.6346033699999998	5.52019	5.62778	6.50944	8.204660969999999	3.96568	9.654665309999999	7.050807799999999	11.5545	8.19826	10.5917	9.267860559999999	9.17605	10.031	11.6676	14.1192	12.2001	10.6261	2.29116	1.26528	4.43155	3.60534	4.82581	0.788673	7.8288566500000005
AbiI	3.96318	0	6.12844	0	6.9838792000000005	2.84081	6.823191899999999	0.722612	3.8683978999999997	0.739482	12.9284	2.53376	0	0	0	0	0	0	0	0	0	0	0	0	0	0.921489	0	1.61295	1.40385	0.792248	0	0	0	0	0	0	0	0	0	0.397456	0	0	0	0	0	0	1.59027	1.93574	0
AbiJ	3.08224	1.61205	2.40366	1.07914	3.71142	4.12981	2.88195	4.25383	11.8481	3.54208	3.3308943500000003	3.46961	17.244	12.8313	14.5207	10.0468	13.0031	8.36158	7.01228	5.85882	13.9415	76.6765	12.867401529999999	30.6	6.32393	12.990704489999999	4.261734799999999	18.711	17.1394	2.97159	6.549960100000001	6.75193	8.08171	2.5228807399999997	1.30948	1.57839	6.11807	11.163958449999999	5.82666	20.2891	14.6998	9.9805	4.7466595400000005	5.93733	5.53671	7.56741	6.34613	3.41921	13.254137199999999
AbiK	0	0	0	0	0.577473	0.751881	0	0	0	0	0	0	0	0	0	0	0	0	0	0	0	0	0	0	0.704171	1.15127	0	0	0	0	0	0	0	0	0	0	0	0	0	0	0	0	0	0.818369	0.698549	0	0.384329	0	0
AbiL	25.1592	26.310661590000002	18.1354	16.9346	23.4676	16.8382	28.3904	26.3661	29.7339	23.8575	37.9032	20.3552	24.0162	28.1959	24.0887	27.2592	19.9037	20.7807	7.316970100000001	10.9216	7.21361	13.6386	17.212	6.42197	17.367189709999998	22.1082	18.2176	25.5721	28.4288	20.1342	38.5826	34.9683	29.411791530000002	27.6207	33.5114	19.6884	17.5501	17.4291	18.4652	30.242216459999998	28.0342	30.069	10.5689	13.9556	17.7462	25.5111	30.3254	21.559	21.6983
AbiO/Nhi	1.74485	1.70756	1.21919	1.8748217999999999	1.63135	0.640071	2.59931	1.6156422799999999	2.0300077400000003	2.36782	0.566031	1.9027348300000002	2.53252	2.22104	1.3836847300000001	1.56139	1.9789906099999999	1.83986	1.6071403499999999	2.4052160000000002	2.4138710999999997	0.38273	2.94104	1.22849	3.7158659600000004	2.93011	3.46712	2.45205	2.41988	1.7764911300000001	2.53737	2.0130791500000003	2.0377	2.47044	3.98421	3.2041967999999996	3.26891	2.66011	3.35421	2.72186	3.13768	2.15222	0	2.45341	3.1780673999999998	1.47331	3.8149073700000002	4.35615	0.954241
AbiP2	6.36281	7.16213	3.75986	5.05814	4.57341	3.10922	7.16472	5.7109193000000005	5.28511	8.75473	2.8357031299999997	5.81988	3.38029	2.54411	1.77855	2.42636	2.99107	2.07114	3.82583	5.26607	5.1603004299999995	2.31577	12.2264	1.95134	4.09671	4.4939	6.91379	4.11416	4.30581	4.3788502000000005	2.0282329800000003	1.01197	0.994258	3.44568	5.03426	1.69263	5.98839	5.92806	7.38538	5.70462	5.28078	4.92261	3.58783	2.6087386599999998	4.5331	2.56095	3.12884	3.0323747500000002	1.7143
AbiQ	1.9561485699999999	1.3357297300000002	0.792558	0.638761	0.977808	1.47299	2.278	0.8465	1.54849	1.4378	3.16028	1.66463	1.7579	3.0373	0.9008648100000001	5.95701	2.08049	1.72567	4.08054	1.88296	2.3922693500000003	24.7546	13.6719	22.9231	1.40677	4.7746	1.56354	1.56592	0.568175	0	2.99195	3.67107	5.43529	0.478186	1.8483109500000001	0.514995	4.04059	4.69799	0	2.47474	1.08175	2.10114	1.69529	3.1956501399999997	2.62806	1.12527	4.8612	4.6206179800000005	1.8477455699999998
AbiR	0	0	0.566467	0	0	0.534543	0.204076	0	0	0	0	0	0	0	0	0	0	0	0	0	0	0	0	0	0	0.211168	0	0	0	0	0	0	0	0	0	0	0.743016	0	1.6153	1.11034	1.52431	1.99473	0	0	0	0	0.270879	0	0
AbiT	0	0	0	0	0	0	0	0	0.584485	0	0	0	0	0	0	0	0	0	0	0	0	0	0	0	1.2511390699999998	4.24287	2.69401	2.67776	2.77856	2.17727	0	0	0	0	0	0	0	0	0	0	0	0	0.504609	4.287777999999999	1.81685	2.2055546699999997	4.197825999999999	7.1175540999999996	0
AbiU	0.8625	1.64524	1.48962	1.67156	2.72634	1.17243	2.2171	2.09614	0	1.89099	1.046	1.17752	11.3296	10.7771	8.49726	9.72134	13.4319	5.3862280600000005	4.72126	5.14466	8.9526	44.4144	8.46326	27.28	0	1.5391241299999998	0	1.97431	2.53398	1.09648	5.72314	5.13825	3.9547103000000003	5.2144210300000005	3.6768	3.1928193800000004	6.6887609999999995	7.01621	5.4262	9.94484	9.71058	9.8612	0	0	0.486776	0.620286	2.73002	1.6559009900000001	5.21022
AbiV	0	0.662481	0	0	0	0	0	0	0	0	0	0	0	0	0	0	0	0	0.467748	1.74864	0.990565	0	0.62058	0	6.1880220999999995	5.04703	6.98487	0	0	0	0	0	0	0	0	0	1.91109	2.08511	2.4202	0	0	0.302541	18.0934	15.109	21.4144	3.54837	3.59082	1.04924	0
AbiZ	0	0	0	0	0	0	0	0	0	0	0	0	0	0	0	0	0	0	0	0	0	0	0	0	0	0	0	0	0	0	0	0	0	0	0	0	0	0	0	0	0	0	0	0	0	0	0	0	0
Aditi	1.94027	0.823302	2.76646	4.84812	3.8918	3.2853675900000003	5.17717	1.6898290500000002	4.71414	2.36704	2.77175	0	0	1.28964	0	0	0	0	0	0	0	0	0	0	3.72281	3.77743	1.81764	4.97903	5.10534	5.64728	0	0	0	3.08487	2.64646	1.39371	1.15318	0.965078	2.36023	1.4334	0	1.75648	3.38022	3.93324	4.386214880000001	2.55286	5.7400228900000005	4.23967	0
ApeA	0	0	0	0	0	0	0	0	0	0	0	0	0	0	0	0	0	0	0	0	0	0	0	0	0	0.560113	0	0	0	0	0	0	0	0	0	0	0	0	0	0	0	0	0	3.01614	2.30943	0	0	0	0
AspAB	2.97328	2.3692	3.53751	1.9946	3.70888	1.74394	2.74993	0.94045	0.895437	1.59199	4.14615	1.68037	0.6327	1.64532	0.437283	0.340932	0	0	0.468332	0.751939	0.73506	3.63037	3.35291	8.99662	0.521741	0.414828	0	0.440445	0	0	0	0	0	0	0	0	0	0	0	0.591199	0	0.695548	0	0	0	0	0.453028	0	0
Azaca	0.88184	0.948486	1.44237	0	0.584926	0.831359	1.31768	1.66018	1.38488	1.75392	0.561873	1.19455	1.33622	0.944247	0.533032	1.56824	0.769158	1.09044	4.694482900000001	13.1759	1.8564	0.568446	4.67961	1.05421	6.28269	4.08056	4.48184	0.76289	1.22542	0.916078	4.12675	1.96166	5.908081729999999	1.38315	3.67152	1.39551	4.08528	8.11009	7.95904	2.68152	0.817227	2.1571	4.3812	2.39607	4.27727	0.580833	1.40177	0.742582	2.8475186900000002
BREX type I	22.9697	17.7612	25.1864	25.2818	27.6895	19.7176	31.6786	39.9731	68.0199	35.5214	27.3248	30.2698	100.259	85.0114	107.005	68.538	66.945	59.6186	45.1374	73.1227	58.0747	276.858	81.2001	124.121	39.2467	96.90521140999999	47.0947	67.34171909999999	70.71038745999999	42.4253	92.0528	86.4897	144.181	46.7035	40.2598	101.92920000999999	100.174	130.987	97.2773	166.25057078999998	172.197	122.58	39.2014	51.8942	64.1658	75.7864	56.8566	47.1741	162.764
BREX type II	0	0	0	0	0	0	0	0	0	0	0	0	0	0	0	0	0	0	0	0	0	0	0	0	0	0	0	0	0	0	0	0	0	0	0	0	0	0	0	0	0	0	0	0	0	0	0	0	0
BREX type III	0	0	0	0	0	0	0	0	0	0	0	0	0	0	0	0	0	0	0	0	0	0	0	0	0	0	0	0	0	0	0	0	0	0	0	0	0	0	0	0	0	0.362693	0	0	0	0	0	0	0
Borvo	12.9844	6.92665	16.9599	5.31951	17.748793329999998	6.41462	16.5703	4.5059	13.6421	4.21077	28.4916	5.22064	0	0.725441	0	1.62713	0	0	3.5525236000000002	0.9486745799999999	1.29393	14.6912	9.446604599999999	1.11038	4.01313	3.23503	1.70259	6.9838382999999995	7.346988400000001	8.944702099999999	1.28268	2.33067	5.59293	4.86052	3.02695	4.1890988700000005	4.10746	3.43079	4.78124	2.77324	2.97353	3.2978746699999997	4.63327	3.56068	2.89551	4.6097	6.91463	6.901718300000001	0.6169874399999999
BstA	0	0	0	0	0	0	0	0	0	0	0	0	0.591525	0.545553	2.9535	1.75446	1.08465	2.03124	0	0	0	0	0	0	0	0	0	0	0	0	0	0	1.21043	0	0	0	0	0	0	0	0	0	0	0	0	0	0	0	0
Bunzi	1.10711	0.553293	1.37127	0	1.8417	1.02542	1.58942	1.22967	0.960066	0.612409	1.44523	0	0	0.265427	0	0.420023	0	0	0	0	0	0	0	0	0	0	0	0.7578	0.672269	0.595075	0	0.80639	0	1.24846	1.04481	0	0	0	0	0	0	0	0	0	0	0	0.789347	0.699209	0
CARD-NLR-Phospho	0	0	0	0	0	0	0	0	0	0	0	0.425845	0.601681	1.25252	0.785315	0.511755	0	0	0	0	0.354651	0	0.325844	0	0	0.656335	0	0	0	0	0	0	0	0	0	0	0	0	0	0	0	0	0	0	0	0	0	0	0
CARD-NLR-like	0	0	0	0	0	0	0	0	0	0	0	0	0	0	0	0	0	0	0	0	0	0	0	0	0	0	0	0	0	0	0	0	0	0	0	0	0	0	0	0	0	0	0	0	0	0	0	0	0
CBASS type I	8.080403369999999	9.84794	8.33161	22.4284	14.3089	20.6072	18.556	10.8303	19.882	11.0668	14.1379	7.25865	46.4124	43.804	55.3185	41.4524	35.4831	32.4314	127.193	30.7695	38.2205	153.113	42.4034	58.0103	50.9174	71.9479	45.8492	42.6119	36.1668	30.5339	39.738108860000004	39.1772	60.7862	49.8139	28.0783	195.961	34.5848	45.9241	45.1278	61.6892	47.7733	44.4316	77.14627134999999	84.7729	87.6068	57.855	59.5963	44.9244	43.8309
CBASS type II	26.6797	21.575451649999998	26.1847	29.1328	23.2214	27.2536	26.4636	19.078	20.589	24.1252	29.4725	18.7794	63.4506	57.3324	95.2124	60.3553	47.9124	55.5512	149.006	47.6682	62.5312	60.799	37.9361	45.3552	23.439	45.5744	18.0593	29.0215	22.2924	10.0042	39.6674	44.8475	130.661	11.6906	12.5004	10.7278	24.5375	34.7108	32.0184	40.8828	40.436	50.7367	23.5975	28.5631	32.8015	18.4059	27.1843	13.4016	38.6025
CBASS type III	20.7796	20.701061250000002	16.876	11.8565	16.7024	13.2434	18.0837	13.7521	13.8327	14.8972	19.9485	11.6469	19.9698	29.3161	20.6245	19.4326	20.3144	17.7683	17.3373	15.1847	17.6578	23.3877	16.8941	10.446068200000001	20.4179	20.3568	12.2937	14.4551	14.3419	8.622722450000001	16.2878	23.4007	17.6729	23.3462	12.7597	16.3742	23.157	29.3686	27.5138	34.315	37.7348	42.218947469999996	15.3531	13.3649	19.9311	12.5162	13.0114	9.34492	28.882
CRISPR-Cas adaptation	5.00101	5.25669	7.00253	5.51354	8.62904	5.97116	8.89287	6.8552	5.55696	5.65265	6.432010200000001	4.61614	5.073255329999999	17.4594	2.33753	5.00811	3.8642155000000002	3.5534244299999997	0.485223	1.33474	2.11332	1.84508	3.0345	2.21932	1.8777437000000001	3.3901	0.844965	7.27893	9.684936109999999	8.090967899999999	4.83026	9.83964	1.09791	5.60005	4.9403966200000005	3.67744	2.76837	1.67659	6.17027	7.0126475600000004	6.911935499999999	10.5417	0.894325	0.659716	2.11305	5.86549	11.5521	8.987338900000001	6.90899
CRISPR-Cas type I	25.820908460000002	23.848247530000002	18.1874	17.9838	30.314243870000002	22.224932719999998	31.0761	24.7365	25.0836	30.9497	27.1597	26.4361	39.1849	36.7867	43.0444	34.062	30.7672	34.2441	9.817376040000001	21.7836	30.9858	23.491448639999998	41.071	30.0445	23.9509	29.139	22.1497	27.9526	19.2229	12.9703	35.2852	34.5554	31.8806	36.7978	48.8578	95.10594710000001	47.0829	46.2716	48.4118	46.8367	50.7703	46.97	14.7716	16.9081	21.324842750000002	17.333132380000002	20.404778280000002	14.68	31.2148
CRISPR-Cas type II	1.449	0	1.3573	0	0.77003	0	1.52309	0	0.63696	0	1.15887	1.00792	0	0	0	0	0	0	0	0	0	0	7.14809	0	0	0	0	0	0	0	0	0	0	0	0	0	0	0	0	0	0	0	0	0	0	0	0	0	0
CRISPR-Cas type III	5.39284	4.80271	5.11474	3.06153	6.34299	2.9812304999999997	4.42478	3.48341	3.4900568400000003	2.62516	13.5444	3.15874	2.91868	9.54431	1.77561	3.0678445500000002	1.66017	1.41622	0.469616	0.777434	1.28361	2.00323	0.914991	1.17308	1.28829	2.0484166800000003	1.81807	2.38492	2.84156	2.95529	0	2.69697	0.405512	2.73088	1.50641	1.4131864699999999	0	0.772875	1.66798	2.18468	1.59883	2.9630481900000003	0.584012	1.9618676300000002	2.39256	1.75564	3.9945320300000002	2.74822	1.84528
CRISPR-Cas type IV	8.99725	3.41677	4.29376	1.44151	5.43841	3.20379	5.94325	0.742546	2.37875	1.6598937299999998	5.81966	2.22879	0.522888	2.10138	1.33788	1.66983	1.81216	0	0	2.14962	2.67069	1.4961254099999999	0.7710714700000001	0	0	0	0	0	0	0	0	0	0	0	0	0	0	0	0	0	0	0.585554	0	0	0	0	0.268401	0	0.412634
CapRel	9.69807	15.411086699999998	13.2184	12.877005700000002	15.8765	14.724138700000001	13.083913800000001	20.028953299999998	20.1722	10.562346699999999	11.543420099999999	10.1024	2.41299	9.06759	4.4944	7.0228	7.23908	6.65855	0	0.469264	0	0	0	0	6.443858799999999	6.76032	4.38808	20.6386	24.5563	27.7287	9.00199	18.4788	8.30795	25.9795	19.2273	14.304704300000001	3.53876	5.57532	7.25579	12.4481	11.373	13.517062679999999	6.4063721000000005	5.75863	8.787335800000001	18.1953	31.892	27.2272	3.0582304000000002
Ceres	0	0	0	0	0	0	0	0	2.61867	0	0	0	0	0	0	0	0	0	0.516354	0.53211	0.72368	0.972887	0.710285	0.97305	2.78614	1.7043414700000001	1.06483	8.437308699999999	5.054740300000001	1.06557	0	0	0	0	0	0	1.5189	1.54643	1.42519	0.479807	0.793427	0.463916	1.14469	1.19841	1.08945	0.60432	0.239326	0	1.75236
Cernunnos	0	0	0	0	0	0	0	0	0	0	0	0	0	0	0	0	0	0	0	0	0	0.883501	8.606225929999999	0	0	0	0	0	0	0	0	0	0	0	0	0	0	0	0	0	0	0	0	0	0	0	0	0	0
CoCoNut I-A	5.2611300199999995	7.77458	5.5050031299999995	5.71395	7.8079941999999996	6.05254	5.98132	6.33776	6.0692030400000005	4.76307	4.13234	3.23558	5.560241769999999	8.5502	16.9273	6.8203790600000005	7.00035	7.83966	11.975	3.29927	1.88257	3.2642385000000003	2.91032	3.4226720000000004	7.094093539999999	7.20496	3.3377388000000003	7.0984	6.04055	4.51733	4.77019	8.22098	16.8319	10.2956	6.96968	4.92178	30.3575	35.747908599999995	25.3537	9.22237	9.49868	13.5038	7.69531	6.17147	6.9625349199999995	7.34542	8.783913290000001	5.62919	15.0959
CoCoNut I-B	0	0	0	0	0	0	0	0	0	0	0	0	0	0	0	0	0	0	0	0	0	0	0	0	0	0.262191	0	0.819846	0.90879	0	0	0	0	0	0	0	0	0	0	0	0	0	0	1.49795	0.497626	0.615199	2.08234	2.58413	0
CoCoNut I-C	0	0	0	0	0	1.09026	0.324892	3.65714	3.08588	2.55188	0	2.06082	8.71884	10.2721	12.5888	5.504607439999999	3.4062	3.8056486400000002	3.22272	2.6743505499999998	6.007014099999999	28.6409	3.79821	8.47193	2.1596528900000003	9.339821240000001	4.74607	4.0412	4.4241052100000005	1.9514	17.5368	16.332	34.8641	0.789063	0.688001	0.752179	11.891708099999999	14.1913	11.6311	10.3089	13.0386	6.95238	1.06459	3.21606	6.23861	4.07837	3.9460586500000003	2.3329	16.8049
CoCoNut II	0	1.52057	1.27008	0.788135	1.14316	0.62342	0.492357	0.816372	0.617852	0.965083	0	0	2.01199	1.46847	6.47682	2.09536	1.3215	8.45049	7.8184	2.62747	5.5079422000000005	7.45751	2.53671	3.18675	1.17552	1.01668	0.654504	1.45881	1.2693872800000001	0	0.9901	1.63582	5.41759	1.30413	0.549265	1.0635	1.6625473800000001	2.50972	2.14559	2.94268	3.84576	4.48056	0.962529	1.43722	1.4261727899999999	1.2103	1.2252368100000002	0.606152	3.8321407499999998
CoCoNut III-A	2.68665	1.10356	2.11352	1.14552	2.80319	0.801018	3.44056	1.3864	2.6144	1.39879	2.93512	0.799141	4.12107	3.54022	4.88069	3.18316	3.81047	2.85312	0	0	0.744965	0.740045	0.45416	0	8.76576	7.425811379999999	2.72083	1.44682	1.57956	0.690856	2.17944	1.76622	4.04511	2.0299	1.2170613399999999	0.987234	1.8459037100000002	1.33833	1.12606	6.31526	4.18213	3.17034	0.622779	0	1.1309272799999999	0.963298	1.59379	0	3.1058799599999998
DISARM type I	6.6676117999999995	2.20033	5.4743379999999995	2.3327429299999998	10.1462	3.82018	7.46432	1.18661	2.23914	2.36743	10.5399	2.30189	0.933287	0.790535	2.48283	0.548776	0	0.651212	0	0.432345	0	0	0.4299	0	0.546593	0.518693	0	0.55786	0.774164	0	0	0	0	0.840357	0	0	0	0	0	0.449479	0	0.377665	0.588083	0	0.444394	1.21812	0.562534	0.652251	0.416319
DRT class I	0	0	0	0	0	0	0	0	0	0	0	0	0	0	0	0	0	0	1.72403	1.37342	0	0	0	0	0	0	0	0	0	0	0	0	0	0	0	0	0	0	0	0	0	0	0	0	0	0	0	0	0
DRT class II	0	0	0	0	0	0.542331	0.404538	0.546296	3.23404	0	0	0	17.7281	10.8915	9.12979	8.42257	5.43315	5.88761	1.4448	1.7042418000000001	11.4705	22.9231	3.47386	6.29162	0	3.2564	0	2.0488	1.00947	0	6.64992	8.10264	7.27704	0	0	0	4.06006	11.3954	5.37287	6.61258	2.7799271599999997	1.56073	0	2.0044789200000004	2.9367121899999997	0.78536	0.458876	0	29.6161
DRT class III	1.76832	0	1.57945	0	1.68312	0	3.18596	0	2.90282	0	5.69711	0	0	0.728649	3.36493	0.704458	0	0	5.79091	0.637795	0	0	0	0	0	0.754897	0	1.3792026700000002	0.911588	0	0	0	2.86121	0	0	0	0	1.1299	0.657379	1.09618	0	1.67473	0.66397	0.975607	0.655541	1.52836	1.61379	1.15383	0
DRT type 2	10.6495	7.658169630000001	9.992866809999999	5.06651	11.389	10.0324	11.346	25.1611	43.8054	23.1593	13.3802	20.1001	125.624	83.59109828999999	87.14424082000001	69.5767	64.3046	47.937145550000004	38.3147	33.4706	67.2564	529.09	80.8562	183.713	10.9686	31.5501	9.607538219999999	36.345540559999996	39.6222	19.8197	63.131	68.3738	65.7698	13.5069	10.234801899999999	13.6789	37.3754	61.6454	31.4137	110.907	91.20588427999999	57.4108	7.96168	7.32527	12.7845	33.9713	23.4894	13.232415829999999	99.7482
DRT type 3	0	0	0	0	0	0	0	0	0	0	0	0	0	0	0	0	0	0	0	0.728607	15.4016	0	0	0	0	0	0	0	0	0	0	0	0	0	0	0	0	0	0	0	0	0	0	0	0	0	0	0	0
DRT type 4	0	0	0	0	0	0	0	0	0	0	0	0	0	0	0	0	0	0	1.72403	1.37342	0	0	0	0	0	0	0	0	0	0	0	0	0	0	0	0	0	0	0	0	0	0	0	0	0	0	0	0	0
DRT type 6	0	0	0	0	0	0	0	0	0	0	0	0	0	0	0	0	0	0	0	2.15614	0	0	0	0	0	0	0	0	0	0	0	0	0	0	0	0	0	0	0	0	0	0	0	0	0	0	0	0	0
DRT type 8	0.738922	0	5.18366	0	1.52193	0	0	0	0	0	0	0	0	0	0.623668	0	0	0	0.766318	22.7627	0.833581	0	0	0	0.589185	0	0	0	0	0	0	0	1.54102	0	0	0	0	0	0	0	0	0	0	0	0	0	0	0	0.69403
DRT type 9	0	0	0	0	0	0	0	0	0	0	0	0	4.58228	0.808878	1.66538	1.02472	1.40039	1.77875	0	0	0	0	0	0	0	2.04363	0.593005	0.648697	0	0	1.19807	1.60568	4.72135	0	0	0	0	1.67242	0.825781	0	0	0	0	0.75341	0.847465	0	0	0	4.86593
DS-1	2.2879	0.521065	3.34627	0	3.3897144200000002	0.607179	3.1824789599999996	0.517903	2.85642	0	2.29101	0	3.5918421300000003	4.78743	10.875202999999999	5.5638	2.51384	6.2195960999999995	59.421715080000006	4.54741	15.8105	2.2628	1.59257	0.908894	4.38223	2.4452458100000003	1.89771	3.37475	1.5952	0.520321	5.5339	5.031261730000001	12.8055	0	0.38622	0	3.7526157799999997	3.70289	4.60074	1.97512	1.69739	1.81608	2.50745	1.50082	1.74311	0.887246	1.89133	0.695968	3.1611713999999997
DS-10	0	0	0	0	0	0	0.217846	0	1.1087	0	0	0	0	0	0	0	0	0	0	0	0	0	0.680116	1.04701	0.357612	1.08534	0	0.876498	1.40657	0.62253	0	0	0	0	0	0	0	0	0	0	0.40679	0	0	0	0.737638	0.612167	0.289157	0	0.995094
DS-12B	0.99682	1.88139	0	9.64095	0.444701	3.78049	0.332294	0	0	2.7805655199999997	0	0	4.59158	2.2640204600000002	2.40019	1.60453	3.09075	2.0981	1.11911	6.55344	9.189233399999999	2.70757	2.62201	44.7321	9.36123	12.0121	8.56018	4.9171925100000005	1.9484128600000001	0	2.20752	0	0.995393	0.545258	1.20855	0	5.53232	5.57758	7.9575	3.20523	3.35529	3.10588	14.4354	18.6858	15.462334049999999	3.50624	4.8353832599999995	3.19869	1.5840630500000001
DS-14	0	0	0	0	0	0	0	0	0	0	0	0	0	0	0	0	0	0	0.892667	1.0047	1.31851	2.80375	2.33467	1.96678	0	0	0	0	0	0	0	0	0	0	0	0	0	0	0	0	0	0	0	0	0	0	0	0	0
DS-15	0	0	0	0	0	0	0	0	0	0	0	0	0	0	0	0	0	0	0	0	0	1.21931	0	0	0	0	0	0	0	0	0	0	0	0	0	0	0	0	0	0	0	0	0	0	0	0	0	0	0
DS-17	0	0	0	0	0	0	0.36854	0	3.75141	0	0	0	11.1029	10.4811	21.5871	8.62194	2.98654	7.43788	0	0	0	0	0.215571	0	0	3.76234	0	10.2386	7.025	3.2813	17.7045	16.7679	62.1941	2.4795333299999998	0.49281	0	2.96744	9.97456	6.743748060000001	9.60201	13.1398	15.0921	1.11024	3.9174769400000002	2.7118	10.9523	9.587924749999999	7.10467	2.70126
DS-18	0	0	0	0	0	0	0	0	0	0	0	0	6.5169	4.33032	5.66361	1.91258	2.75968	3.6319	0	0	0	0	0	0	0	1.17957	0	0	0	0	0	0.783381	0	0	0	0	0	0	0	2.63795	2.36237	1.61363	0	0	0.534585	0	0.674969	0	0.497777
DS-2	0.394508	0	1.09529	0.729926	1.48932	1.22774	1.01808	2.36617	0.708919	1.20153	0.935814	1.02606	0	2.06568	0	0.401118	0	0	0.426024	0.727695	1.16654	1.10184	1.38574	1.27171	0.532973	0.77875	0.865962	0.666085	0.787219	0.863203	0.98111	0.910322	0	0.931812	0.473048	0	0	0	0	0.762747	0.848243	0.560098	0	0.627248	0.709184	1.55285	0.942019	0.76408	1.36572
DS-20	0.8632128800000001	2.58328	1.2773085100000001	1.4875024799999998	0.790295	0.561625	0.851436	1.39705	2.05977	0.566989	0.472153	0	2.17138	1.89903	1.61959	1.26609	1.02977	1.04412	1.99824	4.23376	4.48665	14.915	8.25522	5.5314	3.6046	3.0437337600000003	3.54608	1.85093	2.53507	3.69114	0	0	0	0.559033	0.457236	0	0	1.25611	1.7085	2.52706	2.19885	3.00025	10.9558	7.47218	9.86558	2.49035	4.5835915599999995	2.57228	0.23933
DS-23	0.790219	0.596078	0	0.665046	0.722068	0.604965	1.07936	1.06643	1.3055	0	4.62997	0	1.66658	2.42386	0.337912	1.3317	1.50435	0.880811	0.936572	0.821429	0	0	7.66441	0	3.19667	5.63501	4.32587	2.15155	2.71739	1.34691	2.12454	1.43899	2.2336908600000003	2.38035	2.38744	1.8908116799999999	4.59711	6.02299	6.5674158799999995	3.00799	2.85899	1.99815	2.10276	5.05104	5.7163156200000005	1.7238	2.4213328300000003	1.64431	2.54474
DS-24	0	0	0	0	0	0	0.326366	0	0	0	0	0	0	0	0	0.469563	0	0	0	0	0	0	0	0	0	0	0	0	0	0	0	0	0	0	0	0	0	0	0	0	0	0	0	0	0	0	0	0	0
DS-27	0.417001	0	0	0	0	0	0.491459	0	0	0	0	0	0.883483	0.867389	1.04173	0.721947	1.16679	1.09292	1.6375	0.826375	0.936807	0.552287	1.83595	1.24414	0.472061	0.411516	0.739397	0	0	0	0	0	0	0	0.899878	0.601759	0	0	0	0.333039	0	0.292237	0	0	0	0	0	0	0.282974
DS-28	0	0	0	0	0	0	0	0	0	0	0	0	0	0.662081	0.520227	0	0	0	0.466464	0.888469	4.933	0	0.380847	0	0	0	0	0.522599	0	0	0	0	0	0	0	0	0	0	0	0.640911	0	0.379893	0	0	0	0.635559	0.587524	0	0
DS-29	0	0	4.20816	6.14404	0	1.19196	2.0262593200000003	1.33353	3.1549888999999998	1.22084	2.88383	0	10.7918	7.90791	8.92641	9.291386280000001	0	0	9.52339	12.6769	0	0	0.304855	0	2.2486303100000002	3.56927	2.36803	1.06381	0.525758	0	1.8665	4.56878	5.49971	0	0.801079	0	3.10112	4.19112	4.494135050000001	1.17359	4.67075	2.2499236700000003	2.13273	2.1237946599999997	2.34983	0	0.36331	0	8.05658
DS-31	0.347347	0	0	0	0	0	0	0	0	0	0	0	2.4502	2.83279	1.71139	1.5427764099999999	1.28318	0.972737	1.5784771100000001	1.52538	1.45491	12.0424	1.87908	3.66114	1.06345	1.2157	0	0	0	0	2.40411	1.53112	2.27158	0.576874	0	0.809331	2.11914	3.96438	2.7434355999999998	10.8076	7.43948	8.40701	0	0	0.57751	0	0	0	2.0029
DS-32	0.451002	0	0.718928	0	0.575809	0.75379	0.650956	0.645406	0	0.750745	0	1.08947	2.2586928200000003	3.39691	9.7365	1.6178883800000001	2.85687	2.2513584900000003	4.56414	3.80809	0.920773	0	0.312423	0	0	1.13542	0	0.389941	0.798299	0	0	0	1.23807	0.735862	0	0	4.26572	6.42466	5.56789	5.99716	7.36779	7.90163	0	0	0	0	1.1305053900000002	0	0.197959
DS-33	0	0.514254	0	0	0	0	0.52648	0	0.565462	0	0	0	2.27979	4.60093	3.79009	1.6469482700000002	1.5558176000000001	1.2499	0.412334	0	0	1.29046	0.634927	0	0	0.348585	0	0.611097	0.777929	0.48927	2.08437	2.6633059699999997	3.50144	2.24674	1.03602	0.602171	0	0.589752	0.493393	0.924811	0.599459	0.999634	0	0	0	0.894893	0.909037	0.768885	0.640601
DS-35	1.02214	0	0	0.664679	0	0.548941	0.67294	0	0	0.856916	0	0	0	0.887329	0	0.399193	0	0	0.486969	1.54323	1.28486	0	0.943875	0	0	0.37132	0	0.443563	0.432506	0	0	0	2.8464	0	0.727637	0	1.42531	1.13558	1.17776	1.26655	0.929294	1.29973	0	0	0	0	0.385817	0	0
DS-36	0	0	0	0	0	0	0	0	0	0	0	0	0	0.315862	0	0.535686	0.964681	0.854878	0	0	0	0	0	12.5011	0	0	0	0	0	0	0.596249	1.01425	3.90956	0	0	0	0	0	0	0	0	0.34146	0	0	0	0	0	0	0
DS-38	0	0	0	0	0	0	0	0	0.891778	0	0	0	0	0	0.398762	0.298029	0	0	0	0	0	0	0	0	0	0	0	6.22428	1.54512	1.12675	0	0	0	0	0	0	0	0	0	0	0	0	0	0	0	0	0.366601	0	0
DS-4	3.49609	2.96327	2.8537862599999997	5.7301	3.81666	2.56027	3.27183	2.21662	1.63427	3.24646	5.1309	1.32839	9.1986	11.0979	18.4813	14.0091	15.0208	14.5437	0	0	0.424247	0	0.590454	0	1.47876	1.1450432099999999	0	0	0.369726	0	0	0.719482	0	0	0	0	1.64639	3.47858	1.57771	3.40183	2.45929	2.9400895400000002	0.8594	0	1.17433	0	1.00854	0	0.622876
DS-41	0	0	0	0	0	0	0	0	0	0	0	0	0	0	0	0	0	0	0	2.91714	7.82642	0	0	0	0	0	0	0	0	0	0	0	0	0	0	0	0	0	0	0	0	0	0	0	0	0	0	0	0
DS-6	0.366054	2.6276412000000002	0.713184	1.02567	0.540377	0.749467	0.738328	1.41765	0.997537	2.8278605900000002	0	0	2.80254	2.30949	9.90344	2.2147	0.838232	3.98687	0.491756	0.454547	0	1.25735	1.22034	1.39735	0	0.856662	0	1.21323	1.11229	0.530521	3.04901	3.25	9.59382	0.526157	0	0	1.09609	1.4666	2.1947099000000003	2.72458	1.97635	3.18262	0.66083	0.989156	0.940375	1.96437	1.46853	1.07075	0.584447
DS-8	0.968968	2.36963	4.0731038999999996	2.41424	4.17282	2.21024	2.55449	0	1.55498	1.4891424100000001	2.6193128999999997	2.1088209300000003	1.7883745100000001	2.56231	0.605116	1.26378	1.62549	0	0.449298	1.60303	2.4041102800000003	2.84998	1.28529	0	0	0.397214	0	0.986493	0.711795	1.04635	1.27124	1.99954	0.529717	0	0.553892	0	1.2045	1.29549	1.1079	2.09012	2.3140385500000002	1.45325	0	1.50227	0.737897	1.89988	3.21054	2.16416	0.86959
DUF4238	0.520815	2.79234	0.72736	3.18135	1.30436	3.70747	0.952737	2.5454357300000003	5.46671	1.88707	0.505049	1.33346	0	1.08941	0	0.52559	0.555807	0.626609	0	0	0	0	0	0	13.7608	9.99122	8.77117	11.2253	6.97967	8.89962	1.04446	1.69775	0.799415	1.8529	1.29063	1.5601435700000001	1.40945	6.16003	6.07437	1.64404	2.01515	2.01381	14.5622	14.2684	13.3819	7.4604061999999995	7.68683	6.90764	0.71759
Damona	0	1.26799	0	0.844597	0	0.691465	1.59648	5.77152	7.1253	4.74447	0	8.136867689999999	13.4548	10.8613	7.4996293000000005	7.02608	6.52768	5.6337	5.73204	1.66897	4.75949	31.3771	2.42686	11.7233	1.68151	3.98291	1.5906410800000002	4.09402	4.36845	1.15237	17.4457	18.4959	16.4756	0.821452	0.547972	0	0	5.02462	2.53241	7.20438	5.69996	3.45664	0.810553	0.921599	2.11446	1.81105	2.2747286100000004	0.977909	8.285743309999999
DarTG	1.59087	2.7526605799999997	4.82221	3.60031	4.78853	4.3367	6.64044	4.54518	11.4323	3.2641910999999997	5.07543	2.94675	39.848953439999995	33.3341	59.4604	31.9313	25.0334	36.8516	15.799928399999999	12.5376	27.2423	102.814	16.1647	41.7831	3.06312	13.3208	4.30667	22.7121	19.7178	11.673068820000001	26.845	37.2438	64.2358	10.5339	8.68067	16.9779	19.7236	30.012644280000004	16.9562	22.4554	21.116766769999998	19.8789	3.12206	7.76782	8.26842	19.4079	14.4798	16.6048	25.757
Dazbog	0	0	0	0	0	0	0.385563	0	0	0	0	0	0	0.342005	0	0.700181	0.966116	0	2.52361	1.66519	0	0	0	0	0	0.342379	0	0	0.389801	0	0	0	0	0	1.21162	0	0	0	0	1.69942	0	0	0	0	0	0	0	0	0.373879
Detocs	2.09363	1.18324	3.07849	0	3.90578	0.434602	1.47087	2.52665	4.35655	0.850982	0.519371	0	5.16115	5.78854	13.525	5.79379	2.60152	2.81603	5.71083	5.77535	9.376814979999999	66.71896190000001	7.86685	18.709111280000002	5.79917	9.74632	4.4846109599999995	7.60985	6.63522	6.64922	1.83155	6.36906	25.911103360000002	6.022257199999999	4.21036	2.65202	0.872679	2.42913	2.2584	6.24857	4.97998	6.33025	9.86231	8.71259	11.3575	11.5889	13.0559	10.2695	3.98788
DndABCDE	0	0	0	0	0	0	0	0	0	0	0	0	0	0.452561	0	0	0	0	0	0	0	0	2.41241	0	0	0.340644	0	0	0	0	0	0	0	0	1.26012	0	0	0	0	0.491734	0	0.382801	0	0	0	0	0.374763	0	0.385671
DndFGH	0	0	0	0	0	0	0	0	1.71057	0	0	0	1.01453	1.33262	2.14902	1.82762	0	1.64402	0	0	0	0	0	0	0	0	0	4.86679	3.23244	0	0	0	1.33496	0	0	0	0	0	0	0	0	0	0	0	0	1.318	0.860161	0	0
Dodola	0	0	0	0	0	1.40996	0.998723	0.935387	1.14508	0.802513	0	0.997006	0.773393	0.908043	0.695196	0.710009	1.26197	0.91137	0.393695	0.673778	1.27111	0	2.74911	3.30877	1.34746	3.2383833600000003	1.9370044100000001	0.579495	0.74928	0.522304	0	0.701037	0.714913	0.789344	1.1799	1.15118	1.21802	0.9829	1.10608	0.913255	1.12445	0.831419	0.683914	0.862133	1.60434	0	1.1348	0	0.387625
Dpd	2.03707	0.70766	1.6872	0.679113	3.35221	0	3.08502	0	0.722553	0.563206	2.95414	1.3889	0	0.469369	1.00644	0.660048	0	0.722468	5.14689	0	0	0	0	0	1.37462	0.541547	0.639007	0.425102	0	0	1.4109	0.992196	4.57892	0.714935	0.521945	0	0	0	0.437601	0.531071	0	0.8249920300000001	1.22497	1.2778652400000001	0.71414	0.721687	0.607016	0	0.28807
Druantia type II	0	0	0	0	0	0	0.373652	0.732216	0.542628	0.9200079700000001	0	0	0	0.3998	0	0	0	0	0	0	0	0	0	0	0.481231	2.15876	1.19083	3.07563	0.85191	0.520321	0.706901	0	0.906705	0	0	0	1.96215	3.61686	2.78902	3.22349	5.205352899999999	2.19048	0	0	1.07417	0.484383	1.21257	0	2.8890889599999996
Druantia type III	1.20757	4.50637	0.636603	1.63965	1.10007	1.1514906599999999	3.8338343200000002	2.27589	7.50409	5.04607	1.29745	1.09422	14.0277	9.38085	20.4555	9.91492	7.15914	7.87844	7.45928	8.58798	4.23569	5.69187	4.93067	4.00941	5.8330752100000005	11.6829	5.58809	12.467164799999999	12.749286589999999	7.9525	11.1411	11.608446319999999	33.9439	9.49626	7.31638	5.13427	13.7478	19.0325	16.2869	15.1301	13.7517	18.8849	8.46844	10.6981	9.652207950000001	17.6364	13.3134	12.3368	19.1968
Druantia type IV	0	0	0	0	0	0	0	0	0	0	0	0	0	0	0	0	0	0	0	0	0	0	0	0	0	0	0	0	0	0	0	0	0	0	0	0	0	0	0	0	0	0	0	0	0	0	0	0	0
Dsr1	6.15224	4.18801	5.7878	3.83909	7.08511	4.73293	7.02484	4.7791	4.54941	4.5359491400000005	6.39825	1.926	0	0.430173	0	0.74111	0	0	3.2934	0.584181	0	0	0	0	0	0	0	0.554649	0.592079	0	0	0	0	0	0	0	0	0.804513	0.852548	0	0	0.499189	0	0	0	0	0.523342	0	0.387314
Dsr2	0	0.793606	0	0	0	3.35599	0	0	0	0	0	0.862309	0	0	2.53747	0	0	0	0	0	0	0	0	0	0	0	0	0	0	0	0	0	0	0	0	0	0	0	0	0	0	0	0	0	0	0	0	0	0
Dynamins	0	0	0	0	0	0	0	0	0	0	0	0	0	0	0	0	0	0	0	0	0	0	0	0	0	0	0	2.0079	0.685961	0	0	0	0	0	0	0	0	0	0	0	0	0	0	0	0	0	0	0	0
Eleos	1.27408	2.12187	2.38585	1.93694	2.46131	2.38191	1.77735	2.59653	2.91037	1.27581	2.02342	1.72917	2.20094	2.98134	5.41984	3.11928	2.76174	2.79421	1.24317	2.12358	3.7392543399999996	4.21105	5.30859	7.38263	1.68682	1.10149	0.961852	3.6758590599999996	4.01497	4.56973	3.41448	5.36403	11.7772	5.99531	3.88778	2.65	0	1.9323590300000002	2.8651149900000004	3.30498	2.77212	4.25903	1.54086	1.12314	1.51679	3.08605	4.94197	4.08388	1.87171
Erebus	0	0	0	0	0	0	0.494741	0	0	0	0	0	0	0	0	0	0	0	0	0	0	0	0	0	0	0	0	0	0	0	0	0	0	0	0	0	0	0	0	1.53817	1.69922	1.12694	0	0	0	0	0	0	0.460354
Esos	0	6.82919	0	1.1740185699999999	0	0.509226	3.9918630399999997	1.2408730700000001	4.6828932299999995	0.538485	0	0	26.0844	25.1239	83.6516	19.612999379999998	10.2121	32.2569	34.3874	6.03597	3.21564	14.2963	7.94461	8.51847	1.53154	6.88146	0.906008	12.3706	10.5829	4.7572	9.764678570000001	18.2317	39.3491	2.85189	7.19558	15.412278800000001	8.93814	12.898950169999999	9.70319	9.76076	11.833	14.7103	3.2365478899999998	6.71216	4.5091623400000005	20.7087	15.928110069999999	12.8164	2.70213
GAPS1	1.18331	3.4092833000000002	0	2.07755	0	1.7318043300000001	0.690774	0	0	0	0	0.648999	0	1.3527329799999999	0	0	0	0	1.98594	0.459714	0	0	0	0	7.62161	4.788716600000001	4.84724	0.326019	0.311825	0	0	0.780579	0.905633	0.768992	0	0.87931	3.56788	5.8838159999999995	7.70211	2.03576	1.6541034799999998	3.31336	7.96539	3.56006	5.98946	1.57343	1.4917	0.526422	2.7045801700000003
GAPS4	0	0	0	0	0	0	0.325957	0	0	0	0	0	1.99843	3.87643	1.64616	2.42002	2.73104	2.6669064000000002	0	0	0	0	0	0	0	0	0	0	0	0	3.38132	2.06045	1.54451	2.09701	3.16769	2.15335	0	0	0.47647	0.282269	0	0	0	0	0	0	0	0	0.880908
GAPS6	0	0.598687	0	1.97483	0	1.13597	1.4969899500000001	1.50368	1.79681	2.00197	0	0.585464	1.58113	3.7921989700000003	7.2376041099999995	1.52785	0	0.94425	6.13341	1.3862302199999998	0	0	0.423683	0	0.632049	1.42928	0	1.6123	1.54153	0.739246	4.64975	6.312401700000001	14.540524399999999	0	0.563664	0	1.11191	2.99144	2.2755	3.8084308700000005	3.13987	3.9260173800000002	0.704298	0.792083	0.635053	1.10495	2.31076	1.08427	1.58117
GIY-YIG	0	0	0	0	0	0	0	0	0	0	0	0	0	0	0	0	0	0	3.71699	1.08328	14.704	0	0	0	0	0	0	0	0	0	0	0	0	0	0	0	0	0	0	0	0	0	0	0	0	0	0	0	0
Gabija	48.1848	58.9643	51.3143	39.1093	50.567003979999996	46.2686	61.6592	37.6101	48.0282	46.4107	63.588210600000004	38.4533	121.59	126.111	287.758	119.215	100.802	121.658	290.504	95.4621	146.575	45.8585	52.2174	50.218	37.0106	43.8757	18.2588	68.0195	62.083647060000004	50.033345780000005	51.1225	68.9528	111.504	70.2777	49.6835	78.7876	63.5061	72.4373	69.9035	95.3003	88.3861	114.902	37.8253	39.2174	36.3065	55.0556	73.5694	58.481551089999996	51.6931
HEC-02	8.59452	7.04471	4.50503	2.05142	6.39358	11.375611639999999	5.5680400500000005	7.7278740500000005	4.48633	9.68885	7.571595670000001	6.07648	5.03074	11.2495	5.20868	4.87808	5.53878	5.99383	26.8817	8.01479	6.7213522800000005	14.0815	5.9906083500000005	6.50632	4.987206250000001	4.38811	2.85289	6.706288989999999	8.36502	6.886133859999999	13.167	12.7779	8.410999969999999	9.27838	2.4934517400000002	5.27132	5.524810410000001	6.19363	5.66347	10.9947	10.5745	11.9201	3.31727	2.25276	3.12368	6.654428879999999	8.41494	7.67168	10.5655
HEC-03	1.1004	9.138148099999999	1.45444	7.65117	1.37291	7.63401	12.7638	7.25328	16.470149199999998	6.3806096199999995	1.0991715100000001	3.14326	20.8583	17.6037	78.18172560000001	11.179226810000001	6.52116	11.4485	5.35064	4.25282	6.73664	42.251640019999996	6.46568	13.2975	3.44013	8.78032	2.34548	19.7731	20.8288	9.52367	1.13323	4.65989	13.3822	9.351387240000001	5.53132	5.70785	5.35797	12.6566	10.543201230000001	13.3118	21.6616	24.6014	8.85217	11.3595	9.28285	27.6996	27.398766379999998	19.1471	6.12295
HEC-04	0	0	0	0	0	0	0.337955	0	0	0	0	0	4.51933	3.8681956200000003	6.82382	2.2359145600000003	1.14776	1.7321412999999999	0.468662	0.317087	0.6433	2.7062	17.1993	1.35813	0	1.20659	0	1.5100395500000001	1.46741	0.780414	3.0463441700000002	4.46005	8.75745	0	0.553012	0	0.776803	0	0.478484	3.27027	2.76095	2.71775	0	1.32192	1.08595	0.932419	1.30642	0	9.26247
HEC-05	2.45999	2.33625	3.86979	7.66843	4.19231	7.9507	5.73142	6.4216111300000005	4.01921	7.48665	9.38012	4.34295	4.81771	13.4162	14.584250220000001	5.33897	3.13792	4.57069	0.553583	1.2421732699999999	6.39162	6.12833	3.2283205500000003	6.470689500000001	1.36365	4.69371	1.97518	5.40846	4.87002	5.23148	0.478912	3.75498	0	9.15621	4.9505782400000005	43.3636	2.65165	2.42131	4.26495	4.68987	2.77339	2.9984	2.31585	5.548355770000001	3.41861	8.78389	12.3258	8.42837	0.726728
HEC-06	9.3874	7.84598	6.76567	8.58558	8.70497	7.87109	9.26683	11.9892	13.484348709999999	11.3178	18.7449	8.40995	12.1867	15.7883	24.8419	13.445561529999999	5.21929	10.8454	28.1891	9.2856	15.343985009999999	38.585730070000004	17.3718	26.9603	12.6885	16.9884	6.7954538499999995	13.5924	12.5549	7.25528	13.2037	18.6267	36.398	29.0536	12.9047	172.164	13.5243	15.9703	18.2721	20.3066	16.0832	17.2964	15.038998020000001	14.4846	11.9642	14.281471419999999	14.995891409999999	10.305568019999999	19.0679
HEC-07	0.416048	0	2.60779	2.4132	3.1712	2.18443	1.6555	1.7381	0.686224	2.46258	1.68986	1.68969	0	1.3533886000000002	0	0.9315008899999999	0	0	0	0	0	0	0	0	0	0	0	0	0	0	0	0	0	0	0	0	0	0	0	0	0	0	0	0	0	0	0.281392	0	0
HEC-08	0	0	0	0	0	0	0.60572	0	1.14783	0	0	0	1.42393	1.36533	1.13961	3.03659	1.76786	1.95762	0	0	0	0	0	0	0	0	0	1.40854	1.22721	0.641091	0.499361	1.098	0.447893	3.31155	1.6976	1.55339	0	0	0	0	0	0.285742	0	0	0	0.99291	0.949168	0.967172	0
HNH	0.728368	0	3.80511	0	0	0	1.04794	0.704193	1.79907	0.861674	0	0	0.834304	1.4661979600000001	1.29219	1.09593	0	0	0.418814	13.8379	2.06382	0	0.880242	19.1387	1.2964	4.96188	4.02701	5.29212	2.94058	0.677318	0	0	0.593456	0	1.15889	0	1.39373	0	2.55966	2.66689	1.9313017399999999	2.72161	1.95068	0.756022	1.68658	0	1.0448847300000002	0	1.16548
Hachiman	15.42	29.1578	19.8335	17.9058	18.2697	20.604338040000002	18.344	21.3905	21.8112	18.2904	14.7907	13.267659290000001	14.6257	18.6382	38.6546	19.5975	12.2476	17.4533	8.99708	6.16892	8.59395	49.1473	10.8826	22.1028	19.5811	23.9048	13.8254	30.8343	27.6522	22.6013	12.1843	20.3408	29.3747	28.3282	17.2046	14.499	9.38523	15.2089	19.6404	18.652	18.3983	25.9775	16.5833	21.3287	20.0949	22.0774	31.3172	22.4192	9.710268600000001
Hachiman type I	4.71658	4.28296	6.5952	4.25112	6.21936	2.90028	5.43804	1.25208	1.84198	3.03313	5.579034500000001	3.82038	1.69272	6.56713	3.76414	2.23461	0.653909	2.45308	1.6223841300000001	3.2039347300000003	5.21585	5.3745419100000005	3.19725	3.5951310999999997	0.5833200000000001	1.1505551600000001	0	0.975047	0	0	0	0	1.01487	0.496561	0	0	0	0	0	1.53192	0	1.50757	0	0	0	0	0.734903	0	0.813738
Hachiman type II	0	0.448923	0	0	0	0	0	0	0	0	0	0	0	0.458634	0.431981	0	0	0	1.72542	1.71349	36.2394	0.478242	0.619626	0	1.44146	0.640373	0.752593	0.278249	0	0	0	0	0	1.13842	0.645139	0	0	0.682609	0.79951	0.86992	1.05969	1.65384	1.00141	0	0.725919	0.652054	0.237136	0	0.490709
Helicase-DUF2291	3.46328	1.75782	1.89057	7.95499	3.01517	7.60521	4.53773	6.31767	3.26091	8.4622	1.59061	2.12091	13.1683	8.73215	10.4656	7.2992	4.37027	4.49522	5.42862	4.9048566000000005	11.5291	34.5326	6.46357	11.759531500000001	8.39893	15.6912	9.97454	6.89849	7.40807	5.53607	4.94094	3.35847	6.72605	4.54653	3.95331	1.3658623799999998	13.7431	21.9365	17.0524	9.552764660000001	10.0681	8.63885	11.3082	11.8731	18.4052	7.52708	9.52252	5.73515	16.029821600000002
Her-DUF	0	1.85903	0	1.90183	0	5.16757	0	1.35438	1.33182	2.48425	0	2.16928	12.0266	8.18029	10.5679	8.7227	9.939518730000001	5.237169870000001	7.52449	10.0685	2.00468	2.45889	1.37832	3.0226363000000003	5.112797069999999	13.2099	5.53172	2.7093994599999998	3.18722	0.906619	3.73122	4.2454613000000005	6.49755	0.954244	1.69838	1.43296	9.8879	9.33994	9.8043	12.8252	10.4809	8.1106	6.1133	10.2831	11.549	3.9595101799999997	6.43531	4.22046	17.4646
Her-SIR	11.8971	9.81544	12.9499	6.9088	14.7981	9.73237	11.2444	5.6902	6.1420907499999995	9.114014300000001	11.4613	4.99118	31.3618	35.3602	30.9518	25.5699	26.8544	20.4889	54.642240789999995	11.4136	17.8294	31.9445	10.2041	16.9027	5.64875	10.674	1.41579	4.72729	3.40071	0.808364	8.247644189999999	11.3858	13.798467689999999	9.99003	7.16122	4.82117	3.28038	4.21713	5.223	16.1496	8.12212	13.851	2.46067	1.54741	2.6605154200000003	2.69637	6.5763	0	13.1412
Hhe	0.757372	0.80894	1.1927419700000002	0	0.664785	0.617099	0.847895	0.525979	2.76201	0.478611	0.936638	0.457388	11.91	7.30613	10.9438	5.79696	5.08842	4.06051	4.337281409999999	2.61292	9.68158	18.0189	6.22635	8.93177	1.53751	2.97587	1.07764	2.9078	3.94959	1.46849	4.31539	5.97523	10.6746	0.794403	0.955948	1.61737	2.5169733599999997	3.08613	1.91166	5.29117	5.28312	3.93532	0.651837	0.874748	1.55352	3.32754	2.49027	0.956654	4.46348
Hma	0.807395	0	0.798464	0	0	0.946224	0.662361	0.652575	0.932012	0.644183	1.2141	0	0	0.374267	0	0	0	0	0	0	0	0	0.561351	0	0	0.337627	0	0.971397	1.40699	1.38625	0	0	0	0	2.32147	0	0	0	0	0.333284	0.516309	1.6883136300000001	0	0	0	3.18474	1.42462	1.27722	0.9389327000000001
Hna	0	0	0.71592	0	0	0.881755	0	0	0	0	0	0	0	0	0	0	0	0	0	9.7431	0	0	0.264526	0	4.60411	3.70459	3.52558	0.760231	0.583638	0.895476	0	0	0	0	0.947052	0	3.1264906000000003	4.20914	3.24885	0	0	1.04208	3.7272	4.00469	4.34168	1.5928183900000001	1.12483	1.6704298400000002	1.20882
Hok/Sok	0	0	0	0	0	0	0.8229759699999999	0	0.53507	0.384143	0	0	6.19303	4.44984	4.89485	10.6126	11.0635	11.149915649999999	3.40157	6.25719	10.1782	21.8669	38.3001	59.6589	0	0	0	6.56357	2.3333537399999997	0.658144	0	0	0	2.05537	2.50132	1.2277	0	0	0	8.14082	4.36847	6.18695	2.08525	0	0.36854	2.14549	3.27373	0	0.535103
Hydrolase-TM	0	0	0	0	0.50225	0	0	0	0	0	0	0	0	0	0	0	0	0	0	0	0	0	0	0	0	0	0	0	0	0	0	0	0	0	0	0	0	0	0	0	0	0	0	0	0	0	0	0	0
Hypnos	0	0.555653	0	0	0.361561	0.445214	0.446913	1.6607779799999998	0.74014	0.769381	0	0.875645	2.05005	1.6656	9.82346	2.20193	1.66028	4.5094	1.4406	0.738592	0	0	0	0	0	2.43372	0.461427	1.31678	1.04778	0.751251	1.3979	1.20906	4.99334	0	0	0	1.38111	0.808515	2.2471549399999997	1.87812	1.7149	1.48901	0	0.773987	1.05394	1.77299	1.22131	1.38522	1.10219
ISG15-like	0	0	0	0	0	0	0.269801	0	0	0	0	0	0	0	0	0	0	0	0	0	0	0	0	0	0	0	0	0	0	0	0	0	0	0	0	0	0	0	0	0	0	0	0	0	0	0	0	0	0
IetAS	18.394090849999998	19.772578460000002	18.6137	12.9469	21.7198	15.2047	20.1762	11.5742	15.1677	15.5409	19.139	17.3327	22.3609	27.9214	12.4528	19.3755	21.3661	16.7468	11.712874849999999	13.1259	15.5682	50.84094661999999	23.9057	189.595	10.8584	12.561686589999999	8.3953	16.0044	15.6746	16.3391	13.428409669999999	17.3781	12.593	23.2132	19.3544	12.4428	2.92808	4.24301	5.62651	12.8794	7.41573	14.5188	15.8687	16.7974	19.7484	14.0382	21.3223	13.703464050000001	8.96608
JukAB	0	0	0	0.538763	0	1.57012	0	0	0	0	0	0	0	1.72752	1.65745	0	0	0	5.76414	0.377101	0	0	0	0	0.375988	1.09119	0	0	0	0	5.75722	4.88925	13.4181	0	0	0	3.4286687000000002	0	0.86454	3.53547	4.30336	2.59774	0	0.772483	0	0	0.625175	0	3.3914967000000003
Kiwa	2.43694	5.52005	1.46626	3.03923	3.36576	3.6601057100000003	3.72812	7.69733	7.16678	6.080943019999999	1.60817	4.83527	9.67755	11.448925580000001	14.8535	11.5577	8.05158	4.97882	12.517	8.253005170000002	7.16858	22.2096	4.79761	14.3174	5.68876	9.14819	1.74328	8.08522	12.0011	5.0941352900000005	5.2759380799999995	4.65085	11.5826	5.81897	4.442476940000001	2.5855893500000002	4.42294	9.512062799999999	5.55114	9.18523	7.35276	9.12233	3.76609	3.12812	4.93424	7.37674	9.64466	5.03145	21.430207969999998
Lamassu Cap4-nuclease	8.70428	6.9654188900000005	4.20683	4.79481	5.2558012000000005	5.32067	7.30158	7.53452	9.7149	5.71753	4.8717	3.72432	7.73497	9.12664	23.6921	10.2721	9.14252	9.13943	2.9229	4.84166	20.4143	5.153954199999999	7.3083	11.088063899999998	5.57355	5.6800058700000005	2.7814	10.174053220000001	11.5105	10.7805	6.20935	9.58069	19.5147	13.6083	9.02587	7.48058	5.17807	7.83662	10.8965	11.5232	13.9991	16.814	4.52123	3.93366	6.525865570000001	10.3859	14.850914509999999	10.463	8.70839
Lamassu DS-30	1.04906	2.37596	1.26025	0.893914	1.01644	2.23086	1.37944	2.31275	2.68393	1.9272967799999998	0	1.03994	0	0.404807	0	0.600546	0	0	31.7136	2.09456	1.1048	0	0	0	0.589168	0.508131	0	3.0744173000000004	3.11643	4.02141	1.19465	0	1.43421	3.27286	1.86169	0	0	0	0.893102	1.40918	1.93285	1.9508260800000001	0	0	0.975494	2.73309	4.78275	3.63373	0
Lamassu FMO	1.02886	1.18201	0	0	0	0	0.734941	0	0	0	0	0	7.5169463499999996	8.56887	8.83411	6.89963	6.749323889999999	5.1255	1.97123	4.89109	6.8925994699999995	3.94495	4.54298	2.87245	6.1436	3.94503	3.09335	0.871968	0.878991	0.785752	4.22587	6.133	4.80903	5.77994	3.26737	3.30493	12.263295600000001	18.285437899999998	20.3161	18.0292	20.9621	28.3172	3.88351	1.96345	2.97602	1.06149	1.09153	0	7.17286
Lamassu Hydrolase-Protease	0.420632	0	0	0	0	0	0.88733	0	0.659402	0.637646	0	0	0.633962	0	0	0.469359	0	0	0	2.35022	5.99308	0	4.46662	0	2.96907	2.78968	1.66028	0.666158	0.762791	0.607682	0	0	0	0.511368	1.35159	0.743051	0.835822	0.642112	1.12152	1.38613	0.934059	0.517081	2.34848	3.0402	3.92153	1.14949	1.45383	1.25454	0.441528
Lamassu Lipase	0	0	0.435916	0	0	0	0	0	0	0	0	0	0	0	0	0	0	0	0	0	0	0	0	0	0.374875	0.563892	0	0	0	0	0	0	0	0	0	0	0	0	0	0	0	0	0	0	0	0	0	0	0
Lamassu Mrr	1.52414	1.67193	1.00321	0	2.19792	1.0717	2.00128	1.30659	1.44378	2.16381	2.76915	1.03263	1.5582254899999999	1.33294	1.5819336800000001	1.14443	1.00887	1.11717	34.3014	2.5714	6.83907	61.0986	4.61489	17.3041	0	0.524298	0	0.455182	0	0	0	0	1.94155	0	0	0	1.71157	1.11626	0.9823	4.04898	2.58717	1.74359	0	0	0	0	0.734585	0	1.6034773900000001
Lamassu PDDEXK	0	0	0	0	0	0	0	0	0	0	0	0	0	0	0	0	0	0	0	0	0	0	0	0	2.37	1.86339	0	0	0	0	0	0	0	0	0	0	0	0	0	0	0	0	0.83293	0	0.510557	0	0	0	1.07164
Lamassu Protease	0.564982	0.73959	0	0.724532	0.751693	0.640769	1.01347	0.645454	0.614561	0.891428	0	0.723254	0	0.574985	0.542833	0.44619	0.624711	0	0	0	0.537589	0	0.417339	0.716813	0	0.326259	1.11659	0.484059	0.581662	0	0	0	0	0.612764	1.01389	0.529575	0	0	0.669782	0.43325	0.775917	0.390124	0	0	0	0	0.412535	0	0
Lamassu family	1.3372	0.697997	0.96245	2.2564	2.2074	2.76096	2.3543206999999997	1.99437	0.627165	3.02854	3.4134	1.34766	0.5268	0.591219	0.578846	0.522763	0.474841	0	0	0.483612	0.763953	0	0	0	0.585944	0.740628	0	0	0.346261	0	0	0.553879	0.54076	0	0	0	1.28057	1.76562	1.97094	2.407	2.55186	3.3584	0	0	0	0	0.240242	0	0.573068
Lit	3.9406	6.23435	2.6562652399999997	11.953826339999999	2.93302	4.53375	3.5264150400000003	6.10173	5.40612	8.22637	1.60958	5.3926193300000005	5.54085	5.4370549200000005	2.4667	5.41796	5.87925	4.334446440000001	5.32285	5.49079	5.237856750000001	1.07261	3.06082	3.0419197000000002	8.1958	8.34873	6.596612309999999	7.82686	8.93842	8.184709980000001	7.7253734000000005	3.97057	3.1702842199999997	10.311893229999999	9.61516	7.11809	4.2531	4.68781	7.31008	5.36976	5.14198	7.47686	7.1227651000000005	6.00264	10.0684	6.34799	10.8319	7.444140620000001	3.1327
MADS	0.907951	1.01124	1.08761	1.90178	0.898042	1.44507	1.46842	1.35537	1.07322	1.09396	1.89961	0.823533	0	0.413245	0	0	0	0	0	0	0	0.494551	0	0	0	0	0	0	0	0	0	0	0	0	0	0	0	0	0	0	0	0	0	0	0	0	0.295931	0	0
MADS3-4	0	0.521065	0.622685	0	0.542365	0.607179	0.709103	0.517903	0.788983	0	0	0	2.73749	1.97951	7.17831	3.39999	1.97466	2.83964	0	0	0	0.649235	0.634216	0.908894	0	0.35528	0	0.652965	0.743289	0	3.64162	3.01354	9.27637	0	0.38622	0	0	0.592228	0.48743	0.535145	0.850359	0.568773	0	0	0	0.887246	0.849118	0.695968	0.41273
MazEF	237.324	155.204	44.253	60.1016	58.3664	49.9142	123.324	103.085	104.21156490999999	99.68335289000001	56.462316099999995	104.712	108.279	82.0751	101.247	87.0802	101.68	104.997	53.1939	135.957	147.413	396.001	144.068	207.178	72.9877	60.8434	68.9501	77.2652	84.1753	73.429	56.5628	42.633999349999996	46.0678	72.71860367000001	52.9166	45.0937	121.145	114.97	108.037	136.893	135.24	111.442	83.0822	50.5013	58.3078	45.9135	60.6456	48.6246	74.9962
Menshen	1.3217969900000002	0.58077	1.08657	0.922106	1.77278	0	3.35342	0	6.1896	0.953325	3.80459	0	6.47176	4.5967	4.33622	3.27945	2.7955912400000003	1.18285	1.84339	1.3436152000000001	1.4864881300000001	1.61661	2.16356	0	1.19514	2.32229	0	2.97164	3.10949	0.40379	1.68741	4.05307	2.63988	1.35385	0	0	3.88733	5.38836	4.37505	6.3649089199999995	4.83334	6.59008	0	0	0.322774	0.621612	0.611705	0	3.9999201099999997
Mokosh type I	0.330876	5.5624762400000005	0	1.6094385500000001	0	2.71896	3.91522	3.94545	5.81866	4.21536	0	3.45764	49.3547	36.9252	58.7801	43.4479	39.9921	34.326411310000005	36.562	16.7566	15.2382	78.82095222000001	30.8844	42.568	13.4246	18.0929	7.502759940000001	16.5504	13.765892730000001	1.5774404499999999	13.356656000000001	18.9779	40.2785	7.02836	4.9211716800000005	0.701228	44.7774	56.1186	42.3551	24.4227	25.027	27.9359	12.2866	12.1476	14.9492	15.255335279999999	16.658	10.1742	27.494
Mokosh type II	12.6252	11.665	26.0656	7.62595	13.208242219999999	6.1065	7.61284	8.00392	7.2256133899999995	7.18815	5.65742	6.26348	9.01282	9.56859	8.62072	10.873069600000001	16.4113	13.9455	7.59957	15.512988159999999	19.5821	12.8457	15.5112	11.777240800000001	16.6732	13.3503	9.72443	7.78419	5.8704730000000005	5.79978	10.655766960000001	9.673751970000001	20.196	8.53307	11.664290000000001	28.6321	11.7466	8.37366	12.396	12.3096	12.8096	14.0577	8.02619	8.10931	6.42216	4.6525878899999995	8.25202	4.49454	14.4365
MqsRAC	16.1371	8.36219	12.7365	1.84822	15.967153139999999	5.58851	11.5396	11.045601699999999	25.1301	8.67788	15.2618	8.093369880000001	46.5869	38.4374	33.9849	24.168986429999997	22.017	17.8254	1.4903455300000001	1.1716	2.47356	15.0374	2.42647	0.938537	7.04956	18.3994	0.845855	21.4747	24.561	11.517790309999999	42.8669	51.1606	44.821531719999996	0.509524	0.799744	0	18.868	39.5535	19.1708	55.260397209999994	43.8341	25.527515779999998	4.53593	3.03049	4.00222	17.1586	15.6127	7.28605	45.2751
Mza	2.91265	2.5905	2.64534	4.43424	2.47165	4.0901952999999995	3.6696063700000003	2.96189	2.0905151899999996	4.69978	3.5510330000000003	2.70958	1.84625	2.80239	1.71191	2.62574	2.34867	3.9731	2.0633771899999998	2.06193	3.4378580999999997	1.21902	8.97912	1.34753	0.437858	0.650872	0	1.42718	1.2768	1.66967	2.40646	2.86472	2.62037	3.41845	3.30286	2.04206	0	0	0	1.71516	1.09557	2.00979	0	0	0.388226	1.2392094299999998	1.49454	0.759765	3.39058
NLR_like	0	0.627244	0	0	0.642109	0	3.06322	1.93749	1.86491	2.78021	1.48668	1.29135	19.4668	11.741	19.7687	14.299617439999999	9.21272	7.62504	2.50697	2.95339	6.55346	42.3742	5.8233861000000005	13.7115	1.41877	3.29865	0	2.45822	2.77014	1.65245	3.02416	3.44869	2.86491	1.5248091700000002	0.78719	1.15556	1.23804	2.78634	2.37071	14.711816200000001	12.450289900000001	8.15397	0.441644	0	0.921089	2.13996	1.99374	1.53962	4.162854530000001
Nantosuelta	0	0	0	0	0	0	0	0	0	0	0	0	0	0	0	0	1.30533	0	0	0	0	2.95371	0.596313	1.88446	0	0	0	0	0	0	0	0	0	0	0	0	0	0	0	0	0	0	0	0	0	0	0	0	0
Ogmios	0	0	0	0	0	0	0	0	0	0	0	0	0	0	0	0.472373	0	0.701773	0	0	0.913509	0	1.77511	11.5352	0	0	0	0	0	0	0	0	0	0	0	0	0	0	0.596661	0.373588	0	0.507899	0	0	0	0	0	0	0
Old	0	0	0	0	0	0	0	0	0	0	0	0	0	0	0	0	0	0	1.9956	0.403181	0	0	0	0	0.429859	0.257703	0	0	0	0	0	0	2.33795	0	0	0	0	0	0	0	0	0	0.575374	1.14033	0	0	0	0	0
Olokun	1.30664	1.53023	1.32521	4.95008	0.712109	1.10525	1.9220330799999998	0	0.476848	2.90438	0.967671	0.855465	1.7146079200000002	4.4316	7.15596	3.92583	1.97128	4.8606839100000006	8.90617	5.99431	2.57821	5.23373	12.372687119999998	20.6422	5.544	5.23906	3.56529	5.27713	2.93368	1.50952	5.08983	4.00844	12.9675	2.25465	0.808462	4.09338	2.6033	4.9728	3.24595	4.60792	3.80704	4.48486	6.3564	6.93738	8.01692	3.11616	4.4312	1.93911	5.83101
PARIS type I	0.665113	0.604308	0	0	0.554807	0	2.4257201000000004	1.02537	0.990705	3.02468	1.3962665900000002	1.45877	5.3892156700000005	8.33096	2.4943439499999998	4.4552407800000005	1.4226812899999999	3.73744	12.4491	12.4829	16.2417	129.534	47.2114	53.6804	0.469344	3.35575	2.46319	1.97797	2.6567	1.42126	8.165259200000001	7.84389	18.3206	2.7013605099999998	3.60649	1.90427	2.40768	2.56173	3.60877	7.347991759999999	5.18262	5.01802	0	1.5402898299999999	1.97899	1.03357	1.9429	0.547824	13.1972
PARIS type II	8.16302	7.601232700000001	3.30335	5.14273	4.64038	4.01642	9.12634	9.13159	8.47639	9.42326	3.1680394400000003	9.24454	22.8492	16.5414	19.4702	16.7613	12.5189	14.873197560000001	2.39935	7.8292617799999995	4.75477	1.23219	28.6432	12.9854	6.09611	9.70521	10.449	12.3317	13.4861	7.1713349399999995	26.7386	12.3798	17.627464810000003	16.0614	31.155513210000002	35.844	11.4162	10.3509	7.64561	12.8409	10.6999	13.796	4.68714	10.431	12.278040129999999	8.41275	10.4451	8.649792680000001	17.0432
PD-Lambda-1	0.392161	0	0	0	0	1.47515	0.427423	3.2166374500000003	3.5500556100000003	3.47469	0	2.12042	6.62604	6.8661864999999995	3.1606645999999996	4.3559731500000005	5.0703	1.3682	0	0	0	0	0	0	6.45202	8.25418	1.6512	2.76345	3.78297	1.35492	8.603677600000001	10.5951	3.71013	0	0	0	4.0594947999999995	6.18917	5.557019110000001	2.01496	1.3236270700000001	0.485006	0.686118	0.756736	1.67503	1.43348	0.450135	0	7.39617
PD-Lambda-2	0	0	1.64943	0	0.655121	0.763537	0	0.920261	1.33463	1.02572	0	0	0	0.563231	0	0	0	0	38.1547	3.61603	0.971892	1.25393	1.14846	0.889304	1.3598	4.20623	2.06961	1.42233	2.10677	1.97035	0	1.0964	2.42703	0.987761	0.525947	0.706774	2.58191	2.67284	2.75491	0.440467	0	0	0.862649	1.40728	2.3358	2.7298311799999997	2.07235	1.38231	3.0371556999999996
PD-Lambda-3	2.0516	1.66122	0	0.741372	0.695164	0.749328	1.4538984400000001	1.01899	1.1650286699999999	0.981248	3.45565	1.01082	0	0.993299	0.413358	0.751983	0	0.73813	0.476099	0.592101	0	0	0	0	0.902647	0.540505	0	0.452239	0.568728	0.667329	0	0.680606	0	1.11468	0.628758	0.666934	0	0.435651	1.16184	3.0570366000000004	1.85901	3.53534	0	0	0.351142	0.78332	0.679069	0	0.526334
PD-Lambda-5	3.53124	4.0090623999999995	3.69009	2.00711	4.15699	2.80206	2.2418710600000002	1.4088044100000001	2.05282	2.18811	3.15917	3.20084	0	1.8677345399999998	0.395685	1.34831	0.54682	0	0	3.98095	8.95332	0.453706	1.18208	0	2.92555	1.7720903799999999	0.602222	1.53211	1.6323646699999999	0.9814070100000001	0	0	0	0	0	0	0	0	0.495794	2.96283	3.31307	3.25663	1.12223	0.607836	0.524302	0	1.35911	0	0.363837
PD-T4-2	0	0	0	0	0	0	0	0	0	0	0	0	0	0	0	0.403773	0	0	0	0	0	0	0.381263	0	0	0	0	0	0	0	0	0	0	0	1.13589	0	0	0	0	0	0.535316	0.998373	0	0	0	0	0	0	0.387999
PD-T4-3	0	0	0	0	0	0	0	0	0	0	0	0	0.685501	1.53111	0.808543	0.487428	1.23521	0.794405	5.35572	0.440457	0.565112	4.85547	2.49193	7.59093	0	0	0	1.01057	0.694908	0	0.585693	1.6669554500000001	4.02014	0.495882	0.447541	0	0	0	0	0.505707	0	1.06909	0.751369	0	0	0	0.403354	0	0.499001
PD-T4-4	0.488134	4.8921	1.81245	4.8076474000000005	4.06754	4.4346212000000005	3.49017	3.81075	3.10202	4.40576	7.56141	2.44658	3.96423	6.79871	4.792246029999999	5.60876	24.0158	2.6095	0.982717	0	0	13.425913999999999	9.31658	29.4519	0	1.84077	0	1.41187	0.918087	1.104	3.7763275999999997	2.58316	1.24633	0	0.523796	0	2.20346	3.94286	2.38082	4.08658	0	0.985397	2.90407	1.59704	2.8309216800000003	0	2.70582	0.85879	2.7058
PD-T4-5	6.75969	2.48164	11.3539	3.42673	11.5071	2.15606	7.92303	1.679	13.2592	0.74556	9.73547	0	21.1409	28.4981	59.484152439999995	32.6426	31.0311	34.3318	9.4931	11.698382550000002	25.7881	27.603514699999998	15.153	24.2402	0.581073	21.1172	4.23338	7.9927608800000005	6.1244692700000005	0.762726	17.9337	18.0915	36.6255	3.1133296599999998	2.25842	8.81455	11.1622	14.79	13.0512	21.0908	13.0917	13.102614710000001	4.8056	4.7790526700000004	5.74673	6.32689	11.1116	4.87825	21.1538
PD-T4-6	2.9613	6.036371900000001	7.06155	2.58131	3.5593003700000003	2.28644	3.07098	0.738825	1.6786002999999998	1.8749158000000001	2.539	1.56224	5.47401	11.3968	5.89123	3.4240583599999996	1.80624	1.3553	204.493	30.6759	4.73575	5.13408	1.7619896099999999	1.09161	4.70023	4.69657	4.75693	3.42087	0.926371	0	7.04259	6.91501	14.971324930000002	1.19336	0.8951327600000001	0.536853	5.23256	4.43948	5.04398	6.08239	5.92135	6.20993	4.53373	4.63216	2.5173	0.519559	2.0535659600000002	0	3.7101678099999997
PD-T4-7	0	0.684286	0.662368	0	0	0	0	0	0	0	0	0	0	0.271604	0	0	0	0	7.719458400000001	1.0877438000000001	0.590323	0	0	0	1.55994	3.75832	1.1828363199999998	0	0	0	0	0	2.34709	0	0	0	1.866	2.5541	4.10623	0.216541	0	0	1.6367	4.5289198100000005	4.86862	0	0.382059	0	12.4404
PD-T4-8	0	0	1.49964	1.8426614799999999	0	0.585704	0	0	0	0	0	0	0	0	0	0	0	0	0	1.19262	2.91302	0	0	0	4.9159869899999995	3.75497	1.24505	0	0	0	0	0	0	0	0	0	0	0.630226	0.549999	0.397179	0	0.311522	2.01836	2.93022	1.76018	0	0.347832	0	0.30777
PD-T4-9	0	0	0	0	0.529032	0.782172	1.35152	10.0808	7.131460130000001	7.99856	1.78483	2.69358	7.667014780000001	6.64051	4.8145791099999995	10.7331	5.7978190000000005	4.7992	5.92597	5.97339	9.73578	33.147161999999994	6.78918	20.0128	1.6556	7.80506	3.07818	4.9875	6.320005200000001	2.7976578500000002	6.30524	5.10586	6.47638	0.914876	0.719832	2.08455	9.40415	12.0249	7.955306599999999	5.96472	6.937437559999999	4.04377	2.32573	5.2512953499999995	8.42479	1.70048	1.35321	0	11.6125
PD-T7-1	0	0	0	0	0	0	0	0	0	0	0	0	0.753925	1.54464	0.580332	2.25724	0	0.613002	10.9924	5.38399	1.4242669000000001	0.867366	1.01135	0	0	0	0	0.639119	0	0.653248	0.691691	0.527444	5.6309	0.526398	0	2.04053	1.26964	0	0.368378	1.56109	0	0.291161	0.590761	0	0	0	0	0	0.279195
PD-T7-3	0	0	0	0	0	0	0	0	0	0	0	0	0	0.615284	0	0	0	0	0	0	0	0	0	0	0	0.316437	0	0	0	0	6.29311	1.91788	0	0	0	0	0	0	0	0	0	0	0	0	0	0	0	0	1.77459
PD-T7-4	0	1.20057	0	0.689512	0	0.479127	0	1.14949	0.576977	0	0	0	2.3626	2.81646	10.123692759999999	1.6885	0.855742	2.9781090299999997	0	0	0	0.78201	0.984123	0	2.5252847000000003	2.9026308199999997	1.96255	2.99642	3.45446	2.49637	0.655505	1.55993	6.364502399999999	4.32488	2.96461	1.48939	0.582719	1.15971	3.54351	2.15039	1.7066131700000002	3.79573	2.85336	3.0135	3.92393	2.43246	4.09201	2.01511	2.24423
PD-T7-5	0	0	0	0	0	0	0	0.95888	0.48563	0.672394	0	0.526914	0	0.432222	0.405009	0.687191	0	0	0	0	0.531386	0	0	0	0.927478	0.850579	0.746207	0.651924	0.643486	0.66453	0	0	0	1.69474	0.917715	0.721063	0.68444	0.882741	1.16105	0.488015	0.565281	0.524679	0.964541	1.47253	1.50303	0.625089	1.14158	0.558554	0
Panchino gp28	0	0	0	0	0	0	0	0	0	0	0	0	0	0	0	0	0	0	0	0	0	0	0	0	0	0	0	0	0	0	0	0	0	0	0	0	0	0	0	0	0	0	0	0	0	0	0	0	0
PbeABCD	0	0.520574	0	0	0	0	0.285974	0	0	0	0	0	1.30292	3.1388	1.48211	1.92139	1.3005833299999998	1.39958	0	0	0	0	2.41241	0	0	0.340644	0	0	0	0	0	0	0	0	1.26012	0	0	0	0	0.756949	0	0.579027	0	0	0	0	0.374763	0	0.385671
PfiAT	4.60529	7.1830216799999995	5.9348617699999995	6.15715	5.65774	5.11241	4.21765	8.29704	5.40887	6.142982229999999	5.9683861799999995	5.40549	0.473649	1.59343	1.4612134700000001	0.845504	0.679527	0	5.5384512500000005	1.71066	23.198	0	0	0	10.129797920000001	17.601	6.528969330000001	15.9693	12.015909500000001	11.892331330000001	0.885894	2.00357	1.25523	11.076701700000001	6.99929	20.3612	2.51158	3.16694	5.60892	7.74988	5.248460120000001	5.49005	5.13816	14.5257	6.975687539999999	11.0441	13.9261	12.4734	1.2644903699999999
PifAC	0	0	0	0	0	0	0	0	0	0	0	0	0	0	0	0	4.74267	0	0	0	2.11062	1.13883	0	0	0	0	0	0	0	0	0	0	0	0	0	0	0	0	0	0	0	0	0	0	0	0	0	0	0
Ppl	1.85946	1.6892	1.92927	0	1.98777	0.617401	1.17431	0	1.27118	0.613155	1.32383	0	2.67313	2.8551	9.172890579999999	1.78125	0.630224	1.79728	1.29017	0.971668	0.904554	5.78569	1.15448	1.42689	0	0.30233	0	0.770347	0.574934	0	1.70951	2.64832	4.86343	0.603452	0	0	0.762495	1.03517	0	2.08924	1.1982416900000001	2.09863	0	0	0	0.489811	1.3188675300000001	0.6658	1.78451
Prometheus	13.175528320000002	11.2965	9.83384	14.8864	6.75886	7.26366	11.3809	4.548067769999999	10.6222	5.38917	12.962134639999999	6.71998	17.2636	13.0573	15.9692	11.711624579999999	14.7792	13.228482300000001	10.9658	12.9912	9.913550599999999	27.0067	8.9936	17.196255700000002	20.43	20.8232	17.308613779999998	12.7121	10.8293	7.03711	16.636	16.4359	36.153910780000004	2.24425	2.31042	2.02775	10.9447	12.9273	12.0326	12.5369	13.0211	13.0042	36.6946	33.4087	32.2428	15.3208	16.2163	8.54799	26.0287
PrrC	4.98846	16.483113669999998	6.114429100000001	11.3483	6.53379	12.6614	7.28211	10.8459	12.0503	5.783886069999999	4.59344	5.81458	13.6986	16.0114	39.9464	18.7165	12.5579	18.6878	7.10034	5.37017	8.236	13.3192	7.1245420799999994	12.0917	9.632793620000001	21.3254	13.922380270000001	17.428001039999998	16.018	14.8774	16.5992	18.5206	39.6159	11.6683	6.33503	8.56459	14.0287	18.4546	16.164222430000002	21.3326	19.5231	30.2514	19.2059	22.3282	21.494021269999998	23.9375	24.6887	22.0588	7.77072
PsyrTA	2.05946	4.4822	1.50471	3.48698	1.5462	3.21254	3.19439	4.11914	3.05266	2.9979763900000003	2.16308	2.00029	5.96222	11.1008	14.884302300000002	7.75724	8.03827	6.87515	3.52036	3.05985	2.31915	4.05456	3.5909640900000004	4.54558	1.77212	3.64971	0	5.34715	4.86723	4.04017	10.5754	19.4652	25.1796	5.22742	2.9833595500000003	2.15205	2.8079	3.75188	4.07237	8.99095	9.71262	14.799885360000001	2.26159	2.4562	3.80891	4.91486	6.61314	6.25747	2.82916
Pycsar	6.05103	11.1735	5.88333	13.421785400000001	7.27357	10.451162029999999	4.57355	13.544857019999998	13.6108	11.5212	6.17411	10.8886	16.829079370000002	18.0029	12.3638	14.1396	10.8907	8.89121	8.23636	5.95419	7.08024	49.97417382999999	10.656352120000001	14.9267	20.602618460000002	26.4279	14.451207409999999	16.6735	18.5947	12.1999	24.392744999999998	23.5221	24.3459	2.77051	1.36935	2.82717	8.95413	14.0875	13.614441589999998	18.5914	17.547994029999998	13.3041	20.084821599999998	21.4094	27.759404729999996	20.3571	20.980447220000002	17.2483	24.1755
QatABCD	1.71431	4.95234	0.538043	1.6508690499999998	1.32654	1.6979	3.20006	2.81338	6.07281	1.18593	0.718168	1.38964	14.1748	14.2032	17.9654	10.1576	9.58065	8.300123630000002	6.57312	10.357189759999999	12.303	30.3345	14.5581	16.7342	10.276182760000001	9.01586	5.34453	14.3129	11.7476	11.4757	6.09323	8.58766	6.9155593500000005	7.36449	4.8924	4.54999	18.715150700000002	24.9675	26.5198	27.566	28.4448	39.2139	8.679688330000001	7.11539	9.40413	4.82847	11.474	5.47938	11.4928
RL	0	0	0	0	0	0	0.371928	0	0	0	0	0.643226	0.889276	4.1793	0.712744	1.13198	0.719963	0.65994	0.350609	0	0	0	0.338416	0	0	0	0	0	0	0	0	0	0	0	0	0	0	0	0	0	0	0	0	0	0	0	0	0	0
RM type I	81.9188	81.4661	75.0445	47.7613	93.7796	65.3632	91.8558	66.7353	109.898	59.3674	105.944	40.9004	171.038	183.624	262.2	166.513	150.013	150.846	220.505	94.8203	121.52	601.05	174.951	265.307	65.588	167.38	68.0349	143.123	118.779	69.1581	148.648	169.729	375.65	141.673	80.544	289.15598367999996	98.0485	148.63	130.398	206.495	188.669	190.899	61.6972	110.56	126.796	143.665	158.908	126.387	190.181
RM type II	113.844	135.45581171999999	113.587	109.682	132.469	128.781	202.63	203.337	240.683	196.04163536000001	209.446	144.471	534.183	526.182	892.589	493.72658210000003	303.415	427.194	342.603	260.896	347.199	1784.54	365.369	635.554	121.587	334.886	136.273	217.347	201.008	109.729	290.80469555999997	369.197	555.574	124.868	109.929	139.451	278.7	370.057	278.402	412.16370188999997	388.189	332.968	123.024	165.569	199.757	197.95349898999999	225.281	147.224	368.535
RM type II-2	16.1796	8.65446	12.6718	4.20751	12.0488	4.22963	14.150722309999999	6.14994	9.22722	4.97598	11.6051	3.78993	8.12695	12.2265	10.8962	9.65514	6.23289	8.90503	21.469387530000002	16.2736	21.518378509999998	59.846	22.1445	24.6176	10.8076	9.36078	5.77563	4.1065100900000004	3.92118	5.445720049999999	2.65876	2.51253	5.042569680000001	7.68044	5.48208	3.4085951000000003	5.41545	10.5444	11.134055830000001	8.48683	5.5909609499999995	11.1127	6.29376	3.4613153199999998	6.35242	2.75202	5.97788	5.56316	8.39991
RM type III	11.597	6.07577	8.21128	4.03031	8.18226	6.73318	11.6165	9.07785	13.6545	8.32566	6.1408963000000005	6.05647	146.267	92.6075	140.606	107.91795710000001	98.4879	81.443	68.2276	47.8149	76.1282	458.709	107.477	185.441	13.0737	27.292	7.5329188600000005	17.5656	17.431063260000002	9.84631	28.0297	38.6522	71.779	6.7292	6.78482	3.74193	34.5313	45.3064	37.7919	52.6726	43.206	43.2743	16.1826	20.7672	19.3841	16.0766	21.5501	12.2224	50.0494
RM type IV	14.822527659999999	15.9422	16.158	12.1233	17.643	16.074900630000002	21.064	15.3975	25.4811	15.1037	28.113051239999997	8.38977	29.5184	36.4222	51.966123010000004	30.8802	33.657115170000004	22.3289	23.147517999999998	35.8821	29.648	66.4467	25.981391549999998	154.622	42.2655	59.9645	25.8717	47.5429	37.8514	29.0599	31.8613	40.0932	66.749	18.5716	13.227838470000002	9.81023	27.6024	40.6597	47.6008	54.1459	53.815	51.4559	30.3496	49.5065	47.1401	46.2877	52.9557	39.6423	46.8029
RM type IV-1	1.72323	0	1.04574	0	0.942258	0	0.704796	0	0	0	1.34865	0	1.22443	0.315709	0.415891	0.893499	0.966672	0	89.5691	11.3131	23.2327	1.24677	1.39052	2.62389	0	0	0	0.433344	0.69994	0	0	0	2.15271	0.925245	0.759134	0.536818	1.50259	0	2.03608	1.30628	1.18459	1.73218	0	0	0	0	0.5076032500000001	0	0
Retron type I	0	4.42576	0	0	0	0	1.06861	3.32084	6.136912000000001	3.00042	0	2.43702	6.42891	6.90091	11.0348	4.45937	5.29286	2.59697	0	0.430079	0	1.53505	0.974702	1.43406	1.58204	4.0640464000000005	3.54543	5.81522	6.49591	2.48718	3.64309	7.90956	14.861310079999999	2.26231	1.7685563499999999	0.926616	2.39897	6.14963	4.52597	8.71113	7.45426	7.11353	3.24778	3.41331	4.50128	4.5641	5.06214	3.3637	4.0140609000000005
Retron type II	0	0	0	0	0	0	0	0	0	0	0	0	1.90113	2.13015	1.9651	1.96803	2.14574	1.17406	0	1.0611	0	0.978273	0	0	0	0.533527	0	0.770926	0.556338	0	3.43347	4.08537	7.44624	0.670257	0	0	0.836488	2.0444403099999997	1.22471	3.82041	5.04971	4.52674	0	0	0.389681	0	0.771994	0	1.74441
Retron type III	0	0	0	0	0	0	0	0	0	0	0	0	0	0	0	0	0	0	3.7759466999999995	0.557513	0	0	0	0	0	0	0	0	0	0	0	0	2.79823	0	0	0	0	0	0	0	0	0	0	0	0	0	1.21631	1.25607	0
Retron type V	0	0	0	0	0	0	0	0	0	0	0	0	0	0	0	0	0	0.789779	1.19617	0	0	0	0	0	0	0	0	0	0	0	0	0	0.284731	0	1.27087	0	0	0	0	0	0	0	0.689858	0	0	0	0	0	0
Retron type VI	0.333524	5.82596	1.17279	4.14653	0	5.82628	8.18467	8.90694	7.95092	8.19519	2.56933	5.619463929999999	34.0223	25.981288560000003	83.0209	27.8915	24.275220490000002	26.7886	6.56874	3.33358	5.39782	8.197133149999999	3.51801	13.662	1.12336	5.31264	0	10.9506	11.230128749999999	2.70913	7.81788	12.4007	28.148	7.74893	6.14835	6.43109	10.6096	16.6438	12.6378	26.631205790000003	24.4711	24.1192	1.9599746900000001	2.37277	3.31947	8.71011	10.1276	4.41522	10.1833
Retron type VIII	0	0	0	0	0	0	0	0	0	0	0	0	0	0	0	0	0	0	30.3637	1.65461	0.919141	0	0	0	0	0	0	0	0	0	1.31667	0	0.69141	0	0	0	0	0	0	0	0	0	0	0	0	0	0	0	0
RexAB	0	0	0	0	0	0	0	0	0	0	0	0	0	0	0	0	0	0	0	0	0	0	0	1.209	0	0	0	0	0	0	0	0	0	0	0	0	0	0	0	0	0	0	0	0	0	0	0	0	0
RloC	18.7792	26.7972	17.1934	25.9842	18.9772	23.9137	18.4336	13.2339	16.9302	13.8348	16.8493	10.484078760000001	32.459	36.4559	80.57397089999999	43.3035	36.0257	40.2442	85.2968	30.898257020000003	27.9669	89.5004	28.1761	37.8149	36.0713	43.3921	22.9219	34.179800979999996	26.6577	17.918448559999998	10.9684	20.2511	47.86	14.3179	10.387	7.43509	28.517	36.4535	35.6257	29.9206	20.1956	37.1446	41.0748	41.4594	42.2307	32.515445989999996	33.9021	26.4966	21.8605
RnlAB	0	0	0	0	0	0	0.7640290000000001	0.781825	0	0.463536	0	1.21082	23.8627	14.5393	20.3385	19.440070900000002	15.511156080000001	13.78	0	0	2.6399	12.899	65.0358	0	0.444635	3.62784	0	0	0	0	0	0.929038	0.43197	0	0	0	3.56311	4.4448510500000005	0.39699	5.56946	6.1897	4.8619908899999995	0.981247	0	0.60763	0	0	0	3.50912
RosmerTA	14.7215	13.4884	18.7444	11.5487	22.4515	15.7151	22.7371	20.5522	27.8039	22.6646	21.165	17.1097	53.658	44.0476	41.4072	38.608753459999996	43.3371	30.749806980000002	111.772	53.0978	72.2347	323.71102790000003	63.265158819999996	136.311	19.0424	56.6837	22.9819	19.8811	23.0081	8.61052	41.6597	43.462418400000004	72.342	12.859989449999999	6.71983	8.58031	45.418	63.7695	42.2566	70.1758	64.19449881999999	47.027284810000005	13.1712	22.4332	31.1264	24.4576	15.8296	8.21617	69.7105
SDIC3	0	0	0	0	0	0	0	0	0	0	0	0	0	0	0	0	0	0	0	0	0	0	0	0	0	0	0	1.14616	1.65736	0	0	0	0	0	0	0	0	0	0	0	0	0.232023	0	0	0	0	0.519313	0	0
SEFIR	1.6043	0.796664	1.45069	5.84266	2.41046	2.09933	2.7504800300000003	0.631612	4.62515	1.5816926900000001	3.13718	0.519379	3.3946188299999998	7.7678084499999995	7.0010137199999996	5.09579	3.8911586299999996	5.18332	37.390182100000004	5.20753	0.816924	6.15483	4.48453	0	3.98276	4.18104	2.94089	8.08612	7.59826	8.13222	5.59261	11.8124	13.3613	4.57148	7.15261	4.020689109999999	7.40144	3.6574460699999998	4.32912	6.2274218800000005	4.1241106599999995	5.28967	4.96045	5.4260946400000005	7.84052	5.131776589999999	10.1651	7.718006750000001	4.15698
Septu	10.6325	19.6228	14.7143	36.9549	9.89209	18.2666	11.917	16.485	27.367	12.4149	9.96655	6.76515	45.4161	44.564624710000004	80.2669	42.921034479999996	32.0724	41.1345	43.8268	20.414	26.6596	64.0003	34.7087	60.4247	32.387592059999996	51.9323	26.8407	35.2525	34.6386	25.0335	25.0921	31.5406	73.0393	31.7268	27.1215	34.1262	16.799	32.8942	30.8305	49.8629	38.5329	40.1056	38.1263	49.9763	52.7977	44.33	50.7494	31.6943	99.3907
Shango	11.5641	5.37453	9.65274	5.05704	8.65684	3.99887	14.108093929999999	4.171547090000001	13.9262	4.84967	12.5084	3.4937584900000003	13.7516	19.3286	33.9882	11.1955	7.00998	12.9466	47.6287	8.01564	11.2955	19.0302	16.9401	24.725162179999998	15.9972	15.9108	5.33896	21.2358	16.271	8.20798	21.594	22.6862	65.9605	12.1505	7.4329170300000005	8.7088	9.95061	13.682	11.2523	20.117193920000002	19.5284	26.8139	6.27396	12.585	9.23366	16.4628	18.3365	10.7442	11.3096
Shedu	12.1661	21.4459	13.4335	12.8474	13.4431	10.7137	9.89464	11.1527	9.25224	10.1455	8.82502	8.41148	28.428	31.6745	59.3098	38.5187	31.816862269999998	30.2995	51.388047220000004	32.2535	25.5175	10.7827	11.5519	8.96692	7.476540379999999	7.40693	1.43871	12.2732	11.5001	12.2997	1.88406	9.20473	7.49895	13.2546	8.85021	5.3766671200000005	0.832074	0	3.0173723700000004	10.6008	8.13199	12.1131	6.63056	5.23082	8.36733	9.9343	12.9037	9.44841	11.6352
ShosTA	0.473993	0	1.00743	0	0.794275	0.594162	0.994489	0	0.770774	1.32528	0.632708	0	1.64132	2.48259	2.35799	2.34359	1.09984	1.3497315200000002	6.10072	10.6255	7.1371484999999995	13.7334	6.51406	8.50911	2.49572	1.43318	0.724761	0	0	0	0	0	0.743063	0	0	0	0.887064	1.29481	2.7972	1.6831	1.26933	1.60616	1.23379	1.11556	0.920674	0	0.368669	0	1.7992
Sirona	0	4.96796	0	7.47202	0.917022	3.12628	2.27083	3.933	2.97154	0.7105782199999999	0	0	0	0	0	0	0	0	0	0	0	0	0	0	4.85733	5.12252	3.3979	3.67746	5.96571	4.00543	0	0	0	4.4928	2.65132	0	0	0.782908	4.01468	4.37128	5.14227	5.86151	7.03403	6.98746	10.1407	4.37767	9.19497	7.86075	0
SoFic	144.576	138.303	102.025	79.49	113.562	106.894	150.197	139.522	178.335	155.887	133.944	131.232	249.344	224.89464802999998	295.351	183.714	169.307	176.387	128.432	124.557	173.99	414.815	191.408	192.909	103.672	205.478	106.002	213.6	205.23210256000002	127.034	175.87	180.894	368.792	167.63	141.81	158.065	151.388	196.996	174.968	288.191	260.932	263.383	99.3466	127.51208661999999	147.508	203.267	211.171	152.268	233.11
SpbK	0	0	0	0	0	0	0	0	0	0	0	0	0	0	0	0	0	0	0	0	0	0	0	0	0	0.956872	0	0	0	0	0	0	1.30115	0	0	0	0	0	0.959348	0	0	0	0	1.22515	2.21924	0.561297	0	0	1.35523
SspE	5.06159	0.964738	0.928376	1.05118	1.0388	1.12227	1.68627	1.4477	1.55414	1.99384	0.726298	1.29653	1.64525	1.63922	0.726477	1.56514	1.19598	2.53379	0.630158	1.4603	2.13921	0	1.29635	0.888448	8.87728	6.10298	2.9525	0.928102	1.07534	1.18625	1.74974	2.30093	0.938588	3.31121	2.58004	2.0385	1.75031	2.21275	3.30306	2.26162	1.62769	1.48894	0.742304	0.54947	1.26212	0.741073	0.872309	0.880638	0.791506
Stk2	0	0.691713	0	0	0	3.80264	0	0	0	0	0	1.24718	0	0.402908	0	0	0	0	0	0	0	0	0	0	6.90876	7.8472	5.47611	0	0	0	0	0	0	0	0	0	0	0	0.708785	0	0	0	10.5188	11.1806	12.2425	3.01346	2.61176	3.26944	0
Sucellos	0	0	0	0	0	0	0	0	0	0	0	0	1.92457	0.907746	1.15036	1.09889	1.49193	2.77877	0	0	0	0	0	0	0	0	0	0.673824	0.827683	0	0	0.794248	1.3162	0	0	0	0.757302	0	0	0.485008	0	0.58402	0	0	0	0	0	0	1.18237
TIR-III	0	0.837274	0.637859	0.700612	0	0.460285	0.423364	0	0.645209	0	0	0	0	1.16789	1.73627	1.26412	0	0.497513	13.324641020000001	2.39928	1.1210861699999999	1.86923	0.330186	2.48553	1.4508579799999999	2.09382	0.804758	2.3581	1.6672	0	1.74466	1.76721	4.4394529899999995	1.2016	0.413199	0.60397	6.47711	7.19075	5.106784820000001	2.7953208600000004	2.9251	3.20412	0.530926	0.690767	1.91036	1.7694	3.09794	1.9082323799999998	0.210631
TIR-IV	0	0.598695	0	0.58447	0	0	0.302727	0.803332	1.16614	0.784475	0	0.512288	4.83347	4.82065	8.77362	5.22443	4.98427	5.59075	4.65924	1.99964	6.2982151900000005	30.9863	19.4165	67.2953	0.455571	1.65544	0	3.68324	2.71045	0	2.01763	3.5408	9.23665	3.5031464999999997	2.10431	2.37368	0.680368	3.40358	3.2212391499999997	3.9539850000000003	2.28635	4.27499	0.539251	0	0	3.20846	4.98224	2.89464	1.8819285199999998
Taranis	2.77697	0	0.434977	0	0	0	0	0	0	0	0	0	0	0	0	0	0	0	0	0	0	0	0	0	0.821005	0.435405	0	0	0	0	0	0	0	0	0	0	0	0.670866	0.573727	0	0	0.379758	0.707004	0	0.857317	0	0	0	0
TgvAB	7.44079	2.41251	7.699413460000001	1.69406	8.973396959999999	5.21635	10.0501	5.20712	12.4268	4.89765	19.294242999999998	5.63647	20.7991	19.4383	25.2924	18.3487	17.201356110000003	14.7815	7.975530740000001	6.91637	24.1972	79.6733	16.069	181.125	2.26603	7.45208	1.48055	13.921	13.4267	4.98915	15.4384	15.9117	32.9997	5.817060919999999	3.85294	5.34094	9.3315	13.5908	8.20249	30.4957	25.0299	21.1838	1.67872	2.34365	2.7537031400000003	15.0061	13.5894	10.0284	12.3936
Thoeris type I	4.81811	8.49218	3.23264	6.2513	3.71178	6.57551	5.24195	7.27668	8.1613	9.32272	1.9702	4.24341	9.16251	9.47209	9.71454	4.95813	3.99599	3.67615	9.73799	12.691	38.761645449999996	24.7478	8.43877	10.331508150000001	18.2662	18.9539	15.6969	16.1264	13.8804	12.8577	4.6221	7.46767	14.553264630000001	4.45526	2.82774	0.602171	20.1508	23.8875	26.0811	20.7383	23.526807050000002	28.4232	16.5314	12.567634680000001	17.362	9.39937	17.106031090000002	13.205	13.9607
Thoeris type II	4.5483737699999995	4.8052999100000005	4.38452	1.74717	4.44355	2.27832	2.7355108599999998	2.09468	2.4657	2.52937	5.77966	3.3257446600000002	3.03373	6.36815	2.46033	4.4446	3.27014	3.66784	0.779374	2.40867	12.974547950000002	4.06636	0.404764	0	5.0049908599999995	5.87054	1.59772	3.1617	2.90705	2.78484	0.607396	1.9972621899999998	2.04745	1.87521	1.21631	0.540826	7.86606	12.7036	11.5271	7.76126	7.31243	9.59043	4.24613	1.7811705899999999	6.19575	2.75922	6.3604	5.01849	6.1332295000000006
Thoeris type III	4.65354	5.0188	3.12292	8.36183	5.15661	4.2798196100000006	5.27035	3.7012970999999997	2.36359	5.58693	10.2689	2.54146	11.9255	15.298417539999999	21.170458840000002	18.0657	18.5872	18.707	0.716661	2.72858	15.6939	9.63116	3.24602	5.21202	3.54852	7.62529	3.44925	3.9570551000000003	1.49325	0	0	1.5514952499999999	4.11753	0.438927	0	0	5.210355219999999	6.24433	6.96861	5.86956	4.679526900000001	5.52388	1.99335	4.21985	9.04276	1.06844	2.1169	0	10.4638
Thoeris type IV	1.61564	4.23584	1.87218	2.34866	3.1978427700000003	4.15518	2.50692	4.55492	4.0301013900000004	3.9960193399999997	1.21107	1.71144	6.40057	5.30415	15.322013230000001	5.71735	4.54356	4.53883	1.88531	2.14653	7.493525900000001	2.07122	1.4926622299999999	0.884367	2.94009	4.33807	2.33317	6.09482	7.34091	5.814049799999999	3.77791	2.76823	4.89693	3.7767917300000002	2.0271	1.12971	1.131	3.49315	3.52542	11.333621699999998	8.58139	9.847240300000001	2.96771	1.84362	2.7152206100000003	6.00716	7.24055	6.18198	1.66603
Tiamat	0.57972	0	0	0	0	0	1.1976744099999999	0	1.32214	0	0.717215	0	0.841423	2.32346	6.68154	5.56623	4.33889	4.874264660000001	6.63644	0.859148	0.626715	1.34775	4.16749	2.30516	1.71317	2.10061	0.816299	1.95479	2.04587	0.805911	1.43907	2.07155	11.301	2.03069	0.583986	0.874215	0	0.671617	0.579626	1.6585	1.54747	1.8173	2.08699	2.18702	2.5250569499999997	2.7349943000000003	3.08693	2.30858	8.94315
Tin	0	0	0	0	0	0	0	0	0	0	0	0	2.8679	1.87912	2.30178	0.867297	1.20642	1.76813	0	0	0	0	0	0	0	0.687563	0	0	0	0	0	0	0	0	0	0	0	0	0	1.79885	1.70856	0.974978	0	0	0.534585	0	0.365141	0	0.497777
Tmn	0	0	0	0	0	0	0	0	0	0	0	0	0	0	0	0.857484	0	0	0	0	0	0	0	0	1.81526	1.60907	1.35402	0.656285	0	0	0	0	0	0	0	0	0	0	0	0.596594	0	0	2.6358	2.29679	3.02676	1.52914	1.85765	1.26871	0.290237
Toutatis	0	0.729629	0	0	0	0	12.3837	1.45632	7.64331	0.468264	1.32529	0	13.5783	14.2492	44.1767	15.868977619999999	23.1534	28.2077	0	0	0	0	0	0	0.512707	1.0962	0	1.4209	1.71474	0	0	1.04281	6.7784849000000005	0.885177	0.680532	0	1.93471	2.96871	2.2186553399999998	1.4759	0.724547	2.8681583699999997	2.25321	1.14022	0.978232	1.05319	0.8464	0.598438	0.548064
UG17	0	0	0	0	0	0	0	0	0	0	0	0	0	0	0	0	0	0	0.408366	1.12141	20.7647	0	0	0	0	0	0	0	0	0	0	0	0	0	0	0	0	0	0	0	0	0.525438	0	0	0	0	0	0	0
UG19_large	0.731441	0	0	0.48941	0.868679	0.600047	0.411463	0	0	0	0	0	0	0	0	0	0	0	0	0.43927	0	0	0	0	1.74075	1.18267	1.96758	0.545162	0.423652	0	0	0	0	0	0	0	0	0.73818	0.790489	0.499709	0	0.824941	2.06155	0.969128	1.55288	0.635938	0.36031	0.451685	0.616354
UG29	0	0	0	0	0	0	0	0	0	0	0	0	0	0	0	0	0	0	5.79091	0.637795	0	0	0	0	0	0	0	0	0	0	0	0	0	0	0	0	0	0	0	0	0	0	0	0	0	0	0	0	0
UG33	3.0463	2.47903	3.1425780999999997	4.21621	3.7849823000000002	4.7922902999999994	4.66998	0	0.700784	2.4009125300000003	6.156177400000001	3.6613	0	0	0	0	0	0	0	0	0	0	0	0	0	0	0	0	0	0	0	0	0	0	0	0	0	0	0	0	0	0	0	0	0	0	0	0	0
UG4	0	0	0	0	0	0	0	0	0	0	0	0	0	0	0	0	1.1672	0	0.838453	0	2.1613	0	1.38718	131.449	0	0	0	0	0	0	0	0	0	0	0	0	0	0	0	0.61001	0	0.980309	0	0	0	0.989564	0.866222	0	0
UG8	0	0	0	0	0	0.773101	0	0	0	0	0	0	0	0	0	0	0	0	0	0	0	0	0	0	1.56122	2.00099	0.903738	0.322167	0.354792	0	0	0	0	0	0	0	0	0	0.559096	0	0	0	0.951561	1.04832	0.782529	0	0.549128	0	0
Uzume	2.8780576599999996	0.612864	0	1.45768	2.1830698699999997	2.89788	1.949	14.6578	6.4596	12.3575	2.92943	9.19124	30.8856	18.1688	15.7003	19.5644	14.3916	9.93237	14.2965	7.30859	6.818223430000001	78.1614	10.8726	29.336	4.1576821200000005	19.8724	7.799027430000001	7.19357	9.58831	3.1824326999999997	10.041239319999999	9.40123	9.72254	0.813803	1.39897	1.66584	37.0051	41.951	31.0901	11.0338	9.71063	5.17674	2.23949	11.6678	13.498235900000001	2.5903	4.36746	4.379698449999999	29.5592
VP1817	0.333524	6.88717	1.32386	5.53577	0	5.33252	4.08498	1.67247	5.63107	1.02151	0	0	25.728588100000003	18.1341	81.5718	11.2894	9.51749	15.921338500000001	2.32759	2.95267	2.79656	4.297524510000001	2.4304	3.0693	0.837434	4.64811	1.28951	6.7664900999999995	7.26001	2.59257	2.35728	6.01318	13.936	3.9146031199999998	2.94302	1.88839	11.7611	19.6373	14.9479	12.893057500000001	18.88	19.6346	4.6837922800000005	5.77933	4.601	8.43523	8.75644	5.242702100000001	2.87919
VP1826	0	0	0	1.95174	0	0	0	3.50801	1.21225	2.31736	0	7.25952	0	0.995236	0	0	0	0	0	0	0	0	0	0	1.04366	7.22216	2.08424	1.0171	1.32866	0	0	0	0	0	0	0	0	0	1.40993	0.845972	0	0	0	1.2012	1.38992	1.03465	0.687947	0	0
VP1839	0.973635	0.9905082700000001	2.28364	0	1.61034	0	0.983953	0	0.516421	0	0	0	4.2297574000000004	3.0224736500000002	1.87985	2.98357	6.61908	7.15712	1.86643	0	0.573919	0	0	0	2.44707	2.8810238999999997	1.00001	1.23209	1.7749335099999999	0	0	0	0	0	0	0	4.57095	16.829830729999998	2.36692	1.5319727699999999	0.742125	1.9358	1.92986	1.84626	1.63352	0	0	0	2.5101573999999998
VP1840	0	0	0	0	0	0	0	0	0	0	0	0	0	0	0	0	0	0	0	0	0	0	0	0	0	0	0	0	0	0	0	0	0	0	0	0	0	0	0	0	0	0	0	0	0	0	0	0	0
VP1851	0	0	0	0	0	0	0	0	0	0	0	0	7.31714	7.426847309999999	7.78007	7.2332	4.79054	4.95444	4.43147	4.2199	8.304618999999999	70.24162319999999	5.4435	19.0048	0.424664	2.9862	0	2.21246	2.75624	0	6.54493	7.13895	7.27927	0	0	0	9.725053149999999	10.555783739999999	8.023797029999999	6.18953	5.66446	3.44066	0	0	2.11731	0	1.7655669399999998	1.8724	6.99342
VP1853	11.8371	8.8753	6.55539	6.9729855700000005	7.77267	5.38701	11.7063	7.367149510000001	9.15517	10.7407	8.30394	8.33482	11.6684	16.3661	20.1835	10.9466	8.94617	11.2306	8.43364	15.0157	14.161482289999999	32.1804	12.1902	11.7318	6.53924	7.33688	6.81921	6.63241	8.91472	4.3788502000000005	5.73085	8.410796900000001	19.7677	4.58197	5.09399	2.5232992000000003	6.7838	6.78588	9.30508	16.1679	12.181	10.4095	6.86514	5.85198	6.27034	7.42613	6.91483	3.6284461200000004	9.42924
Viperin solo	0	0	0	0	0	0	0	0	0	0	0	0	0	0.379802	1.70348	0	0	0	0	0	0	0	0	0	0.393322	1.565	0.944921	0	0	0	0	0	0	0	0	0	0	0	0	0	0	0	0	4.52491	2.82939	0	0	0	0.387013
Viperin-TPR	3.62951	1.68479	4.07117	0	5.54988	1.66523	2.71871	1.6374540899999999	2.47384	2.19149	2.1675318800000003	1.78211	3.43877	3.70182	3.61079	3.85406	2.35784	2.04451	2.34933	1.74321	3.56408	23.5108	2.20384	10.951	1.35297	5.4108	2.01532	2.76389	2.0049539100000002	0.47982	0.602596	0	2.00148	0.627761	0.421103	0	0.948302	4.11828	2.93321	4.68828	4.3628196500000005	4.72328	0	5.20084	4.07442	0	0.386315	0.685774	5.64419
Viperin-Toxin	0	0	0	0	0	0	0	0	0	0	0	0	0	0	0	0	0	0	0	0	0	0	0	0	0.400077	0.267467	0	0	0	0	0	0	0	0	0	0	0	0.760442	0	0	0	0	0.452405	0	0	0	0	0	0
Wadjet type I	29.725	19.8291	22.8135	13.2722	26.3229	15.402799980000001	25.4093	13.201392590000001	14.456994869999999	17.7653	31.3596	16.4482	9.900756900000001	24.489524080000002	7.63401	12.7096	9.91215	9.99764	9.25916	7.2994	26.6625	8.05989	8.39704	7.50547	5.7831179200000005	4.64248	1.9078115900000001	11.5874	10.601	9.93805	7.724541930000001	7.64243	8.108324620000001	15.7604	10.663683729999999	8.653414569999999	5.67664	2.7499795299999996	2.85135	14.2748	11.4369	13.993132430000001	3.86607	2.049	1.28921	6.7508848100000005	8.70489	6.02494	5.489727970000001
Wadjet type II	6.1203555000000005	4.74981	4.5372	2.24773	3.41373	2.24811	5.1426	1.61379	2.33552	3.05569	5.92023	3.7321451000000003	0	0.7188659500000001	0	0	0	0	0.427663	0.676177	2.50895	0	0.530461	0	2.2211745599999997	0.646834	0.550458	0	0	0	0	0	0	0	0	0	1.54901	1.95856	1.65321	1.21396	1.4112	1.77398	0.859589	0	0.528848	0	0	0	0.376746
Zorya type I	1.2624696599999998	0	1.06189	1.85263	2.34005	1.66249	2.58146	4.92576	6.02515	5.93759	4.531818449999999	4.0712468600000005	8.161622099999999	9.30573	15.521125300000001	4.80321	3.94431	2.84763	7.52954	6.423299729999999	9.48079	83.7113	10.6894	16.4938	3.56052	8.84869	2.37589	7.60338	8.639	5.653962679999999	14.1891	14.4956	20.5598	3.45537	3.56225	3.32543	3.68712	4.38402	6.08474	7.17648	8.87562	7.86891	1.6604	3.9107100100000003	5.34998	8.984167900000001	8.17723	5.35909	16.674
Zorya type II	0	0	0	0	0	0	0	0	0	0	0	0	0	0	0	0	0	0	0	0	0	0	0	0	1.24703	0.764217	0	0	0	0	0	0	0	0	0	0	1.05639	2.46091	3.04046	0	0	0.477811	0	0	0.835973	0	0	0	0
Zorya type III	6.02817	1.9082466700000003	1.03731	0	0.999119	0.587942	0.26159	0	3.27406	0	0.745292	0.748029	0	0.671084	0	0	0	0	1.70279	3.92087	4.30414	0.601754	1.68334	1.07696	4.9097	3.22691	1.58848	9.48662	5.60466	2.71412	0.847327	0.800605	0.567463	0	0	0	4.95482	6.558	8.8066	2.31671	2.2871	3.96048	5.250138199999999	1.85594	2.16932	1.9476023199999999	0.9424328900000001	0	1.12701
dCTPdeaminase	1.18604	1.14352	1.27629	0	0	0	1.42757	0	0	0	0.310147	0	0	1.5422504099999998	0	0.805755	0	0.66698	6.31891	3.8539537299999997	0.521664	0	0	0	0	1.21047	0	0	0	0	0.479604	5.135199500000001	0.833857	2.11732	0	0	0.94968	0.809245	0.656001	3.8046449100000004	6.2026105000000005	6.76021	0	0	0	0	0.461247	0	0
dGTPase	0	0	0	0	0	0	0	0	0	0	0	0	0	0	0	0	0	0	4.10435	1.18266	0	0	0	0	0	0	0	0	0	0	0	0.683703	2.50811	0	0	0	0	0	0	0	0	0	0	0	0	0	0	0	0
gcu24	0	0	0	0	0	1.34333	0	0	0.5017	0	0	0	1.08916	1.45081	0.644105	0.46424	0	0	10.5098	6.18925	4.04367	10.8562	3.42691	3.69147	0	0.713418	0.645669	3.61848	2.65316	1.6509329799999999	0	0	0	0.740051	0	0.539985	1.08777	1.87276	0.794738	1.48687	0.540727	0.932398	0	3.01202	0.9667693799999999	5.0640499000000005	5.42823	6.55461	0.391921
gcuWGS21	0	1.72449	0	0	0	0	0	0	0	0	0	0	0	0	0	0	0	0	2.12209	3.90556	0.579621	0	0	0	0	0	0	0	0	0	0	0	0	0	0	0	0	0	0	0	0	0	0	0	0	0	0	0	0
pAgo	0	0	0	0	0	0	0	0	0	0	0	0	0	0	0	0	0	0	1.96219	0.433028	0.569741	0	0	0	0	0	0	0	0	0	0	0	0	0	0	0	0	0	0	0	0	0	0	0	0	0	0	0	0
pAgo LongB	0.605547	0	0	0	1.05409	0	0.575623	0	0	0.380939	0	0	0	0	0	0	0	0	0	0	0	0	0	0	0	0.271976	0	0	0	0	0	0	0	0	0	0	0	0	0	0	0	0	0	0	0	0	0	0	0
pAgo S1B	3.85567	7.18381	3.2550578999999997	4.592332000000001	3.62758	4.4540009000000005	3.15463	3.39465	2.07396	4.7692	3.7781852000000002	2.80513	4.4038	5.5573502999999995	4.23309	4.97403	5.09078	4.847300799999999	1.3303741900000001	2.03319	3.09535	3.87901	2.71933	2.3199338000000003	0.371107	0.5805349200000001	0	0.6333018699999999	0	0	1.5380538700000002	2.10285	1.43924	2.53832	1.53987	1.56077	0	0	0	2.1151204999999997	2.10721	3.25721	0.460636	0	0	0	0.678134	0	1.47126
pAgo S2B	1.1004	0	0	0.602363	0	1.2234180700000001	0.740863	0.776209	0	1.74695	0.514846	1.08689	0	0.86676	0	0	0	0	1.3578142500000001	2.00529	2.90893	7.7788	1.94191	2.70087	0	0	0	0	0	0	0	0	0	0	0	0	0	0	0	0.5183755400000001	0	0.592055	0	0	0	0	0	0	0
pAgo SPARTA	0	0	0	0	0	0	0	0	0	0	0	0	0	0	0	0	0	0	0	0	0	0	0	0	0	0.272855	0	0.516077	0.38549	0	0	0	0	0	0	0	0	0	0	0	0	0	0	0	0	0	0	0	0
Phage
Defense_Subtype	Sample_01	Sample_02	Sample_06	Sample_07	Sample_11	Sample_12	Sample_40	Sample_41	Sample_45	Sample_46	Sample_50	Sample_51	Sample_28	Sample_32	Sample_36	Sample_67	Sample_71	Sample_75	Sample_16	Sample_20	Sample_24	Sample_55	Sample_59	Sample_63	Sample_03	Sample_08	Sample_13	Sample_42	Sample_47	Sample_52	Sample_29	Sample_33	Sample_37	Sample_68	Sample_72	Sample_76	Sample_17	Sample_21	Sample_25	Sample_56	Sample_60	Sample_64	Sample_04	Sample_09	Sample_14	Sample_43	Sample_48	Sample_53	Sample_30
3HP	0	0	0	0	0	0	0	0	0	0	0	0	0	0	0	0	0	0	0	0	0	0	0	0	0	0	0	0.989326	0.952474	0.806764	0	0	0	1.211	1.0344	1.42326	0	0	0	0	0	0	0	0	0	0	0.387391	0	0
Abi2	0	0	0	0	0	0	0	0	0	0	0	0	0	0	0	0	0	0	0	0	1.58479	0	0.574869	0	0.402213	1.15742	0.594173	0	0	0	0	0	0	0	0	0	0	0	0	0	0	0.189959	0.554683	0.575834	0.511307	0	0.286335	0	0
AbiAlpha	0	0	0	0	0	0	0	0	0	0	0	0	0	0	0	0	0	0	5.50141	0.817006	0	0	0	0	0	0	0	0	0	0	0	0	0	0	0	0	0	0	0	0	0	0	0	0	0	0	0	0	0
AbiD	0.806088	0.469724	0	0	0.433578	0.895539	2.10448	1.21972	0.701645	0.58624	1.76585	1.44522	1.38966	0.665441	0	0	1.18307	0	0.962861	0.807114	3.41908	0	0.658628	3.36441	0	0.458496	0.452288	0.420495	0.489794	1.34795	0	0	0	0.49253	1.17339	0.898105	0	0	0.676004	0.546991	0	0.371822	0	0	0	0	0.568439	0.882998	0.47624
AbiE	4.87281	3.09488	3.08935	3.19747	2.96435	2.33086	4.487964020000001	4.5921503999999995	4.89143	10.6234	2.46772	4.1174596999999995	5.330246499999999	5.85334	3.09245	7.57257	4.96453	7.265946799999999	2.50661	4.3012	6.77892	1.73452	9.31805	5.53899	4.31867	5.936331539999999	6.63659	2.93141	3.56562	3.00054	5.0550125999999995	5.589309200000001	4.80397	6.84209	10.2927	7.826446689999999	5.56929	5.44122	5.46321	6.37235	4.407030600000001	4.57795	2.08554	1.9551014100000002	2.6202316100000003	1.7949867099999999	3.20889	1.856	4.03951
AbiH	7.23748	4.24039	0.654833	2.45845	2.8643	3.05644	6.46942	3.88349	3.11329	6.83994	1.64201	3.4860411399999998	6.61449	6.15742	2.80051	6.231275409999999	6.43479	5.61995	2.09521	4.06174	3.04912	0.910338	9.73445	0	2.033	2.2055	2.06229	1.35528	2.49667	2.07123	6.178280129999999	2.77967	3.29807	8.23086	11.573237390000001	4.80897	2.29649	3.73556	4.35924	4.96745	3.33508	3.61455	0	0	1.51319	0	2.81358	1.5091	3.44283
AbiJ	3.65491	1.82767	2.47117	0.786525	3.01101	0.821465	0.586764	1.01432	0.40664	1.03612	1.26981	1.09792	0	0	0	0	0	0	0	0	0	0	0	0	0	0	0	0	0	0	0	0	0.451462	0	0	0	0	0	0	0	0	0	0	0	0	0	0	0	0
AbiL	1.1939	0.612882	0.941668	0	0.848484	0	1.94139	0.895095	3.92036	0.721118	1.22455	0	0	0.488985	0	0.594497	0	0.598508	0	0	0	0	0	0	1.46747	1.45788	0	6.2993	4.87264	2.83223	0.973275	0	0	1.18416	0.845035	0.922705	0	0	0	0.49704	0.612367	0.618804	0.863071	0	0.599623	1.26803	1.08822	1.19387	0.521519
AbiO/Nhi	0	0	0	0	1.65328	0	0.445566	0	0	0	0	0	2.04616	1.41318	1.33912	1.42003	1.42745	0.827374	0	0	0	0	0.33942	0	0	0	0	0	0	0	3.12657	1.95777	1.12085	1.80556	2.63084	1.4057	0	0	0	0	0	0	0	0	0	0	0	0	0.876527
BREX type I	0	0	0	0	0	0	0	0	0	0	0	0	0	0	0	0	0	0	0	0	0	0	0	0	0	0	0	0	0	0	0	0	0	0	0	0	0	0	0	0	0	0	0	0	0	0	0	0	0
Belisama	0	0	0	0	0	0	0.214432	0	0	0	0	0	0.612105	1.19763	0	0.710689	0	0.454249	0	0.448503	0	0	0.412121	0	0	0	0	0	0	0	0.757626	0	0.802504	0.868191	0.783555	0	0	0	0	0	0	0	0	0	0	0	0.203304	0	0.246171
BstA	0	0	0	0	0	0	0	0	0.673138	0	0	0	0	0.940699	0	1.4314	0.650571	0	0.697911	3.09837	1.11649	2.18978	1.38425	1.59665	0.461977	1.30274	0.734344	3.7841077800000003	1.18495	0	0	0	1.75738	0	0	0	0	0	0	1.1614286100000002	0	1.1286990000000001	0	2.11933	1.89579	0	1.71015	0	2.6894
Butters gp30-gp31	5.88016	3.50176	2.64925	1.16059	1.8560858599999999	1.80168	5.36734	5.610894699999999	3.44173	5.82355	6.49882	3.79132	0.550545	0.502298	0.551647	0.6842552399999999	0.74311	0	0	0	0	0	0	0	0	0	0	1.19022	1.07844	0	0	0	0	0	0	0	0	0	0	1.8370891999999999	0.770914	2.2989922099999998	0	0	0	0.41849	1.2818211800000001	0.762273	0
CBASS type I	2.10053	1.09181	0.980644	0	1.23336	0.554044	1.10184	0.558094	0	0.554725	1.01439	0	0.535601	0.908278	1.20069	0.586265	0	0	0	0	0	0	0	0	0.852457	0.520543	0	0.750648	0.810286	0	0	0	0.325836	0.772666	0	0.660432	0	0	0	0.578945	0	0.942519	0.596447	0.701748	0.7418	0.906194	0.639734	0.419764	1.26015
CBASS type II	0	0	0	0	0	0	0	0	0	0	0	0	0	0.495942	0	1.0253	0	0	0	0.858737	0	0	8.10586	0	0	0	0	0	0	0	1.13147	0	0	0	0	0	0	0	0	0	0	0	0	0	0	0	0	0	0
CRISPR-Cas adaptation	0.90167	1.17553	0	1.18039	0.873386	0	1.70836	1.12166	0.800982	1.643	0	1.34116	1.53188	0.704565	0	1.31131	0	1.60715	2.33589	0.816551	1.16777	0	1.81311	1.26874	0	0.674962	0	0.457169	0.758103	0	1.13251	0	1.1609	0.850403	1.63511	1.10612	1.3359	1.16997	1.72561	1.57424	1.19216	0.930524	0	0.95408	0.775255	0	0.62339	0	0.402246
CRISPR-Cas type I	0.425789	1.0188	0.674299	1.22411	0.531626	1.03398	0.810148	0	0.57213	0.410749	0.822061	1.41855	1.6113	0	0	0.690965	0	0	0	0	0	0	7.94472	0	0	0	0	0	0	0	1.78444	0	0	0	0.922756	0	0	0	0	0	0	0	0	0	0	0	0.292214	0	0
CRISPR-Cas type IV	0	0.587631	0	1.25661	0	0.596392	0.308138	0.55069	0	1.09997	0	0.718315	0	0	0	0	0	0	0	0	0	0	0	0	0	0	0	0	0	0	0	0	0	0	0	0	0	0	0	0	0	0	0	0	0	0	0	0	0
CapRel	0	0	0.536291	0	0	0	0.562898	0.853563	3.69105	0.590414	0.707718	1.11132	6.3321985000000005	3.06908	6.10818	3.8647	6.97607	3.8888	1.19101	1.4253100600000002	2.5683027000000003	12.623812299999999	4.28282	4.99869	0.405617	1.1067	0	3.34174	4.48432	2.09622	1.88689	2.1726	2.24489	1.6049265799999999	1.18424	1.11296	0	1.3031591599999999	0.704713	4.08915	4.11695	2.36994	0	0	0.502973	2.77693	3.0831011900000003	1.38564	2.54917
DRT class II	3.8540059199999996	2.19411	1.50266	2.06377	2.55593	1.54779	3.33919	3.15797	2.6719553300000003	4.6929356900000005	0.98517	3.21955	2.43265	2.25726	0.984648	2.7445	2.89115	2.22961	1.68544	3.6074964200000004	3.20511	1.24601	3.81729	1.49151	1.65157	1.10586	2.37582	1.70779	2.62576	2.0554634800000002	2.5484	2.29772	1.63688	2.68309	4.02527	3.0562040799999997	3.52158	2.21964	3.04085	2.7606785599999997	2.18834	1.60218	1.57523	0.999928	1.9726171099999998	0.924574	1.6993379800000001	1.7603558099999999	1.57489
DS-1	0	0	0	0	0	0	0	0	0	0	0	0	0	0.527833	0.466235	0.501158	1.02733	0	40.4663	1.95084	3.27724	4.48524	0.464687	1.1606	0	0	0	0	0	0	0	0	0	0	0	0	0	0	0	0.973713	0	0	0	0	0	0	0	0	0
DS-29	0.56208	2.12281	0.729594	0	0	0.531824	0.7303	2.24481	0.604529	0.523136	0	0.786228	0	0	0	0	0	0	0	0	0	0	0	0	0.659117	0.421957	0	2.16628	2.14217	2.262	0	0	0	0	0	0	0	0	1.19998	0.768008	1.31778	1.40573	0	0	0	1.39626	2.49902	2.35404	0
DS-33	0	0.53246	0	0	0	0	0	0	0	0	0	0	0	0	0	0	0	0	2.03859	4.0228	1.19069	0	0	0	0	0	0	0	0	0	0	0	0	0	0	0	0	0	0	0	0	0	0	0	0	0	0	0	0
DS-4	0	0.47901	0	1.06886	0	0	0.264981	0	0	0	0	0	0	0.346325	0	0	0	0	0	0.303095	0	0	0	0	0.624289	0.285614	0.646228	0	0	0	0	0	0	0	0	0	0	0	1.01814	0.28963	0.386568	0.515633	0.67634	0	0.560775	0	0	0	0
DS-6	0	0.470184	0	0.535181	0	0	3.16589	0	6.7422	0	0	0	3.8546921899999997	6.81875	22.765352739999997	5.3904013299999995	4.10269	6.57913	0.934	0.8715828299999999	0	0.55942	1.4130569099999999	0	2.09212	9.19741	1.75443	11.3645	9.28765	7.260613129999999	7.35245	8.502464119999999	24.9475	5.16998	0.836141	0	3.52893	9.27931	7.46483	5.78712	5.7887857799999995	7.936705229999999	3.5709946599999998	6.84975	5.08579	20.0382	15.3506	12.1135	1.8603
DarTG	1.56666	1.14814	0	1.60192	0.982449	2.65846	1.06503	2.53203	0.721285	1.5771508600000002	0.562965	2.8572395999999998	0	2.04825	1.81239	1.3298	1.15141	2.34925	0.503301	0.730167	1.67657	2.01618	1.9667326200000002	3.56912	0.899248	0.399748	1.24329	0.802438	1.03869	1.66204	0.850864	0.609603	0.531512	0.760667	0.939622	0	1.02716	0.823938	1.00899	1.10765	0	0.530042	0.527279	0	0.498803	0	0.7431087000000001	1.09013	0.8627036299999999
DndFGH	0	0	0	0	0	0	0	0	0	0	0	0	0	0.243589	0	0	0	0	0	0	0	0	1.68204	0	0	0	0	0	0	0	0	0	0	0	0	0	0	0	0	0	0	0	0	0	0	0	0	0	0
Eleos	0.649945	0	0.532786	0	0	0.873214	0.527334	0.559744	0	0.761342	0.546979	0.968866	0	0	0	0	0	0	1.76819	3.15045	0.866816	0	0	0	0.341991	0.494013	0.645545	0.349817	0	0.545725	0	0	1.04261	0	0	0	0	0	0.675398	1.50288	1.395	2.31075	0	0.579619	0.753913	0.421507	0.661069	0.56134	0
Gabija	1.3520662099999998	0	2.11547	0	2.08782	0	4.36201	0.6323	1.47045	0	5.07295	0	3.00645	1.1485828900000001	0	1.58687	2.04558	0.871381	0	2.14276	0	0.710393	1.1464	7.61408	0	0.318266	0	0.439411	1.2037377999999999	0	1.60205	0	0	0	3.10672	0.584158	0	0	0	0.343746	0	0.720948	0	0	0	0	0.853612	0	2.62829
HEC-02	0	0	0	0	0	0	0	0	0	0	0	0	0	0	0	0	0	0	0	0	0	0.875944	2.08065	0	0	0	0	0	0	0	0	0	0	0	0	0	0	0	0	0	0	0	0	0	0	0	0	0	0.361465
HEC-05	5.05651	1.96769	3.30726	1.3373895199999999	5.5065	3.2196930999999998	7.51048	0.786484	3.64182	1.5743312999999999	12.3462	2.0226569100000003	0	0.602812	0	0	0	0	0	0	0	1.28262	1.67059	1.50301	1.18467	1.75775	1.24878	1.02585	1.3855988099999998	0.602611	0	0	0	0.535349	0	0	0	0	0	1.24637	0	0.943658	0.904243	0.804619	0.856842	0.696873	1.36593	1.8450849599999999	0.52633
HEC-06	6.81985	5.78275	5.8735	4.0375209000000005	6.094158500000001	3.9405620999999997	8.116724470000001	4.435376720000001	3.1552461899999997	6.4516997400000005	7.082449199999999	5.759411699999999	2.47723	2.6819922099999998	1.09691	4.1546	3.32102	1.52044	3.24451	1.34701	0.956078	2.31749	2.2499833000000002	1.02525	3.45095	2.4001061100000003	1.2882	0.985705	1.8001317499999998	0.579929	1.12812	0.908112	2.09476	2.76091	3.33758	1.99662	0	0.840074	1.56717	2.0472607199999997	1.37032	2.00124	0.710374	0	0.419658	1.0498337100000001	1.3034387600000001	0	2.6189
Hachiman	0	0	0	0	0	0	0	0	0	0	0	0	0	0	0	0	0	0	0	0	0	0	0	0	0	0	0	0	0	0	0	0	0	0	0	0	0	0	0	0	0	0	0	0	0	0	0	0	0
Hachiman type I	0.590082	0.553901	0	0	0.715708	0	0.796664	0.7739	0.664971	0	0	0.595833	0	0.716785	0.723585	0.626833	0.639415	0	0	0	0.825363	0	1.50477	0	0.464186	0.318036	1.00954	0.495452	0	0	0.677301	0	0	0.557499	1.08492	0.813061	1.21696	1.2659	1.02035	0.830457	0.968513	0.704659	0	0	0	0	0.312095	0	0.477347
Her-SIR	1.25611	0	0	0.588459	0.617618	0	1.26028	1.20688	0.834279	2.04153	0	0.452205	1.30162	1.17911	0.723485	1.5790975399999998	1.2233	1.50723	0	1.04932	1.32807	0	2.1056500700000003	0	0	0.255521	0.74818	0.538443	0.885386	0	1.70384	0.660218	0.9915461700000001	1.78508	2.14748	1.55664	0.574411	0.510357	1.4181362499999999	0.98116	0	0.298217	0	0	0.367906	0	0.754335	0	0.577107
Hma	0	0	0	0	0	0	1.14586	0	0.799152	0	0.947722	0	0	0	0	0	0	0	0	0	0	0	0	0	0	0	0	0	0	0	0	0	0	0	0	0	0	0	0	0	0	0	0	0	0	0	0	0	0
Hna	0	0	0	0	0	0	0	0	0	0	0	0	0	0	0	0	0	0	0	0	0	0	0	0	0.465178	0.407249	0	0	0	0	0	0	0	0	0	0	2.95546	3.79105	2.04151	0	0	0	0.916154	0	0	0	0	0	0
HsdR-like	0	0	0	0	0	0	0	0	0	0	0	0	0	0	0	0	0	0	0	1.93062	0	0	0	0	0	0	0	0	0	0	0	0	0	0	0	0	0	0	0	0	0	0	0	0	0	0	0	0	0
IetAS	0	0	0	0	0	0	0.217041	0	0	0.506189	0	0	0	0	0	0	0	0	0	0	0	0	0	4.46949	0	0	0	0	0	0	0	0	0	0	0	0	0	0	0	0	0	0	0	0	0	0	0	0	0
Kiwa	1.55022	0.544674	0.966588	0	0.700999	0	2.29037	0.556835	0.853471	1.43581	3.6162	0.510633	0	0.854177	0.515817	0.748839	0.637739	0.516954	17.952	1.85639	1.06728	0	0.814214	9.30941	1.05998	0.9534265500000001	0.682659	0.288853	0.367711	0	1.6305826799999998	0.573393	0.964632	1.04064	0.939194	0.731916	0	1.15071	1.11352	0.7932309500000001	0	0.783482	0.751616	0	0.527878	0	0.277504	0	0.427864
Lamassu Cap4-nuclease	0	0	0	0	0	0	0.547552	0.517336	0.565549	0.968285	0	0	0	0.359974	0	0	2.12423	0	0	0.894178	0	0	9.02182	0	1.92548	2.3375	1.52133	1.76539	1.8373368700000001	1.25154	3.67314	1.9005	2.29138	1.11415	1.3886	0	0	1.28501	0.631163	1.53867	0	0.500709	2.30691	2.4481	2.4738	1.42229	1.8991734399999998	1.75339	0.505932
Lamassu Hydrolase-Protease	0	0	0	0	0	0	0	0	0	0	0	0	0	0	0	0	0	0	0	0	0	0	7.62244	0	0	0	0	0	0	0	0	0	0	0	0	0	0	0	0	0	0	0	0	0	0	0	0	0	0
Lamassu Hypothetical	5.99618	0	7.79617	0.539633	8.46691	0.671732	7.25461	0	5.36799	0	12.7547	0	0	0	0	0	0	0	0	0	0	0	0	0	0.528692	0.573694	0.516491	0.855715	0.583933	0	0	0	0	0	0	0	1.16681	0.685008	1.12105	2.41227	2.67958	4.91892	0	0	0.361593	0	1.14463	0.931909	0
Lamassu Mrr	0.754065	0	0	0	0	0	0.370749	0	0	3.39691	0	0	0	0.311273	0.367943	0.527111	0	0	0	0	0.721221	0	0.930947	1.02261	0	0	0	0	0	0	0	0	0	0.574991	0.579059	0	0	0	0.553453	0.469733	0	0.285192	0	0	0	0	0.286327	0	0.314324
Lamassu family	4.43468	0.481796	5.51082	0	5.73147	0.62387	5.1143421700000005	0	3.61019	0	8.93945	0	0	0	0	0	0	0	0	0	0	0	0	0	0.449463	0.640316	0.651305	0.368284	0.446424	0	0	0	0	0	0	0	1.40657	0.670588	1.14049	2.72061	2.72775	5.24071	0	0	0.448798	0	0.799114	0	0
MazEF	0	0	0	0	0	0	0	0	0	0	0	0	0	0	0	0	0	0	0	0	0	0	0	0	0	0	0	0	0	0	0	0	0	0	0	0	0	0	0	0	0	0	0	0	0	0	0	0	0
Mokosh type II	0	0	0	0	0	0	0	0	0	0	0	0	0	0	0	0	0	0	0	0	0	0	0	0	0	0.318745	0	0.386927	0.67503	0.768239	0.822799	1.53596	0	0	1.33436	0.629538	0	0	0	0.302237	1.04883	0.228276	0	0.926043	0.438889	1.11699	1.98809	1.40735	0
NLR_like	0	0	0	0	0	0	0	0	0	0	0	0	0	0	0	0	0	0	0	0	0	0	0	0	0	0	0	0	0	0	0	0	0	0	0	0	0	0	0	0	0	0	0	0	0	0	0	0	0
PD-Lambda-1	0	0	0	0	0	0	0	0	0	0	0	0	0	0	0	0	0	0	0.62431	2.95762	4.37546	3.83333	1.44431	2.57185	0	0.280134	0	0	0.374735	0	0	0	0	0	0	0	0	0	0	0.317493	0	0.26504	0	0	0	0.889289	0.729263	0	0
PD-Lambda-5	0	0.337804	0	0	0	0	0.683235	0.474851	1.11741	0.822022	0	0.660686	1.38307	0.776501	0	1.02397	0.443132	0	0.370953	0	1.35774	0	0.643875	0.932183	0.34617	0.293535	0	2.38124	0.962065	1.16904	0.734762	1.3991	4.62892	0.796871	0.970905	0.61982	0.767773	0.466952	1.16676	0.897138	0.841691	0.947703	0	0	0.642632	1.06442	1.24185	0.778259	0.401356
PD-T4-10	0	0	0	0	0	0	0.330835	0	0	0	0	0	0	0.793906	0	1.76156	0.861105	0	0	0	0	0	0	0	0	0.327367	0	0	0	0	0.697508	0.660665	0	0	0.822085	0	0	0	0	0	0	0	0	0	0	0	0	0	0.495481
PD-T4-3	0	0	0	0.762847	0	2.4603	0.670503	1.33446	0	0.930811	0	1.33727	0	0	0	0	0	0	0	0	0	0	0	0	0	0	0	0	0.801715	2.18811	0	0	0	0.527864	0	1.12296	0	0	0	0	0	0	0	0	0	0.816477	1.17429	2.54271	0
PD-T4-6	0	0	0	0	0	0.909455	0.31797	0	0	0	0	0	0	0	0	0.480356	0	0	0	0	0	0	0.545573	0	0	0	0	0	0	0	0	0.421587	0	0	0.843448	0	0	0	0	1.56278	2.41361	2.32373	0	0	0.430665	2.47298	0	0	3.2844
PD-T4-9	0	0	0	1.44325	0	0.552307	0	0	0	0	0	0	0	0	0	0	0	0	0	0	0	0	0	0	0.536339	0	0	0.385114	0.351591	0	0	0	0	0	0	0	0	0	0	1.14146	0	0.389661	0	0	0	0	0.439092	0.653054	0
PD-T7-4	0	0	0	0	0	0	0	0	0	0	0	0	0	0	0	0	0	0	1.61457	0	0	0	0	0	0	0	0	0	0	0	0	0	0	0	0	0	0	0	0	0	0	0	0	0	0	0	0	0	0
PbeABCD	0	0	0	0	0	0	0	0	0	0	0	0	0	0	0	0	0	0	0	0	0	0	0	0	0	0	0	0	0	0	0	0	0	0	0	0	0	0	0	0	0	0	0	0	0	0	0	0	0
Pycsar	0	0	0	0	0	0	0.557373	0	0	0	0	0	0	0	0	0	0	0	0	0	0	0	1.65446	0	0	0	0	0	0	0	0	0	0	0	0	0	0.609978	0	0.719199	0.420292	1.57285	0.659301	0	0	0	0	0.294459	0	0
RM type I	19.833	16.2486	18.4398	10.5942	18.239	25.479441519999998	24.0699	15.465065679999999	18.1999	18.2828	22.5548	17.772337489999998	15.568829319999999	12.6675	3.7453	10.475	8.02216	11.6657	4.66026	7.99183	8.98287	0	17.9173	5.53639	9.75736	9.71796	5.17029	10.2033	10.6305	12.1504	13.1021	10.1589	12.1375	16.1144	24.3286	18.5166	10.0845	7.71251	14.369691979999999	18.112	15.6064	18.9521	2.99265	2.20274	5.56581	5.4036	11.6394	12.9869	10.8246
RM type II	40.9768	28.1491	37.1928	31.4157	40.1329	42.3772	47.3099	36.6165	24.3596	37.7827	42.3299	40.3448	34.4993	41.1701	46.2547	34.9636	34.3239	34.7154	11.9722	17.0008	22.0262	40.1237	48.147	39.6941	27.3202	26.9631	22.2219	27.4504	27.8459	30.3609	37.055486880000004	30.1715	51.2527	37.315956740000004	43.8326	46.6669	20.7938	20.9977	30.6492	28.244	23.4286	27.4765	17.598862529999998	21.0239	24.5677	29.5196	45.8564	43.646	39.1617
RM type II-2	5.38505	5.51094	3.36502	4.62799	4.63689	3.69695	5.77589	4.41732	4.97316	9.002968110000001	2.6552860000000003	7.02046	4.66287	4.51764	2.14962	3.70236	3.7882458999999997	3.01294	3.94808	5.54393	9.25046	1.4435170899999998	5.51061	18.5245	2.30314	2.49659	3.5960308999999997	3.76347	4.54154	3.57983	5.633	3.21438	4.1392948999999994	4.74409	6.95493	5.19431	5.762321399999999	6.08954	6.68191	5.8081	5.03744	3.9975679399999997	2.3246843999999998	3.21086	3.4054816800000003	3.0377	5.46879	5.31841	2.4495661999999996
RM type III	1.49246	2.06167	1.48311	3.67129	1.49811	4.88317	2.34016	1.14881	0	2.47262	2.18407	5.18005	1.47838	1.68959	1.4834	1.21542	1.27112	0.899361	7.51534	0.982933	0	0	0	0	2.86014	2.20258	1.1678	0.734586	0.446424	0.47785	1.13751	0.945047	1.26779	2.2270674900000005	2.9165349999999997	1.47377	2.5733702999999997	1.3555960599999999	2.2615372999999996	5.663144450000001	5.40732	10.7403	0	0.859093	0.8103918400000001	1.15192	1.28716	0.546	4.1131582799999995
RM type IV	7.0264074899999995	0	7.79617	0	8.46691	0	7.54662	0	6.28435	0.656783	12.7547	0	1.0811178099999998	2.3036	1.65857	2.6553544799999997	0.548401	0.642453	29.6359	5.804418790000001	0.378532	1.87441	2.6844	6.429170559999999	0	0.512135	0.646389	0.926648	0.583933	0	1.7382046999999998	1.56529	1.49215	1.7578723799999998	3.69062	1.249	1.09177	0.600493	2.68064	2.6799	1.62078	3.10696	0	0	0.738096	0	1.8752496699999999	0.931909	1.53207
RM type IV-1	0	0	0	0	0	0	0	0	0	0	0	0	0	0	0	0	0	0	0	0	0	0	0	0	0	0	0	0	0	0	0	0	0	0	0	0	0	0	0	0	0	0	0.768948	0.894763	0.826025	0	0	0	2.97092
Retron type XII	2.66427	0	0.929905	0	1.42565	0	1.11363	0	2.16054	0	1.07061	0	0	0	0	0	0	0	0	0	0	0	0	0	0	0	0	0	0	0	0	0	0	0	0	0	0	0	0	0	0	0	0	0	0	0	0	0	0
RloC	0	0	0	0	0	0	0	0	0	0	0	0	0	0	0	0	0	0	0	0	0	0	0	0	0	0	0	0	0	0	0	0	0	0	0	0	0	0	0	0	0	0.164668	0	0	0	0	0	0	0
RnlAB	0	0	0	0	0	0	0	0	0	0	0	0	0	0	0	0	0	0	1.15871	1.16945	1.67734	4.2501	2.49434	4.37386	1.51891	0.781791	1.02626	0	0	0	0	0	0	0	0	0	0	0	0.601282	0	0	0	1.40115	1.32952	1.11653	0	0	0	1.40412
RosmerTA	0	0	0	0	0	0	0	0.982986	0	1.06276	0	0.761178	0	0.477125	0	0.344201	0	0	4.12722	0.570801	10.1047	0	0	0	0	0.423918	0	0	0.426512	0	0	0	0	0	0	0	0	0	0	0.579835	0.408301	0.291242	0	0	0	0	0.250396	0	0.269826
SDIC3	0	0	0	0	0	0	0	0	1.27728	0	0	0	1.48683	0.54342	0	1.95268	2.28955	0.561127	0	0.656311	0.521448	0	0.874018	0	0	0	0	3.25767	2.5401456099999997	0	0	0	0	0.700789	1.56829	1.01514	0	0.648394	0.573796	1.27193	0.779163	1.67636	0	0	0	0.671824	1.8633755699999999	0	0.328632
SEFIR	0.432216	0.470393	0	0	0	0	0.885338	0	0	0	0	0	0	0	0	0.484801	0	0	0	0	0	0	0.525592	0	0	0.354491	0	0.41161	0.400263	0	0	0	0	0.72127	1.05155	0	0	0	0	1.39938	1.38796	0.78543	0	0	0	0	0.438489	0	0.257089
Septu	0	0	0	0.575836	0	0	0.773117	0.426174	0.656971	0.74316	0	0.601782	0.629228	0.984609	0	1.3047493799999998	0.604135	0.671698	3.43876	0.576951	1.47897	0	5.65815	1.31469	0	0.99161	1.4745	0	0	0	1.12539	0	0	0	1.36341	0.586005	1.62423	0	1.05876	1.40028	0.89551	0.580834	0	0	0	0	0	0	1.44908
ShosTA	0.403814	0	0	0	0	0.933859	1.01529	0	0	0	0.545969	0	0	0	0	0	0	0	0	0	0	0	4.52978	5.02567	0	0.558705	0	0.453272	0.424904	0.992163	0	0	0	0.675295	0	0	0	0	0.508322	0.608188	0	0.523626	0.596293	0	0	0	0.376132	0.924501	0
SoFic	4.86336	8.83855	10.3594	6.04765	7.16306	12.5156	8.71053	8.604888469999999	9.53626	6.4702863299999995	9.14443	6.22006	9.664520790000001	11.132487959999999	8.48244	9.27549	7.625417540000001	4.99948	5.36691	2.41326	4.39036	25.5186	7.8403826599999995	10.792318199999999	3.47276	5.88408	3.2169339900000002	9.327038400000001	11.184482169999999	12.735014289999999	13.347010130000001	13.8155	9.904693830000001	10.7839	10.0738	8.124122830000001	1.4951019799999998	2.49726	3.2201497700000004	9.61903	6.58518	9.08486	1.64941	2.2708958299999997	4.28088	7.61711	10.5866	10.4901	12.6436
SpbK	0	0	0	0	0	0	0	0	0	0	0	0	0	0	0	0	0	0	0	0	0	0	0	0	0	0	0	0	0	0	0	0	0	0	0	0	0	0	0	0	0	0	0	0	0	0	0	0	0
Sucellos	0	0	1.49723	0.83632	0.933972	0.869447	0.818217	0	0	0	0	0	0	0	0	0	0	0	2.00103	0.383056	0.500181	0	0	0	0	0	0	0	0	0	0	0	0	0	0	0	0	0	0	0	0	0	0	0	0	0	0	0	0
TgvAB	4.20275	0	0.967573	0	1.31312	0	1.4926	0	2.32439	0	1.55691	0	0	0	0	0	0	0	0	0	0	0	0	0	0	0	0	0	0	0	0	0	0	0	0	0	0	0	0	0	0	0	0	0	0	0	0	0	0
Thoeris type II	2.2094	0	2.88788	0	2.89244	0.931015	2.62074	0	1.92836	0	6.01383	0	0	0	0	0	0	0	0	0	0	0	0	0	0	0	0	0	0	0	0	0	0	0	0	0	1.08418	0	0.982223	1.43812	1.6842	2.86697	0	0	0	0	0.8936095500000001	0.878849	0
Thoeris type IV	1.64434	0.544674	0.848312	0	0.987306	0	1.78979	0.556835	0	1.43581	3.49436	0.510633	0	0.397337	0	0.748839	0.637739	0.516954	0	0	0.370681	0	0.814214	0	0.278005	0.337292	0.682659	0.288853	0.367711	0	0.880685	0.573393	0.37957	1.04064	0.939194	0.731916	0	0	0.551947	0.458011	0	0.269151	0	0	0	0	0.277504	0	0.427864
Tiamat	0.685131	0	0.691692	2.42756	0.474853	3.69755	1.14247	0.814025	0.775064	1.12358	0	0.898453	0	1.69653	0	1.14345	0.546363	0.502432	0	2.46875	0.984731	0	3.02689	0	0.267804	0.461581	1.01102	0.44663	0.482778	0	0	0	0	1.2269757700000001	0.91281	0.449537	0	0.643466	0.899107	1.26188	0	1.29649	0	0	0	0	0.350186	0	0.25616
Toutatis	0.321969	0	1.3927040499999999	0	2.13063	0	3.1608935899999997	0	2.83355	0	3.5157634499999997	0	0	0	0	0	0	0	0	0	0	0	0	0	0	0.1898	0	2.21094	1.60921	0.549334	0	0	0	0	0	0	0	0	0	0.425408	0	0.63847	0	0	0	1.15719	0.8644946600000001	0	0
UG17	0	0	0	0	0	0	0	0	0	0	0	0	0	0.254611	0	0	0	0.821392	0	0	0.846382	2.01618	0.356857	2.47256	0	0	0	0	0	0	0	0	0	0	0	0	0	0	0	0	0	0	0	0	0	0	0	0	0
UG27	9.51351	4.92165	3.56312	4.34611	5.0689565000000005	3.4591697999999997	8.27801	6.10405	5.70647	13.1312	2.58499	8.59882	7.62251	5.89174	4.32077	7.04432	9.94376	5.91592	2.91857	11.712	7.23363	1.87837	8.0207	3.94779	3.17311	3.22867	4.30296	4.02457	5.5282	4.25888	7.29205	5.06723	4.27618	9.12636	13.1678	7.30746	5.82227	5.10423	6.05731	6.809	6.79437	3.93903	3.5398680000000002	2.8108	3.34233	2.45567	3.64692	3.25921	5.42758
UG39	0	0	0	0	0	0	0	0	0	0	0	0	0	0	0	0	0	0	0	0	0	0	0	0	1.27829	0.618453	0	0	0	0	0	0	0	0	0	0.555984	0	0	0	0	0	0.313207	0.627647	0.564703	0.562035	0	0	0	0
Uzume	0.276103	0.895509	1.4601	5.71456	1.61462	0.751534	0.915267	0.916646	0.63089	2.07327	1.1769	2.03423	0	1.58362	0	0.722186	0	0	0	0	1.32659	0	0.732461	0	0	0.204793	0	0.928043	1.51993	0	0	0	0	0	0	0	1.23529	1.53599	1.2906	0	0	0	0.818042	0	0.375654	0	0.49086	0	0.295407
VP1817	0	0	0	0	0	0	0	0	0	0	0	0	0	0	0	0	0	0	4.82841	0.646534	0	0	0	0	0	0	0	0	0	0	0	0	1.53535	0	0	0	0	0	0	0	0	0	0	0	0	0	0	0	0
VP1826	0	0	1.61515	0	0.919153	0	0	0	0	0	0	0	1.3362	2.60515	3.1056486999999997	0.677235	0	3.78522	0	0	0.70252	0	0.318623	0	3.5435686000000004	2.13213	0.67951	0	0	0	0	0	2.5042657999999998	0	0	0	0.748511	2.92028	1.84068	0.78368	0	0.365276	2.06629	2.23913	2.35147	0.605468	0.502721	0	3.28044
VP1839	0	0	0	0	0	0	0	0	0	0	0	0	0	0.677338	0	0	0	0	3.63637	0.563545	0	0	0.825044	0	1.05496	2.5641727000000003	0.729584	0	0	0	2.88659	2.64223	9.79179	0	0	0	1.18039	1.51523	1.47417	0	0	0	0.979507	1.6232847499999998	1.8802203499999999	0	0	0	3.06058
VP1840	0	0.760059	0	0.675259	0	1.25708	0	0	0	0	0	0	0	0	0	0	0	0	0	0	0	0	0	0	1.18467	1.75775	1.24878	0.443385	0.564797	0.602611	0	0	0	0	0	0	0	0	0	0	0	0	0.904243	0.804619	0.856842	0.696873	0.552812	0.651535	0
VP1853	0	0	0	0	0	0.617145	0	0	0	0	0	0	0	0	0	0	0	0	0	0	0	0	0	0	1.39583	2.23452	1.03161	0	0.561599	0	0	0	0	0	0	0	0	0	0	0	0	0	1.52954	1.21593	1.1825	0	0.483701	0	0
Viperin solo	0	0	0	0	0	0	0	0	0	0	0	0	0.784525	3.33595	0	0	0	0	0	0	0	0	0	0	0	0	0	0	0	0	0	0	0	0	0	0	0	0	0	0	0	0	0	0	0	0	0	0	0
Zorya type I	0.664442	0.814745	0.846059	0.846323	0.925694	0.997972	0.833414	1.4361	0.79307	0.904539	0	0.879172	0	0	0	0	0	0	0	0	0	0	0	0	0.813809	0.786399	0	1.0653	1.0871	1.28303	0	0	0	0	0	0	0	0	0	0.355788	0	0.321672	1.23192	1.2789	1.15445	1.47615	1.95546	1.57269	0
gcu142	0	0	0	0	0	0	0	0	0	0	0	0	0	0	0	0	0	0	1.89678	0	0	0	0	0	0	0	0	0	0	0	0	0	0	0	0	0	0	0	0	0	0	0	0	0	0	0	0	0	0
gcu24	0	0	0	0	0	0	0	0	0	0	0	0	0	0	0	0	0	0	0	0	0	0	0	0	0	0	0	0	0	0	0	0	0	0	0	0	0	0	0	0	0	0	0	0	0	0	0	0	0
pAgo LongB	0	0	0	0	0	0	0	0	0	0	0	0	0	0	0	0	0	0	0	0	0	0	0	0	0	0	0	0	0	0	0	0	0	0	0	0	0	0	0	0	0	0	0.768948	0.894763	0.826025	0	0	0	2.97092
pAgo S1A	0.754065	0	0	0	0	0	0.370749	0	0	3.39691	0	0	0	0.311273	0.367943	0.527111	0	0	0	0	0.721221	0	0.930947	1.02261	0	0	0	0	0	0	0	0	0	0.574991	0.579059	0	0	0	0.553453	0.469733	0	0.285192	0	0	0	0	0.286327	0	0.314324
[truncated: 29 more columns]

## Sheet: Sheet6
Compartment		Genome Classification		Country
Group	Unique_Defense	Group	Unique_Defense	Group	Unique_Defense
BTP	Thoeris + ThsC	Chromosome	Belisama	DK	Butters gp57r
BTP	VP1796	Chromosome	Druantia type I	DK	Phrann gp29-gp30
BTP	SspFGH	Chromosome	gcu233	DK	UG33
BTP	Gasdermin	Chromosome	UG39	DK	Nemetona
BTP	CARD-NLR-like	Chromosome	Upx	DK	AbiI
BTP	ISG15-like	Chromosome	DdmDE	DK	gcu167
BTP	Druantia type IV	Chromosome	Butters gp57r	DK	Hydrolase-TM
HS	Phrann gp29-gp30	Chromosome	DRT type 5	DK	Lugos
HS	UG33	Chromosome	UG36	DK	DS-16
HS	gcuWGS21	Chromosome	Phrann gp29-gp30	DK	CARD-NLR-like
HS	DS-19	Chromosome	UG27	SP	DS-40
HS	AspAB	Chromosome	UG3	SP	DS-7
HS	Hydrolase-TM	Chromosome	DS-22	SP	UG14
HS	CAS_Class1-Type-IV	Chromosome	gcu76	SP	SspFGH
HS	AbiA	Chromosome	DS-19	SP	Gasdermin
HS	UG9_large	Chromosome	TIR-NLR	SP	SspABCD
HS	UG24	Chromosome	DRT type 7	SP	UG26
HS	DS-9	Chromosome	DS-39	SP	Veles
HS	AbiG	Chromosome	UG31	SP	CARD-NLR-Phospho
HS	SDIC1	Chromosome	HP	SP	Druantia type IV
HS	SDIC4	Chromosome	pAgo S1A	SP	PifAC
HS	SspABCD	Chromosome	PD-T4-10	SP	AbiK
HS	HsdR-like	Chromosome	UG9_small	UK	UG6
HS	Retron type VIII	Chromosome	Nemetona	UK	Thoeris + ThsC
HS	CARD-NLR-Phospho	Chromosome	UG13b	UK	AbiA
HS	PifAC	Chromosome	UG7	UK	UG9_large
HS	DS-28	Chromosome	TerY-P	UK	UG24
HS	RexAB	Chromosome	DS-11	UK	AbiG
MS	gcu167	Chromosome	UG22	UK	SDIC1
MS	Lugos	Chromosome	GAPS2	UK	SDIC4
MS	UG6	Chromosome	CRISPR-Cas type V	UK	pAgo type II
RS	DS-16	Chromosome	Retron type IX	UK	HsdR-like
RS	pAgo type II	Chromosome	Retron type XI	UK	Retron type VIII
RS	Veles	Chromosome	gcu142	UK	Hachiman type II
RS	Tin	Chromosome	Retron type XII	UK	Tin
RS	AbiR	Chromosome	DS-3	UK	AbiR
		Chromosome	AbiN	UK	DS-28
		Chromosome	gcu167	UK	Panchino gp28
		Chromosome	CAS_Class1-Type-IV	UK	RexAB
		Chromosome	Lamassu Hypothetical
		Chromosome	Lugos
		Chromosome	AVAST type I
		Chromosome	Wadjet type III
		Chromosome	UG1
		Chromosome	UG6
		Chromosome	Thoeris + ThsC
		Chromosome	PD-Lambda-6
		Chromosome	DS-40
		Chromosome	DS-7
		Chromosome	UG14
		Chromosome	VP1796
		Chromosome	VP1848
		Chromosome	Belenos
		Chromosome	Gasdermin
		Chromosome	DS-37
		Chromosome	PD-T4-1
		Chromosome	Pseudo-CoCoNut
		Chromosome	UG5_small
		Chromosome	DS-16
		Chromosome	UG9_large
		Chromosome	UG24
		Chromosome	DS-9
		Chromosome	AbiG
		Chromosome	SDIC1
		Chromosome	SDIC4
		Chromosome	pAgo type II
		Chromosome	SspABCD
		Chromosome	UG26
		Chromosome	Veles
		Plasmid	CARD-NLR-like
		Plasmid	Retron type VIII
		Plasmid	Lamassu FMO
		Plasmid	ISG15-like
		Plasmid	Hachiman type II
		Plasmid	DS-2
		Plasmid	CARD-NLR-Phospho
		Plasmid	Druantia type IV
		Plasmid	Tin
		Plasmid	AbiR
		Plasmid	PifAC
		Plasmid	DS-28
		Plasmid	Panchino gp28
		Plasmid	AbiK
		Plasmid	RexAB

## Sheet: Sheet7
GTDB_Species	DK_HS	DK_RS	DK_MS	DK_BTP	SP_HS	SP_RS	SP_MS	SP_BTP	UK_HS	UK_RS	UK_MS	UK_BTP	Mean_All	Mean_Sewage	Mean_BTB	log2_FC_Bio_vs_Pre	Enriched_Group	Group	Group2	GTDB_Domain	GTDB_Phylum	GTDB_Class	GTDB_Order	GTDB_Family	GTDB_Genus	RM type II	SoFic	PD-T4-6	RM type I	AbiE	RM type IV	CRISPR-Cas type I	MazEF	Septu	AbiD	RM type III	BREX type I	RM type II-2	Gabija	HEC-06	AbiL	PARIS type II	CRISPR-Cas type III	DarTG	PrrC
s__Acinetobacter johnsonii	9066.708520544167	14185.166979588334	9212.569759478332	30.183038604999997	36994.45258382666	19307.687792853332	22621.026218281662	243.1298252183333	64518.35619772666	34998.757963183336	14942.544514890002	568.3480733433333	18890.744288961596	25094.14117004139	280.5536457222222	-6.48293	Sewage	Opportunistic or Risk-associated	Human_related	d__Bacteria	p__Pseudomonadota	c__Gammaproteobacteria	o__Pseudomonadales	f__Moraxellaceae	g__Acinetobacter	223.959	341.262	0	348.183	0	136.948	0	0	146.174	0	0	0	0	211.398	0	146.942	0	0	0	109.901
s__Acidovorax temperans	20824.950564085	4863.7420949766665	3864.75	62.73872691666667	16612.6	14908	24469.3	639.228	13952.214716145	17486.974832814998	9466.9	1396.987636953333	10712.369348250972	14049.942005537963	699.6513763899999	-4.32778	NS	Unclassified	Unclassified	d__Bacteria	p__Pseudomonadota	c__Gammaproteobacteria	o__Burkholderiales	f__Burkholderiaceae_B	g__Acidovorax	2446.44	483.232	1823.2	519.979	0	46.0222	0	0	40.5753	112.995	452.826	11.4018	0	0	0	13.1478	0	0	0	8.07101
s__Aliarcobacter cryaerophilus_A	20948.18443631583	21802.731228716668	22186.353434235	61.11563577499999	8292.75	20601.22489768833	9684.065769461666	40.083176738333336	501.87707252166666	13694.285669131665	6626.284866903334	164.64905420333335	10383.633751754236	13815.306350481573	88.61595557222222	-7.28449	Sewage	Opportunistic or Risk-associated	Human_related	d__Bacteria	p__Campylobacterota	c__Campylobacteria	o__Campylobacterales	f__Arcobacteraceae	g__Aliarcobacter	6066.86	1253.4	0	40.8872	165.162	2502.18	0	1703.6	261.529	0	51.5814	0	1645.14	0	102.882	0	0	0	106.126	0
s__Aeromonas media	3413.29	12225.583495013334	21849.7	25.503	21836.697004861668	22222.451400765	4347.604099971667	56.496699076666665	6091.555788413333	13834.9	13410.4	1983.0889258133332	10108.109394340832	13248.024904610553	688.3628635316667	-4.26646	NS	Opportunistic or Risk-associated	Human_related	d__Bacteria	p__Pseudomonadota	c__Gammaproteobacteria	o__Enterobacterales_A	f__Aeromonadaceae	g__Aeromonas	19.3647	1103.21	0	643.187	0	169.553	0	0	20.1883	8.76056	9.60029	0	14.1777	0	0	0	0	0	0	116.019
s__Malikia spinosa	53.942909254166665	191.73431687666667	1269.0104262366667	29.201486309999996	98.07010613666664	295.63514463666667	649.0046784983333	56.12836445833333	137.63507789000002	285.34953384166664	47064.742956255	52345.293275815	8539.645689684097	5560.569461069537	17476.87437552778	1.6521426485084063	BTB	Unclassified	Unclassified	d__Bacteria	p__Pseudomonadota	c__Gammaproteobacteria	o__Burkholderiales	f__Burkholderiaceae_B	g__Malikia	644.757	4751.17	0	7200.63	19.4302	500.257	524.28	1336.18	877.015	10.4862	40.8148	1071.94	488.175	0	0	246.644	0	279.45	0	346.633
s__Aeromonas rivipollensis	1677.652651333333	7972.655988413334	11553.143452426666	10.126390463333331	12681.852380021666	13957.048903486668	3560.0591312766664	20.857717116666667	3529.3110912449997	13826.571983143667	9675.67	257.82905274833337	6560.231624131695	8714.885147694666	96.27105344277778	-6.50024	Sewage	Opportunistic or Risk-associated	Human_related	d__Bacteria	p__Pseudomonadota	c__Gammaproteobacteria	o__Enterobacterales_A	f__Aeromonadaceae	g__Aeromonas	0	239.717	0	22.5564	0	149.833	0	0	0	0	0	0	0	14.5928	0	0	0	0	0	322.536
s__Acidovorax defluvii	4397.6068922683335	12674.097599696666	11735.258346016666	373.2212942016667	1203.59	1889.5087150066663	4903.84	756.1523594016667	1489.4338062166669	16447.151000248334	13357.2	5857.373005081667	6257.034901274277	7566.408017400704	2328.92	-1.69995	BTB	Unclassified	Unclassified	d__Bacteria	p__Pseudomonadota	c__Gammaproteobacteria	o__Burkholderiales	f__Burkholderiaceae_B	g__Acidovorax	2919.37	2012.68	599.363	522.549	0	452.744	0	0	0	0	767.624	0	68.4274	31.8343	72.3802	0	0	49.6316	0	45.5034
s__Aliarcobacter suis	1663.984186723333	14110.933310348337	25513.753100290003	2.22923	189.654	2740.2108280766665	4583.678763997167	1.9345160183333336	18.0922	945.7399335848332	4116.252350206667	126.14609427166666	4501.050736997043	5986.922111362168	43.43661390166667	-7.10676	Sewage	Opportunistic or Risk-associated	Human_related	d__Bacteria	p__Campylobacterota	c__Campylobacteria	o__Campylobacterales	f__Arcobacteraceae	g__Aliarcobacter	252.163	507.826	217.032	61.3269	0	628.603	0	0	374.161	31.1604	219.99	0	0	0	0	339.633	0	0	0	0
s__Aeromonas salmonicida	1189.7446906091666	4053.55	6495.7269700100005	4.169718153333333	13096.980905553331	3018.27	594.2364636416667	19.9427	3951.09	9760.828963961669	4538.739978921667	198.13994970666667	3910.117729020625	5188.795596516944	74.08412653166667	-6.13009	Sewage	Opportunistic or Risk-associated	Human_related	d__Bacteria	p__Pseudomonadota	c__Gammaproteobacteria	o__Enterobacterales_A	f__Aeromonadaceae	g__Aeromonas	114.572	169.572	0	187.743	132.448	130.882	0	0	0	0	0	0	0	96.4719	0	0	0	0	0	0
s__Acinetobacter bohemicus	300.409	4459.31	6631.11	2.4903631633333334	638.6020115366667	4496.99	12736.462502303337	6.3241504100000006	2932.071086418333	4850.031325897667	9606.51	1016.9680681116666	3973.106618170917	5183.499648485111	341.9275272283333	-3.92216	NS	Opportunistic or Risk-associated	Human_related	d__Bacteria	p__Pseudomonadota	c__Gammaproteobacteria	o__Pseudomonadales	f__Moraxellaceae	g__Acinetobacter	2.50574	421.623	20.113	53.1568	0	301.354	266.339	0	167.484	41.9005	54.9618	0	0	0	81.3372	0	2.6781	0	0	0
s__Aliarcobacter acticola	1355.42	14177.472793545	16323.065654721666	6.077150601666666	274.5336435666667	963.8637417383334	805.4053764666666	1.9789451616666665	36.88060624833333	3328.4694300033334	4696.895965068333	140.24895380333334	3509.1931003691666	4662.445794984814	49.43501652222222	-6.55941	Sewage	Opportunistic or Risk-associated	Human_related	d__Bacteria	p__Campylobacterota	c__Campylobacteria	o__Campylobacterales	f__Arcobacteraceae	g__Aliarcobacter	129.746	853.582	0	358.135	818.576	707.706	0	169.63	524.789	73.6079	81.992	0	0	6.79224	19.7756	46.4965	0	8.76736	0	0
s__Aeromonas caviae	1260.2748107966668	4969.113847421667	4252.961303586667	3.0169587383333334	12907.656530486667	9020.774971391666	2809.097068836667	16.5417	603.9425412566667	1624.453620603333	1216.0712767666666	91.52423690166664	3231.2857425880543	4296.038441238518	37.02764663666665	-6.85826	Sewage	Opportunistic or Risk-associated	Human_related	d__Bacteria	p__Pseudomonadota	c__Gammaproteobacteria	o__Enterobacterales_A	f__Aeromonadaceae	g__Aeromonas	0	886.879	7.57701	19.6526	0	100.746	24.4462	0	0	0	44.7927	0	0	0	0	0	0	0	0	0
s__Aeromonas allosaccharophila	495.6751957166667	3140.905559093333	2785.350249111667	0.544404	14656.8	12853.499752696667	1359.3532160216666	5.103042221666667	821.9639338816668	1779.4486966351667	1507.7867807733337	74.6415	3290.090859040986	4377.866812632241	26.76299826722222	-7.35384	Sewage	Opportunistic or Risk-associated	Human_related	d__Bacteria	p__Pseudomonadota	c__Gammaproteobacteria	o__Enterobacterales_A	f__Aeromonadaceae	g__Aeromonas	0	94.2672	0	173.656	0	213.677	0	0	170.939	8.58455	0	0	0	15.3639	11.1807	0	0	0	0	0
s__Prevotella copri_B	3624.741968556667	3455.8095314766665	2498.6019207433333	0.2616964466666667	4615.239921743333	6447.26	2218.238640371667	0.8499376633333333	5300.735449593333	4856.844759378334	1729.0358343583332	29.49309670166667	2898.0930276206946	3860.723511181852	10.201576937222224	-8.56394	Sewage	Unclassified	Human_related	d__Bacteria	p__Bacteroidota	c__Bacteroidia	o__Bacteroidales	f__Bacteroidaceae	g__Prevotella	605.794	981.071	0	137.221	1433.7	276.19	0	0	2.65181	529.236	451.16	0	4.2023	2.65181	0	0	803.645	0	0	0
s__Comamonas denitrificans_A	7932.06	1956.67	1726.58	20.500076798333335	6585.545514286667	3855.633595678333	2483.73	86.22444782833334	386.2813782383334	2931.389293346667	1062.4185988883337	162.33276922166667	2432.447355868639	3213.3678862861484	89.68576461611111	-5.16306	Sewage	WWTP Core Functional	Non_Human_related	d__Bacteria	p__Pseudomonadota	c__Gammaproteobacteria	o__Burkholderiales	f__Burkholderiaceae_B	g__Comamonas	1225.65	279.635	274.923	395.761	111.799	12.5477	842.058	0	242.905	371.057	286.538	0	0	16.1429	15.9649	60.9143	0	0	0	66.5092
s__Faecalibacterium longum	2890.0584532183334	2420.8790391066664	1081.8764640133334	4.193140668333333	5286.8056840399995	6889.256183308334	1471.5504453583333	2.69999	3108.6244970616667	5543.964897214667	935.9519722266664	9.004696213333334	2470.405455457056	3292.1075150608895	5.2992766455555556	-9.279	Sewage	SCFA-producing fermenters	Human_related	d__Bacteria	p__Bacillota_A	c__Clostridia	o__Oscillospirales	f__Ruminococcaceae	g__Faecalibacterium	211.757	0	254.583	0	55.0296	6.78479	329.666	0	0	12.5338	98.5115	0	0	0	0	0	0	217.067	0	0
s__Zoogloea ramigera	1854.8584018116665	3696.5394930053335	3326.0596901783333	27.87792644166667	322.559	1724.7339504033334	12043.259009168332	33.877697704999996	107.46735790166667	340.54544534916664	1384.85	671.282	2127.8258080620412	2755.652495439759	244.34574592888893	-3.4954	NS	WWTP Core Functional	Non_Human_related	d__Bacteria	p__Pseudomonadota	c__Gammaproteobacteria	o__Burkholderiales	f__Rhodocyclaceae	g__Zoogloea	300.255	0	52.2015	372.47	35.709	107.197	485.907	0	75.1033	91.864	33.5565	51.2696	27.4615	0	0	0	0	178.858	0	18.2952
s__Faecalibacterium prausnitzii	1993.3892473041667	1829.7820603833336	812.3911521616668	0.1154881616666666	4417.362189478333	5490.659348443333	1384.3372891666666	1.2726594433333334	2094.62	5514.073175906667	993.704	8.19544	2044.9914738353464	2725.5904549749066	3.1945304166666664	-9.73675	Sewage	SCFA-producing fermenters	Human_related	d__Bacteria	p__Bacillota_A	c__Clostridia	o__Oscillospirales	f__Ruminococcaceae	g__Faecalibacterium	110.362	0	227.16	3.7216	0	0	0	0	0	0	0	0	0	0	0	0	0	0	0	0
s__Agathobacter rectalis	2417.45	3168.254730576666	1126.516986588333	0.0961309266666666	3766.26	4252.391199883333	1173.1658806633334	0.8843603683333333	2889.807700173333	4133.306229425833	1005.2171880716668	6.989021326666666	1995.0284004474304	2659.152365860833	2.656504207222222	-9.96722	Sewage	SCFA-producing fermenters	Human_related	d__Bacteria	p__Bacillota_A	c__Clostridia	o__Lachnospirales	f__Lachnospiraceae	g__Agathobacter	0	88.6684	72.5048	94.4368	361.043	16.1168	242.47	0	0	116.754	0	0	0	0	0	60.9006	0	0	0	0
s__Rivicola pingtungensis	1800.8113312750002	189.368	379.06719047166666	3.815608365000001	7597.407666978334	5273.984803073333	5570.118237658833	15.440811266666666	2309.4401004883334	43.6335	292.77054989333334	11.761656848333333	1957.3016346165696	2606.2890598798704	10.339358826666668	-7.97771	Sewage	Unclassified	Unclassified	d__Bacteria	p__Pseudomonadota	c__Gammaproteobacteria	o__Burkholderiales	f__Aquaspirillaceae	g__Rivicola	719.202	686.676	88.8972	331.087	148.483	0	908.343	473.121	749.871	347.213	131.14	0	0	0	0	13.1758	0	44.1519	182.18	231.056
s__Faecalibacterium duncaniae	1893.24	1790.1947402803332	640.3405020016667	1.3693384366666663	3411.91	4812.341207568334	1190.3481546016667	1.8972783183333333	2257.0749986783335	5928.59	913.806	12.5104	1904.4686468366945	2537.5385220250373	5.259021271666667	-8.91442	Sewage	SCFA-producing fermenters	Human_related	d__Bacteria	p__Bacillota_A	c__Clostridia	o__Oscillospirales	f__Ruminococcaceae	g__Faecalibacterium	269.532	240.175	148.133	0	0	24.9001	0	0	31.5387	61.5852	0	0	18.3774	0	36.7556	0	0	0	41.6771	0
s__Faecalibacterium prausnitzii_D	2157.517648345833	2022.99	966.4940425733332	1.93161	3513.1329941266667	4869.571163588334	1368.1573228366667	2.710669541666667	1468.562712873333	4901.694640956666	802.1927506349999	11.629232316666666	1840.548439165764	2452.256639948426	5.4238368177777785	-8.82058	Sewage	SCFA-producing fermenters	Human_related	d__Bacteria	p__Bacillota_A	c__Clostridia	o__Oscillospirales	f__Ruminococcaceae	g__Faecalibacterium	31.5062	17.9605	230.746	0	0	86.6655	0	0	0	41.2534	0	0	0	0	22.3465	0	0	0	0	0
s__Janthinobacterium tructae	6036.759762423332	1638.9282114033333	2100.14	4.270083025000001	205.35	439.4190444883333	707.625	1.2677866266666666	2214.201348761667	159.40017795666665	3922.6583109866665	37.397215646666666	1455.6176592090276	1936.052980578889	14.311695099444444	-7.07978	Sewage	Unclassified	Unclassified	d__Bacteria	p__Pseudomonadota	c__Gammaproteobacteria	o__Burkholderiales	f__Burkholderiaceae	g__Janthinobacterium	0	18.0054	20.2159	0	0	0	0	0	0	0	0	16.6898	0	0	0	0	0	0	0	0
s__Aeromonas hydrophila	466.0210256358334	1845.5254746916664	955.6022159516666	2.0100705283333333	11766.7	3036.635296748333	651.4154022466668	4.127855741666667	3107.7660021083334	454.61056410300006	396.8740520283333	22.87484993833333	1892.511023316014	2520.1243892870925	9.670925402777778	-8.02563	Sewage	Opportunistic or Risk-associated	Human_related	d__Bacteria	p__Pseudomonadota	c__Gammaproteobacteria	o__Enterobacterales_A	f__Aeromonadaceae	g__Aeromonas	0	0	1.9864	0	0	0	0	0	0	0	0	0	0	0	0	0	0	0	0	0
s__Neisseria suis	6384.795200144999	1254.21	1946.5938528783336	1.4941437183333333	792.0421661533334	1686.341352728333	401.21462520533333	8.825521591666666	26.22695155166667	3188.6841931833333	518.6441657266666	5.18687	1351.18836500475	1799.861538811889	5.1688435833333335	-8.44383	Sewage	Opportunistic or Risk-associated	Human_related	d__Bacteria	p__Pseudomonadota	c__Gammaproteobacteria	o__Burkholderiales	f__Neisseriaceae	g__Neisseria	418.784	214.511	0	145.13	0	19.0193	339.001	0	0	137.246	47.8952	0	14.1512	66.8941	49.8875	11.4573	0	395.516	0	0
s__Acinetobacter parvus	2981.5420869366667	1427.43	1025.8751178133334	0.3519365516666666	2798.081329166667	2324.92	4073.3083768415	5.575587421666667	2329.718583213333	1694.4829888453332	589.65	301.412	1629.3629883841809	2138.3351180674263	102.44659933444444	-4.38354	NS	Opportunistic or Risk-associated	Human_related	d__Bacteria	p__Pseudomonadota	c__Gammaproteobacteria	o__Pseudomonadales	f__Moraxellaceae	g__Acinetobacter	45.1309	154.014	0	0	0	0	104.718	0	0	37.5696	0	0	0	0	22.4289	14.5691	0	288.409	0	0
s__Aliarcobacter cryaerophilus_B	3017.64	3807.334984181666	4250.6103695033335	4.61946	991.624	2613.697168346667	1169.33	2.7383054933333333	43.166464100000006	2351.007331456666	1093.01	16.465697618333333	1613.4377269883332	2148.6032512509255	7.941154200555555	-8.07983	Sewage	Opportunistic or Risk-associated	Human_related	d__Bacteria	p__Campylobacterota	c__Campylobacteria	o__Campylobacterales	f__Arcobacteraceae	g__Aliarcobacter	443.779	1570.07	0	90.966	121.684	708.77	0	20.6382	40.58	0	0	32.7908	720.951	51.225	122.914	0	0	0	41.9219	0
s__Bacteroides uniformis	2566.3254656066665	1674.7144472250002	1201.88	1.23836	2754.1854748916667	3162.5631750650005	912.8254431618334	0.1396902066666666	2729.83	3710.702342029166	933.6542457866668	9.182163811666667	1638.102624312861	2182.963475679556	3.520070212777778	-9.27647	Sewage	SCFA-producing fermenters	Human_related	d__Bacteria	p__Bacteroidota	c__Bacteroidia	o__Bacteroidales	f__Bacteroidaceae	g__Bacteroides	258.025	385.33	452.013	0	25.1425	0	0	0	0	0	0	0	0	0	0	0	521.999	0	0	0
s__Phocaeicola dorei	2465.9189886766667	1725.26	1133.4433196816667	0	2576.98	3087.69	813.1471652433333	0.2217427466666666	2820.5324045016664	3535.1202979583336	957.6686593933332	21.992	1594.8308195243055	2123.972895973889	7.404590175555556	-8.16413	Sewage	SCFA-producing fermenters	Human_related	d__Bacteria	p__Bacteroidota	c__Bacteroidia	o__Bacteroidales	f__Bacteroidaceae	g__Phocaeicola	28.2402	229.94	0	498.518	0	0	51.579	0	0	0	99.5546	0	0	0	0	0	189.229	0	0	0
s__Acinetobacter rongchengensis	1027.8546020158333	1405.7533772633333	1240.93	13.6465	2781.8488526716665	1375.4025154166666	2393.6082158833333	29.8878	5327.71	2743.57	2002.9955136366668	188.59759427166668	1710.9838720774303	2255.5193974869444	77.37729584888889	-4.86541	Sewage	Opportunistic or Risk-associated	Human_related	d__Bacteria	p__Pseudomonadota	c__Gammaproteobacteria	o__Pseudomonadales	f__Moraxellaceae	g__Acinetobacter	617.882	12.9871	0	0	0	0	0	41.7915	0	9.89999	0	0	0	26.7211	0	0	0	0	0	0
s__Bacteroides_I graminisolvens	4596.144377928334	3399.23	3197.503581956667	0.226524	386.849	1892.58	1580.691585353333	0	25.393990641666665	294.45318126999996	506.4364383183334	5.953744105000001	1323.7888839431946	1764.3651488014816	2.0600893683333337	-9.74223	Sewage	SCFA-producing fermenters	Human_related	d__Bacteria	p__Bacteroidota	c__Bacteroidia	o__Bacteroidales	f__Bacteroidaceae	g__Bacteroides_I	246.265	1424.1	0	47.5663	668.653	149.832	54.1017	0	0	192.55	160.191	0	24.8621	0	0	349.719	222.04	0	0	58.7442
s__Phosphoribacter hodrii	12.183254698333334	17.797664925000003	5.313550703333333	18146.446964251667	0.4236724366666667	0.0974056	6.09243	2119.673256951666	25.977102703333333	4.2510093683333325	1.746161353333333	4.0284703933333335	1695.3359122533332	8.209139493703702	6756.716230532221	9.684875548015423	BTB	Unclassified	Unclassified	d__Bacteria	p__Actinomycetota	c__Actinomycetia	o__Actinomycetales	f__Dermatophilaceae	g__Phosphoribacter	0	265.847	433.099	192.289	249.18	50.6189	0	0	0	112.143	0	0	0	0	0	0	0	0	89.2818	0
s__Aliarcobacter caeni	627.595	3707.99	8868.850376078333	6.362663591666666	85.21818377166666	1048.5891253533334	1303.2603827516666	3.137682871666667	16.328789349999997	827.5045646335001	2736.3312020216667	155.06737250833334	1615.5193109064028	2135.7404457672405	54.85590632388889	-5.28295	Sewage	Opportunistic or Risk-associated	Human_related	d__Bacteria	p__Campylobacterota	c__Campylobacteria	o__Campylobacterales	f__Arcobacteraceae	g__Aliarcobacter	140.384	214.775	3.2326	28.0156	31.2457	146.937	0	0	240.007	0	0	0	157.979	37.3016	0	0	0	0	0	0
s__Acinetobacter kyonggiensis	479.5957935508333	1658.0213927933337	1635.5901769733334	3.1703869766666664	1621.6661307116667	1764.499472923333	3098.5143093416664	14.828505276666666	3356.66	2692.203068856667	2919.96	263.531	1625.6870200999304	2136.3016407156483	93.84315825277776	-4.50872	NS	Opportunistic or Risk-associated	Human_related	d__Bacteria	p__Pseudomonadota	c__Gammaproteobacteria	o__Pseudomonadales	f__Moraxellaceae	g__Acinetobacter	290.384	470.545	0	11.3447	87.3009	54.1177	21.846	28.5326	20.1871	95.2632	0	0	0	0	0	0	8.97027	0	0	0
s__Macellibacteroides fermentans	4568.743339688333	2969.4621094196664	2811.433206483334	0.1088688383333333	67.39498351366666	1536.48	2065.9803772716664	2.8846123766666665	6.188415691666666	321.6266727308334	658.2760807266667	11.545623591666669	1251.677255393958	1667.2875511023149	4.846368268888889	-8.42638	Sewage	Unclassified	Unclassified	d__Bacteria	p__Bacteroidota	c__Bacteroidia	o__Bacteroidales	f__Tannerellaceae	g__Macellibacteroides	88.4296	158.032	5.83567	0	276.577	6.80982	0	0	67.0523	5.42032	17.4236	43.1441	8.40328	0	0	150.15	112.645	0	0	0
s__Aliarcobacter cryaerophilus	2530.82	3436.7282619133334	3727.9117294983334	3.9430999366666666	784.533	2161.8076688833335	898.71	3.3419914533333333	35.3239	2312.5308011133334	1020.9805887283334	16.789429313333333	1411.1180842683332	1878.8158322796296	8.024840234444445	-7.87114	Sewage	Opportunistic or Risk-associated	Human_related	d__Bacteria	p__Campylobacterota	c__Campylobacteria	o__Campylobacterales	f__Arcobacteraceae	g__Aliarcobacter	129.828	197.559	0	50.889	124.788	1238.93	0	0	178.67	85.6237	0	0	0	8.75741	197.37	0	0	0	16.3835	0
s__Aliarcobacter cibarius	1817.6074030775	4067.3193599366664	4771.8253937183335	4.158316184999999	828.3306907599999	2231.567614833333	1215.9048509816666	1.2601637283333331	30.365798588333337	1490.922258673333	981.4402570133334	22.511443251666662	1455.2677958956249	1937.253736398056	9.309974388333332	-7.70102	Sewage	Opportunistic or Risk-associated	Human_related	d__Bacteria	p__Campylobacterota	c__Campylobacteria	o__Campylobacterales	f__Arcobacteraceae	g__Aliarcobacter	182.388	0	0	112.402	4.20398	0	0	0	27.7304	0	11.5313	0	0	0	0	32.9726	0	0	0	0
s__Phocaeicola vulgatus	1935.7620832783336	1515.27	1025.2	0.0610858783333333	2214.645262013333	2921.54	783.8845220566667	0.6534568883333333	2475.33	3176.679970243333	929.335	22.156533516666663	1416.7099114933333	1886.4053179596297	7.6236920944444435	-7.95093	Sewage	SCFA-producing fermenters	Human_related	d__Bacteria	p__Bacteroidota	c__Bacteroidia	o__Bacteroidales	f__Bacteroidaceae	g__Phocaeicola	0	122.767	0	217.058	111.46	0	0	0	605.744	367.312	0	0	0	0	283.632	169.269	0	0	0	0
s__Gemmiger formicilis	2109.132477064167	1446.8980490366666	460.38833042833335	0.8276828216666666	2973.2609366033334	3310.8343541199997	499.976	2.8769808833333332	1754.7332971566668	3478.5707517433334	358.685	16.297029416666664	1367.7067439274306	1821.3865815563888	6.667231040555554	-8.09373	Sewage	SCFA-producing fermenters	Human_related	d__Bacteria	p__Bacillota_A	c__Clostridia	o__Oscillospirales	f__Ruminococcaceae	g__Gemmiger	0	0	167.648	0	27.1116	72.7883	0	0	0	20.4974	0	0	0	0	0	0	0	0	0	0
s__Cloacibacterium caeni_A	3154.102899331667	1647.89	1312.29	0.6950302700000001	1089.38	1598.5202816266665	4201.24	1.03433	101.57835614333334	651.8343710933333	346.44213203333334	12.769199596666668	1176.4815180266664	1567.0310728337035	4.832853605555556	-8.34094	Sewage	WWTP Core Functional	Non_Human_related	d__Bacteria	p__Bacteroidota	c__Bacteroidia	o__Flavobacteriales	f__Weeksellaceae	g__Cloacibacterium	291.167	131.435	0	30.6891	5.64832	17.4815	0	0	0	20.6672	0	0	68.0356	7.17212	19.226	29.9047	0	0	0	0
s__Pseudomonas_E alcaligenes	2762.92	2466.9440815616667	1499.9933725616663	1.88817	2363.633361313334	1629.9221100766665	1229.8	14.835991906666663	1384.0304547616668	474.9972853916667	250.943	139.66889202666667	1184.9649567301667	1562.5762701365186	52.13101651111111	-4.90564	Sewage	Unclassified	Unclassified	d__Bacteria	p__Pseudomonadota	c__Gammaproteobacteria	o__Pseudomonadales	f__Pseudomonadaceae	g__Pseudomonas_E	0	0	16.1544	0	0	0	0	0	0	0	0	0	0	0	0	0	0	0	0	0
s__Azonexus phosphorivorans	81.05003979583333	1105.78	1268.16	7074.985454434999	28.810565765000003	57.82963293833333	245.267	257.58372722999997	20.5721	259.63202714666664	2449.73	3709.181446338333	1379.8813265478054	612.9805878411481	3680.5835426677777	2.586021226479462	BTB	Unclassified	Unclassified	d__Bacteria	p__Pseudomonadota	c__Gammaproteobacteria	o__Burkholderiales	f__Rhodocyclaceae	g__Azonexus	212.035	121.419	132.49	195.773	0	0	0	0	7.9364	0	43.2152	0	0	0	0	0	0	0	0	0
s__Acinetobacter celticus	70.87360901916666	2382.15	2247.01	0.263072	179.203	145.35209639833332	521.826	1.3067692883333333	220.40790212333337	3736.6031249483335	6783.207612856667	50.72241075333333	1361.5767737667918	1809.6254481483147	17.43075062222222	-6.69791	Sewage	Opportunistic or Risk-associated	Human_related	d__Bacteria	p__Pseudomonadota	c__Gammaproteobacteria	o__Pseudomonadales	f__Moraxellaceae	g__Acinetobacter	60.7318	0	0	0	0	0	0	0	0	0	0	0	0	0	0	0	32.1199	0	0	0
s__Thauera phenylacetica	5549.719707381667	1666.9152173900002	1366.47	33.841794703333335	377.453	443.0032160683333	369.0400389116666	17.526409623333333	413.23103327333337	370.8291052273333	91.9983	21.442749421666665	893.4562258868054	1183.1848618770368	24.27031791611111	-5.60734	Sewage	WWTP Core Functional	Non_Human_related	d__Bacteria	p__Pseudomonadota	c__Gammaproteobacteria	o__Burkholderiales	f__Rhodocyclaceae	g__Thauera	40.5002	502.949	99.5058	167.053	0	14.4213	47.4331	53.3557	42.8706	0	0	0	58.4381	0	0	0	0	83.9806	0	0
s__Aliarcobacter vandammei	1897.19	2965.3398826683333	3584.65	3.0624225566666663	706.416	1806.3433521550005	779.143	1.0381665183333333	26.206172213333332	1596.7726305433334	840.3409424750001	18.0704	1185.3812914179168	1578.04	7.390339791666666	-7.73828	Sewage	Opportunistic or Risk-associated	Human_related	d__Bacteria	p__Campylobacterota	c__Campylobacteria	o__Campylobacterales	f__Arcobacteraceae	g__Aliarcobacter	9.54656	111.718	0	657.6	0	1752.44	0	0	51.9504	12.7483	35.2822	0	0	0	26.624	0	0	30.3993	0	0
s__Aliarcobacter venerupis	433.40163369916667	4137.38	7716.08	0.165197	34.766973183333334	593.601	1084.5657030116663	1.07516	4.775874053333333	283.40727344116664	1159.067648728333	33.28817673166667	1290.1308319511388	1716.3379389652223	11.50951090888889	-7.22036	Sewage	Opportunistic or Risk-associated	Human_related	d__Bacteria	p__Campylobacterota	c__Campylobacteria	o__Campylobacterales	f__Arcobacteraceae	g__Aliarcobacter	97.9405	1233.6	0	65.4813	0	35.8145	0	0	340.677	0	21.2452	0	0	0	0	15.9281	0	0	0	0
s__Flavobacterium cheniae	1555.74	3478.4218241216663	2513.6	0.1087156566666666	511.6656926983333	121.98716123666668	792.7179655350001	3.322862633333333	244.37145511000003	1821.9436893883333	1965.8356740816664	1170.35	1181.672639280972	1445.142926016852	391.26177907333334	-1.88501	BTB	Unclassified	Unclassified	d__Bacteria	p__Bacteroidota	c__Bacteroidia	o__Flavobacteriales	f__Flavobacteriaceae	g__Flavobacterium	0	36.6991	0	0	0	0	0	0	0	0	0	0	0	0	0	0	0	0	0	0
s__Giesbergeria metamorpha	933.9082724008334	3567.030214701667	2115.63	27.333434808333333	266.94415723133335	339.0473262916667	2372.4	127.07331641166668	61.8504	950.349	3160.15	610.8321228566667	1211.0452099743472	1529.700405068389	255.07962469222227	-2.58423	BTB	WWTP Core Functional	Non_Human_related	d__Bacteria	p__Pseudomonadota	c__Gammaproteobacteria	o__Burkholderiales	f__Burkholderiaceae_B	g__Giesbergeria	467.303	183.252	96.6119	26.8296	50.0365	39.0279	169.295	0	59.9961	59.0126	0	0	14.0149	0	50.7899	59.2884	0	0	0	60.2745
s__Acidovorax_C caeni	3347.9912401408333	488.642	370.92342691666664	31.826001716666667	3034.248522258333	1218.6433136566666	1678.8114420266666	93.67459388833332	564.428	371.2421200666667	373.7542133683334	281.5451244866667	987.9775110184028	1272.0760457921294	135.68190669722222	-3.22888	NS	Unclassified	Unclassified	d__Bacteria	p__Pseudomonadota	c__Gammaproteobacteria	o__Burkholderiales	f__Burkholderiaceae_B	g__Acidovorax_C	19.1651	9.89111	42.8539	0	0	0	0	0	0	0	0	0	40.6678	0	0	16.5985	0	0	0	0
s__Thauera terpenica	2665.659543041667	2346.68	1237.0752878133333	37.80445523666666	1583.17	470.2864233266667	316.547	80.29278342333333	1235.266135566667	1820.1882609675	301.64975848166665	69.6139	1013.6864023927084	1330.725073040278	62.57039044999999	-4.41059	NS	WWTP Core Functional	Non_Human_related	d__Bacteria	p__Pseudomonadota	c__Gammaproteobacteria	o__Burkholderiales	f__Rhodocyclaceae	g__Thauera	16.473	89.9099	137.202	100.478	116.664	0	41.4914	0	0	22.636	0	0	0	0	0	0	0	4.9457	21.8329	0
s__Klebsiella pneumoniae	55.6051	101.48525818000002	1033.56	0.9663501616666668	1292.43	125.286	23.472712806666667	1.8582726433333336	10620.204665676669	657.7276868316667	38.523	3.9486825316666665	1162.922525458264	1549.8107777958337	2.2577684455555556	-9.42298	Sewage	Opportunistic or Risk-associated	Human_related	d__Bacteria	p__Pseudomonadota	c__Gammaproteobacteria	o__Enterobacterales	f__Enterobacteriaceae	g__Klebsiella	0	15.6917	0	159.442	0	0	157.384	0	0	0	0	0	0	159.442	0	0	0	0	0	0
s__Aliarcobacter skirrowii	1799.7577682425	2250.15	2468.9349026633336	2.934249463333334	612.6182150066667	1602.4697307666663	707.7325935383333	0.7875986033333334	28.4273	1382.8521076496666	629.3805425366667	7.174001006666667	957.768444392264	1275.813942625981	3.631949691111111	-8.45646	Sewage	Opportunistic or Risk-associated	Human_related	d__Bacteria	p__Campylobacterota	c__Campylobacteria	o__Campylobacterales	f__Arcobacteraceae	g__Aliarcobacter	265.669	296.762	0	0	294.484	118.219	0	0	0	45.3153	130.085	0	416.983	0	30.1719	0	0	202.632	80.7307	0
s__Thermomonas carbonis	303.98870270083336	239.54811222333333	119.142	793.0887101916666	7.894894038333334	6.591877183333334	11.285617988333334	4509.479752158334	14.625161911666666	264.4532124666667	500.36925408166667	5727.22	1041.4735588990973	163.0998718060185	3676.5946201783336	4.4945425611086565	BTB	WWTP Core Functional	Non_Human_related	d__Bacteria	p__Pseudomonadota	c__Gammaproteobacteria	o__Xanthomonadales	f__Xanthomonadaceae	g__Thermomonas	0	31.2665	84.8412	0	15.4288	0	0	0	0	0	9.7455	0	0	0	5.22375	0	0	0	0	0
s__Zoogloea oleivorans	153.22821402583335	1508.7630505766665	1767.5908252083334	26.30210101333333	146.84235413666667	259.21438127666664	5607.46	58.78036908166667	241.90158655999997	136.735	1005.06	1678.31	1049.182161867014	1202.977236433241	587.7969381683333	-1.03322	BTB	WWTP Core Functional	Non_Human_related	d__Bacteria	p__Pseudomonadota	c__Gammaproteobacteria	o__Burkholderiales	f__Rhodocyclaceae	g__Zoogloea	7.77464	164.741	25.3316	20.2108	0	11.9727	80.6195	0	32.7577	0	0	21.6097	0	0	0	30.2405	0	0	0	0
s__Aeromonas simiae	416.85693004416663	1080.7047258283333	1580.27	4.89855	2966.704380001667	2654.474128696667	512.0819733133334	13.1072	521.389	1269.31	976.905	115.781	1009.3732335078474	1330.9658020187965	44.5955	-4.89943	Sewage	Opportunistic or Risk-associated	Human_related	d__Bacteria	p__Pseudomonadota	c__Gammaproteobacteria	o__Enterobacterales_A	f__Aeromonadaceae	g__Aeromonas	1.80035	0	0	564.593	12.9416	242.155	0	84.0403	179.811	0	34.9979	0	0	0	0	0	0	0	0	0
s__Parabacteroides distasonis	1494.4893641925	758.9351729966667	337.68313477500004	0.7255531083333334	2026.26	1895.0389189816667	265.25754457883335	0.718437	1816	2322.6192610466665	63.98678325333333	2.3739624733333335	915.3406879905276	1220.0300337116294	1.2726508272222223	-9.90486	Sewage	SCFA-producing fermenters	Human_related	d__Bacteria	p__Bacteroidota	c__Bacteroidia	o__Bacteroidales	f__Tannerellaceae	g__Parabacteroides	208.958	0	0	0	0	0	55.9625	0	0	0	0	0	0	0	0	22.0037	84.7534	0	0	0
s__Phocaeicola plebeius_A	527.849	189.685	108.48427687666668	0	3703.91	4857.652560763333	1209.7317808816667	0.6306428833333334	312.01360800500004	179.83159643666667	50.24614285166667	2.1104830383333333	928.5117938372222	1237.711155569444	0.9137086405555556	-10.4037	Sewage	SCFA-producing fermenters	Human_related	d__Bacteria	p__Bacteroidota	c__Bacteroidia	o__Bacteroidales	f__Bacteroidaceae	g__Phocaeicola	129.874	210.149	0	127.947	0	67.2473	0	0	0	0	0	0	0	0	0	28.6536	64.7958	0	0	0
s__Faecalibacterium prausnitzii_J	1119.6934419458332	971.9990232716668	435.729	0.0380436633333333	1665.9537827283332	2223.1235525633333	492.2979939033333	7.07111	865.0419239633334	2333.0777822883333	391.2469672316667	3.60436	875.739779165764	1166.4626482856484	3.5711718061111113	-8.35153	Sewage	SCFA-producing fermenters	Human_related	d__Bacteria	p__Bacillota_A	c__Clostridia	o__Oscillospirales	f__Ruminococcaceae	g__Faecalibacterium	0	35.7909	0	0	0	59.2196	0	0	0	0	0	0	0	0	0	0	0	0	0	0
s__Blautia_A faecis	1085.135224033333	1536.3763034566666	439.59	0.0694495	1422.6884181976666	2074.9	165.66281255333334	0	1763.1460834583334	1671.5764172443332	230.37174436833337	2.940556153333333	866.0376976483609	1154.382485125222	1.0033352177777777	-10.1681	Sewage	SCFA-producing fermenters	Human_related	d__Bacteria	p__Bacillota_A	c__Clostridia	o__Lachnospirales	f__Lachnospiraceae	g__Blautia_A	18.9546	24.0103	196.941	0	0	0	0	0	0	0	0	0	0	0	0	0	0	0	0	0
s__Bacteroides thetaiotaomicron	1876.2680388825	1055.8149008088333	473.5777343183333	0.0910211316666666	1501.5331565821668	1107.5168256516663	271.9309749916667	1.3853968233333334	2216.922497566667	797.1481765208333	198.14400071666668	5.17486	792.1256320399444	1055.4284784488148	2.2170928133333336	-8.89494	Sewage	SCFA-producing fermenters	Human_related	d__Bacteria	p__Bacteroidota	c__Bacteroidia	o__Bacteroidales	f__Bacteroidaceae	g__Bacteroides	109.89	7.25418	0	14.965	0	0	0	0	0	0	0	0	0	0	0	0	28.3978	0	0	0
s__Trichococcus flocculiformis	1006.3757880866668	3939.852308033333	3975.4329399066664	0.957888	13.6095	7.807454070000001	5.691488280000001	0	5.582496101666667	785.1880278566667	578.023	1.9446773366666663	860.0387974201388	1146.395889251111	0.9675219272222222	-10.2105	Sewage	WWTP Core Functional	Non_Human_related	d__Bacteria	p__Bacillota	c__Bacilli	o__Lactobacillales	f__Aerococcaceae	g__Trichococcus	50.4664	207.305	0	120.085	89.2248	37.1173	19.1461	152.961	0	136.967	13.4177	0	0	0	14.2505	133.966	0	0	0	0
s__Cloacibacterium caeni_B	1872.8468068883333	894.6781202400001	734.1674464900001	0	799.1017639966667	1067.6168013033332	3066.3547242500003	1.7330094233333335	97.51838325166666	382.5260463161667	219.97446915500004	13.465294468333331	762.4985721485695	1014.976062432352	5.066101297222222	-7.64635	Sewage	WWTP Core Functional	Non_Human_related	d__Bacteria	p__Bacteroidota	c__Bacteroidia	o__Flavobacteriales	f__Weeksellaceae	g__Cloacibacterium	435.909	232.771	0	101.804	28.1598	100.3	0	0	14.9888	0	0	0	0	33.8943	55.1439	18.0778	0	0	30.7148	0
s__Pseudomonas_E anguilliseptica_A	547.2368142166666	3176.2706247500005	914.95	2.6523359566666667	386.45589872833335	411.033	375.0224662886667	3.694329646666666	716.7413904966667	3212.0490788266666	604.0172742883334	66.43028480166667	868.0461096329445	1149.308485021148	24.258983468333337	-5.5661	Sewage	Opportunistic or Risk-associated	Unclassified	d__Bacteria	p__Pseudomonadota	c__Gammaproteobacteria	o__Pseudomonadales	f__Pseudomonadaceae	g__Pseudomonas_E	0	0	0	0	0	0	0	0	0	0	0	0	0	4.23198	0	0	0	0	0	0
s__Pseudomonas_E paracarnis	37.259587036666666	98.6766	72.94039000666666	0.579293	201.218	354.897	29.40800536333333	3.2841389650000004	9694.963213216668	134.92012567166665	34.62029989166667	19.994376146666667	890.230018974028	1184.3224910279632	7.952602812222222	-7.21842	Sewage	Opportunistic or Risk-associated	Unclassified	d__Bacteria	p__Pseudomonadota	c__Gammaproteobacteria	o__Pseudomonadales	f__Pseudomonadaceae	g__Pseudomonas_E	0	0	7.58453	0	0	0	0	0	0	0	0	0	0	0	0	0	0	0	0	0
s__Pseudomonas_E parakoreensis	7.875751166666667	39.973453991666666	29.494796831666665	0.656987	41.83212350666667	599.1360062166666	135.28778268333335	1.3671612666666668	9163.4	293.6358267178333	55.877559006666665	30.6373	866.5978225256528	1151.8347103651297	10.887159007222223	-6.72516	Sewage	Opportunistic or Risk-associated	Unclassified	d__Bacteria	p__Pseudomonadota	c__Gammaproteobacteria	o__Pseudomonadales	f__Pseudomonadaceae	g__Pseudomonas_E	0	185.634	0	0	0	13.1351	0	0	0	0	0	0	0	0	0	0	0	0	22.2843	0
s__Acinetobacter wuhouensis	1228.3920960358334	521.09	523.801	4.12833	1365.72	499.66670662666667	990.314	10.715421806666669	2135.4850250866666	905.454	757.4345001733333	200.44212358999997	761.8869843190973	991.9286591636112	71.76195978555555	-3.78895	NS	Opportunistic or Risk-associated	Human_related	d__Bacteria	p__Pseudomonadota	c__Gammaproteobacteria	o__Pseudomonadales	f__Moraxellaceae	g__Acinetobacter	21.7038	0	0	5.4501	0	1.69567	10.383	0	0	0	0	0	0	0	0	22.1613	0	0	0	11.4869
s__Macromonas bipunctata	188.504	2739.1645347399995	1197.7475923933332	9.850246341666669	34.05883962666667	46.14850147166667	90.8157	10.3988	11.0605	55.895819464999995	2708.3606082283336	2850.4786478916667	828.5402967806945	785.7506518294445	956.9092316344444	0.2843105194160737	BTB	Unclassified	Unclassified	d__Bacteria	p__Pseudomonadota	c__Gammaproteobacteria	o__Burkholderiales	f__Burkholderiaceae_B	g__Macromonas	3698.89	22.9695	0	0	0	0	9.85324	0	15.7902	0	0	0	7.7341	0	0	0	0	0	0	0
s__Pseudomonas_E bubulae	196.275	1227.13	2410.32	0.726642	7.95226	1849.5178809433337	194.83202448833333	1.1370441383333334	2291.52	1237.4704481766669	310.30511965500006	30.303584121666663	813.1242411936113	1080.5915137848149	10.722423419999998	-6.65505	Sewage	Opportunistic or Risk-associated	Unclassified	d__Bacteria	p__Pseudomonadota	c__Gammaproteobacteria	o__Pseudomonadales	f__Pseudomonadaceae	g__Pseudomonas_E	0	159.223	0	0	0	0	0	0	0	9.29235	0	0	0	0	0	0	0	0	0	0
s__Escherichia coli	394.7154818391666	379.62678086666665	267.90960106333335	0	1879.6729833483332	1012.64	54.7869	0	3706.5100161766663	1767.8187432116667	31.765959743333337	3.633607768333333	791.590246795875	1055.0499281980185	1.2112025894444445	-9.76666	Sewage	Opportunistic or Risk-associated	Human_related	d__Bacteria	p__Pseudomonadota	c__Gammaproteobacteria	o__Enterobacterales	f__Enterobacteriaceae	g__Escherichia	0	48.6619	0	0	0	0	46.5956	106.411	4.39622	0	0	0	0	0	0	0	0	0	0	0
s__Tolumonas auensis	152.22063291166666	1462.8169665449998	4942.937148011667	0.5003738916666667	325.6481998383333	1527.6880248116668	294.39169068166666	0.4331528083333333	31.265770828333338	320.2182753416667	608.7770537066667	3.648450171666666	805.8788116290276	1073.9959736307408	1.5273256238888886	-9.45777	Sewage	Unclassified	Unclassified	d__Bacteria	p__Pseudomonadota	c__Gammaproteobacteria	o__Enterobacterales_A	f__Aeromonadaceae	g__Tolumonas	0	158.04	130.575	29.2775	39.9014	105.72	0	0	29.2775	0	0	0	0	0	0	0	0	0	0	0
s__Shewanella oncorhynchi	14.128151545833331	4604.9682593766665	3625.223693016667	0	19.668023456666667	51.00033807166667	7.224738390833333	0	4.717846736666666	880.869	462.62158250833335	134.992	817.1178029871943	1074.4913089084812	44.997285223333336	-4.57767	NS	Unclassified	Unclassified	d__Bacteria	p__Pseudomonadota	c__Gammaproteobacteria	o__Enterobacterales_A	f__Shewanellaceae	g__Shewanella	0	0	0	0	0	0	0	0	0	0	0	0	0	0	0	0	0	0	0	0
s__Aliarcobacter faecis	1138.13	1803.0987433981663	2064.05	1.41633	444.56315083333334	1177.3	519.145	0.5061226016666667	14.329625143333333	976.686	492.225	5.59273	719.7533061405417	958.8360546372036	2.505060650555556	-8.58029	Sewage	Opportunistic or Risk-associated	Human_related	d__Bacteria	p__Campylobacterota	c__Campylobacteria	o__Campylobacterales	f__Arcobacteraceae	g__Aliarcobacter	103.933	299.262	0	977.556	1600.75	447.876	0	0	116.866	83.0146	21.9003	0	0	0	0	32.6705	0	0	0	0
s__Malikia granosa	42.395090009166665	46.8697	105.23282247333331	10.290533566666667	51.5161	61.89731309166667	92.90519642833334	23.5498	28.0905	78.04652035833332	4267.7	4865.31	806.150071871875	530.516738813426	1633.0500710472222	1.6220988493892083	BTB	Unclassified	Unclassified	d__Bacteria	p__Pseudomonadota	c__Gammaproteobacteria	o__Burkholderiales	f__Burkholderiaceae_B	g__Malikia	572.548	0	0	640.824	0	0	0	0	78.8745	0	0	0	0	0	0	0	0	125.825	0	0
s__Gemmiger qucibialis	1301.0298629033334	1087.5085698328332	215.763	1.08451	979.711	1149.6181286033334	202.75491136166667	2.1198695383333335	748.7940910983333	2364.4827601849997	146.37989963333334	1.8801750833333333	683.4271912687085	910.6713049942038	1.6948500922222225	-9.06963	Sewage	SCFA-producing fermenters	Human_related	d__Bacteria	p__Bacillota_A	c__Clostridia	o__Oscillospirales	f__Ruminococcaceae	g__Gemmiger	0	36.191	91.6724	0	0	0	151.698	0	0	0	0	0	0	0	0	0	0	0	0	0
s__Bacteroides cellulosilyticus	1602.1060862991665	741.474	332.5965538666667	0.187114	1084.67	823.4346725400001	117.702	0.3338658383333333	2407.7019751216667	722.597	51.824822600000005	7.386347151666667	657.6681864982501	876.0123234193334	2.63578	-8.37658	Sewage	SCFA-producing fermenters	Human_related	d__Bacteria	p__Bacteroidota	c__Bacteroidia	o__Bacteroidales	f__Bacteroidaceae	g__Bacteroides	1.71542	32.2867	0	0	30.6755	0	0	0	0	0	12.3598	0	0	0	0	0	37.1656	0	0	0
s__Pseudomonas_E fluorescens_BV	22.365814238333332	57.911182447166674	43.272751236666664	0	176.40138540166666	291.09389988833334	22.415838316666665	0	8624.943156619998	98.976	15.672131063333332	2.8209634566666666	779.656092533236	1039.2280163269072	0.9403211522222222	-10.1101	Sewage	Opportunistic or Risk-associated	Unclassified	d__Bacteria	p__Pseudomonadota	c__Gammaproteobacteria	o__Pseudomonadales	f__Pseudomonadaceae	g__Pseudomonas_E	0	0	0	0	0	0	0	0	41.8581	0	0	0	0	0	0	0	0	0	0	0
s__Bacteroides xylanisolvens	1258.574396579167	925.1350700981666	492.4059643816667	0	940.1524006263334	1025.623406768333	142.02984967666666	0.0409436	1830.7990228933336	1127.3592795076668	215.66867608166663	0.8645540349999999	663.22113035025	884.1942296236667	0.301833	-11.5164	Sewage	SCFA-producing fermenters	Human_related	d__Bacteria	p__Bacteroidota	c__Bacteroidia	o__Bacteroidales	f__Bacteroidaceae	g__Bacteroides	7.8409	79.6994	0	40.7952	0	0	0	0	21.2955	0	0	0	30.6346	0	0	10.956	103.804	0	0	0
s__Bacteroides stercoris	919.849	512.8370966366666	274.4803290283333	0	1739.71	1517.114339298333	442.58446387333333	0	1874.8358378416667	649.6190518583334	219.6710650916667	4.8616	679.6299122277777	905.6330389025926	1.6205322033333334	-9.12632	Sewage	SCFA-producing fermenters	Human_related	d__Bacteria	p__Bacteroidota	c__Bacteroidia	o__Bacteroidales	f__Bacteroidaceae	g__Bacteroides	242.345	27.4456	18.1137	0	13.7433	17.6264	0	0	0	0	0	0	165.759	0	24.9707	0	73.7132	0	0	28.5854
s__Acinetobacter towneri	1708.3384263583332	478.203	441.36630880666667	0.4200765883333333	888.2130982949999	923.577	1161.6094520516667	2.1123054016666667	793.8444536400001	546.9244401233333	346.22054886999996	30.536819318333333	610.1138706643611	809.810805184889	11.023067102777778	-6.19899	Sewage	Opportunistic or Risk-associated	Human_related	d__Bacteria	p__Pseudomonadota	c__Gammaproteobacteria	o__Pseudomonadales	f__Moraxellaceae	g__Acinetobacter	193.704	201.405	0	202.886	0	19.331	0	42.0521	0	0	0	0	0	0	0	0	0	0	0	0
s__Faecalibacterium prausnitzii_A	784.152	716.03	327.2305783816667	0.0646947366666666	1291.9822127066666	1698.6730852816663	404.41833951833337	0.4396025149999999	758.717	1891.4926153616668	343.416	6.290275005000001	685.2421550863888	912.901254308889	2.264857418888889	-8.65489	Sewage	SCFA-producing fermenters	Human_related	d__Bacteria	p__Bacillota_A	c__Clostridia	o__Oscillospirales	f__Ruminococcaceae	g__Faecalibacterium	184.302	254.485	0	8.06807	0	91.9245	106.389	0	30.3194	0	0	0	0	0	0	82.0469	0	76.407	0	0
s__Flavobacterium bernardetii	11.786358504166666	893.0488585466668	1269.0458282533334	0	8.498636306666667	5.5893	2674.76	8.368578966666666	5.92525	175.225	1972.45	1925.2818320533331	745.8321609434029	779.5928355889815	644.5501370066667	-0.274428	BTB	Unclassified	Unclassified	d__Bacteria	p__Bacteroidota	c__Bacteroidia	o__Flavobacteriales	f__Flavobacteriaceae	g__Flavobacterium	0	26.1425	0	7.7852	12.4461	0	0	0	0	7.7852	0	0	95.1326	0	0	0	0	0	0	0
s__Acinetobacter gerneri	493.2255320658333	590.2237195166666	504.186	2.8471552599999996	1385.0160197733333	546.4392346966666	1037.7202235483337	7.079470801666666	1790.769848443333	1121.87	834.1987716066666	81.80924858499999	699.615795786875	922.628186088426	30.57862488222222	-4.91515	Sewage	Opportunistic or Risk-associated	Human_related	d__Bacteria	p__Pseudomonadota	c__Gammaproteobacteria	o__Pseudomonadales	f__Moraxellaceae	g__Acinetobacter	93.7117	0	0	7.97139	0	0	0	0	0	0	61.3471	0	0	5.7705	0	0	0	0	0	0
s__Streptococcus suis_AA	2998.880207433333	1238.2618522933333	752.8795272733333	0.419286	48.92947903666666	433.869	293.20447376166663	0	16.253146474999998	24.747332286666666	16.291422400000002	0.8941952799999999	485.3858443091665	647.0351833883332	0.4378270716666666	-10.5293	Sewage	Opportunistic or Risk-associated	Human_related	d__Bacteria	p__Bacillota	c__Bacilli	o__Lactobacillales	f__Streptococcaceae	g__Streptococcus	204.717	0	0	469.989	0	0	130.891	0	0	131.406	170.014	0	0	0	0	0	0	0	0	0
s__Flavobacterium sasangense	663.5525909133333	930.482	606.7746482183333	0	778.3688636716666	229.58489199666667	1830.74	6.737686364999999	157.602	485.833	1333.1111223433334	1102.7264837516666	677.1259523829166	779.5608064975927	369.82139003888886	-1.07583	BTB	Unclassified	Unclassified	d__Bacteria	p__Bacteroidota	c__Bacteroidia	o__Flavobacteriales	f__Flavobacteriaceae	g__Flavobacterium	107.395	33.6014	0	7.86073	0	0	0	0	13.4687	13.9532	0	0	0	0	8.39823	0	0	0	0	0
s__Faecalibacterium prausnitzii_I	908.731	624.2758543766666	233.047	1.7364964616666667	1576.4	2030.5375533583335	329.104	1.7876306599999998	804.9470726399999	1131.3509653583333	170.074	11.0354	651.9186863879168	867.607194427037	4.853162270555555	-7.48197	Sewage	SCFA-producing fermenters	Human_related	d__Bacteria	p__Bacillota_A	c__Clostridia	o__Oscillospirales	f__Ruminococcaceae	g__Faecalibacterium	4.44663	135.232	29.8496	0	0	0	108.702	0	0	139.405	0	0	0	0	0	0	0	0	0	0
s__Agathobacter faecis	556.4026126441667	946.1328133133334	155.02554721833334	0	1492.9018309366666	1324.73	1076.1201840383333	0.0804926583333333	1272.468357706667	1179.5359630726666	88.1662	0.42295	674.3324524207083	899.0539984472406	0.1678143411111111	-12.3873	Sewage	SCFA-producing fermenters	Human_related	d__Bacteria	p__Bacillota_A	c__Clostridia	o__Lachnospirales	f__Lachnospiraceae	g__Agathobacter	18.8223	55.2716	0	0	128.067	19.1041	0	0	19.894	188.472	0	0	0	0	0	35.0362	0	0	0	0
s__Aliarcobacter butzleri	1359.8498703358334	1066.8997093883331	1506.91	0.15318	1067.1781236933334	1205.8653482383334	595.7750714483333	10.687521983333331	64.4942	248.53768905083336	126.57692463166666	1.2554724733333331	604.5150757527778	804.6760815701851	4.032058300555555	-7.64075	Sewage	Opportunistic or Risk-associated	Human_related	d__Bacteria	p__Campylobacterota	c__Campylobacteria	o__Campylobacterales	f__Arcobacteraceae	g__Aliarcobacter	37.4162	354.235	0	0	0	0	0	20.5069	50.1184	0	0	0	0	0	6.07039	0	24.9979	0	0	0
s__Sphaerotilus montanus	33.060206175833336	33.42687237333333	55.75646594666666	80.4602	5.79765	5.183495181666667	1615.938182053333	67.17230333333333	14.340911666666663	14.564722111666669	975.1684794683332	5678.457036246667	714.9438807668749	305.91522050305554	1942.029861558333	2.6663615908463436	BTB	WWTP Core Functional	Non_Human_related	d__Bacteria	p__Pseudomonadota	c__Gammaproteobacteria	o__Burkholderiales	f__Burkholderiaceae_B	g__Sphaerotilus	37.2273	40.5585	55.5194	4.057	11.184	23.9921	10.8262	0	0	0	21.4251	0	9.34959	0	0	17.876	0	0	0	0
s__Pseudomonas_E extremaustralis	206.015	283.56173234166664	462.253	3.5304118599999996	495.39787866366663	2498.4466584916668	487.61318743116664	1.48385	2658.4216516883334	950.0902125883334	320.57406160333335	13.482260886666667	698.4058138320694	929.1525831370186	6.165505917222222	-7.23555	Sewage	Opportunistic or Risk-associated	Unclassified	d__Bacteria	p__Pseudomonadota	c__Gammaproteobacteria	o__Pseudomonadales	f__Pseudomonadaceae	g__Pseudomonas_E	0	27.236	11.261	0	0	0	0	0	0	0	0	0	0	0	0	0	0	0	0	2.46192
s__Pseudomonas_E fragi	157.40483381666664	1143.6253998366667	2215.4737604233333	1.15283	7.582860928333333	2040.58	195.5993631816667	1.69357	784.2976400266666	1436.098082728333	327.2311419216667	4.124900438333333	692.9056143205554	923.0995634642592	2.3237668894444448	-8.63388	Sewage	Opportunistic or Risk-associated	Unclassified	d__Bacteria	p__Pseudomonadota	c__Gammaproteobacteria	o__Pseudomonadales	f__Pseudomonadaceae	g__Pseudomonas_E	0	28.8706	0	0	0	0	0	0	0	0	0	0	0	0	0	0	0	0	0	0
s__Faecalibacterium hattorii	639.3874562108334	520.6580407366666	213.376	1.0820653483333331	1371.7954581583333	2029.0709875966663	443.6553337933333	1.25307	599.7339952383334	1819.9298668466663	144.97377480333333	4.574823931666667	649.1242787020138	864.7312650132407	2.3033197683333335	-8.55239	Sewage	SCFA-producing fermenters	Human_related	d__Bacteria	p__Bacillota_A	c__Clostridia	o__Oscillospirales	f__Ruminococcaceae	g__Faecalibacterium	22.7413	257.938	16.1996	0	16.3686	0	0	0	0	0	0	0	0	0	0	0	0	36.9989	0	0
s__Aeromonas bivalvium	213.87379534749996	604.1362173483334	844.1658959183334	1.7976551383333332	2945.065961853333	1530.1071062216668	224.528	7.757496586666666	382.3822032616667	810.7847236983333	556.4472289383333	61.782498610000005	681.9023672210417	901.2767507019444	23.779216778333335	-5.2442	Sewage	Opportunistic or Risk-associated	Human_related	d__Bacteria	p__Pseudomonadota	c__Gammaproteobacteria	o__Enterobacterales_A	f__Aeromonadaceae	g__Aeromonas	0	123.943	0	307.087	0	239.703	0	0	19.4651	0	7.66228	0	0	0	0	0	0	3.86391	0	0
s__Pseudomonas_E rustica	9.161932368333334	110.88329151666666	86.46490987166668	0.17449	14.7722	55.87036764500001	41.17181560833333	0.0423203	7190.743911250001	364.649	246.72619664833337	254.04	697.8916789911112	902.271458419815	84.7523	-3.41224	NS	Opportunistic or Risk-associated	Unclassified	d__Bacteria	p__Pseudomonadota	c__Gammaproteobacteria	o__Pseudomonadales	f__Pseudomonadaceae	g__Pseudomonas_E	26.0269	26.6202	58.481	0	0	0	214.357	20.4271	4.27593	15.6254	0	4.27593	0	0	48.5829	0	0	0	0	0
s__Aliarcobacter cloacae	509.5654771683333	2229.399653926667	3141.6632850583333	0	108.33905937000002	491.102	488.734	0	3.3202673583333335	388.816	499.083	9.360300981666668	655.7819427590279	873.3358902362963	3.120100327222223	-8.1288	Sewage	Opportunistic or Risk-associated	Human_related	d__Bacteria	p__Campylobacterota	c__Campylobacteria	o__Campylobacterales	f__Arcobacteraceae	g__Aliarcobacter	763.717	614.892	0	312.227	264.288	268.088	22.2322	0	73.0037	6.15478	0	4.06888	67.9746	0	0	13.8578	0	392.233	0	0
s__Aliarcobacter ellisii	536.8075574508333	2189.5663299933335	2877.91	0.9781736516666668	174.61596859166664	653.2891542183334	613.8925732833334	0.225638	7.669097566666667	323.64427194833337	450.1977949666666	12.340225398333333	653.4277449511806	869.7321002543517	4.514679041666667	-7.5898	Sewage	Opportunistic or Risk-associated	Human_related	d__Bacteria	p__Campylobacterota	c__Campylobacteria	o__Campylobacterales	f__Arcobacteraceae	g__Aliarcobacter	82.4279	126.508	54.5031	118.987	42.4061	29.0841	0	0	47.4292	0	32.4985	0	0	0	56.8694	34.6804	0	58.934	15.1831	0
s__Prevotella rara	262.53571879916666	86.08155852666665	57.3021	0	2978.575821766666	3388.865712623334	991.777	1.4689508466666668	185.623	51.289035211999995	25.00106101833333	2.5295335683333335	669.2541765538472	891.8946260256852	1.3328281383333334	-9.38624	Sewage	Opportunistic or Risk-associated	Human_related	d__Bacteria	p__Bacteroidota	c__Bacteroidia	o__Bacteroidales	f__Bacteroidaceae	g__Prevotella	0	31.9445	34.5023	5.05245	37.873	0	0	0	0	32.6878	0	0	0	0	0	0	0	0	0	0
s__Fusicatenibacter saccharivorans	860.1428856608333	2032.2320649838332	230.98106294333337	0	796.8319070849999	1034.4316508266668	105.88663635483331	0	699.1617316400001	1509.75	64.67044901333334	2.269353208333333	611.3630275795139	814.8985530828703	0.7564510694444443	-10.0732	Sewage	SCFA-producing fermenters	Human_related	d__Bacteria	p__Bacillota_A	c__Clostridia	o__Lachnospirales	f__Lachnospiraceae	g__Fusicatenibacter	0	0	48.0486	0	19.7074	0	0	0	0	0	0	0	0	0	0	0	0	0	0	0
s__Pseudoxanthomonas_A mexicana	2463.128589084167	747.3470828549999	583.2408007816666	15.085	167.93605479166666	304.63711248333334	304.23302527333334	2.8081461433333335	574.5393761433334	231.554	50.55116593333333	283.0341296266667	477.34120190048617	603.0185712250927	100.30909392666668	-2.58775	BTB	WWTP Core Functional	Non_Human_related	d__Bacteria	p__Pseudomonadota	c__Gammaproteobacteria	o__Xanthomonadales	f__Xanthomonadaceae	g__Pseudoxanthomonas_A	0	0	26.8735	0	0	0	0	0	0	0	0	0	0	0	0	0	0	0	0	0
s__Cloacibacterium normanense	1385.5080563675	696.0943512983334	573.5149786983334	0	588.975	812.565	2217.804782836833	0.8291262466666667	71.02175107166666	296.121	135.61945625666667	5.05916	565.2594666138333	753.0250348060371	1.962762037222222	-8.58367	Sewage	WWTP Core Functional	Non_Human_related	d__Bacteria	p__Bacteroidota	c__Bacteroidia	o__Flavobacteriales	f__Weeksellaceae	g__Cloacibacterium	93.5325	69.8552	0	0	0	233.744	0	0	0	79.9673	0	0	44.9457	0	13.5271	0	0	0	0	0
s__Aeromonas veronii	94.70243365666668	775.7988682916666	766.9267287900001	0.0911024383333333	3328.7938601366664	2097.8769099783335	199.41379555333333	0.1572698133333333	129.72881035166668	299.6035705566667	221.066	12.7857	660.5787775018056	879.3234779955555	4.344676020555555	-7.661	Sewage	Opportunistic or Risk-associated	Human_related	d__Bacteria	p__Pseudomonadota	c__Gammaproteobacteria	o__Enterobacterales_A	f__Aeromonadaceae	g__Aeromonas	0	0	0	38.4952	0	38.4952	0	0	0	0	0	0	33.4106	0	13.0503	0	0	0	0	0
s__Klebsiella ornithinolytica	49.18254447249999	528.8509043116667	391.9983358066667	0.285715	1275.1044204399998	608.0698215533333	201.64860466166667	1.0813482266666667	4437.140193553333	366.08	100.593	7.363159884999999	663.9498201313194	884.2964021004631	2.910074223888889	-8.24733	Sewage	Opportunistic or Risk-associated	Human_related	d__Bacteria	p__Pseudomonadota	c__Gammaproteobacteria	o__Enterobacterales	f__Enterobacteriaceae	g__Klebsiella	0	1.27226	0	0	0	0	0	0	0	0	0	0	0	0	0	0	0	0	0	0
s__Prevotella copri_A	811.8879611216666	827.0390628166666	498.496	0.0362345216666666	1098.3356077683331	1806.5382190416667	378.503	0.2418598883333333	871.6173211933333	617.8554742966667	140.35693938666668	1.9574378466666669	587.7387326055555	783.403251001111	0.7451774188888889	-10.038	Sewage	Opportunistic or Risk-associated	Human_related	d__Bacteria	p__Bacteroidota	c__Bacteroidia	o__Bacteroidales	f__Bacteroidaceae	g__Prevotella	27.5608	28.9136	0	7.3538	196.138	0	11.484	0	4.30318	71.3327	0	0	0	0	0	0	39.2608	5.93713	0	0
s__Blautia_A wexlerae	568.5493585841667	1746.9841379066668	222.93150314833335	0	1251.4260490733334	1225.532933533333	190.125	1.13385	971.02	997.168	77.43006662166665	8.240374353333333	605.0451263843195	805.6852542326111	3.1247428394444445	-8.01034	Sewage	SCFA-producing fermenters	Human_related	d__Bacteria	p__Bacillota_A	c__Clostridia	o__Lachnospirales	f__Lachnospiraceae	g__Blautia_A	0	14.2684	68.0067	0	0	12.7169	0	0	0	21.905	0	0	0	0	0	18.8519	0	0	0	0
s__Ottowia beijingensis	1773.0016913233333	589.2575775516667	437.3010297183334	87.17416890333334	255.6913600306667	96.82471518833334	147.87252532833335	2226.2237034816667	102.157	151.1735427333333	88.71794292333334	66.90213300166666	501.8581474024167	404.6664181602592	793.4333351288889	0.971375882019948	BTB	WWTP Core Functional	Non_Human_related	d__Bacteria	p__Pseudomonadota	c__Gammaproteobacteria	o__Burkholderiales	f__Burkholderiaceae_B	g__Ottowia	138.794	7.29312	0	19.2185	0	9.88947	0	0	0	0	0	0	0	0	33.7268	0	0	0	28.867	0
s__Klebsiella huaxiensis	47.9749	172.09838958166665	341.5939689883333	0.2160019133333333	2575.792221313334	446.3796488166667	146.522	0.6666287266666667	3126.85	721.5896028598332	146.6631386933333	14.4717	645.0679689342222	858.384584302852	5.118122828333333	-7.38987	Sewage	Opportunistic or Risk-associated	Human_related	d__Bacteria	p__Pseudomonadota	c__Gammaproteobacteria	o__Enterobacterales	f__Enterobacteriaceae	g__Klebsiella	0	0	0	0	0	0	0	0	0	0	0	0	0	0	0	0	0	0	0	0
s__Alistipes putredinis	1065.6866003991663	745.6825922950001	402.204	0.606111	935.0212125183334	1211.4325331533337	397.195	0.4804411516666667	779.6636359816666	811.272	290.7512590633333	4.150425978333334	553.6788422713196	737.6565699239816	1.7456593133333336	-8.72303	Sewage	SCFA-producing fermenters	Human_related	d__Bacteria	p__Bacteroidota	c__Bacteroidia	o__Bacteroidales	f__Rikenellaceae	g__Alistipes	46.2046	124.156	0	0	41.4484	30.4405	0	0	0	0	0	0	0	0	206.747	0	0	0	0	0
s__Alistipes onderdonkii	1250.1172706575	710.0501717073333	279.7756137633333	0.8324168599999999	736.2589734716666	786.9326886933333	196.46736696333335	1.32129	1253.2119097333332	1048.4701779553334	117.41087629833332	3.555619201666667	532.0336982237638	708.7438943603888	1.903109813888889	-8.54076	Sewage	SCFA-producing fermenters	Human_related	d__Bacteria	p__Bacteroidota	c__Bacteroidia	o__Bacteroidales	f__Rikenellaceae	g__Alistipes	65.7313	60.0473	0	25.23	35.6876	0	0	0	0	0	0	0	0	0	0	0	0	0	0	0
s__Polymorphobacter_A arshaanensis	1.5275170166666667	3.67719	2.596550711666666	2.70569	0.5926050566666667	0.6616335616666666	2.142544583333333	14.001700153333331	3.897268263333333	4.765515756666667	613.0910457083334	6970.037162495001	634.9747020372223	70.3279860537037	2328.9148499877783	5.049415178127984	BTB	Unclassified	Unclassified	d__Bacteria	p__Pseudomonadota	c__Alphaproteobacteria	o__Sphingomonadales	f__Sphingomonadaceae	g__Polymorphobacter_A	118.372	0	0	0	0	42.5369	0	0	0	0	0	0	0	0	44.8792	0	0	0	0	0
s__Citrobacter freundii	154.63964163333333	408.4140940666666	474.182	0.209239	3707.53	1276.9218565833332	123.684	0.1308743583333333	780.0114376266666	444.3287607239999	42.262998331666665	10.001402248333331	618.5264766047777	823.5529115456296	3.4471717822222216	-7.9003	Sewage	Opportunistic or Risk-associated	Human_related	d__Bacteria	p__Pseudomonadota	c__Gammaproteobacteria	o__Enterobacterales	f__Enterobacteriaceae	g__Citrobacter	0	0	0	19.8512	0	11.0203	0	11.4633	0	0	0	0	0	0	0	0	0	0	0	0
s__Bacteroides ovatus	1007.0709578325	839.637	396.9473431116666	0	642.3399940933333	947.9518043116668	119.075	0.2474251333333333	1461.1771716083333	886.8594377740001	237.25852730166665	1.83672	545.0335140785834	726.4797803771852	0.6947151827777778	-10.0303	Sewage	SCFA-producing fermenters	Human_related	d__Bacteria	p__Bacteroidota	c__Bacteroidia	o__Bacteroidales	f__Bacteroidaceae	g__Bacteroides	0	0	0	0	20.7964	0	0	0	0	0	0	0	0	0	0	0	0	0	0	0
s__Parabacteroides merdae	738.16	499.54563879666665	190.944	0.1743054166666666	1092.2831159466666	1171.6940656866666	198.38748124433337	0	919.95	1547.11	66.7776	1.3052996433333333	535.5278668739028	713.8727552696481	0.4932016866666666	-10.4993	Sewage	SCFA-producing fermenters	Human_related	d__Bacteria	p__Bacteroidota	c__Bacteroidia	o__Bacteroidales	f__Tannerellaceae	g__Parabacteroides	0	0	36.1257	6.60218	26.6049	0	13.562	0	0	0	0	0	0	0	0	56.1635	44.1433	0	0	0
s__Faecalibacterium prausnitzii_E	1245.55	1054.9398051583332	454.929	0	559.7635204616666	974.8687146533332	191.201	0	214.28129910166663	1024.553094030167	122.078	8.281835458333333	487.5374352637499	649.1297097451851	2.760611819444444	-7.87737	Sewage	SCFA-producing fermenters	Human_related	d__Bacteria	p__Bacillota_A	c__Clostridia	o__Oscillospirales	f__Ruminococcaceae	g__Faecalibacterium	0	81.379	0	0	0	0	0	0	0	0	0	0	0	0	0	15.1016	0	0	0	0
s__Faecalibacterium prausnitzii_F	667.94420770875	502.02313520333337	246.61831162166663	0.6811552733333334	1389.1417939583334	1516.73	357.497	0.3524281683333334	267.225	1278.54	133.513	3.91291	530.3486385758958	706.5819078721204	1.6488306872222225	-8.74327	Sewage	SCFA-producing fermenters	Human_related	d__Bacteria	p__Bacillota_A	c__Clostridia	o__Oscillospirales	f__Ruminococcaceae	g__Faecalibacterium	150.4	101.844	42.9543	0	0	25.0226	19.2418	0	0	22.7373	0	17.0716	0	0	0	4.13054	0	0	0	0
s__Aliarcobacter defluvii	518.6341871008334	1611.8922414383333	2400.755171111666	0.0567417183333333	146.60563900166667	477.9263883533333	422.93435746666665	0	4.57403	444.2023477116666	424.96724745166665	15.615807573333331	539.0136798735415	716.9435121323146	5.224183097222221	-7.10051	Sewage	Opportunistic or Risk-associated	Human_related	d__Bacteria	p__Campylobacterota	c__Campylobacteria	o__Campylobacterales	f__Arcobacteraceae	g__Aliarcobacter	63.9372	113.186	0	0	1182.54	387.061	0	0	209.658	0	0	7.12796	20.8782	0	0	0	0	0	0	0
s__Ruminococcus_E bromii_B	845.535	2002.95	317.22379437833337	0.0357578	784.073	678.21	230.82393984166663	0.4044135749999999	602.7053752633334	488.69328737166666	107.623	2.031727661666667	505.0261398270141	673.0935309913889	0.823966333888889	-9.67401	Sewage	SCFA-producing fermenters	Human_related	d__Bacteria	p__Bacillota_A	c__Clostridia	o__Oscillospirales	f__Acutalibacteraceae	g__Ruminococcus_E	12.5575	44.599	67.4325	48.4329	0	0	0	0	0	0	0	0	0	0	0	12.8824	0	0	0	0
s__Acinetobacter tianfuensis	327.6105339883333	419.25612097333334	310.553	1.8612	980.0501049766668	438.859	864.1021432466667	6.99933	1626.9332729983337	890.99	595.9442911833333	85.67698397833334	545.7362737370835	717.1441965507407	31.51250529611111	-4.50827	NS	Opportunistic or Risk-associated	Human_related	d__Bacteria	p__Pseudomonadota	c__Gammaproteobacteria	o__Pseudomonadales	f__Moraxellaceae	g__Acinetobacter	387.648	4.12114	0	64.8592	0	11.3469	0	0	0	0	0	0	0	95.3221	0	0	0	0	0	0
s__Aliarcobacter porcinus	896.934	1201.7540697733334	1290.5334822983334	0.434722	345.09031064500005	855.621	364.7363409883333	0.4437876383333334	5.80406	695.2682145483333	278.2282570516667	0.7262345483333333	494.6311581347222	659.3299058972223	0.5349148472222223	-10.2675	Sewage	Opportunistic or Risk-associated	Human_related	d__Bacteria	p__Campylobacterota	c__Campylobacteria	o__Campylobacterales	f__Arcobacteraceae	g__Aliarcobacter	1354.69	495.818	0	190.096	0	306.258	0	0	65.2112	0	0	0	479.087	42.4478	125.748	0	44.1317	0	0	0
s__Aeromonas fluvialis	172.81778879916666	600.8365402983333	926.565	0.721043	1624.0905113600002	1323.2154893116667	213.6070303616667	5.207721153333334	286.36	711.9198040133333	577.516	78.85613365833333	543.4760935329862	715.2142471704631	28.261632620555556	-4.66146	Sewage	Opportunistic or Risk-associated	Human_related	d__Bacteria	p__Pseudomonadota	c__Gammaproteobacteria	o__Enterobacterales_A	f__Aeromonadaceae	g__Aeromonas	0	105.897	0	98.894	0	0	5.02684	0	0	8.99324	84.7355	0	0	0	20.2594	0	114.387	0	0	0
s__Dysosmobacter welbionis	717.1408489216666	274.009	103.08934607166668	0.134393	1310.3291047345	1045.53	297.298	1.7530933933333337	827.5788391583334	1322.9808513116666	54.419861981666664	5.505385351666667	496.64776071370846	661.3755841227223	2.4642904866666666	-8.06815	Sewage	Unclassified	Unclassified	d__Bacteria	p__Bacillota_A	c__Clostridia	o__Oscillospirales	f__Oscillospiraceae	g__Dysosmobacter	18.5459	0	23.0944	0	0	0	9.0303	0	0	0	0	0	0	0	0	0	0	0	0	0
s__Roseburia inulinivorans	528.2779854016667	559.2372438616667	96.85312086833332	0	1345.7213484466668	1415.4801656766667	403.124	0.0948570116666666	770.179	967.57	54.52743894333333	1.4660348016666669	511.87756039722234	682.3299814392593	0.5202972711111111	-10.3569	Sewage	SCFA-producing fermenters	Human_related	d__Bacteria	p__Bacillota_A	c__Clostridia	o__Lachnospirales	f__Lachnospiraceae	g__Roseburia	0	8.43803	13.6812	0	88.3718	0	0	0	0	0	0	0	0	0	0	0	0	0	0	0
s__Acinetobacter brisouii_A	272.963	367.7361737216667	513.206	0.3852874316666666	838.7493456133334	395.5985618783334	691.6987001886667	3.920271654999999	2052.5235694266667	662.0760783266667	466.8358272800001	72.62602614666666	528.1931750303056	695.7096127922593	25.64386174444444	-4.7618	Sewage	Opportunistic or Risk-associated	Human_related	d__Bacteria	p__Pseudomonadota	c__Gammaproteobacteria	o__Pseudomonadales	f__Moraxellaceae	g__Acinetobacter	39.0661	0	4.83576	0	0	8.86006	6.07762	93.1136	0	2.0908	54.9848	0	0	0	0	0	0	0	0	0
s__Bacteroides caccae	672.3752742591666	480.5645540323333	231.89939382166665	0	749.1386757366666	933.3514135233332	146.41626072683331	0	1660.511618558333	689.6178061566667	95.90163569666667	1.04882	471.73545432847214	628.864070279074	0.3496064766666666	-10.8128	Sewage	SCFA-producing fermenters	Human_related	d__Bacteria	p__Bacteroidota	c__Bacteroidia	o__Bacteroidales	f__Bacteroidaceae	g__Bacteroides	76.0088	0	0	0	0	28.0561	0	0	0	0	0	0	0	0	0	0	10.1226	0	0	0
s__Citrobacter braakii	95.94167958333333	127.299	207.98477582833337	0	3269.2528856149997	539.4370481383334	48.554730262166665	0.2485673416666667	1334	558.32	38.57	2.493217366666667	518.5087331300416	691.0403347613518	0.9139282361111112	-9.56247	Sewage	Opportunistic or Risk-associated	Human_related	d__Bacteria	p__Pseudomonadota	c__Gammaproteobacteria	o__Enterobacterales	f__Enterobacteriaceae	g__Citrobacter	5.72056	20.4295	0	0	0	0	14.5772	0	0	0	0	0	0	0	0	0	0	0	0	0
s__Pseudomonas_E fluvialis	589.826	775.4761279866667	868.838	3.2507960566666667	1890.4257413766663	621.446	369.7532764616667	13.969243366666666	74.16325941666666	125.77052723666668	210.817	140.73389018833333	473.7058138608333	614.0573151909258	52.65130987055556	-3.54383	NS	Opportunistic or Risk-associated	Unclassified	d__Bacteria	p__Pseudomonadota	c__Gammaproteobacteria	o__Pseudomonadales	f__Pseudomonadaceae	g__Pseudomonas_E	0	42.4791	89.7172	38.8865	0	0	1.16807	0	0	0	0	0	9.91993	0	0	0	0	0	0	0
s__Acinetobacter pullicarnis	225.3387749166667	491.664	475.809	0	805.0750644366667	531.6804469366667	646.7068978416667	5.4397292466666665	1040.920815961667	961.395	687.0271891866665	55.5393	493.88303003013897	651.735	20.326357460555556	-5.00286	Sewage	Opportunistic or Risk-associated	Human_related	d__Bacteria	p__Pseudomonadota	c__Gammaproteobacteria	o__Pseudomonadales	f__Moraxellaceae	g__Acinetobacter	181.593	0	0	0	0	0	0	0	0	0	69.3565	0	0	0	0	0	6.62061	0	0	0
s__Paracoccus lutimaris	201.0001985383333	415.587	74.55038523833333	10.972234121666666	273.54712630166665	164.706	120.44140786833331	88.50883002500001	3277.812550498333	1116.316526372833	36.470244396666665	17.228642886666666	483.09510774648606	631.1590651027223	38.90323567777778	-4.02004	NS	Unclassified	Unclassified	d__Bacteria	p__Pseudomonadota	c__Alphaproteobacteria	o__Rhodobacterales	f__Rhodobacteraceae	g__Paracoccus	0	0	0	0	0	0	34.062	0	0	0	0	0	0	0	0	0	0	0	0	0
s__Acinetobacter bouvetii	106.4	333.54198900166665	274.78	0.1623681016666666	2860.5967718966663	364.70457963000007	446.4372319733333	5.906050381666667	1054.3588483116666	214.78394816266663	152.86653132833334	24.910959246666668	486.6208462636944	645.3856419371482	10.326459243333334	-5.96574	Sewage	Opportunistic or Risk-associated	Human_related	d__Bacteria	p__Pseudomonadota	c__Gammaproteobacteria	o__Pseudomonadales	f__Moraxellaceae	g__Acinetobacter	0	0	0	0	0	8.51355	0	0	18.8712	0	0	0	0	0	0	0	31.4913	0	0	0
s__Aeromonas cavernicola	193.62741720583332	474.4418677416667	633.1273730083334	0.2227456416666666	1779.181945541667	1004.0224046966664	179.11247228333335	2.8879802800000003	213.28548321166667	659.4345708083333	544.4981085183334	59.68583434833334	478.62735027381945	631.192404779537	20.932186756666667	-4.91428	Sewage	Opportunistic or Risk-associated	Human_related	d__Bacteria	p__Pseudomonadota	c__Gammaproteobacteria	o__Enterobacterales_A	f__Aeromonadaceae	g__Aeromonas	381.454	76.1632	0	590.105	54.7515	768.413	0	180.698	0	27.1699	0	0	0	0	0	0	0	0	991.025	0
s__Pseudomonas_E proteolytica	935.3577654491668	370.776	277.6327522633333	1.0342177616666666	17.384741305000002	458.0432116333333	17.551248813333334	2.07065	2437.6787512733335	302.704	95.27624951833332	34.93956451333333	412.53749998798617	545.8228406367593	12.681478041666663	-5.42764	Sewage	Opportunistic or Risk-associated	Unclassified	d__Bacteria	p__Pseudomonadota	c__Gammaproteobacteria	o__Pseudomonadales	f__Pseudomonadaceae	g__Pseudomonas_E	0	0	0	1.95732	0	0	0	0	2.43137	0	0	0	0	0	0	0	0	0	0	0
s__Aeromonas sobria	102.09123513083334	513.4940511916667	603.0795477400001	0.1394606116666666	1742.26	1417.12	169.42866395666667	2.0526758083333334	175.934	572.1042818866666	425.8665639783333	42.46273583333333	480.5025047252083	635.7083538276851	14.884957417777777	-5.41644	Sewage	Opportunistic or Risk-associated	Human_related	d__Bacteria	p__Pseudomonadota	c__Gammaproteobacteria	o__Enterobacterales_A	f__Aeromonadaceae	g__Aeromonas	0	287.373	0	253.177	0	34.6043	0	0	5.14482	0	45.3145	0	0	18.6739	0	0	0	0	0	0
s__Pseudomonas_E mohnii	15.7255	86.51737667666667	219.625	2.04097	30.3388	1128.5580371833332	537.4394550983333	5.27675	2619.9152632383334	747.4595983039999	403.44379318666665	52.89381612166667	487.436224713875	643.2247963238704	20.07050988388889	-5.00217	Sewage	Opportunistic or Risk-associated	Unclassified	d__Bacteria	p__Pseudomonadota	c__Gammaproteobacteria	o__Pseudomonadales	f__Pseudomonadaceae	g__Pseudomonas_E	0	18.4657	23.8548	0	0	0	0	0	0	11.4307	0	0	0	0	0	0	0	0	0	0
s__Paraprevotella clara	710.7390385166667	399.852	151.8224510483333	0.6469780483333333	1277.2822480883333	1409.94	402.4372541083333	0.3658736333333333	603.818	107.416	49.18395453833333	7.77913	426.7736344143055	568.0546253283333	2.930661672222222	-7.59866	Sewage	Opportunistic or Risk-associated	Human_related	d__Bacteria	p__Bacteroidota	c__Bacteroidia	o__Bacteroidales	f__Bacteroidaceae	g__Paraprevotella	0	6.592	0	0	0	6.38954	0	0	0	0	0	0	1.7429	0	0	0	0	0	0	0
s__Aeromonas rivuli	159.747	570.6053823966666	670.368	0.8708775183333333	1509.6491538516666	913.2752447566668	164.24691682333335	2.30873	411.6462415616667	728.414	502.4313542433333	29.518986576666663	471.92352609131945	625.5981910362037	10.899531256666664	-5.8429	Sewage	Opportunistic or Risk-associated	Human_related	d__Bacteria	p__Pseudomonadota	c__Gammaproteobacteria	o__Enterobacterales_A	f__Aeromonadaceae	g__Aeromonas	0	9.14293	0	0	0	0	0	0	0	0	0	0	0	0	0	0	0	0	0	0
s__Acinetobacter tandoii	240.568	368.3226820750001	317.485	0.5176764133333333	835.925	430.733	794.5922346566667	4.566499451666666	1288.0592721416667	705.853	517.325	73.48915284666667	464.7864228654167	610.9848606303705	26.191109570555557	-4.54399	NS	Opportunistic or Risk-associated	Human_related	d__Bacteria	p__Pseudomonadota	c__Gammaproteobacteria	o__Pseudomonadales	f__Moraxellaceae	g__Acinetobacter	274.83	40.8258	0	25.6958	0	6.44988	0	0	0	0	0	0	0	13.6911	0	0	0	0	0	0
s__Dialister invisus	259.1937798366667	526.6983944183334	248.96092264666663	0	958.2525299433332	946.4654649333334	179.76956545383334	0	536.561	1729.25	163.67270422166666	3.19567	462.6684556433194	616.536200120537	1.0652222116666663	-9.17689	Sewage	SCFA-producing fermenters	Human_related	d__Bacteria	p__Bacillota_C	c__Negativicutes	o__Veillonellales	f__Dialisteraceae	g__Dialister	14.8745	54.0071	61.6082	0	77.7335	0	95.0805	0	0	0	0	0	0	0	6.26774	0	0	31.9936	0	0
s__Acinetobacter idrijaensis	159.36346394166668	297.4393979916667	207.69685835833337	2.7387551533333334	1170.5090438883333	331.215	542.3327275483333	7.26262	1794.948420623333	595.59	413.84607095166666	45.505200386666665	464.0373015127778	612.5490043609259	18.502192968333333	-5.04906	Sewage	Opportunistic or Risk-associated	Human_related	d__Bacteria	p__Pseudomonadota	c__Gammaproteobacteria	o__Pseudomonadales	f__Moraxellaceae	g__Acinetobacter	25.4066	0	0	117.207	0	27.3647	0	19.0727	0	17.8804	0	0	0	0	0	0	0	0	0	0
s__Pseudocitrobacter vendiensis	283.07482607416665	275.296	371.7047197416667	8.48063	1989.1317564916665	715.3813569499999	263.544	30.935072633333338	525.913	564.2926339483333	350.827	62.79672646333333	453.44809714395825	593.2405261350928	34.07081017055555	-4.12201	NS	Opportunistic or Risk-associated	Human_related							8.32163	0	0	0	0	0	0	0	0	0	0	0	0	0	0	0	0	0	0	0
s__Barnesiella intestinihominis	920.8518738483334	635.2263555811668	251.90654450499997	0	637.5820224838334	825.8332593716667	203.48692874466667	0	920.333	245.10248789333332	131.1298569666667	3.490616873333334	397.91187518358333	530.1613205921852	1.163538957777778	-8.83177	Sewage	SCFA-producing fermenters	Human_related	d__Bacteria	p__Bacteroidota	c__Bacteroidia	o__Bacteroidales	f__Barnesiellaceae	g__Barnesiella	0	25.6076	0	0	0	0	0	0	0	0	0	0	0	0	0	0	19.2937	0	0	0
s__Accumulibacter necessarius	11.593799398333331	5.078169196666667	6.470052933333334	1879.9909655316667	2.2610266033333333	3.9532893516666663	26.70016117333333	3567.965739001667	2.3179397533333335	12.54331381166667	80.92412027499999	76.44592049166667	473.02037479347223	16.871319166296296	1841.47	6.770139375547475	BTB	WWTP Core Functional	Non_Human_related	d__Bacteria	p__Pseudomonadota	c__Gammaproteobacteria	o__Burkholderiales	f__Rhodocyclaceae	g__Accumulibacter	22.6686	27.8841	67.6994	0	16.5548	0	0	0	0	0	0	0	0	0	13.884	0	0	3.27458	0	0
s__Acinetobacter piscicola_A	211.645	428.3701101033334	386.928	0.7354661783333333	638.384	352.71974803833336	748.478	3.2787598600000005	1172.77	816.1877086481667	632.5716305766666	50.9906	453.5884392499861	598.6729409290556	18.334934212777775	-5.0291	Sewage	Opportunistic or Risk-associated	Human_related	d__Bacteria	p__Pseudomonadota	c__Gammaproteobacteria	o__Pseudomonadales	f__Moraxellaceae	g__Acinetobacter	482.689	0	0	16.4114	0	23.6902	4.77341	0	0	0	0	0	0	0	0	0	0	0	0	0
s__Blautia_A massiliensis	409.385	1708.7888106133332	249.02788198666667	0.0832092666666666	646.4966629883334	864.659	129.569	0.0668595333333333	555.136	608.3870876743333	60.28656987333333	2.748525706666667	436.2196000344722	581.304	0.966198168888889	-9.23276	Sewage	SCFA-producing fermenters	Human_related	d__Bacteria	p__Bacillota_A	c__Clostridia	o__Lachnospirales	f__Lachnospiraceae	g__Blautia_A	0	0	0	0	0	0	0	0	0	0	0	0	10.8407	0	0	0	0	0	0	0
s__Comamonas testosteroni	329.123	253.96	51.718657046666664	1.2448000033333333	1226.7427945749998	238.755	1350.16	9.910423673333334	1667.369454311667	86.7452	79.53869286666666	10.545211206666666	442.15121764256946	587.1237974252778	7.233478294444445	-6.34283	Sewage	WWTP Core Functional	Non_Human_related	d__Bacteria	p__Pseudomonadota	c__Gammaproteobacteria	o__Burkholderiales	f__Burkholderiaceae_B	g__Comamonas	0	0	31.9101	0	0	0	0	0	0	0	0	0	0	0	0	0	0	0	0	0
s__Acinetobacter sichuanensis	168.76	328.262	293.46586861833333	1.6484476816666664	971.1989089816668	282.76662240666667	605.4502271316667	6.066621163333333	1423.69	691.9044150833333	538.1414054783334	74.2596	448.8015627397917	589.2937821908333	27.32490438666667	-4.4307	NS	Opportunistic or Risk-associated	Human_related	d__Bacteria	p__Pseudomonadota	c__Gammaproteobacteria	o__Pseudomonadales	f__Moraxellaceae	g__Acinetobacter	0	0	13.3745	48.544	0	4.88341	12.5071	0	3.31579	0	322.48	0	0	0	0	0	0	12.5442	0	0
s__Bacteroides eggerthii	680.475	340.12960945333333	150.79060951666665	0.1418979966666666	1055.1474251716666	1022.2253764183332	233.79920061816668	0.7435961600000001	837.2090108516667	471.23348855833336	62.2296	1.1333167366666668	404.6048403592916	539.2488081575741	0.6729369644444444	-9.64626	Sewage	SCFA-producing fermenters	Human_related	d__Bacteria	p__Bacteroidota	c__Bacteroidia	o__Bacteroidales	f__Bacteroidaceae	g__Bacteroides	0	40.4898	0	0	0	0	0	0	0	10.0679	0	0	0	0	1.36496	137.206	22.8262	0	0	0
s__Methylophosphatis roskildensis	15.053496800833331	7.39099	5.17664	5329.224618053333	3.09238	8.795018149999999	20.224994916666667	27.5443	0.3938865283333333	7.834861566666667	4.384386731666667	3.3895989849999997	452.7087634210416	8.038517246018518	1786.7195019461108	7.796168035205695	BTB	Unclassified	Unclassified	d__Bacteria	p__Pseudomonadota	c__Gammaproteobacteria	o__Burkholderiales	f__Rhodocyclaceae	g__Methylophosphatis	51.4769	61.5096	123.368	0	45.6638	0	30.3142	0	0	0	0	0	0	0	0	0	0	0	0	0
s__Comamonas suwonensis	168.66515810583334	831.3405332133334	327.52992299833335	2.36812	490.07040702166665	89.01852066166667	1929.45	14.519821158333334	475.47174958666665	269.84575048833335	613.4433622133333	53.18215836666667	438.742429964514	577.2043397521296	23.35670060166667	-4.62717	NS	WWTP Core Functional	Non_Human_related	d__Bacteria	p__Pseudomonadota	c__Gammaproteobacteria	o__Burkholderiales	f__Burkholderiaceae_B	g__Comamonas	2.36583	0	27.7295	0	3.75037	2.79203	0	0	0	71.3657	136.947	0	0	10.4286	5.14644	0	0	0	0	0
s__Phosphoribacter baldrii	16.296496635833332	1.2145669583333334	0.2367351416666666	3054.1366630366665	0.1496834016666667	0.1392918166666666	1.1880233383333334	2314.6644492866667	0.999306	0.955672	1.2568294666666666	0.759436	449.3330961760417	2.4929561599074073	1789.8535162244443	9.487768292082642	BTB	WWTP Core Functional	Non_Human_related	d__Bacteria	p__Actinomycetota	c__Actinomycetia	o__Actinomycetales	f__Dermatophilaceae	g__Phosphoribacter	35.1274	56.98	45.7491	0	0	0	0	0	0	0	15.774	0	0	0	0	0	0	0	0	0
s__Vitreoscilla massiliensis	544.4006092608333	513.8	201.00627633666667	0	75.40798958333333	74.70304160333333	129.234	3.1434926599999997	71.98039718333332	2891.965852043333	298.2838992716667	3.539394891666667	400.6220757840138	533.4202246507223	2.227629183888889	-7.90362	Sewage	WWTP Core Functional	Non_Human_related	d__Bacteria	p__Pseudomonadota	c__Gammaproteobacteria	o__Burkholderiales	f__Neisseriaceae	g__Vitreoscilla	3.19308	25.7613	0	65.8217	0	23.028	34.4309	0	0	0	0	0	0	0	22.5303	0	0	10.3963	0	0
s__Propionivibrio dominans	41.72855926583333	25.4613	54.071409028333335	2104.6721280266665	6.162535823333333	12.3504	140.371	2771.238755891666	0.6007337899999999	77.85600246333333	31.9998	21.488271873333332	440.6667409322916	43.400192821759255	1632.4663852638887	5.233208022335764	BTB	WWTP Core Functional	Non_Human_related	d__Bacteria	p__Pseudomonadota	c__Gammaproteobacteria	o__Burkholderiales	f__Rhodocyclaceae	g__Propionivibrio	6.76022	14.6821	27.6209	0	16.4552	11.0688	0	17.7759	0	0	0	0	0	0	0	0	0	0	0	0
s__Acinetobacter fasciculus	264.7230754483333	328.11046672000003	274.1985280633333	1.80043	676.7117268733333	340.3619362233333	558.9552819483333	4.3938198250000005	1449.0184782816668	644.0293407966667	438.4954986983333	31.605173848333337	417.70031320347215	552.7338147837037	12.59980846277778	-5.45511	Sewage	Opportunistic or Risk-associated	Human_related	d__Bacteria	p__Pseudomonadota	c__Gammaproteobacteria	o__Pseudomonadales	f__Moraxellaceae	g__Acinetobacter	300.63	0	0	0	0	51.7218	0	0	0	0	0	0	0	0	0	0	0	0	0	0
s__Acetatifactor intestinalis	397.3846154016667	203.51679468166665	97.02803558833334	0	1283.4290963683334	828.2065656716667	300.79876830333336	0	940.092	793.5550145583334	20.95807579166667	1.3796036833333334	405.5290717061111	540.5521396433334	0.4598678944444445	-10.199	Sewage	SCFA-producing fermenters	Human_related	d__Bacteria	p__Bacillota_A	c__Clostridia	o__Lachnospirales	f__Lachnospiraceae	g__Acetatifactor	0	35.0718	54.6589	33.4694	25.7641	0	0	0	0	0	0	0	0	0	0	0	0	0	0	0
s__Alistipes communis	654.6146223141667	287.15004377099996	160.46586833333333	0.6511679666666667	742.6961663850001	929.713	225.29	1.7931373516666664	669.851	785.5967224291667	139.34077489666666	4.246966143333333	383.450727150125	510.5241615933148	2.2304238205555555	-7.83852	Sewage	SCFA-producing fermenters	Human_related	d__Bacteria	p__Bacteroidota	c__Bacteroidia	o__Bacteroidales	f__Rikenellaceae	g__Alistipes	0	0	16.6054	0	0	15.1383	0	0	0	0	0	0	0	0	0	0	0	0	0	0
s__Brevundimonas bullata	1653.5446489191663	56.09554403833334	155.84658832666668	7.517307213333333	113.84099644666668	110.30973717333336	75.84643764166667	10.4594	929.362	370.155	60.7778	27.892706223333334	297.637293505625	391.7531199450926	15.289814187222222	-4.6793	Sewage	Unclassified	Unclassified	d__Bacteria	p__Pseudomonadota	c__Alphaproteobacteria	o__Caulobacterales	f__Caulobacteraceae	g__Brevundimonas	19.9849	0	0	0	0	0	0	0	0	0	0	0	0	0	0	0	0	0	0	0
s__Acinetobacter lwoffii_D	178.823	349.15857392666663	277.3641296966667	0.8871884883333333	642.3631078483334	284.008	508.2443279716667	3.48666	1509.85	722.5640881516666	476.0272794466666	42.40490273333334	416.2650480781944	549.8224253451851	15.592916277222225	-5.14	Sewage	Opportunistic or Risk-associated	Human_related	d__Bacteria	p__Pseudomonadota	c__Gammaproteobacteria	o__Pseudomonadales	f__Moraxellaceae	g__Acinetobacter	67.43	0	0	35.5474	0	45.4307	0	0	0	124.723	0	0	0	0	0	0	0	0	0	0
s__Alistipes finegoldii	875.9797930983333	427.108	183.49130310833337	0.2578302333333333	288.19714100666664	473.3962371049999	131.32872421783335	0.2959089933333333	898.313	827.278	138.75798257833333	46.5504	357.57959537959715	471.5389986476111	15.701385575555555	-4.90841	Sewage	SCFA-producing fermenters	Human_related	d__Bacteria	p__Bacteroidota	c__Bacteroidia	o__Bacteroidales	f__Rikenellaceae	g__Alistipes	0	0	0	0	29.854	0	0	0	0	0	0	0	0	0	0	0	0	0	0	0
s__Prevotella copri	481.61643129333333	462.016	303.964	0.35108	837.1707392033333	1076.4911513133334	331.01693964000003	0.5878337933333334	531.3709424733333	483.8902651033334	145.071	6.531483256666667	388.3398939830555	516.9564811768519	2.4901324016666666	-7.69768	Sewage	Opportunistic or Risk-associated	Human_related	d__Bacteria	p__Bacteroidota	c__Bacteroidia	o__Bacteroidales	f__Bacteroidaceae	g__Prevotella	46.5751	7.20147	0	81.7291	118.897	0	0	0	8.22123	671.22	0	0	0	0	0	0	0	0	0	0
s__Alistipes shahii	978.8980088316666	474.2350248701667	209.73120129166668	0.1418170916666666	591.791	556.548	190.38817935766667	1.39191	650.8173894633334	382.04	118.55916451166668	0.7638242366666667	346.275490934625	461.4453709207962	0.7658509761111111	-9.23488	Sewage	SCFA-producing fermenters	Human_related	d__Bacteria	p__Bacteroidota	c__Bacteroidia	o__Bacteroidales	f__Rikenellaceae	g__Alistipes	0	0	0	17.6335	20.6668	0	0	0	0	0	0	0	0	0	0	0	0	0	0	0
s__Roseburia intestinalis	385.46603341166673	270.09498237316666	62.94315351666666	0	1364.916954348333	1087.9718902416666	314.463	0	737.966	450.591	57.06207211666666	2.3459649516666667	394.4850917737361	525.7194595925741	0.7819883172222223	-9.39293	Sewage	SCFA-producing fermenters	Human_related	d__Bacteria	p__Bacillota_A	c__Clostridia	o__Lachnospirales	f__Lachnospiraceae	g__Roseburia	48.6209	67.1326	21.0784	0	59.8757	9.5601	0	0	0	0	0	0	0	0	0	0	0	66.4691	0	0
s__Acinetobacter towneri_A	327.3985177883333	312.03014185166666	263.15737877833334	0.2021806083333333	645.6494842883334	369.2449962166667	809.3619387966668	3.022882671666667	887.2364472200001	672.252	375.1235461633334	117.79565780666668	398.54	517.9394317292594	40.340240362222225	-3.68249	NS	Opportunistic or Risk-associated	Human_related	d__Bacteria	p__Pseudomonadota	c__Gammaproteobacteria	o__Pseudomonadales	f__Moraxellaceae	g__Acinetobacter	227.668	43.9891	165.032	51.8963	0	0	36.9647	0	0	0	0	0	0	0	7.03405	0	0	0	0	0
s__Comamonas acidovorans	330.70594760833336	362.06680651333335	50.84959506333333	7.64579	993.7165934016666	102.88747904833332	150.23575481833333	17.440366173333334	2361.1863709883332	196.962	73.26778125333333	35.9325	390.24142802252777	513.5420546507778	20.33954813777778	-4.65812	Sewage	WWTP Core Functional	Non_Human_related	d__Bacteria	p__Pseudomonadota	c__Gammaproteobacteria	o__Burkholderiales	f__Burkholderiaceae_B	g__Comamonas	0	0	5.96289	0	0	0	0	0	0	0	0	0	0	0	0	0	0	0	0	0
s__Prevotella copri_D	474.93015108583336	473.0519176748333	300.25665743166667	0	864.1353904366666	1069.92	322.674	0.220332	466.2875621416667	410.6848894766667	122.44302704333334	1.3970698300000002	375.4999090875554	500.4868341022962	0.5391340433333334	-9.85847	Sewage	Opportunistic or Risk-associated	Human_related	d__Bacteria	p__Bacteroidota	c__Bacteroidia	o__Bacteroidales	f__Bacteroidaceae	g__Prevotella	0	0	0	68.2196	0	245.531	0	0	0	20.3103	12.2059	0	0	0	0	0	0	0	0	0
s__Azonexus agitatus	308.1414164566667	569.1830384633333	367.2545410116666	45.8681	168.13776998666663	637.164	1815.6873375633331	225.027	72.6767	150.07017366483333	194.22399333666667	57.91466370333333	384.2790821817917	475.8376609625741	109.60334583944444	-2.11818	BTB	WWTP Core Functional	Non_Human_related	d__Bacteria	p__Pseudomonadota	c__Gammaproteobacteria	o__Burkholderiales	f__Rhodocyclaceae	g__Azonexus	0	42.3369	0	0	0	0	0	0	0	0	0	0	0	0	0	0	0	0	0	0
s__Ottowia oryzae	1373.1786703733333	48.92987964666667	33.363756439999996	15.2423	112.64749463833331	189.43	59.21299016966666	241.87044476666665	1270.4184719066666	111.593	33.095427191666666	38.13602332333333	293.92652983927775	359.096622974037	98.4163	-1.8674	BTB	WWTP Core Functional	Non_Human_related	d__Bacteria	p__Pseudomonadota	c__Gammaproteobacteria	o__Burkholderiales	f__Burkholderiaceae_B	g__Ottowia	49.8318	54.1711	21.5569	0	0	0	20.8579	0	0	0	0	0	0	0	0	0	0	0	0	0
s__Phocaeicola massiliensis	307.41861459166665	203.08239313833337	117.38568139333334	0	1050.4995160383337	1418.9760016283333	255.61860748333336	0.0800561716666666	472.609	632.7374863413334	83.97958832166667	4.408055153333334	378.89955649344455	504.7007296218149	1.4960371083333337	-8.39814	Sewage	SCFA-producing fermenters	Human_related	d__Bacteria	p__Bacteroidota	c__Bacteroidia	o__Bacteroidales	f__Bacteroidaceae	g__Phocaeicola	13.4479	55.8421	39.4244	72.4291	0	0	11.6598	0	110.746	10.4026	0	0	0	0	0	0	0	0	0	0
s__Pseudomonas_E shahriarae	570.4116088458334	289.4319640516666	568.5016963699999	0.3264884216666666	10.4998	82.03055080166666	7.58854	2.90256	2406.0856742133333	266.00342797666667	65.19517715333333	9.847929763333331	356.5687846472916	473.97204836472224	4.358993494999999	-6.76466	Sewage	Opportunistic or Risk-associated	Unclassified	d__Bacteria	p__Pseudomonadota	c__Gammaproteobacteria	o__Pseudomonadales	f__Pseudomonadaceae	g__Pseudomonas_E	0	0	56.3608	35.7831	0	0	0	0	0	51.4559	0	0	0	15.5102	0	0	0	0	0	0
s__Vescimonas coprocola	500.13803534416667	327.186	80.88382205333333	1.1174997816666667	631.8123529266667	455.18057848666666	123.77401999666668	10.427853516666667	635.2420621633333	1364.5864591416666	97.04832051666666	2.977921393333333	352.5312484180695	468.427967369463	4.841091563888889	-6.59635	Sewage	SCFA-producing fermenters	Human_related	d__Bacteria	p__Bacillota_A	c__Clostridia	o__Oscillospirales	f__Oscillospiraceae	g__Vescimonas	0	0	39.7258	31.4668	0	0	5.61414	0	0	0	0	0	0	0	0	0	0	0	0	0
s__Acidovorax facilis	556.1069125741667	388.54409238499994	327.19056089500003	46.131329558333334	267.175	228.18213763166668	362.405	180.879	339.297	611.1514674683333	450.5388320516667	397.69833795333335	346.27496339937494	392.2878606762037	208.2362715688889	-0.913691	BTB	WWTP Core Functional	Non_Human_related	d__Bacteria	p__Pseudomonadota	c__Gammaproteobacteria	o__Burkholderiales	f__Burkholderiaceae_B	g__Acidovorax	0	10.8414	0	84.3465	0	0	0	0	74.4771	0	0	0	0	0	0	4.64244	0	0	0	0
s__Psychrobacter faecalis	1.1394397266666667	1079.53	309.49	0	7.187082391666666	4.120536733333333	68.12297539833334	0.5664268133333333	6.716552683333333	2747.08	474.2856242283333	7.59253	392.15244199541667	521.9633718557408	2.7196524144444445	-7.58438	Sewage	Unclassified	Unclassified	d__Bacteria	p__Pseudomonadota	c__Gammaproteobacteria	o__Pseudomonadales	f__Moraxellaceae	g__Psychrobacter	56.6431	9.57872	0	0	0	17.8695	0	0	7.30232	0	0	0	0	0	0	0	0	0	0	0
s__Aeromonas veronii_A	80.38630449583333	448.2341286835001	484.819	1.5418	1569.0259990533334	1145.35	145.64172652333335	7.927703168333333	140.45349282499998	333.02764081333333	237.60629428833332	21.0244	384.586	509.3937561847408	10.16464331777778	-5.64715	Sewage	Opportunistic or Risk-associated	Human_related	d__Bacteria	p__Pseudomonadota	c__Gammaproteobacteria	o__Enterobacterales_A	f__Aeromonadaceae	g__Aeromonas	0	0	0	0	0	0	0	0	0	0	0	0	0	0	0	0	0	11.1122	0	0
s__Aeromonas dhakensis	138.80960669750002	1168.7	402.557	1.17855	1746.9848592516666	494.449	75.44226622166667	0.944005	314.6098411166667	120.138	73.40326913166666	3.554773238333334	378.39788142812495	503.89969425046297	1.892442961111111	-8.05674	Sewage	Opportunistic or Risk-associated	Human_related	d__Bacteria	p__Pseudomonadota	c__Gammaproteobacteria	o__Enterobacterales_A	f__Aeromonadaceae	g__Aeromonas	0	18.3821	0	0	0	50.3514	0	0	6.45073	0	0	0	0	0	0	0	0	0	0	84.7758
s__Shewanella xiamenensis	94.33570931916668	2127.673395753334	1563.9145687500002	0	120.49034877333332	76.9769	9.272355911666669	0	7.341855631666667	461.9197401788333	95.8559	22.490370043333332	381.68926159552785	506.420085455889	7.496790014444444	-6.07792	Sewage	Unclassified	Unclassified	d__Bacteria	p__Pseudomonadota	c__Gammaproteobacteria	o__Enterobacterales_A	f__Shewanellaceae	g__Shewanella	12.3966	20.1611	0	0	0	0	0	0	0	55.7726	0	0	0	0	0	0	0	0	0	1.86029
s__Acinetobacter portensis	133.678	327.1174880116667	258.29397852666665	1.48852	551.248	310.08789627166664	542.1642079266667	5.536749023333333	1233.2040138183334	600.2550949283333	500.03449063166664	55.71775667166667	376.5688616014583	495.1203685224999	20.914340838333334	-4.56521	NS	Opportunistic or Risk-associated	Human_related	d__Bacteria	p__Pseudomonadota	c__Gammaproteobacteria	o__Pseudomonadales	f__Moraxellaceae	g__Acinetobacter	101.239	0	0	25.9842	0	25.9842	0	0	0	0	0	0	0	0	0	0	0	0	0	0
s__Lachnospira rogosae	299.34706612083335	154.71223886333334	76.58684708333334	0	896.299	1233.7697895516667	167.88091578066667	0.0821264716666666	482.9744345166667	973.5884680516666	57.079291618333336	2.1038050233333334	362.0353626884168	482.4709356406668	0.7286438316666667	-9.37101	Sewage	SCFA-producing fermenters	Human_related	d__Bacteria	p__Bacillota_A	c__Clostridia	o__Lachnospirales	f__Lachnospiraceae	g__Lachnospira	5.28767	21.9575	36.311	0	0	0	0	0	0	0	0	0	0	0	0	0	0	0	0	0
s__Odoribacter splanchnicus	619.176	414.79497332616666	142.00259213333334	0	610.7978702133333	543.9060680833334	199.672	0	1017.0741924216668	357.32741806099995	54.89693697166666	4.560263991666667	330.3506931368472	439.9608948500556	1.5200879972222223	-8.17708	Sewage	SCFA-producing fermenters	Human_related	d__Bacteria	p__Bacteroidota	c__Bacteroidia	o__Bacteroidales	f__Marinifilaceae	g__Odoribacter	0	1.91806	0	0	8.92791	0	23.5704	0	0	23.5311	0	0	0	0	0	18.4699	0	0	0	0
s__Aliarcobacter thereius	581.946	777.0551257349999	874.4184543199999	0.0850535	225.94678057833335	600.152	231.86477122833332	0.122621	1.6862037016666669	479.0281987166666	190.04009298333335	2.55234	330.4081435081944	440.2375227042593	0.920006	-8.90242	Sewage	Opportunistic or Risk-associated	Human_related	d__Bacteria	p__Campylobacterota	c__Campylobacteria	o__Campylobacterales	f__Arcobacteraceae	g__Aliarcobacter	0	146.93	0	447.945	0	25.7228	0	0	29.1188	0	158.874	0	117.867	0	0	87.5415	15.2479	107.499	0	0
s__Sutterella wadsworthensis	528.0577324708333	363.681	125.32732057666664	1.3569363133333334	181.12	483.72202511000006	61.67400404666666	0.5006817533333333	861.903	1299.98	77.46234635166667	5.081627253333333	332.48872165631946	442.54726828398145	2.3130817733333333	-7.57987	Sewage	SCFA-producing fermenters	Human_related	d__Bacteria	p__Pseudomonadota	c__Gammaproteobacteria	o__Burkholderiales	f__Burkholderiaceae_A	g__Sutterella	0	0	0	0	0	0	0	1.6898	0	0	0	0	0	0	0	0	0	0	0	0
s__Acinetobacter ursingii	157.36141579916668	309.36666158833333	240.882	1.1536333433333334	463.845	306.195	492.09790890666665	3.9129022916666663	1415.392883191667	531.0141282133333	362.2722410833333	62.80368829166667	362.1914484524305	475.3807952780556	22.623407975555555	-4.3932	NS	Opportunistic or Risk-associated	Human_related	d__Bacteria	p__Pseudomonadota	c__Gammaproteobacteria	o__Pseudomonadales	f__Moraxellaceae	g__Acinetobacter	0	40.6945	0	0	0	40.2613	0	9.82553	0	0	0	0	0	0	0	0	0	0	0	0
s__Flavobacterium proteolyticum	547.028	579.7074958133334	355.3353142833334	0.0365147033333333	335.9321951133333	101.80865921333331	686.2561840933332	3.74196	65.1037	259.70228037333334	537.7143766766667	435.23742081666666	325.63367250138896	385.398685637963	146.33863309166665	-1.39704	BTB	Unclassified	Unclassified	d__Bacteria	p__Bacteroidota	c__Bacteroidia	o__Flavobacteriales	f__Flavobacteriaceae	g__Flavobacterium	75.1759	0	0	0	0	0	0	0	0	0	0	0	0	0	0	0	0	0	0	0
s__Aeromonas molluscorum	107.96381955833334	481.12945090166664	646.7982762066666	2.0867309966666667	971.3773128716666	790.0867427833333	125.49339674833334	2.291985793333333	247.77692962333336	539.618	369.9596873633334	41.50772404833333	360.50746892624994	475.5781318085185	15.295480279444442	-4.95851	Sewage	Opportunistic or Risk-associated	Human_related	d__Bacteria	p__Pseudomonadota	c__Gammaproteobacteria	o__Enterobacterales_A	f__Aeromonadaceae	g__Aeromonas	0	2.63465	0	121.656	0	116.784	0	0	0	0	0	0	0	0	0	0	0	0	36.719	0
s__Acinetobacter defluvii	99.12053127083334	181.79561847833335	203.768	3.2642157066666666	523.766	145.48075819166667	384.6912114583333	7.041829133333333	2184.23	301.50035645400004	235.143	48.16788333333333	359.8310474980417	473.2776268670185	19.49130939111111	-4.60178	NS	Opportunistic or Risk-associated	Human_related	d__Bacteria	p__Pseudomonadota	c__Gammaproteobacteria	o__Pseudomonadales	f__Moraxellaceae	g__Acinetobacter	5.44182	37.2425	0	0	0	14.5812	0	0	0	0	134.966	0	0	0	0	0	0	0	0	0
s__Casimicrobium huifangae	13.072172578333332	6.1738260616666665	4.689824973333334	12.904505973333334	6.045739058333333	4.318479346666667	16.4007	4292.141977216666	2.43298	4.4734978283333335	3.6940593016666665	11.5494	364.82475780152777	6.811247626481482	1438.8652883266666	7.722796729558315	BTB	Unclassified	Unclassified	d__Bacteria	p__Pseudomonadota	c__Gammaproteobacteria	o__Burkholderiales	f__Casimicrobiaceae	g__Casimicrobium	42.7122	8.94015	130.307	0	0	26.8928	0	0	0	0	0	0	0	0	0	0	0	0	0	0
s__Bacteroides fragilis	556.9803023691667	313.3639099893333	155.75313129333333	0	312.0029252483333	382.93219124333336	65.77596855666667	0	1686.518977878333	312.35007690966665	38.1987	6.65712	319.21110863234725	424.8751315309074	2.219039936666667	-7.58096	Sewage	SCFA-producing fermenters	Human_related	d__Bacteria	p__Bacteroidota	c__Bacteroidia	o__Bacteroidales	f__Bacteroidaceae	g__Bacteroides	0	20.5291	0	0	11.3336	0	0	0	0	12.7115	18.2823	0	0	0	9.30318	0	18.8949	0	0	0
s__Bilophila wadsworthia	482.43363301916673	272.42790697416666	106.28576979666668	0.5237724383333333	835.697	721.5863223316666	50.30655522166666	0.2447762233333333	393.7824553983333	985.5543901963332	40.676413876666665	4.752260916666667	324.523	432.08340864551855	1.8402698594444444	-7.87525	Sewage	SCFA-producing fermenters	Human_related	d__Bacteria	p__Desulfobacterota	c__Desulfovibrionia	o__Desulfovibrionales	f__Desulfovibrionaceae	g__Bilophila	0	0	0	0	0	0	0	0	0	0	0	0	0	0	0	0	0	0	0	0
s__Acinetobacter baumannii_B	162.33728006916667	206.01762410666663	164.66379987666667	0.505405	704.5885128516667	351.53254525666665	516.087	5.633597118333333	991.618	640.4436707016666	394.478	53.83803137833333	349.31194047284725	459.0851391025001	19.99234458388889	-4.52124	NS	Opportunistic or Risk-associated	Human_related	d__Bacteria	p__Pseudomonadota	c__Gammaproteobacteria	o__Pseudomonadales	f__Moraxellaceae	g__Acinetobacter	0	19.4539	0	30.5362	0	0	0	0	21.0254	0	0	0	0	0	0	18.6614	0	0	0	22.841
s__Phocaeicola coprophilus	307.24506206166666	162.23851626833334	103.43107015166667	0.6809486166666666	994.708	1287.1656246683333	250.60670766166663	1.9158047133333336	412.0867975533333	365.8613743821666	83.83772565666666	10.976863006666669	331.7295038017083	440.7978254759814	4.52453877888889	-6.6062	Sewage	SCFA-producing fermenters	Human_related	d__Bacteria	p__Bacteroidota	c__Bacteroidia	o__Bacteroidales	f__Bacteroidaceae	g__Phocaeicola	0	10.2318	0	0	0	0	0	0	0	11.3553	0	0	0	0	0	0	0	0	0	0
s__Azonexus phosphoritropha	40.26509201333334	41.288872063333336	49.6097	1579.5574859216667	58.610731718333334	81.09675944166668	115.607	1555.39	20.665767821666662	64.67923530333333	283.71390364166666	349.2917738133333	353.3146635065278	83.94860997814814	1161.4128240916666	3.7902306217520856	BTB	WWTP Core Functional	Non_Human_related	d__Bacteria	p__Pseudomonadota	c__Gammaproteobacteria	o__Burkholderiales	f__Rhodocyclaceae	g__Azonexus	14.4634	0	55.4186	0	0	0	0	0	0	0	0	0	0	0	0	0	0	3.84872	0	0
s__Mediterraneibacter faecis	254.05551939916668	1044.7565040033332	111.84907640666668	0.0274790983333333	545.815	724.4853786616667	96.07305317666668	0.1037291266666666	613.424	523.818	36.035431159999995	1.8150701766666664	329.35493131330554	438.924	0.6487594672222221	-9.40207	Sewage	SCFA-producing fermenters	Human_related	d__Bacteria	p__Bacillota_A	c__Clostridia	o__Lachnospirales	f__Lachnospiraceae	g__Mediterraneibacter	0	0	14.3673	0	0	17.4905	0	0	0	0	0	0	0	0	0	0	0	2.00009	0	0
s__Coprococcus eutactus_A	590.5925298708333	824.7913933666667	146.24697135666668	0	423.4970272866667	449.5706706816666	171.942	0	593.762	358.4091033106667	42.47024495666667	0.5582385483333333	300.15336112901394	400.1424549999815	0.1860795161111111	-11.0704	Sewage	SCFA-producing fermenters	Human_related	d__Bacteria	p__Bacillota_A	c__Clostridia	o__Lachnospirales	f__Lachnospiraceae	g__Coprococcus	0	16.8975	2.2605	0	0	0	0	0	0	0	0	0	0	0	0	0	0	0	0	0
s__Enterobacter mori	26.1922	428.4476998766667	430.04105626166665	0	2341.3254205233334	340.22027822666666	51.444289032166665	0	151.81504888166668	317.975	65.313	0.0973729366666666	346.0725832149028	461.4192917380185	0.0324576455555555	-13.7952	Sewage	Opportunistic or Risk-associated	Human_related	d__Bacteria	p__Pseudomonadota	c__Gammaproteobacteria	o__Enterobacterales	f__Enterobacteriaceae	g__Enterobacter	0	0	17.3656	0	0	0	0	15.0527	0	0	0	0	0	0	0	0	0	0	0	0
s__Undibacterium aquatile	2.38509	2.7110519866666665	4.313712416666667	1.6530713516666669	6.057269940666667	47.315205806666675	2993.013061758333	9.03481	3.998730188333333	1.79252	597.9397715916667	492.71671675166664	346.9109170760278	406.6140454421111	167.80153197777778	-1.2769	BTB	WWTP Core Functional	Non_Human_related	d__Bacteria	p__Pseudomonadota	c__Gammaproteobacteria	o__Burkholderiales	f__Burkholderiaceae	g__Undibacterium	0	0	86.3675	0	0	0	0	0	0	0	0	0	0	0	0	0	0	0	0	0
s__Aeromonas sanarellii	104.75553136666667	440.9320969150001	606.85	0.9130793633333332	1020.15	862.1133342016666	165.58674003500002	1.04255	118.96150666166666	395.88601102666667	311.1470553533333	17.805290138333334	337.1783995172222	447.37554127111105	6.586974255555556	-6.08573	Sewage	Opportunistic or Risk-associated	Human_related	d__Bacteria	p__Pseudomonadota	c__Gammaproteobacteria	o__Enterobacterales_A	f__Aeromonadaceae	g__Aeromonas	0	30.2179	0	54.1124	0	0	0	0	0	0	0	0	0	0	0	36.664	0	0	0	0
s__Sphaerotilus sulfidivorans	1094.1710412366667	73.62634533666666	69.3009	30.6443	168.44065626666665	19.87765251833333	1305.6562628616666	47.93	21.549678413333336	20.454863524999997	38.00869381333333	128.88562953833335	251.546	312.3429003135185	69.15330444944445	-2.17526	BTB	WWTP Core Functional	Non_Human_related	d__Bacteria	p__Pseudomonadota	c__Gammaproteobacteria	o__Burkholderiales	f__Burkholderiaceae_B	g__Sphaerotilus	69.0245	22.2792	62.8285	27.4791	0	0	17.9197	0	22.7101	0	0	0	0	0	0	0	3.68377	0	0	0
s__Aliarcobacter lacus	514.0039692199999	727.2356603100001	924.9291468983332	0.2224495383333333	261.34536958166666	436.1831121733333	232.05337376383332	0.2974083133333333	13.055696573333334	312.32211468366665	162.06551395833333	7.299988641666666	299.25115030465275	398.13266190694446	2.606615497777778	-7.25493	Sewage	Opportunistic or Risk-associated	Human_related	d__Bacteria	p__Campylobacterota	c__Campylobacteria	o__Campylobacterales	f__Arcobacteraceae	g__Aliarcobacter	21.4055	0	0	38.3165	0	10.679	0	0	78.8646	312.248	0	0	125.658	0	0	0	0	0	0	0
s__Lachnospira eligens_A	281.81134604416667	141.981	65.49357885666667	0	926.0449665266666	1063.7286030283333	164.77509250283336	0	524.1403678766667	607.2360221158333	34.083627058333335	1.8610148366666663	317.5962817084306	423.2549295182778	0.6203382788888888	-9.41426	Sewage	SCFA-producing fermenters	Human_related	d__Bacteria	p__Bacillota_A	c__Clostridia	o__Lachnospirales	f__Lachnospiraceae	g__Lachnospira	27.0778	112.003	23.9126	0	0	0	14.6208	0	0	14.9901	0	0	0	0	0	0	0	0	0	0
s__Acinetobacter albensis	98.92730930666666	638.0431872666667	692.5749417333333	0.1205014633333333	250.968	117.04	344.179	2.07717	714.0846262516667	594.0993795166667	354.9905094266667	178.276	332.1150059279167	422.7673864307408	60.15786441944445	-2.81304	NS	Opportunistic or Risk-associated	Human_related	d__Bacteria	p__Pseudomonadota	c__Gammaproteobacteria	o__Pseudomonadales	f__Moraxellaceae	g__Acinetobacter	0	13.5484	0	91.05	8.52314	0	0	0	0	0	101.946	0	0	0	91.05	0	0	0	0	0
s__Flavobacterium franklandianum	12.186093696666669	239.108	345.42218264666667	0	11.797160391666669	10.200913411666669	144.35650690333333	4.354973491666667	7.59093	47.7404	1352.03	1875.4791610733337	337.522	241.15948311455557	626.6113781883334	1.3775834244980958	BTB	Unclassified	Unclassified	d__Bacteria	p__Bacteroidota	c__Bacteroidia	o__Flavobacteriales	f__Flavobacteriaceae	g__Flavobacterium	75.5772	15.9715	0	0	0	0	0	0	0	7.12928	0	0	0	0	0	0	0	0	0	0
s__Acinetobacter chengduensis	269.15224207166665	253.00795749333335	218.0132234383333	0.276461	797.496	256.209	464.33707022666664	2.647458343333333	707.6693745483332	458.2292090316667	321.43087374166663	28.996994551666663	314.78884446638887	416.171691032963	10.640304766666665	-5.28957	Sewage	Opportunistic or Risk-associated	Human_related	d__Bacteria	p__Pseudomonadota	c__Gammaproteobacteria	o__Pseudomonadales	f__Moraxellaceae	g__Acinetobacter	0	0	0	0	0	0	0	0	0	0	0	0	0	0	0	0	0	0	0	0
s__Aeromonas australiensis	81.99734348833333	344.0578317366667	455.918	0.4103048983333333	1414.95	820.2106882783334	118.279	2.3802240616666666	133.875	310.37185087333336	235.211	22.31610388333333	328.332	434.98588992318514	8.368877614444443	-5.69979	Sewage	Opportunistic or Risk-associated	Human_related	d__Bacteria	p__Pseudomonadota	c__Gammaproteobacteria	o__Enterobacterales_A	f__Aeromonadaceae	g__Aeromonas	85.4921	162.86	0	69.2669	0	0	22.4522	0	48.2508	0	94.3739	0	0	15.9493	0	0	0	0	0	0
s__Acinetobacter lwoffii	212.25150248666668	286.6826776016666	201.66038667666663	2.4929480033333333	555.3273810133334	314.8	486.6735930666666	6.186205923333333	835.1366591266666	566.4587318366666	308.086	32.13874632333333	317.3246221702778	418.564173977037	13.606	-4.94314	Sewage	Opportunistic or Risk-associated	Human_related	d__Bacteria	p__Pseudomonadota	c__Gammaproteobacteria	o__Pseudomonadales	f__Moraxellaceae	g__Acinetobacter	3.6718	0	0	0	0	0	0	0	0	0	0	0	0	0	0	0	0	0	0	0
s__Lactococcus_A raffinolactis	152.74411327916667	869.2653905733333	1960.8465385783331	0.0566613483333333	29.3472	11.524094613333332	60.7703	0	283.3441130416667	21.994336646833336	422.42503173333336	2.563600238333333	317.9067777835556	423.5845635351111	0.8734205288888889	-8.92176	Sewage	Unclassified	Unclassified	d__Bacteria	p__Bacillota	c__Bacilli	o__Lactobacillales	f__Streptococcaceae	g__Lactococcus_A	14.9034	65.1112	34.5717	12.0155	0	30.6527	0	0	0.910706	0	0	0	0	17.2594	0	0	0	0	0	0
s__Ruminococcus_D bicirculans	1115.5835692108333	592.0823665551667	20.9037	0	539.7029772899999	27.568601951666665	113.516	0.8714606533333334	396.0847175516667	26.533261565666667	15.107469906666664	2.7291048866666667	237.5569560720972	316.34254525835183	1.2001885133333334	-8.04208	Sewage	SCFA-producing fermenters	Human_related	d__Bacteria	p__Bacillota_A	c__Clostridia	o__Oscillospirales	f__Ruminococcaceae	g__Ruminococcus_D	0	19.888	12.8314	10.5646	0	0	37.5401	0	0	3.58288	0	0	0	0	0	0	0	0	0	0
s__Diaphorobacter_A caeni	335.4823384408333	215.219	191.34121042333337	15.603150396666663	463.886	314.773	381.5606615616667	78.3753	348.329	733.819	504.6603443466667	47.64627697166666	302.55788031381945	387.6744293713889	47.2082331411111	-3.03774	NS	WWTP Core Functional	Non_Human_related	d__Bacteria	p__Pseudomonadota	c__Gammaproteobacteria	o__Burkholderiales	f__Burkholderiaceae_B	g__Diaphorobacter_A	0	0	161.276	0	0	0	0	0	0	0	0	0	0	0	0	0	0	0	0	0
s__Prevotella paludivivens	315.1100228458333	312.53676226166664	389.33371903833336	0	609.2587707566666	503.35085413166667	496.6149970366667	0.0492565733333333	41.42557438833334	191.462	633.986	89.75905957333335	298.57395283452774	388.1199019852963	29.936105382222227	-3.69654	NS	Opportunistic or Risk-associated	Human_related	d__Bacteria	p__Bacteroidota	c__Bacteroidia	o__Bacteroidales	f__Bacteroidaceae	g__Prevotella	0	230.079	0	21.6109	82.0499	18.337	0	0	0	29.9613	0	0	0	0	59.8871	51.9041	82.5142	0	0	0
s__Frigididesulfovibrio cuneatus	1581.8933951266663	244.846	106.96623751166663	0	6.499800063333333	6.305236518333333	2.6161337466666668	0.1042559383333333	0.128395	322.69212882000005	21.741101380000003	0	191.14940890874996	254.85429455185175	0.0347519794444444	-12.8403	Sewage	Unclassified	Unclassified	d__Bacteria	p__Desulfobacterota	c__Desulfovibrionia	o__Desulfovibrionales	f__Desulfovibrionaceae	g__Frigididesulfovibrio	0	0	0	0	0	0	0	0	0	0	0	0	0	0	0	0	0	0	0	1.45204
[truncated: 196 more rows]

## Sheet: Sheet8
Model_ID	MGE_Type	Name	Real_Output_Name	Inuse	Final_Name
PF03524	Conjugative	CagX	CagX	Yes	CagX
PF07863	Conjugative	CtnDOT_TraJ	CtnDOT_TraJ	Yes	CtnDOT_TraJ
PF10683	Transposase	DBD_Tnp_Hermes	DBD_Tnp_Hermes	Yes	DBD_Tnp_Hermes
[truncated: 267 more rows]

## Sheet: Sheet9
Chromosome
[truncated: 480 more rows]
[truncated: 29 more columns]

[truncated: 5 more sheets: Sheet10, Sheet11, Sheet12, Sheet13, Sheet14]
